# Supplementary material for: High throughput approaches reveal splicing of primary microRNA transcripts and tissue specific expression of mature microRNAs in Vitis vinifera
Source: PubMed Central journal article supplement (PMC2822795; doi:10.1186/1471-2164-10-558), 2009-11-25
Supplement: 1471-2164-10-558-S1.pdf [file 1471-2164-10-558-S1.pdf]

Supplemental Table S1: Frequencies of mapped small RNA reads by size and locus.

| <u>length</u> | <u># loci</u> | <u># reads</u> | <u>mean reads/locus</u> |
|---------------|---------------|----------------|-------------------------|
| 19            | 146612        | 1466320        | 10,001364               |
| 20            | 212166        | 2464169        | 11,614344               |
| 21            | 664229        | 6143363        | 9,248863                |
| 22            | 376958        | 2474858        | 6,565341                |
| 23            | 330553        | 674605         | 2,040838                |
| 24            | 896304        | 2038037        | 2,273823                |

Supplemental Figure S2: Log Expression levels of all predicted miRNAs in all tissues tested by oligonucleotide array. Error bars represent confidence intervals. Y axis represents Log2 of the normalized median of spot intensities

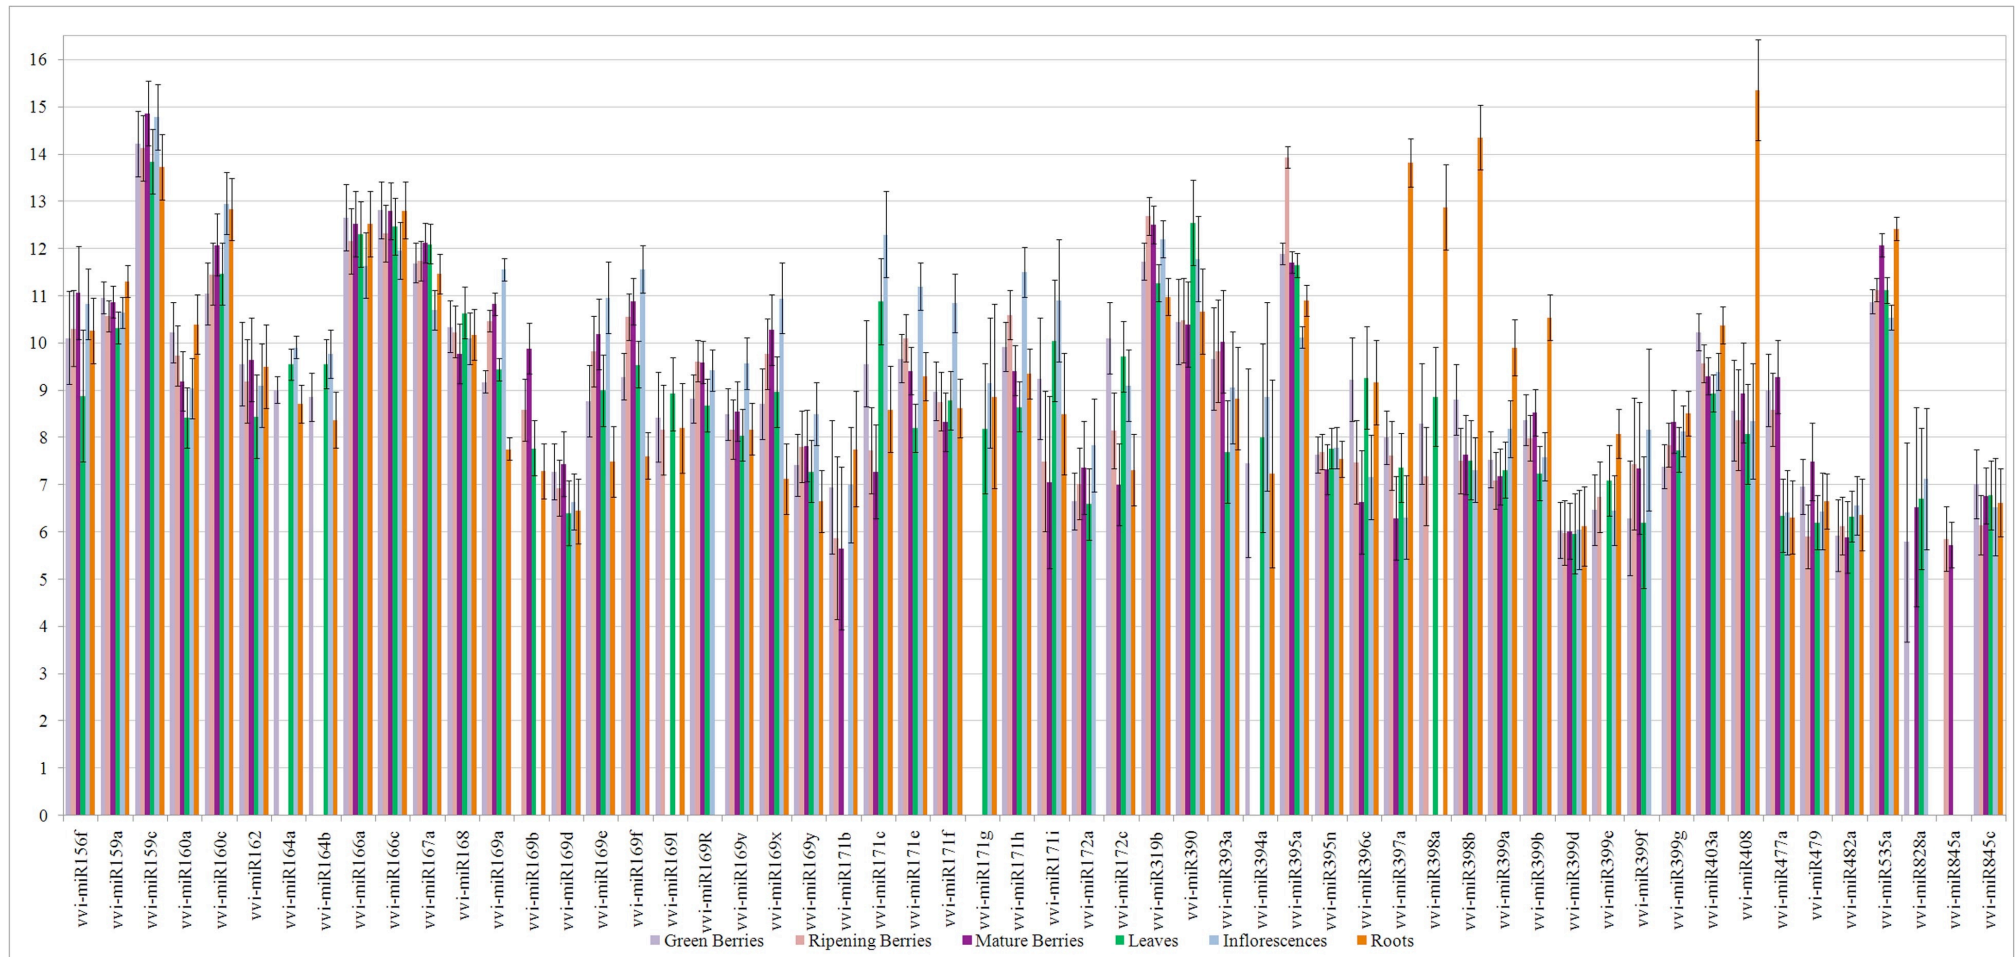



CTGACAGAAGAGACTGAGCACA 4  
TGACAGAAGAGACTGAGCACAC 4  
CTGACAGAAGAGACTGA 3  
CTGACAGAAGAGACTGAG 3  
ACAGAAGAGAGTGAACA 2  
ACTGACAGAAGAGACTGAGC 1  
GACAGAAGAGAGTGAACA 1  
ACTGACAGAAGAGACTGAGCA 1  
TGACAGAAGAGACTGAGCACACA 1

---

>vvi-MIR156c [sc:6 - 841232 841335] [chr:4 - 850300 850403]  
.....(((((.....))).....))..... (-60.20)  
AAGGAATAGGTGACAGAAGAGAGTGAACACATGGTCTTGCATGGGTCATGCTTGAAGCTCTGGGTGCTCACTCTCATCTGCTCCTCTCTCT  
TGACAGAAGAGACTGAGCAC 835876

TGACAGAAGAGACTGAGCACA 4751  
TGACAGAAGAGACTGAGCA 3092  
TGACAGAAGAGACTGAGC 1409  
GACAGAAGAGACTGAGCAC 475  
ACAGAAGAGACTGAGCAC 162  
GTGACAGAAGAGACTGAGCAC 112  
TGACAGAAGAGACTGAG 97  
GTGACAGAAGAGACTGAGCA 95  
GACAGAAGAGACTGAGCACA 90  
ACAGAAGAGACTGAGCACACA 42  
ACAGAAGAGACTGAGCACAC 30  
CAGAAGAGAGTGAACA 9  
GGTGACAGAAGAGACTGAGCAC 8  
ACAGAAGAGACTGAGCACACA 6  
TGACAGAAGAGACTGAGCACAC 4  
GTGACAGAAGAGACTGAGC 2  
ACAGAAGAGACTGAGCA 2  
GACAGAAGAGAGTGAACA 1  
GGTGACAGAAGAGACTGAGCA 1  
TGACAGAAGAGACTGAGCACACA 1  
TGACAGAAGAGACTGAGCACACATGG1

---

>vvi-MIR156d [sc:14 + 5411513 5411615] [chr:11 - 5633893 5633995]  
.....(((((.....))).....))..... (-47.50)  
AGAGAGAGACTGACAGAAGAGACTGACACATGCAGGCATTTGTATAAGGGTATACCTATGCCGGTGCCTGCCTCCTCTTTTGTGACAGTTAGGTCCT  
TGACAGAAGAGACTGAGCAC 835876

CTGACAGAAGAGACTGAGCAC 9068  
TGACAGAAGAGACTGAGCACACA 4751  
TGACAGAAGAGACTGAGCA 3092  
TGACAGAAGAGACTGAGC 1409  
GACAGAAGAGACTGAGCAC 475  
ACAGAAGAGACTGAGCAC 162  
CTGACAGAAGAGACTGAGCA 102  
TGACAGAAGAGACTGAG 97  
GACAGAAGAGACTGAGCACACA 90  
ACAGAAGAGACTGAGCACACA 42  
CTGACAGAAGAGACTGAGC 17  
TGACAGAAGAGACTGAGCACAT 12  
CAGAAGAGAGTGAACA 9  
ACTGACAGAAGAGACTGAGCAC 7  
ACAGAAGAGACTGAGCACAT 6  
AGACTGACAGAAGAGACTGAGCAC 5  
CTGACAGAAGAGACTGAGCACACA 4  
CTGACAGAAGAGACTGAG 3  
CTGACAGAAGAGACTGA 3



>vvi-MIR160a [sc:47 + 660403 660505] [chr:12 + 8539030 8539132]  
(((((((((.....)))))))))..... (-52.30)  
GGGGTTGATCTGGCTGGCTCCCTGAAATGCCATTAAGAAGCTTGTCAAGGTGTTGACTCTCTCCCTAGTTGGCATCAGAGGATCATGCAGGCCCAACATTT  
TGGCTGGCTCCCTGAAATGCCA 276  
TGCTGGCTCCCTGAAATGC 4  
CTGGCTCCCTGAAATGCCA 2

>vvi-MIR160b [sc:383 + 36508 36611] [chr:Un\_random + 78660926 78661029]  
..... ((-47.00)  
AATATTGTTCTGGCTGGCTCCCTGAAATGCCATTAAGAAGCTTGTAAAGAGTGTGACAACCTTCCTATTGGCATGAGGGGAGTCAAGCAGCGGAACACTT  
TGGCTGGCTCCCTGAAATGCCA 276  
TGCTGGCTCCCTGAAATGC 4  
CTGGCTCCCTGAAATGCCA 2

>vvi-MIR160c [sc:76 + 752851 752956] [chr:10 - 8894085 8894190]  
...(((.....)))..... (-58.30)  
AAATGGTTGGCTGGCTCCCTGAAATGCCACACAGTACAGACCACTCCCTTTCCCGGATGGCTATTGGCGGGTGGCGTGGAGGACCAAGCATACCCACCATTC  
TGGCTGGCTCCCTGAAATGCCA 130  
CTGGCTCCCTGAAATGCCA 1

>vvi-MIR160d [sc:29 - 1349764 1349865] [chr:8 + 11902361 11902462]  
..... ((-49.30)  
CATACTTACATGCTGGCTGGCTCCCTGAAATGCCATTTGCAAGCTCCACCGAGGATGGTAGCCTTCGCGGATGGCGTGGAGGACCATGCATGATCTGCTT  
TGGCTGGCTCCCTGAAATGCCA 130  
ATGCTGGCTCCCTGAAATGCCA 2  
CTGGCTCCCTGAAATGCCA 1  
TGCTGGCTCCCTGAAATGCCA 1

>vvi-MIR160e [sc:1809 - 11818 1192] [scaffold not incorporated in genome assembly]  
..... ((-47.00)  
AATATTGTTCTGGCTGGCTCCCTGAAATGCCATTAAGAAGCTTGTAAAGAGTGTGACAACCTTCCTATTGGCATGAGGGGAGTCAAGCAGCGGAACACTT  
TGGCTGGCTCCCTGAAATGCCA 276  
TGCTGGCTCCCTGAAATGC 4  
CTGGCTCCCTGAAATGCCA 2

>vvi-MIR160f [sc:17 - 2195098 2195199] [chr:13 + 5553097 5553198]  
..... ((-51.10)  
TAAGCATATATGCTGGCTGGCTCCCTGAAATGCCATTTGCAAGCTCCACCGGACATCGATGGCTTCGCGGATGGCGTGGAGGACCATGCATATGCCCATCT  
TGGCTGGCTCCCTGAAATGCCA 130  
ATGCTGGCTCCCTGAAATGCCA 2  
CTGGCTCCCTGAAATGCCA 1  
TGCTGGCTCCCTGAAATGCCA 1

>vvi-MIR162 [sc:16 - 630729 630831] [chr:17 + 4714987 4715089]  
..... ((-41.70)  
TGAAGTCACTGGATGCAGCGGTTTCATCGATCTCTCCCTGAAATGTTGTGAAAAAGCAGATCAAGAATCGGTGCGTAAACCTCTGCATCCAGCGTTCACTCC  
TCGATAAACCTCTGCATCCAG 1

>vvi-MIR164a [sc:42 - 451600 451720] [chr:7 - 3651395 3651515]  
..... ((-45.00)  
AGTCCCTTGGTGGAGAAGCAGGGCACGTGCAGATTTGGCTCAGTTTTTCOCCTTTTCTCCTTTACTCCACCACCGCCACAGGGTTGACAGTGCCTCCCTTCCCAACATGGGTTCCT  
TGGAGAAGCAGGGCACCTGC 13841  
TGGAGAAGCAGGGCACCTGC 19  
TGGAGAAGCAGGGCACCTGC 19  
TGGAGAAGCAGGGCACCTGC 13  
GGAGAAGCAGGGCACCTGCA 8  
TGGAGAAGCAGGGCACCTGC 5  
GTTGGAGAAGCAGGGCACCTGCA 1  
GAGAAGCAGGGCACCTGCA 1

>vvi-MIR164b [sc:7 - 511008 511100] [chr:9 - 511008 511100]  
..... ((-38.80)  
TAAACCATGCTGGAGAAGCAGGGCACATGCTGGATCAATCAGCACCTGGATCTGAGATTTTACATGTCCTGGCTCCTCCACTTGATCTCTTA  
TGGAGAAGCAGGGCACATGC 1  
TGGAGAAGCAGGGCACATGC 1

>vvi-MIR164c [sc:88 + 655651 655747] [chr:8 + 8981162 8981258]  
..... ((-25.61)  
TTGAGCAAGATGGAGAAGCAGGGCACGTGCATTAAGTCTATGACCCACAAACCAATAATCTTTGTGCTGAGTTAGAGCTCTGCTGCTGCTTGTG  
TGGAGAAGCAGGGCACCTGC 13841  
TGGAGAAGCAGGGCACCTGC 99  
TGGAGAAGCAGGGCACCTGCAT 20  
TGGAGAAGCAGGGCACCTGC 19



GAAATGTTGTCTGGCTCGAGG 1  
AGGGGAATGTTGTCTGGCTC 1  
GAGGGGAATGTTGTCTGGCTC 1

GACCAGGCTTCATTCCCC 1  
CGGACCAGGCTTCATTCC 1  
TCGGACCAGGCTTCATTCCCCCAAT 1  
TCGGACCAGGCTTCATTCCCCCA 1

>vvi-MIR166d [sc:86 - 899379 899538] [chr:16 - 7520920 7521079]  
.....(((((((.....(((((.....(((((.....(((((.....(((((.....(((((.....(((((.....(((((.....(((((.....(((((.....(.....)))))))))))))))))))))))))))))))))))))))))))))))))))))))))))))))))))))) ..... (-50.99)  
CTGCTTTGAGGGGATTGTGTCTGGCTCGAGGCCACCAACCACTTTGATTGATTCAAATACCTTGATCAGCTTCAACCCACTTCTCCCTCAATTCAATTCCACCCTTGATTATGTGTAGTGCCTCGGACCAGGCTTCATTCCCTCAATCACTGC

TCGGACCAGGCTTCATTCC 219273  
TCGGACCAGGCTTCATTCC 1496  
TCGGACCAGGCTTCATTCC 1281  
GGACCAGGCTTCATTCC 791  
TCGGACCAGGCTTCATT 529  
TCGGACCAGGCTTCATTCCCC 180  
CGGACCAGGCTTCATTCC 128  
TCGGACCAGGCTTCATT 118  
CTGGACCAGGCTTCATTCC 118  
GGACCAGGCTTCATTCC 103  
CTGGACCAGGCTTCATTCC 38  
CGGACCAGGCTTCATTCC 10  
GGACCAGGCTTCATTCC 8  
CGGACCAGGCTTCATTCCCT 7  
CCTCGGACCAGGCTTCATTCC 5  
CGGACCAGGCTTCATTCC 2  
CCTCGGACCAGGCTTCATTCC 2  
CTGGACCAGGCTTCATT 1  
CGGACCAGGCTTCATT 1  
CTGGACCAGGCTTCATTCC 1  
GACCAGGCTTCATTCC 1  
GGACCAGGCTTCATTCCCT 1

>vvi-MIR166e [sc:105 - 1099967 1100132] [chr:2 + 2180274 2180439]  
(((.....(((((.....(((((.....(((((.....(((((.....(((((.....(((((.....(((((.....(((((.....(((((.....(((((.....(((((.....(((((.....(((((.....(.....)))))))))))))))))))))))))))))))))))))))))))))))))))))))))))))))))))))) ..... (-71.80)  
GTGTTTGAAGGGGATGTTGTCTGGCTCGAGGCCACCAACTAGATCTATGATCTGCTGTAATTTGTAATGGTGTATGCTCTCAGTTTTGAAGGAGAGATTTGAGTGTATTTGATCGTGGTGGTGTGCTCGGACCAGGCTTCATTCCCCCAATTATTTG

TCGGACCAGGCTTCATTCC 219273  
TCGGACCAGGCTTCATTCC 1496  
TCGGACCAGGCTTCATTCC 1281  
GGACCAGGCTTCATTCC 791  
TCGGACCAGGCTTCATT 529  
CGGACCAGGCTTCATTCC 128  
TCGGACCAGGCTTCATT 118  
GGACCAGGCTTCATTCC 103  
TCGGACCAGGCTTCATTCCCC 89  
CGGACCAGGCTTCATTCC 10  
GGACCAGGCTTCATTCC 8  
GTGGACCAGGCTTCATTCC 5  
CGGACCAGGCTTCATTCC 2  
TCGGACCAGGCTTCATTCCCC 2

TTTGAAGGGGATGTTGTCTGG 51  
  
GAGGGGAATGTTGTCTGGCTC 1  
AGGGGAATGTTGTCTGGCTC 1  
GGAATGTTGTCTGGCTCGAGG 1

CGGACCAGGCTTCATT 1  
GACCAGGCTTCATTCC 1  
TCGGACCAGGCTTCATTCCCCCA 1  
TCGGACCAGGCTTCATTCCCCCAAT 1

>vvi-MIR166f [sc:20 - 663678 663777] [chr:7 + 14569971 14570070]  
(((((((.....(((((.....(((((.....(((((.....(((((.....(((((.....(((((.....(((((.....(((((.....(((((.....(((((.....(((((.....(.....)))))))))))))))))))))))))))))))))))))))))))))))))))))))))))))))))))))) ..... (-49.50)  
TGTAGTTGTGGGGAATGTTGGCTGGCTCGAGGCTTTCTTGAGTATTTATGTATACCTCAAAAAGCTTCGGACCAGGCTTCATTCCCTCAACACACT

TCGGACCAGGCTTCATTCC 219273  
TTCGGACCAGGCTTCATTCC 44209  
TCGGACCAGGCTTCATTCC 1496  
TCGGACCAGGCTTCATTCC 1281  
GGACCAGGCTTCATTCC 791  
TTCGGACCAGGCTTCATT 529  
TTCGGACCAGGCTTCATTCC 237  
TTCGGACCAGGCTTCATTCCCC 180  
TTCGGACCAGGCTTCATT 170  
CGGACCAGGCTTCATTCC 128  
TCGGACCAGGCTTCATT 118  
GGACCAGGCTTCATTCC 103  
TTCGGACCAGGCTTCATT 47  
TTCGGACCAGGCTTCATT 27  
CTTCGGACCAGGCTTCATTCC 22  
CGGACCAGGCTTCATTCC 10  
TTCGGACCAGGCTTCATTCC 9  
GGACCAGGCTTCATTCC 8













>vvi-MIR169y [sc:180 - 169908 170155] [chr:1 + 14661042 14661289] ...  
CGTTGTGGTAGCGAAGGATGACTTGCCTACAGCCCTTAAAGTTTCAAATAACCGAGCTTGTCTACCTTTGATCAAATGATTCAAGAAACAAAAGAAAAGAACCCATGGCAGCCATCCATCAGAGTCAACATGAGAAATCATGTCTATAGAAAATGGAGTCATTCCTGAGAATGAACACGACACTATTAGCTTGGAATCTATATGTGGTTATGGCAAGTCCTTGGCACC  
TGATGGCCTC  
TAGCGAAGGATGACTTGCCTA 0

>vvi-MIR171a [sc:9 + 461317 461415] [chr:14 - 14693988 14694086] (-47.80)  
TGGTGGGAAGCGTGATGTGGGACGGCTCAATCAAACCAAGATCTCAATGGTTGAGTCCTTTAATCTGATTGAGCCGTGCCAATATCATGTTCAAATAC  
TTGAGCCCGTGCCAAATATCATG 0  
TGATTGAGCCCGTGCCAAATATC 637  
TGATTGAGCCCGTGCCAAATA 43  
TGATTGAGCCCGTGCCAAATAT 4  
TGATTGAGCCCGTGCCAAAT 4  
TGATTGAGCCCGTGCCAA 1  
CTGATTGAGCCCGTGCCAAATATC 1

>vvi-MIR171b [sc:36 - 591211 591309] [chr:12 + 7277319 7277417] (-46.90)  
TGGGGGGGAGGATTTGGCGGCTCAAATTTAAAGACATGGTTAGATTGAAGAGATATTAGCCATGTGATTTGATTGAGCCCGCTCAATATCTCCTTTTGCA  
TGATTGAGCCCGCTCAATATC 0

>vvi-MIR171c [sc:36 - 536559 536661] [chr:12 + 7331967 7332069] (-48.00)  
TGGATTTACGGGATATTTGGTCGGCTCAATAAGAAAGCAGTGCTCGCAATCTTTTTGAGTTCTGGTTTTGATTGAGCCGTGCCAATATCACGTGTCATTTGCT  
TGATTGAGCCCGTGCCAAATATC 637  
TGATTGAGCCCGTGCCAAATA 43  
TGATTGAGCCCGTGCCAAAT 4  
TGATTGAGCCCGTGCCAAAT 4  
TTGAGCCCGTGCCAAATATCAG 4  
TTGAGCCCGTGCCAAATATC 2  
TGATTGAGCCGTGCCAA 1

>vvi-MIR171d [sc:795 - 2155 2254] [scaffold not incorporated in genome assembly] (-38.60)  
TAGATACACGAGATATTTGATACGGTTCAATTAGAAAGCTGTGTCTAAGTTAAGAACTCTGTGTTGATTGAGCCGTGCCAATATCACGTCTACTTCT  
TGATTGAGCCCGTGCCAAATATC 637  
TGATTGAGCCCGTGCCAAATA 43  
TGATTGAGCCCGTGCCAAAT 4  
TGATTGAGCCCGTGCCAAAT 4  
TTGAGCCCGTGCCAAATATCAG 4  
TTGAGCCCGTGCCAAATATCAC 2  
TGATTGAGCCGTGCCAA 1

>vvi-MIR171e [sc:13 + 5162582 5162684] [chr:11 + 5162582 5162684] (-44.70)  
GGAAAGTAAGCGATTTGGTGAAGTTCAATCCGAAAGCAGATTTACGAAGAGCCGTAAAGAAATCACTCAGATTTTGGTTGAGCCCGTGCCAATATCACACTTTCTGTAAAG  
TGATTGAGCCCGTGCCAAATATC 53  
TGATTGAGCCCGTGCCAAATA 4  
TGATTGAGCCCGTGCCAA 1

>vvi-MIR171f [sc:104 - 699397 699499] [chr:9 + 7000493 7000595] (-45.90)  
TTGAAAGAAGCGATTTGGTGAAGTTCAATCTGAAGATTTGATTTATGCTTGAATGTAAAACATGATCTCAGATTGAGCCCGTGCCAATATCACACTTTCTGTGGC  
TTGAGCCCGTGCCAAATATCACT 0

>vvi-MIR171g [sc:1 - 10508015 10508090] [chr:18 + 3212869 3212944] (-21.70)  
GCCAGCCTTCCATGTTGGTTCCATCGGTGGGGACACCAACTCTTGAGCCGAACCAATATCACCCGAGCCAAAT  
TTGAGCCGAACCAATATCAC 0

>vvi-MIR171h [sc:16 + 3531871 3531966] [chr:17 - 1813852 1813947] (-47.30)  
TTPCCAGAGATGTGGTGCGGTTCAACCTAACCTGATGTCATGAAATGATCGACTCTGATGTTGGTTGAGCCCGTGCCAATATCCCGCTCAATC  
TGGTTGAGCCCGTGCCAAATATC 0



>vvi-MIR319b [sc:5 + 4170832 4171025] [chr:1 + 4170832 4171025] (-102.82)  
..(((((((.....)))))).....)  
TTGGAAGAAGGAGCTCTCTTAGTCCAATCCGAGACAGCTCAAGGCTGATACCTGGCTGCTGACTCGTTGCTTCAAGAACATCATACATAGGCCGGAAGAAGATGGATGGTTTGTGATCCAACAGATGCGAGAGCTGCGTTTATGCTGTCACGTCCTGGACTGAAGGGAGCTCCCTTGTATCCACA  
CTTGGACTGAAGGGAGCTCCCT 0  
TTGGACTGAAGGGAGCTCCCT 1

>vvi-MIR319c [sc:132 + 439049 439230] [chr:2 - 661750 661931] (-83.40)  
...(((((((.....)))))).....)  
TTACATTGAAGAGAGCTTTCTTCACTCCACTCATGGTGGCAGTAGGATGAATTAGCTGCCGACTCATTCATCCAAATACCTGTGTTAAGACTACCCGATAAATGATGAATGATGCGGGAGACAAATGGATCTTAAAGCTCCCTGTGCTTGGACTGAAGGGAGCTCCCTTCACTGCAATC  
CTTGGACTGAAGGGAGCTCCCT 0  
AGCTGCCGACTCATTATCCCA 3  
TTGGACTGAAGGGAGCTCCCT 1

>vvi-MIR319e [sc:13 + 4274222 4274328] [chr:11 + 4274222 4274328] (-40.40)  
..(((((((.....)))))).....)  
TGCAGAAATGGGGTTCCTTTGACGCCAAAACAACCTCCATCGCTGAAGAAGATGATGAATCTCATGCTCCTGTGTTTGGACTGAAGGGAGCTCCCTTCACTGCTCTCT  
TTGGACTGAAGGGAGCTCCCT 0  
TTGGACTGAAGGGAGCT 1

>vvi-MIR319f [sc:3 - 409791 409983] [chr:6 + 9069150 9069342] (-88.70)  
..(((((((.....)))))).....)  
AGTGGTTTAAAGAGAGCTTCCCTCAGTCCACTCATGGATGGTTAGGGTTGGATTAGCTGCCGACTCATTCATCAACACAGTAGAATGGAATGGATTACTACTGTGATGTTGATGATGCGGGAGGTAATTCATCCTTTTCTGCTGTGGACTGAAGGGAGCTCCCTTCACTGCTTCT  
CTTGGACTGAAGGGAGCTCCCT 0  
TTGGACTGAAGGGAGCTCCCT 1

>vvi-MIR319g [sc:16 + 1677842 1678063] [chr:17 - 3667755 3667976] (-96.00)  
..(((((((.....)))))).....)  
GAACAGCTGAAGAGCTCCTTTAGTCCAATAAAGAGGGCTGAGGGGGCGCCAGAGCTGCCATCTCATGCACTTGGCTATGCTTATTCTTCTCAATCAATTGCTGCGAGTATGGCTGGAGTGACAAATGCTAAGTTTTCCTGATGATGACATGGGACAACTCCTCCGACGCTTTGCCACTCATTGGACTGAAGGGAGCTCCAGGGCAGATCT  
ATTGGACTGAAGGGAGCTCCCT 0

>vvi-MIR390 [sc:3 - 1385305 1385444] [chr:6 + 8093689 8093828] (-62.30)  
..(((((((.....)))))).....)  
AGAATCTGTAAAGCTCAGGAGGGATAGCCCATGAGCCATGAGAAAATGATGTTGAGTTGAAAATTTTCTAGCTGTTTGTGGCTCATCATTTTGTGTGTGGCCCTATCTATCCCTGAGTTTCAAGGGTCTCTC  
AAGCTCAGGAGGATAGCCGC 141  
AAGCTCAGGAGGATAGCCCA 5  
AAGCTCAGGAGGATAGCCG 4  
AAGCTCAGGAGGATAGCCG 1  
AAGCTCAGGAGGATAGCCGC 1  
TCAGGAGGATAGCCGC 1

>vvi-MIR393a [sc:222 - 104163 104288] [chr:Un\_random - 54807498 54807623] (-53.90)  
..(((((((.....)))))).....)  
GGTGGACAGTTCCAAGGGATCGCATTTGATCCCAACTGCTTCCACCTCTCTTACCAGACTATCATAAACAAGCTGGCCCTTTTCCCATTGGATCATGCTATCCCTTAGGAACCTCCCATCAG  
TCCAAGGGATCGCATTGATCC 0  
TTCCAAGGGATCGCATTGAT 14983  
TCCAAGGGATCGCATTGATC 398  
TCCAAGGGATCGCATTGA 136  
TTCCAAGGGATCGCATTGATC 127  
CAAAGGGATCGCATTGAT 46  
TCCAAGGGATCGCATTGAT 30  
TCCAAGGGATCGCATTGA 19  
CAAAGGGATCGCATTGATC 7  
TTCCAAGGGATCGCAT 5  
TCCAAGGGATCGCAT 4  
TTCCAAGGGATCGCATTG 4  
AAAGGGATCGCATTGAT 2  
TCCAAGGGATCGCATTG 1  
CAAAGGGATCGCATTGA 1

>vvi-MIR393b [sc:17 - 3375224 3375306] [chr:13 + 4372990 4373072] (-45.70)  
..(((((((.....)))))).....)  
GGAGGAGGATCCAAGGGATCGCATTTGATCCCAACTGCTTCCATGCTTGGATCATGCTATCCCTTTGGATTCCCTCCTTTGG  
TCCAAGGGATCGCATTGATCC 0  
TTCCAAGGGATCGCATTGATC 398  
CAAAGGGATCGCATTGAT 46  
TCCAAGGGATCGCATTGAT 30  
TCCAAGGGATCGCATTGA 19  
CAAAGGGATCGCATTGATC 7  
ATCCAAGGGATCGCATTGAT 4  
AAAGGGATCGCATTGAT 2  
TCCAAGGGATCGCAT 1  
CAAAGGGATCGCATTGA 1

>vvi-MIR394a [sc:38 + 1925563 1925651] [chr:12 - 14925943 14926031]



(((.....)))))).. (-51.01)  
CAGAGCCATTGGCATTCTGCCACCTCCATGCACATCATGGGTCTATATCTTTGGAGGTGGCCAGCATGCCAARGTGGCTCTGTA  
TTGGCATTCTGCCACCTCC 748  
TTGGCATTCTGCCACCTCCA 9  
GGCATTCTGCCACCTCC 3  
TTGGCATTCTGCCACCTC 3  
TTGGCATTCTGCCACCT 2  
TTGGCATTCTGCCACC 1

>vvi-MIR394b [sc:1 + 12335062 12335154] [chr:18 - 1385805 1385897] ((.....)).. (-42.60)  
ACAGAGTTATTGGCATTCTGCCACCTCCCATCTCTTGAAAATCTCTTTTCTCTCTGTGGAGGTGGGCATACTGCCAACCAAGCTCTGTT  
TTGGCATTCTGCCACCTCC 748  
GGCATTCTGCCACCTCC 3  
TTGGCATTCTGCCACCTC 3  
TTGGCATTCTGCCACCT 2  
TTGGCATTCTGCCACC 1  
ATTGGCATTCTGCCACCTCC 1

>vvi-MIR394c [sc:1 + 10217177 10217278] [chr:18 - 3503681 3503782] ((.....)).. (-59.50)  
CAGAGCCATTGGCATTCTGCCACCTCCATATATACCAATCTTCTGAATGGCGCCACAAAGCTTTGGAGGGCCAGGATGCCAATGGCTCTGTA  
TTGGCATTCTGCCACCTCC 748  
TTGGCATTCTGCCACCTCCA 9  
GGCATTCTGCCACCTCC 3  
TTGGCATTCTGCCACCTC 3  
TTGGCATTCTGCCACCT 2  
TTGGCATTCTGCCACC 1

>vvi-MIR395a [sc:5 + 6669509 6669600] [chr:1 + 6669509 6669600] ..... (-40.86)  
GTCCCTTAGAGTTCCCTTGATCACTTCACTAGGAGCTTCGCTAGTTTAAATGACTTCCCTACTGAAAGTGTGGGGGAACCTGGTACCGA  
TGAAGTGTGGGGGAAC 198  
TGAAGTGTGGGGGAAC 3  
CTGAAGTGTGGGGGAAC 2  
AAGTGTGGGGGAAC 1  
GAAGTGTGGGGGAAC 1  
TGAAGTGTGGGGGAAC 1

>vvi-MIR395b [sc:5 + 6643441 6643530] [chr:1 + 6643441 6643530] ..... (-34.90)  
GTCCCTTAGAGTTCCCTTACCACCTTCACTGGGATCTCTCTAATGAATGCCTACGTACTGAAAGTGTGGGGGAACCTGGTGCAT  
TGAAGTGTGGGGGAAC 198  
TGAAGTGTGGGGGAAC 3  
CTGAAGTGTGGGGGAAC 2  
AAGTGTGGGGGAAC 1  
GAAGTGTGGGGGAAC 1  
TGAAGTGTGGGGGAAC 1

>vvi-MIR395c [sc:5 - 6640691 6640782] [chr:1 - 6640691 6640782] ..... (-37.80)  
GTCCCTTAGAGTTCCCTTACCACCTTCACTGGGACCTCTCTAGTTATAATGACTTCCCTACTGAAAGTGTGGGGGAACCTGGTGCAT  
TGAAGTGTGGGGGAAC 198  
TGAAGTGTGGGGGAAC 3  
CTGAAGTGTGGGGGAAC 2  
TGAAGTGTGGGGGAAC 1  
GAAGTGTGGGGGAAC 1  
AAGTGTGGGGGAAC 1

>vvi-MIR395d [sc:5 + 6653540 6653625] [chr:1 + 6653540 6653625] ..... (-40.80)  
GCCCTTAGAGTTCCCTTACCACCTTCACTGGGATCTCTCTAATGACTTCCCTACTGAAAGTGTGGGGGAACCTGGTGCAT  
TGAAGTGTGGGGGAAC 198  
TGAAGTGTGGGGGAAC 3  
CTGAAGTGTGGGGGAAC 2  
AAGTGTGGGGGAAC 1  
GAAGTGTGGGGGAAC 1  
TGAAGTGTGGGGGAAC 1

>vvi-MIR395e [sc:5 + 6646025 6646116] [chr:1 + 6646025 6646116] ..... (-37.30)  
CTCCCTTAGAGTTCCCTTACCACCTTCACTGGGACCTCTCTAATATAATGACTTCCCTACTGAAAGTGTGGGGGAACCTGGTGCAT  
TGAAGTGTGGGGGAAC 198  
TGAAGTGTGGGGGAAC 3  
CTGAAGTGTGGGGGAAC 2





AGTGCAGCGTTGATGAA 6  
ATTGAGTGCAGCGTTGATGA 6  
TTGAGTGCAGCGTTGATG 3  
TCATTGAGTGCAGCGTTGATG 2  
TTGAGTGCAGCGTTGAT 1  
ATTGAGTGCAGCGTTGATGAAA 1  
ATTGAGTGCAGCGTTGATG 1  
ATTGAGTGCAGCGTTGA 1  
CATTGAGTGCAGCGTTGATGA 1

>vvi-MIR397b [sc:1477 - 246 363] [chr:Un\_random - 146568042 146568159] (-46.40)  
.....(((.(((((((((((((((((((((((((.....)))))))))...)))...)))...))).....)))).  
GAAGAAAACATCATTGAGTGCAGCGTTGATGAACTGAAGTATCCATTTTTCAGCTCTCTTGAAGTCCCGCAAGATGGGTTCTGGTGTATCCATTGGCCGCTGCCTCAATCATGTG

ATTGAGTGCAGCGTTGATGAA 714  
TTGAGTGCAGCGTTGATGAA 96  
TTGAGTGCAGCGTTGATGAAA 88  
TTGAGTGCAGCGTTGATGA 15  
TTGAGTGCAGCGTTGATGAAA 13  
ATTGAGTGCAGCGTTGATGA 6  
AGTGCAGCGTTGATGAA 6  
TTGAGTGCAGCGTTGATG 3  
TCATTGAGTGCAGCGTTGATG 2  
ATTGAGTGCAGCGTTGA 1  
TTGAGTGCAGCGTTGATG 1  
ATTGAGTGCAGCGTTGATG 1  
CATTGAGTGCAGCGTTGATGA 1  
ATTGAGTGCAGCGTTGATGAAA 1

>vvi-MIR398a [sc:5 + 717225 717327] [chr:1 + 717225 717327] (-55.60)  
.....(((.(((((((((((((((((((((((((.....)))))))))...)))...)))...))).....)))).  
ACACCCCAAGGAGTGCAGCGTTGAGAAACACCGGTTGTGTGGCTGCACAAAGCTCTGCTAGCTAATGCATTTGTGTTCTCAGGTCACCCCTTGGGGCACCA

TTCTCAGGTCACCCCTTGGG 13  
TGTGTTCTCAGGTCACCCCT 6  
TGTGTTCTCAGGTCACC 1  
TGTGTTCTCAGGTCACCC 1

>vvi-MIR398b [sc:25 + 3324549 3324636] [chr:6 - 20660658 20660745] (-44.70)  
.....(((.(((((((((((((((((((((((((.....)))))))))...)))...)))...))).....)))).  
GTGTCCACAGGTGAGACTGAGAATCACATGCCCGCACACCCTCTTTGCTCTCATGTGTTCTCAGGTCGCCCTGCTGACTCCC

TGTGTTCTCAGGTCGCCCTG 0  
CTCATGTGTTCTCAGGTCGCC 15  
TGTGTTCTCAGGTCGCC 5  
GTGTTCTCAGGTCGCCCTGC 1  
TGTGTTCTCAGGTCGCC 1  
ATGTTCTCAGGTCGCC 1  
CATGTGTTCTCAGGTCGCC 1  
TCATGTGTTCTCAGGTCGCC 1

>vvi-MIR398c [sc:15 - 78481 78568] [chr:6 + 14851882 14851969] (-45.80)  
.....(((.(((((((((((((((((((((((((.....)))))))))...)))...)))...))).....)))).  
GTGTCCACAGGAGTACCTGAGAATCACATGCCCGCATCACCCTCTTTGCTCTCATGTGTTCTCAGGTCGCCCTGCTGACTCCC

TGTGTTCTCAGGTCGCCCTG 0  
CTCATGTGTTCTCAGGTCGCC 15  
TGTGTTCTCAGGTCGCC 5  
TCATGTGTTCTCAGGTCGCC 1  
CATGTGTTCTCAGGTCGCC 1  
ATGTTCTCAGGTCGCC 1  
TGTGTTCTCAGGTCGCC 1  
GTGTTCTCAGGTCGCCCTGC 1

>vvi-MIR399a [sc:81 - 819715 819811] [chr:10 + 1853461 1853557] (-51.32)  
.....(((.(((((((((((((((((((((((((.....)))))))))...)))...)))...))).....)))).  
GAGAATAACAGTGTGATTTCTCCTTTGGCAGAGATATCAGCATGGAGTAGAGGCCGTAGTCTGCTGCCAAGGAGAATTGCCCTGTTAATCAATT

TGCCAAGGAGAATTGCCCTG 106  
TGCCAAGGAGAATTGCC 4  
TGCCAAGGAGAATTGCCCTGTT 3  
TGCCAAGGAGAATTGCC 2  
CAAAGGAGAATTGCCCTG 1  
TGCCAAGGAGAATTGCCCTGT 1  
AAAGGAGAATTGCCCTGT 1  
AAAGGAGAATTGCCCTGTT 1

>vvi-MIR399b [sc:376 + 84186 84302] [chr:Un\_random + 77999653 77999769] (-48.22)  
.....(((.(((((((((((((((((((((((((.....)))))))))...)))...)))...))).....)))).





TATAAAGTTTCTTGTCAAATGAGTATTCCAACAACAGCTTGTGAAGCAATGATTACTGTCTATAGTCTCTGATGTGGATTGTTGTTGAGATGCTCATTGAGGAAGCAACCTTAAAAATG  
TCTTGTCTCAAATGAGTATTCCA 0

>vvi-MIR828b [sc:5 + 2945837 2945908] [chr:1 + 2945837 2945908] ..... (-21.00)  
...(((((((.....)))))).....  
GCTCTGGTTTCTTGTCAAATGAGTATTCCAACAACAGCTTGTGAAGCAATGATTACTGTCTATAGTCTCTGATGTGGATTGTTGTTGAGATGCTCATTGAGGAAGCAACCTTAAAAATG  
TCTTGTCTCAAATGAGTATTCCA 0

>vvi-MIR845a [sc:86 + 3156 3597] [chr:16 + 6624697 6625138]  
.....(((((((.....)))))).....  
TTTCACTTGATTAGTTCCTTCAATGAGTATTGCAAGTAATCTCCAAATTTCCCTTAGCGGATTACATTGACATATTCTATTATATTCATTCCATAGCACATTGCAAAAGTAAAAACGACTTAGCATTTAATTGAAAATTTCTCTATCAAGCTCATCCATTCTGCTTGGGTTTTGGAAACCAAATTCATCAACTAAATTTAGTGGGTAAGTTGGCCATCTCAATGGCA  
TCCCATACATCAAAATCAGTTGATTGTAAGTACCAAGTCATTTAGCTTTCCAATAGGGATAGTCGGTTCGCCATAAAGAAATGGAGCTCTATGTTTGAACAATTTTCAGTTTGAGATGAGCTTGATGGAAATAGCCATTTTCCTCTAGATGATTAAGTCTTAAGCAAGAGGTCTAGCTCTGATACCAATTTGATAAAACAAAGGC  
TAGCTCTGATACCAATTGATA 0

>vvi-MIR845b [sc:216 + 313861 314302] [chr:Un\_random + 53496712 53497153]  
.....(((((((.....)))))).....  
TTTCACTTGATTAGTTCCTTCAATGAGTATTGCAAGTAATCTCCAAATTTCCCTTAGCGGATTACATTGACATATTCTATTATATTCATTCCATAGCACATTGCAAAAGTAAAAACGACTTAGCATTTAATTGAAAATTTCTCTATCAAGCTCATCCATTCTGCTTGGGTTTTGGAAACCAAATTCATCAACTAAATTTAGTGGGTAAGTTGGCCATCTCAATGGCA  
TCCCATACATCAAAATCAGTTGATTGTAAGTACCAAGTCATTTAGCTTTCCAATAGGGATAGTCGGTTCGCCATAAAGAAATGGAGCTCTATGTTTGAACAATTTTCAGTTTGAGATGAGCTTGATGGAAACAAACCTTTTCCTCTAGATGATTAAGTCTTAAGCAAGAGGTCTAGCTCTGATACCAATTTGATAAAACAAAGGC  
TAGCTCTGATACCAATTGATA 0

>vvi-MIR845c [sc:31 - 2686178 2686267] [chr:7 + 503529 503618] ..... (-30.30)  
...(((((((.....)))))).....  
CAATTTAGTGGTTTTGTTGCTGAGTTCATGTTGGCAATTTCTTAATGATTAAACATGAGGCTCTGATACCAATTTGATGCATAAAACCAT  
AGGCTCTGATACCAATTGATG 0

>vvi-MIR845d [sc:30 - 551951 552081] [chr:Un\_random - 108642758 108642888] ..... (-32.25)  
.....(((((((.....)))))).....  
ATAACCAACATTAATTATCCCTAGGGCCATGGGATAAACAAAACCTTCGAAAACCAAGTTAGCACACCTTAGAATGGTCTAGACAAATTAACCTATGGCTCTGATACCAATTTGATGGGAAAAACCT  
TGGCTCTGATACCAATTGATG 0

>vvi-MIR845e [sc:168 + 268220 268350] [chr:Un\_random + 37572078 37572208] ..... (-31.30)  
.....(((((((.....)))))).....  
AGAACGCACATTAATTATCCCTAGGGCCATGGGATAAACAAAACCTTCGAAAACCAAGTTAGCACACCTTAGAATGGTCTAGCACGATTAACTAACCCTATGGCTCTGATACCAATTTGATGGGAAAAACCTC  
TGGCTCTGATACCAATTGATG 0

**Supplemental Figure S4: predicted transcript and intron coordinates for 25 *Vitis vinifera* pri-miRNAs.** For each miRNA genomic locus showing extensive coverage with Illumina RNAseq reads, Transcription start and (where possible) stop coordinates were estimated from read coverage. Introns were predicted as explained in the main text. The table shows transcript coordinates estimated from different tissues, frequencies of support for introns(by tissue), splice site scores, promoter coordinates estimated by TSS-TCM, and notes showing additional support obtained for introns and transcript coordinates



| icroRNA                                  | Chr                            | strand           | TSS(TSSP-TCM)                            | TATA(TSSP-TCM)       | Leaf start                                | Stem start                          | Root start                      | Callus start                    | Leaf Stop                           | Stem stop                  | Root stop            | Callus stop          | donor                                                                                                                                                  | donor score                                                                                                                                                          | donor support                                                 | acceptor acceptor score                                                                                                                                | acceptor support                                                                                                                                                                 | leaf                                                                                                                                               | stem                                                               | root                                                               | callus                                                                  | f reads                                                            | Additional Info (support for introns, RACE start/stop)             |                                                                    |                                                                    |                                           |  |                                                    |
|------------------------------------------|--------------------------------|------------------|------------------------------------------|----------------------|-------------------------------------------|-------------------------------------|---------------------------------|---------------------------------|-------------------------------------|----------------------------|----------------------|----------------------|--------------------------------------------------------------------------------------------------------------------------------------------------------|----------------------------------------------------------------------------------------------------------------------------------------------------------------------|---------------------------------------------------------------|--------------------------------------------------------------------------------------------------------------------------------------------------------|----------------------------------------------------------------------------------------------------------------------------------------------------------------------------------|----------------------------------------------------------------------------------------------------------------------------------------------------|--------------------------------------------------------------------|--------------------------------------------------------------------|-------------------------------------------------------------------------|--------------------------------------------------------------------|--------------------------------------------------------------------|--------------------------------------------------------------------|--------------------------------------------------------------------|-------------------------------------------|--|----------------------------------------------------|
| iiR156d                                  | chr11                          | -                | 5634584                                  | TATA-less            | 5634380                                   | 5634415                             | 5634364                         | 5634353                         | 5631341                             | 5631328                    | 5633903              | nd                   | 5633555<br>5633512<br>5633184<br>5632979<br>5632655<br>5631801                                                                                         | 0.571000<br>0.389000<br>0.370000<br>0.593000<br>0.606000<br>0.328000                                                                                                 | stem                                                          | 5633474<br>5631712<br>5631712<br>5632856<br>5632529<br>5631712                                                                                         | 0.330000<br>0.164000<br>0.164000<br>0.392000<br>0.426000<br>0.164000                                                                                                             | leaf callus<br>leaf callus<br>stem<br>leaf stem<br>leaf callus                                                                                     | 0<br>2<br>1<br>0<br>7<br>2<br>1                                    | 2<br>0<br>0<br>0<br>0<br>17<br>0                                   | 0<br>0<br>0<br>0<br>0<br>1<br>0                                         | 0<br>0<br>0<br>0<br>0<br>1<br>0                                    | 2<br>1<br>3<br>0<br>1<br>10<br>1                                   |                                                                    |                                                                    |                                           |  |                                                    |
| iiR156g                                  | chr17                          | -                | No pred                                  | no                   | 3038168                                   | 3037793                             | nd                              | 3038273                         | 3036995                             | 3037004                    | nd                   | 3037013              | 3038152<br>3037895<br>3037783<br>3037711<br>3037596<br>3037392                                                                                         | 0.355000<br>0.524000<br>0.430000<br>0.555000<br>0.401000<br>0.503000                                                                                                 | stem callus                                                   | 3037280<br>3037280<br>3037280<br>3037280<br>3037280<br>3037280                                                                                         | 0.490000<br>0.490000<br>0.490000<br>0.490000<br>0.490000<br>0.490000                                                                                                             | stem callus<br>stem callus<br>stem callus<br>stem callus<br>stem callus<br>stem callus                                                             | 2<br>1<br>3<br>12<br>1<br>0                                        | 0<br>0<br>1<br>0<br>0<br>4                                         | 0<br>0<br>0<br>0<br>0<br>0                                              | 0<br>1<br>0<br>0<br>0<br>1                                         | 1<br>2<br>2<br>8<br>1<br>4                                         | 2 454 leaf                                                         |                                                                    |                                           |  |                                                    |
| miR156i<br>iiR159c                       | chrUn_random<br>chr17          | +<br>-           | 36776661<br>No pred                      | 36776634<br>no       | 36776678<br>2610336                       | 36776678<br>2610326                 | 36776742<br>2610317             | 36776743<br>2610317             | nd<br>2609123                       | nd<br>2609131              | nd<br>nd             | nd<br>2609196        | 2610173                                                                                                                                                | 0.508000                                                                                                                                                             |                                                               | 2609343                                                                                                                                                | 0.374000                                                                                                                                                                         | leaf stem root                                                                                                                                     | 22                                                                 | 8                                                                  | 0                                                                       | 2                                                                  | 8                                                                  |                                                                    |                                                                    |                                           |  |                                                    |
| iiR160c                                  | chr10                          | -                | 8894350                                  | 8894374              | 8894318                                   | 8894386                             | 8894350                         | 8894371                         | nd                                  | nd                         | nd                   | nd                   | 8893990                                                                                                                                                | 0.577000                                                                                                                                                             |                                                               | 8893881                                                                                                                                                | 0.505000                                                                                                                                                                         | leaf stem root callus                                                                                                                              | 0                                                                  | 3                                                                  | 1                                                                       | 0                                                                  | 4                                                                  |                                                                    |                                                                    |                                           |  |                                                    |
| miR162                                   | chr17                          | +                | 4714318                                  | TATA-less            | 4714680                                   | 4714686                             | 4714687                         | 4714687                         | 4717308                             | 4717340                    | 4717273              | 4717307              | 4716567<br>4715520<br>4715520<br>4715520<br>4715510<br>4715507<br>4715476<br>4715350<br>4714863<br>4714768<br>4714759<br>4714759<br>4714740<br>4714729 | 0.501000<br>0.504000<br>0.504000<br>0.504000<br>0.471000<br>0.501000<br>0.449000<br>0.373000<br>0.390000<br>0.407000<br>0.377000<br>0.377000<br>0.470000<br>0.426000 |                                                               | 4716673<br>4716673<br>4716420<br>4716673<br>4716673<br>4716573<br>4715429<br>4716240<br>4715429<br>4716673<br>4715429<br>4715429<br>4714740<br>4715429 | 0.490000<br>0.490000<br>0.366000<br>0.490000<br>0.490000<br>0.490000<br>0.490000<br>0.481000<br>0.244000<br>0.481000<br>0.490000<br>0.481000<br>0.481000<br>0.481000<br>0.481000 | leaf stem root callus                                                                                                                              | 4<br>0<br>0<br>0<br>0<br>1<br>1<br>3<br>0<br>0<br>0<br>3<br>3<br>3 | 1<br>2<br>1<br>0<br>0<br>0<br>0<br>0<br>1<br>1<br>0<br>3<br>1<br>2 | 0<br>1<br>1<br>0<br>0<br>0<br>0<br>0<br>0<br>0<br>0<br>0<br>0<br>0<br>0 | 0<br>1<br>1<br>0<br>0<br>0<br>0<br>0<br>0<br>1<br>1<br>0<br>0<br>0 | 0<br>2<br>1<br>0<br>0<br>1<br>0<br>0<br>0<br>0<br>0<br>0<br>0<br>0 | 2<br>1<br>1<br>1<br>0<br>0<br>0<br>0<br>0<br>0<br>0<br>0<br>0<br>0 | 0<br>1<br>1<br>0<br>0<br>0<br>0<br>0<br>0<br>1<br>1<br>0<br>0<br>1 | 2<br>3<br>2<br>1<br>1<br>1<br>4<br>5<br>6 |  | RACE STOP: 4717237/4715594/4715751/4717045/4716530 |
| iiR167a<br>iiR167d                       | chr1<br>chr7                   | +<br>-           | No pred<br>845566                        | no<br>845597         | 1563294<br>845542                         | nd<br>845545                        | 1563320<br>nd                   | 1563291<br>nd                   | 1563916<br>844270                   | nd<br>844250               | 1563933<br>nd        | 1563912<br>nd        | 844837                                                                                                                                                 | 0.489000                                                                                                                                                             | leaf                                                          | 844632                                                                                                                                                 | 0.370000                                                                                                                                                                         | stem                                                                                                                                               | 0                                                                  | 1                                                                  | 0                                                                       | 0                                                                  | 1                                                                  |                                                                    |                                                                    |                                           |  |                                                    |
| miR168                                   | chr2                           | -                | 16750258                                 | 16750282             | 16750255                                  | 16750240                            | 16750225                        | 16750239                        | 16747427                            | 16747408                   | nd                   | 16747419             | 16750027<br>16750019<br>16748088                                                                                                                       | 0.467000<br>0.448000<br>0.482000                                                                                                                                     |                                                               | 16748197<br>16748197<br>16747680                                                                                                                       | 0.506000<br>0.506000<br>0.448000                                                                                                                                                 | leaf root<br>leaf root<br>leaf stem callus                                                                                                         | 2<br>4<br>0                                                        | 0<br>8<br>1                                                        | 0<br>1<br>0                                                             | 0<br>5<br>0                                                        | 0<br>1<br>0                                                        | 1<br>5<br>1                                                        | 1 454 berry<br>6 454 berry                                         |                                           |  |                                                    |
| iiR169g<br>iiR171a<br>iiR319c<br>iiR393b | chr8<br>chr14<br>chr2<br>chr13 | +<br>-<br>-<br>+ | No pred<br>No pred<br>No pred<br>No pred | no<br>no<br>no<br>no | 20118544<br>14694238<br>662167<br>4372918 | nd<br>14694267<br>662167<br>4372919 | nd<br>14694292<br>nd<br>nd      | nd<br>14694236<br>nd<br>4373963 | 20119875<br>nd<br>660898<br>4373978 | nd<br>nd<br>nd<br>nd       | nd<br>nd<br>nd<br>nd | nd<br>nd<br>nd<br>nd | 4373255                                                                                                                                                | 0.551000                                                                                                                                                             |                                                               | 4373664                                                                                                                                                | 0.402000                                                                                                                                                                         |                                                                                                                                                    | 1                                                                  | 0                                                                  | 0                                                                       | 0                                                                  | 1                                                                  |                                                                    |                                                                    |                                           |  |                                                    |
| iiR394b                                  | chr18                          | -                | 1386133                                  | TATA-less            | 1386084                                   | 1386013                             | nd                              | nd                              | 1385071                             | 1384873                    | nd                   | nd                   | 1385724                                                                                                                                                | 0.510000                                                                                                                                                             |                                                               | 1385362                                                                                                                                                | 0.467000                                                                                                                                                                         | leaf stem callus                                                                                                                                   | 3                                                                  | 11                                                                 | 0                                                                       | 1                                                                  | 7                                                                  | RACE STOP 1385081/1385085/1385121/1385102/1385108<br>7 RACE        |                                                                    |                                           |  |                                                    |
| iiR396b                                  | chr11                          | +                | No pred                                  | no                   | 5205873                                   | 5205921                             | 5205886                         | 5205883                         | 5208124                             | 5208135                    | 5208011              | 5208094              | 5206245<br>5206451<br>5206513<br>5207688<br>5207750                                                                                                    | 0.545000<br>0.542000<br>0.439000<br>0.409000<br>0.538000                                                                                                             | leaf                                                          | 5206387<br>5207749<br>5207086<br>5207749<br>5207816                                                                                                    | 0.369000<br>0.404000<br>0.171000<br>0.404000<br>0.363000                                                                                                                         | stem callus<br>stem callus<br>leaf<br>leaf                                                                                                         | 3<br>0<br>0<br>0<br>0                                              | 1<br>1<br>0<br>0<br>1                                              | 1<br>0<br>0<br>0<br>0                                                   | 0<br>0<br>0<br>0<br>0                                              | 5<br>2<br>1<br>1<br>1                                              |                                                                    |                                                                    |                                           |  |                                                    |
| iiR397a                                  | chrUn_random                   | +                | No pred                                  | no                   | 85971353                                  | 85971349                            | 85971353                        | 85971342                        | nd                                  | nd                         | nd                   | nd                   | 85971560<br>85972847<br>85973070                                                                                                                       | 0.435000<br>0.571000<br>0.598000                                                                                                                                     |                                                               | 85971702<br>85972917<br>85973212                                                                                                                       | 0.385000<br>0.439000<br>0.454000                                                                                                                                                 | stem root callus<br>stem callus                                                                                                                    | 0<br>0<br>0                                                        | 1<br>5<br>2                                                        | 0<br>0<br>0                                                             | 0<br>40<br>0                                                       | 0<br>11<br>2                                                       |                                                                    |                                                                    |                                           |  |                                                    |
| iiR397b                                  | chrUn_random                   | -                | No pred                                  | no                   | 146568205                                 | 146568210                           | 146568207                       | 146568217                       | nd                                  | nd                         | nd                   | nd                   | 146567996                                                                                                                                              | 0.435000                                                                                                                                                             |                                                               | 146567862                                                                                                                                              | 0.385000                                                                                                                                                                         |                                                                                                                                                    | 0                                                                  | 1                                                                  | 0                                                                       | 2                                                                  | 2                                                                  |                                                                    |                                                                    |                                           |  |                                                    |
| iiR398a                                  | chr1                           | +                | No pred                                  | no                   | 717331                                    | 717187                              | 717264                          | 717248                          | 719184                              | 717198                     | 719188               | 719200               | 717390<br>717390<br>717390<br>717855<br>718282<br>718500                                                                                               | 0.499000<br>0.499000<br>0.499000<br>0.510000<br>0.533000<br>0.479000                                                                                                 |                                                               | 717577<br>717687<br>718148<br>718148<br>718370<br>719049                                                                                               | 0.314000<br>0.351000<br>0.353000<br>0.353000<br>0.390000<br>0.363000                                                                                                             | leaf stem root callus<br>leaf stem root callus | 0<br>0<br>0<br>2<br>2<br>0                                         | 2<br>1<br>1<br>15<br>8<br>0                                        | 1<br>0<br>0<br>2<br>0<br>0                                              | 1<br>0<br>0<br>4<br>4<br>1                                         | 4<br>1<br>1<br>11<br>8<br>1                                        |                                                                    |                                                                    |                                           |  |                                                    |
| iiR398b<br>iiR398c<br>iiR403a            | chr6<br>chr6<br>chr5           | -<br>+<br>-      | No pred<br>No pred<br>1835411            | no<br>no<br>1835441  | 20660773<br>14851851<br>nd                | 20660783<br>14851857<br>1835395     | 20660768<br>14851856<br>1835420 | 20660767<br>14851858<br>1835389 | 20660459<br>14852180<br>nd          | 20660448<br>14852215<br>nd | nd<br>nd<br>nd       | nd<br>14852186<br>nd | 1834959<br>1835273                                                                                                                                     | 0.568000<br>0.431000                                                                                                                                                 |                                                               | 1834086<br>1835195                                                                                                                                     | 0.411000<br>0.349000                                                                                                                                                             |                                                                                                                                                    | 0<br>0                                                             | 4<br>2                                                             | 0<br>0                                                                  | 0<br>0                                                             | 2<br>2                                                             | 2 454 leaf                                                         |                                                                    |                                           |  |                                                    |
| iiR403c                                  | chr5                           | -                | 1302236                                  | 1302265              | 1302234                                   | 1302219                             | 1302219                         | 1302232                         | 1301756                             | 1301756                    | 1301760              | 1301760              | 1302097                                                                                                                                                | 0.365000                                                                                                                                                             |                                                               | 1302012                                                                                                                                                | 0.349000                                                                                                                                                                         |                                                                                                                                                    | 0                                                                  | 2                                                                  | 0                                                                       | 0                                                                  | 2                                                                  |                                                                    |                                                                    |                                           |  |                                                    |
| iiR403e                                  | chr5                           | -                | No pred                                  | no                   | 1738240                                   | 1738247                             | 1738248                         | 1738231                         | nd                                  | nd                         | nd                   | nd                   | 1737325<br>1738206                                                                                                                                     | 0.632000<br>0.568000                                                                                                                                                 |                                                               | 1737240<br>1737402                                                                                                                                     | 0.404000<br>0.303000                                                                                                                                                             |                                                                                                                                                    | 1<br>1                                                             | 2<br>1                                                             | 0<br>1                                                                  | 8<br>1                                                             | 8<br>3                                                             |                                                                    |                                                                    |                                           |  |                                                    |
| miR408                                   | chr7                           | +                | No pred                                  | no                   | 5372904                                   | 5372907                             | 5372907                         | 5372896                         | 5374243                             | 5374226                    | 5374255              | 5374207              | 5373063<br>5373063<br>5373063<br>5373063                                                                                                               | 0.555000<br>0.555000<br>0.555000<br>0.555000                                                                                                                         |                                                               | 5373688<br>5373709<br>5373745<br>5373858                                                                                                               | 0.179000<br>0.261000<br>0.303000<br>0.327000                                                                                                                                     | leaf root<br>root                                                                                                                                  | 2<br>0                                                             | 1<br>0                                                             | 0<br>0                                                                  | 0<br>0                                                             | 2<br>1<br>0<br>2                                                   |                                                                    |                                                                    |                                           |  |                                                    |
| iiR482a                                  | chr17                          | +                | No pred                                  | no                   | 5579315                                   | 5579315                             | 5579315                         | 5579315                         | 5580798                             | 5580493                    | 5580438              | 5581255              | 5579322<br>5579346<br>5579360                                                                                                                          | 0.514000<br>0.367000<br>0.390000                                                                                                                                     | leaf stem root callus<br>leaf stem root callus<br>stem callus | 5579599<br>5579599<br>5579599                                                                                                                          | 0.482000<br>0.482000<br>0.482000                                                                                                                                                 | leaf stem root callus<br>leaf stem root callus<br>leaf stem root callus                                                                            | 1<br>5<br>0                                                        | 0<br>0<br>1                                                        | 0<br>0<br>0                                                             | 0<br>0<br>0                                                        | 1<br>2<br>1                                                        |                                                                    | RACE START: 5579321 RACE STOP: 5580180                             |                                           |  |                                                    |

**Supplemental Figure S5: RNAseq reads Supporting predicted splice junctions for *Vitis vinifera* pri-miRNAs shown in Figure 4**

|               |             |              |               |       |               |                                  |   |
|---------------|-------------|--------------|---------------|-------|---------------|----------------------------------|---|
| Vvi-MIR162    | chr17       | +            | 4716567       |       | 4716673       |                                  |   |
| CCCCAGGCAGCAA | AAATTTAGTGT | TTCCACAGG    | TTGCATTTTTG   | ..... | TTTCTTGAGCAGG | TATCTGGAATCGGAAAGTTGTTTCTTGTTT   |   |
|               | CAA         | AAATTTAGTGT  | TTCCACAG      |       |               | GTATCTGGA                        | 3 |
|               | GCAA        | AAATTTAGTGT  | TTCCACAG      |       |               | GTATCTGG                         | 2 |
| Vvi-MIR162    | chr17       | +            | 4715520       |       | 4716673       |                                  |   |
| GCCAAATTC     | TGCTGAATGT  | AGTAATTTCC   | AGTAAATTTAAT  | ..... | TTTCTTGAGCAGG | TATCTGGAATCGGAAAGTTGTTTCTTGTTT   |   |
|               | CTTGCTGAAT  | GTAGTAATTTCC |               |       |               | GTATCTGGA                        | 1 |
|               | GAATGTAG    | TAATTTCC     |               |       |               | GTATCTGGAATCG                    | 1 |
|               | GCTGAATGT   | AGTAATTTCC   |               |       |               | GTATCTGGAA                       | 2 |
| Vvi-MIR162    | chr17       | +            | 4715520       |       | 4716420       |                                  |   |
| GCCAAATTC     | TGCTGAATGT  | AGTAATTTCC   | AGTAAATTTAAT  | ..... | GTTCTTGAGTAG  | GGGGGATAAAGGCTGCTGGTTTTGCGAAGTGC |   |
|               | TCTTGCTGAAT | GTAGTAATTTCC |               |       |               | GGGGG                            | 1 |
|               | AATGTAG     | TAATTTCC     |               |       |               | GGGGGATAAAGGCTG                  | 1 |
| Vvi-MIR162    | chr17       | +            | 4715510       |       | 4716673       |                                  |   |
| GCATCACAACG   | CCAAATTC    | TGCTGAATGT   | AGTAATTTCCAGT | ..... | TTTCTTGAGCAGG | TATCTGGAATCGGAAAGTTGTTTCTTGTTT   |   |
|               | TCTTGCTGAAT | GTA          |               |       |               | GTATCTGGAATCGGAA                 | 1 |
| Vvi-MIR162    | chr17       | +            | 4715507       |       | 4716673       |                                  |   |
| GTAGCATCACAAC | GCCAAATTC   | TGCTGAATGT   | AGTAATTTCC    | ..... | TTTCTTGAGCAGG | TATCTGGAATCGGAAAGTTGTTTCTTGTTT   |   |
|               | CACAACGCC   | AAATTC       | TGCTGAAT      |       |               | GTATCT                           | 1 |
| Vvi-MIR162    | chr17       | +            | 4715476       |       | 4716673       |                                  |   |
| CTGTGTTCTTCT  | GTGTTTCGAAC | AGACTCTGG    | TAGCATCACAA   | ..... | TTTCTTGAGCAGG | TATCTGGAATCGGAAAGTTGTTTCTTGTTT   |   |
|               | CAGACTCTG   |              |               |       |               | GTATCTGGAATCGGAAAGTTG            | 1 |
| Vvi-MIR162    | chr17       | +            | 4715350       |       | 4715429       |                                  |   |
| AGACCATGTTCA  | CAAATAGTCT  | TGTAAGCTG    | TAAACAGCCTGA  | ..... | AGTTTATTGCAG  | GGAAGGAGATCCGCCCTGTGTTCTTCTGTGT  |   |
|               | AATAGTCT    | TGTAAGCT     |               |       |               | GGAAGGAGATCCG                    | 3 |

|                                             |                |                                             |         |                      |                         |   |
|---------------------------------------------|----------------|---------------------------------------------|---------|----------------------|-------------------------|---|
| Vvi-MIR162                                  | chr17          | +                                           | 4714863 |                      | 4716240                 |   |
| TCATTTGGTCAGATCTGTGGTTTTT                   | GATTTTGTGTTTTT | GAAA                                        | .....   | ACACTCCATAAGGTTTTTTA | ATTGGGTTAACTTCTATTCTCAT |   |
| GTCAGATCTGTGGTTTTT                          | GATTTT         |                                             |         | GTTTTT               |                         | 1 |
| Vvi-MIR162                                  | chr17          | +                                           | 4714768 |                      | 4715429                 |   |
| ATGGTGACCCTTCAGATTCCTGGTTCACGCTGTTACTCTTTCT | .....          | AGTTTATTGCAGGGAAGGAGATCCGCCCTGTGTTCTTCTGTGT |         |                      |                         |   |
| TCCTGGTTCACGCT                              |                | GGAAGGAGATCCGCC                             |         |                      |                         | 1 |
| GATTCCTGGTTCACGCT                           |                | GGAAGGAGATCCG                               |         |                      |                         | 3 |
| Vvi-MIR162                                  | chr17          | +                                           | 4714759 |                      | 4716673                 |   |
| CGTACGGCAATGGTGACCCTTCAGATTCCTGGTTCACGCTGTT | .....          | TTTCTTGAGCAGGTATCTGGAATCGGAAAGTTGTTTCTTGTTT |         |                      |                         |   |
| TCAGATTCCTG                                 |                | GTATCTGGAATCGGAAAGTTG                       |         |                      |                         | 1 |
| Vvi-MIR162                                  | chr17          | +                                           | 4714759 |                      | 4715429                 |   |
| CGTACGGCAATGGTGACCCTTCAGATTCCTGGTTCACGCTGTT | .....          | AGTTTATTGCAGGGAAGGAGATCCGCCCTGTGTTCTTCTGTGT |         |                      |                         |   |
| CAGATTCCTG                                  |                | GGAAGGAGATCCGCCCTGTG                        |         |                      |                         | 2 |
| GACCTTCAGATTCCTG                            |                | GGAAGGAGATCCG                               |         |                      |                         | 3 |
| GTGACCTTCAGATTCCTG                          |                | GGAAGGAGATC                                 |         |                      |                         | 1 |
| TGACCTTCAGATTCCTG                           |                | GGAAGGAGATCC                                |         |                      |                         | 2 |
| Vvi-MIR162                                  | chr17          | +                                           | 4714740 |                      | 4715429                 |   |
| AGAGAGAGAGGGAGAAAAACGTACGGCAATGGTGACCCTTCAG | .....          | AGTTTATTGCAGGGAAGGAGATCCGCCCTGTGTTCTTCTGTGT |         |                      |                         |   |
| GAAAAACGTACGGCAATG                          |                | GGAAGGAGATCC                                |         |                      |                         | 1 |
| CGTACGGCAATG                                |                | GGAAGGAGATCCGCCCTG                          |         |                      |                         | 1 |
| AGAAAAACGTACGGCAATG                         |                | GGAAGGAGATC                                 |         |                      |                         | 2 |
| Vvi-MIR162                                  | chr17          | +                                           | 4714729 |                      | 4715429                 |   |
| ATAGAGAAGGGAGAGAGAGAGGGAGAAAAACGTACGGCAATGG | .....          | AGTTTATTGCAGGGAAGGAGATCCGCCCTGTGTTCTTCTGTGT |         |                      |                         |   |
| GGGAGAGAGAGAGGGAGAAAAAC                     |                | GGAAGGAGA                                   |         |                      |                         | 1 |
| GAAAAAC                                     |                | GGAAGGAGATCCGCCCTGTGTTCT                    |         |                      |                         | 1 |
| GAGAGGGAGAAAAAC                             |                | GGAAGGAGATCCGCC                             |         |                      |                         | 1 |
| AGAGAGAGGGAGAAAAAC                          |                | GGAAGGAGATCC                                |         |                      |                         | 1 |
| GAGAGAGGGAGAAAAAC                           |                | GGAAGGAGATCCG                               |         |                      |                         | 1 |
| GAGAGAGGGAGAAAAAC                           |                | GGAAGGAGATC                                 |         |                      |                         | 1 |

Vvi-MIR168 chr2 - 16750027 16748197  
 ATGTGATGATGAAAGACTACTTCGATCTCAGGTTTCTAGGTTG ..... GCTTGTTTTTCAGGTGCGGGGGCTCAACAAATTTGTTGCAGGGC  
 GAAAGACTACTTCGATCTCAG GTGCGGGGG 2

Vvi-MIR168 chr2 - 16750019 16748197  
 ATGAAAGACTACTTCGATCTCAGGTTTCTAGGTTGAAAAATT ..... GCTTGTTTTTCAGGTGCGGGGGCTCAACAAATTTGTTGCAGGGC  
 CTTCGATCTCAGGTTTCTAG GTGCGGGGGC 5  
 GTTTCTAG GTGCGGGGGCTCAACAAATTTG 3  
 CTA CTACTTCGATCTCAGGTTTCTAG GTGCGGG 4  
 ATCTCAGGTTTCTAG GTGCGGGGGCTCAAC 1  
 GATCTCAGGTTTCTAG GTGCGGGGGCTCAACA 2  
 AGGTTTCTAG GTGCGGGGGCTCAACAAATT 3

Vvi-MIR168 chr2 - 16748088 16747680  
 TCAACCCTAACAATTATTGTCACATGCCAGGTTTCTTGGTAA ..... TTTATTCTGTAGATCATTGTCATGATTGGCCCATTCCTCCTCTCT  
 CATGCCAG ATCATTGTCATGATTGGCCCAT 1

Vvi-MIR394B chr18 - 1385724 1385362  
 CTCTCTCGTCTTCCACTCTAGAGCATCAAGGTGAAAACCCCA ..... CTTGTGTTGCAGGGGTTTCATCAACTCCTCCTCTTTGCCTCTT  
 CTAGAGCATCAAG GGGTTTCATCAACTCCT 1  
 TCTTCCACTCTAGAGCATCAAG GGGTTTCATC 1  
 GAGCATCAAG GGGTTTCATCAACTCCTCCT 2  
 TCCACTCTAGAGCATCAAG GGGTTTCATCA 1  
 CATCAAG GGGTTTCATCAACTCCTCCTCTT 2  
 TTCCACTCTAGAGCATCAAG GGGTTTCATC 5  
 AGAGCATCAAG GGGTTTCATCAACTCCTCC 3
