# Supplementary material for: High throughput approaches reveal splicing of primary microRNA transcripts and tissue specific expression of mature microRNAs in Vitis vinifera
Source: PubMed Central journal article supplement (PMC2822795; doi:10.1186/1471-2164-10-558), 2009-11-25
Supplement: 1471-2164-10-558-S2.pdf [file 1471-2164-10-558-S2.pdf]

**Supplemental Table S6.** Combimatrix microarray spotted probes list.

| Probe Name                                   | Probe Sequence 5'-3'                | Probe Type          |
|----------------------------------------------|-------------------------------------|---------------------|
| vvi tRNA-Ala(Chlor)_12_32 PosCtrl as         | tcagttgtagagctccgctc                | Positive control    |
| vvi tRNA-Phe(Chlor)_48_68 PosCtrl as         | ccagttcaaactctggtcctg               | Positive control    |
| vvi tRNA-Phe(Chlor)_37_57 PosCtrl as         | tcctcgtgtcaccagttcaaa               | Positive control    |
| vvi tRNA-Lys(Chlor)_2_23 PosCtrl as          | ggttgctaactcaatggtagag              | Positive control    |
| vvi tRNA-His(Chlor)_52_72 PosCtrl as         | cgggttcaattcccgtcgttc               | Positive control    |
| vvi tRNA-His(Chlor)_19_39 PosCtrl as         | gatcaaggcagtggtattgga               | Positive control    |
| vvi tRNA-Ser(Chlor)_51_71 PosCtrl as         | agttattcgtaccgagggttc               | Positive control    |
| vvi tRNA-Ser(Chlor)_38_59 PosCtrl as         | aatccgtgtacgagttattcg               | Positive control    |
| vvi tRNA-Tyr(Chlor)_43_63 PosCtrl as         | gttggcaatatgtctacgctg               | Positive control    |
| vvi tRNA-Tyr(Chlor)_4_24 PosCtrl as          | tcgatgcccagcgggctaata               | Positive control    |
| vvi tRNA-Met(Chlor)_48_68 PosCtrl as         | cacgggttcaaactcgtctc                | Positive control    |
| vvi tRNA-Met(Chlor)_33_53 PosCtrl as         | tcataaccttgaggtcacggg               | Positive control    |
| vvi tRNA-Ile(Chlor)_10_30 PosCtrl as         | ctctggttcaagtccaggatg               | Positive control    |
| vvi UBQ(AY684128)_74_94 DegradCtrl as        | acttggtcctccgcctgagag               | Degradation control |
| vvi Act(AY847627)_170_190 DegradCtrl as      | ttgtgcttagtggtgggtcga               | Degradation control |
| vvi Act(AY847627)_144_165 DegradCtrl as      | tatcaggaaggacctctatggc              | Degradation control |
| vvi Hsp101(AY764155)_2888_2908 DegradCtrl as | gcagtgacctgtaattggtct               | Degradation control |
| vvi Hsp101(AY764155)_2660_2680 DegradCtrl as | tcagacgtgttgattcggatc               | Degradation control |
| vvi GDBrPK(AF178575)_1085_1106 DegradCtrl as | gtcagtggcattgattatcaga              | Degradation control |
| vvi GDBrPK(AF178575)_1072_1092 DegradCtrl as | cagtgctgtcatggtcagtg                | Degradation control |
| neg Bio B Spike_394_418 NegCtrl as           | gcgctgagattcaactcaactg              | Negative control    |
| neg Bio C Spike_113_137 NegCtrl as           | acgtgggtgtatttaccgtgtgaa            | Negative control    |
| neg Lambda Spike_12_609_633 NegCtrl as       | cttccggcaatactcgtaaaccata           | Negative control    |
| neg Lambda Spike_5_753_777 NegCtrl as        | gaacaggttatcgaaatcagccaca           | Negative control    |
| neg Lambda Spike_6_497_521 NegCtrl as        | tacaaccggaatgttgacctgct             | Negative control    |
| neg Lambda Spike_8_329_353 NegCtrl as        | gtcacctttatctgccgacctcat            | Negative control    |
| neg Lambda Spike_9_1167_1191 NegCtrl as      | gatgtttgcagacgtaatggtg              | Negative control    |
| QC-oligoB-AS-3                               | gagttgctgttatcatcagcgaatg           | Quality control     |
| QC-3prime                                    | tgactgactggactgtgggtgtgcgatacgtgtcc | Quality control     |

|                   |                                      |                          |
|-------------------|--------------------------------------|--------------------------|
| QC-5prime         | tgggtgtgcgatacgtgtccgactgactgactgac  | Quality control          |
| QC-LLD-1          | agatttcttcggttcccgtgggtggcgtctga     | Quality control          |
| QC-LLD-2          | ggagtatgttcggctgcgcgagactatgatgccg   | Quality control          |
| QC-LLD-3          | gtggcgatgttaacctcggcttatggcgtcaccgg  | Quality control          |
| QC-LLD-4          | cgaacatcccagggtaacacgca              | Quality control          |
| NC-SP-phage-03-3  | caccgtaattactgtgagccatcatgacgccgatg  | Generic negative control |
| NC-SP-phage-03-7  | gacggatgcgcatcgggtctgtaacaagtcat     | Generic negative control |
| NC-SP-phage-03-8  | agtggctgaaacagttgttgattgagtctctttgg  | Generic negative control |
| NC-SP-phage-05-2  | ccatgattaccaggtgtacggacacgaaactcat   | Generic negative control |
| NC-SP-phage-05-1  | ggagacgggcaatcagttcatctttcgtcatggac  | Generic negative control |
| NC-SP-phage-05-16 | cctgtccggcatagctgatatttcagggtcatca   | Generic negative control |
| NC-SP-phage-06-1  | gactctccggattaactggcgggtgacggtaatttc | Generic negative control |
| NC-SP-phage-06-8  | tcatacataccagacagccggtacaccagttttc   | Generic negative control |
| NC-SP-phage-06-14 | gtcacaccgttatgttcaaatgattcggttttcag  | Generic negative control |
| NC-SP-phage-08-9  | gtgaccataccgtacaggttagaaaccgtcagcgt  | Generic negative control |
| NC-SP-phage-08-10 | ggatcggcgttaactgtttccgttgacgaagttcac | Generic negative control |
| NC-SP-phage-08-13 | ggacagaaagcgtcacgctgtacgttttcaggttg  | Generic negative control |
| NC-SP-phage-09-4  | cgaccaaactcgttgaatatccccgtaaaggcagat | Generic negative control |
| NC-SP-phage-09-7  | catcaggcagagtctcatgtaactgcgccgttaac  | Generic negative control |
| NC-SP-phage-09-11 | ctctgggaacaatatgaattacagcgcctcagggc  | Generic negative control |
| NC-SP-phage-12-6  | gttacggttgatttcagttgggtccacttatcgc   | Generic negative control |
| NC-SP-phage-12-14 | ccagtaactggctgaacacaccgttgatgatctgc  | Generic negative control |
| NC-SP-phage-12-15 | catgttctgatacaggttgtaaccagccagtagt   | Generic negative control |
| NC-bacteria-10-7  | gaagaagaatcagggcgacacggctcctcattttg  | Generic negative control |
| NC-bacteria-10-2  | cgagctcaacagcgtccagaataacggtgaaaca   | Generic negative control |
| NC-bacteria-10-5  | catgtatcttgcaaacggcaatcgacaccagctctg | Generic negative control |
| NC-bacteria-9-4   | aaaggagctatgtcgagatttcttcggttcccg    | Generic negative control |
| NC-bacteria-9-9   | gaagctgtcgctaactattcagtcxaaaggagcta  | Generic negative control |
| NC-bacteria-9-11  | gaagtcttcgatgatggatttacgacggtatttca  | Generic negative control |
| NC-bacteria-5-4   | ataacgatgggtggcgtgtaacctcggcttatgg   | Generic negative control |
| NC-bacteria-5-11  | gtaaggagcatcaaaagactgcggctcatcttggg  | Generic negative control |
| NC-bacteria-5-12  | aatgtacaggcgaccagcttgttaacgatgacca   | Generic negative control |
| NC-plant-1        | cctaccgtaggtcgacaatatagatattttgttg   | Generic negative control |
| NC-plant-2        | gcggaagaagttgtcggagcaatcgtcatgggaa   | Generic negative control |

|                                                 |                                     |                                 |
|-------------------------------------------------|-------------------------------------|---------------------------------|
| NC-plant-3                                      | tggtaacagagttcctctaattgtcacagggaac  | Generic negative control        |
| NC-plant-4                                      | agcagatctcaaagattgtaggagacatggacgtc | Generic negative control        |
| NC-plant-5                                      | cagcaagctctagaagttcagaggaggcaggagag | Generic negative control        |
| NC-plant-6                                      | ccaactagcagtagaatcaactatcagcaatggc  | Generic negative control        |
| NC-plant-7                                      | ggaagaagaaatacgcacaagttgtgtcacaatg  | Generic negative control        |
| NC-plant-8                                      | acattcgcaaggaaccgtgagctagaagttatcca | Generic negative control        |
| vvi snRNAU6 nat as                              | tgcgtgtcatccttgcgcagg               | Custom Positive Control         |
| vvi snRNAU6 2mut as                             | tgcgtgtcattcttgcgccagg              | Custom Positive Control         |
| scaffold_2358 + 1257 1330 10-30 tRNA nat as     | cactgccttgatccacttgg                | Custom Positive Control         |
| scaffold_2358 + 1257 1330 10-30 tRNA 2mut as    | cactgtcttgatcaacttgg                | Custom Positive Control         |
| scaffold_105 - 365541 365614 10-30 tRNA nat as  | tagcgtgataaccaactaca                | Custom Positive Control         |
| scaffold_105 - 365541 365614 10-30 tRNA 2mut as | tagcctgataacaaactaca                | Custom Positive Control         |
| scaffold_111 + 86247 86318 10-30 tRNA nat as    | cccaccagcttccgctgcg                 | Custom Positive Control         |
| scaffold_111 + 86247 86318 10-30 tRNA 2mut as   | cccaccaccttcccctgcg                 | Custom Positive Control         |
| scaffold_834 - 23630 23701 10-30 tRNA nat as    | tcagacgcgctaccattgcg                | Custom Positive Control         |
| scaffold_834 - 23630 23701 10-30 tRNA 2mut as   | tcagacgcctacaattgcg                 | Custom Positive Control         |
| vvi miR-1 nat as                                | gtgctccctctcttctgtca                | vvi-miR156a_perfect match probe |
| vvi miR-1 2mut as                               | gtgctctctctcttccgtca                | vvi-miR156a_mismatch probe      |
| vvi miR-2 nat as                                | gtgctcactctcttctgtca                | vvi-miR156b_perfect match probe |
| vvi miR-2 2mut as                               | gtgctccctctcttccgtca                | vvi-miR156b_mismatch probe      |
| vvi miR-3 nat as                                | gtgctcactctctctgtca                 | vvi-miR156e_perfect match probe |
| vvi miR-3 2mut as                               | gtgctccctcttctctgtca                | vvi-miR156e_mismatch probe      |
| vvi miR-4 nat as                                | gtgctctctatcttctgtcaa               | vvi-miR156f_perfect match probe |
| vvi miR-4 2mut as                               | gtgctccctatcttctctcaa               | vvi-miR156f_mismatch probe      |
| vvi miR-5 nat as                                | atgctctctcttcttctgtca               | vvi-miR156h_perfect match probe |
| vvi miR-5 2mut as                               | atgctctccctcttccgtca                | vvi-miR156h_mismatch probe      |
| vvi miR-6 nat as                                | gtgctctctatcttctgtca                | vvi-miR156i_perfect match probe |
| vvi miR-6 2mut as                               | gtgctccctatcttccgtca                | vvi-miR156i_mismatch probe      |
| vvi miR-7 nat as                                | gagagctccctcactccaag                | vvi-miR159a_perfect match probe |
| vvi miR-7 2mut as                               | gagagctctctcacttcaag                | vvi-miR159a_mismatch probe      |
| vvi miR-8 nat as                                | tgagagctccctcactccaag               | vvi-miR159b_perfect match probe |
| vvi miR-8 2mut as                               | tgagagctctctcacttcaag               | vvi-miR159b_mismatch probe      |
| vvi miR-9 nat as                                | tagagctccctcaatcctcaaa              | vvi-miR159c_perfect match probe |
| vvi miR-9 2mut as                               | tagagctctctcaatcctcaaa              | vvi-miR159c_mismatch probe      |

vvi|miR-10|nat|as|  
vvi|miR-10|2mut|as|  
vvi|miR-11|nat|as|  
vvi|miR-11|2mut|as|  
vvi|miR-12|nat|as|  
vvi|miR-12|2mut|as|  
vvi|miR-13|nat|as|  
vvi|miR-13|2mut|as|  
vvi|miR-14|nat|as|  
vvi|miR-14|2mut|as|  
vvi|miR-15|nat|as|  
vvi|miR-15|2mut|as|  
vvi|miR-16|nat|as|  
vvi|miR-16|2mut|as|  
vvi|miR-17|nat|as|  
vvi|miR-17|2mut|as|  
vvi|miR-18|nat|as|  
vvi|miR-18|2mut|as|  
vvi|miR-19|nat|as|  
vvi|miR-19|2mut|as|  
vvi|miR-20|nat|as|  
vvi|miR-20|2mut|as|  
vvi|miR-21|nat|as|  
vvi|miR-21|2mut|as|  
vvi|miR-22|nat|as|  
vvi|miR-22|2mut|as|  
vvi|miR-23|nat|as|  
vvi|miR-23|2mut|as|  
vvi|miR-24|nat|as|  
vvi|miR-24|2mut|as|  
vvi|miR-25|nat|as|  
vvi|miR-25|2mut|as|  
vvi|miR-26|nat|as|  
vvi|miR-26|2mut|as|

tggcattcagggagccaggca  
tggcattcagtgagtcaggca  
tggcatacagggagccaggca  
tggcatacagtgagtcaggca  
ctggatgcagaggttatcga  
ctggatgaagagcttatcga  
tgcacgtgccctgcttcca  
tgcacgtgtcctccttcca  
agcatgtgccctgcttcca  
agcatgtgtcctccttcca  
gggggaatgaagcctggtccga  
ggggaaatgaagtctggtccga  
aggggaatgaagcctggtccga  
agggaaatgaagtctggtccga  
caggaatgaagcctggtccga  
caggaatgaactctggtccga  
gaggaatgaagcctggtccga  
gaggaatgaactctggtccga  
cagatcatgctggcagcttca  
cagatcatcctgccagcttca  
tagatcatgctggcagcttca  
tagatcatcctgccagcttca  
agatcatgctggcagcttca  
agatcatcctgccagcttca  
ttccgacctgaccaagcga  
ttccagacctgaaccaagcga  
cggcaagtcaccttgctg  
cgggaaagtcaccttcgctg  
taggcaagtcaccttcgcta  
taggaaagtcaccttagcta  
cggcaagccatccttgctca  
cggcaagtcaccttgctca  
cggcaaatcattcttgctg  
cgggaaatcattcttcgctg

vvi-miR160a\_perfect match probe  
vvi-miR160a\_mismatch probe  
vvi-miR160c\_perfect match probe  
vvi-miR160c\_mismatch probe  
vvi-miR162\_perfect match probe  
vvi-miR162\_mismatch probe  
vvi-miR164a\_perfect match probe  
vvi-miR164a\_mismatch probe  
vvi-miR164b\_perfect match probe  
vvi-miR164b\_mismatch probe  
vvi-miR166c\_perfect match probe  
vvi-miR166c\_mismatch probe  
vvi-miR166d\_perfect match probe  
vvi-miR166d\_mismatch probe  
vvi-miR166a\_perfect match probe  
vvi-miR166a\_mismatch probe  
vvi-miR166b\_perfect match probe  
vvi-miR166b\_mismatch probe  
vvi-miR167a\_perfect match probe  
vvi-miR167a\_mismatch probe  
vvi-miR167b\_perfect match probe  
vvi-miR167b\_mismatch probe  
vvi-miR167c\_perfect match probe  
vvi-miR167c\_mismatch probe  
vvi-miR168\_perfect match probe  
vvi-miR168\_mismatch probe  
vvi-miR169a\_perfect match probe  
vvi-miR169a\_mismatch probe  
vvi-miR169y\_perfect match probe  
vvi-miR169y\_mismatch probe  
vvi-miR169b\_perfect match probe  
vvi-miR169b\_mismatch probe  
vvi-miR169d\_perfect match probe  
vvi-miR169d\_mismatch probe

vvi|miR-27|nat|as|  
vvi|miR-27|2mut|as|  
vvi|miR-28|nat|as|  
vvi|miR-28|2mut|as|  
vvi|miR-29|nat|as|  
vvi|miR-29|2mut|as|  
vvi|miR-30|nat|as|  
vvi|miR-30|2mut|as|  
vvi|miR-31|nat|as|  
vvi|miR-31|2mut|as|  
vvi|miR-32|nat|as|  
vvi|miR-32|2mut|as|  
vvi|miR-33|nat|as|  
vvi|miR-33|2mut|as|  
vvi|miR-34|nat|as|  
vvi|miR-34|2mut|as|  
vvi|miR-35|nat|as|  
vvi|miR-35|2mut|as|  
vvi|miR-36|nat|as|  
vvi|miR-36|2mut|as|  
vvi|miR-37|nat|as|  
vvi|miR-37|2mut|as|  
vvi|miR-38|nat|as|  
vvi|miR-38|2mut|as|  
vvi|miR-39|nat|as|  
vvi|miR-39|2mut|as|  
vvi|miR-40|nat|as|  
vvi|miR-40|2mut|as|  
vvi|miR-41|nat|as|  
vvi|miR-41|2mut|as|  
vvi|miR-42|nat|as|  
vvi|miR-42|2mut|as|  
vvi|miR-43|nat|as|  
vvi|miR-43|2mut|as|

caggcaagtcaccttggtc  
caggaaagtcaccttcgcta  
tcggcaagtcaccttggtc  
tcggaaagtcaccttcgcta  
ggcaagtcaccttggtc  
ggcaagccaccttcgcta  
acggccagtcaccttggtc  
acggtcagtcaccttcgcta  
acggcaagtcaccttggtc  
acggaaagtcaccttcgcta  
cggcaagtcaccttggtc  
cggaaagtcaccttcgcta  
cggcaagtcaccttggtc  
cggaaagtcaccttcgcta  
cggcaagtcaccttggtc  
cggaaagtcaccttcgcta  
cggcaagtcaccttggtc  
cggcaagccattcttgactca  
cggcaagtcaccttgactcg  
cggcaagccattcttgactcg  
cggcaattcactcttggtc  
cggaaattcactcttcgcta  
taggcaagtcaccttggtc  
taggaaagtcaccttcgcta  
cgtgatgtgggacggctcaa  
cgtgatgtgtgacgcctcaa  
gatattgacggctcaatca  
gatattgacgagcctcaatca  
cgtgatattggcaggctcaa  
cgtgatattgccagcctcaa  
gatattggcggctcaatca  
gatattggcgagcctcaatca  
agtgatattggcggctcaa  
agtgatattcccaggctcaa  
ggtgatattggttcggctcaa  
ggtgatattcgttcgctcaa

vvi-miR169e\_perfect match probe  
vvi-miR169e\_mismatch probe  
vvi-miR169f\_perfect match probe  
vvi-miR169f\_mismatch probe  
vvi-miR169g\_perfect match probe  
vvi-miR169g\_mismatch probe  
vvi-miR169i\_perfect match probe  
vvi-miR169i\_mismatch probe  
vvi-miR169l\_perfect match probe  
vvi-miR169l\_mismatch probe  
vvi-miR169m\_perfect match probe  
vvi-miR169m\_mismatch probe  
vvi-miR169o\_perfect match probe  
vvi-miR169o\_mismatch probe  
vvi-miR169r\_perfect match probe  
vvi-miR169r\_mismatch probe  
vvi-miR169s\_perfect match probe  
vvi-miR169s\_mismatch probe  
vvi-miR169v\_perfect match probe  
vvi-miR169v\_mismatch probe  
vvi-miR169x\_perfect match probe  
vvi-miR169x\_mismatch probe  
vvi-miR171a\_perfect match probe  
vvi-miR171a\_mismatch probe  
vvi-miR171b\_perfect match probe  
vvi-miR171b\_mismatch probe  
vvi-miR171c\_perfect match probe  
vvi-miR171c\_mismatch probe  
vvi-miR171e\_perfect match probe  
vvi-miR171e\_mismatch probe  
vvi-miR171f\_perfect match probe  
vvi-miR171f\_mismatch probe  
vvi-miR171g\_perfect match probe  
vvi-miR171g\_mismatch probe

vvi|miR-44|nat|as|  
vvi|miR-44|2mut|as|  
vvi|miR-45|nat|as|  
vvi|miR-45|2mut|as|  
vvi|miR-46|nat|as|  
vvi|miR-46|2mut|as|  
vvi|miR-47|nat|as|  
vvi|miR-47|2mut|as|  
vvi|miR-48|nat|as|  
vvi|miR-48|2mut|as|  
vvi|miR-49|nat|as|  
vvi|miR-49|2mut|as|  
vvi|miR-50|nat|as|  
vvi|miR-50|2mut|as|  
vvi|miR-51|nat|as|  
vvi|miR-51|2mut|as|  
vvi|miR-52|nat|as|  
vvi|miR-52|2mut|as|  
vvi|miR-53|nat|as|  
vvi|miR-53|2mut|as|  
vvi|miR-54|nat|as|  
vvi|miR-54|2mut|as|  
vvi|miR-55|nat|as|  
vvi|miR-55|2mut|as|  
vvi|miR-56|nat|as|  
vvi|miR-56|2mut|as|  
vvi|miR-57|nat|as|  
vvi|miR-57|2mut|as|  
vvi|miR-58|nat|as|  
vvi|miR-58|2mut|as|  
vvi|miR-59|nat|as|  
vvi|miR-59|2mut|as|  
vvi|miR-60|nat|as|  
vvi|miR-60|2mut|as|

gatattggcgcggctcaacca  
gatattggcgagcctcaacca  
gatgatattggcacggctcaa  
gatgatattgccacgcctcaa  
atgtagcatcatcaagattca  
atgtagaatcataaagattca  
gtgtagcatcatcaagattca  
gtgtagaatcataaagattca  
ctgcagcatcatcaagattcc  
ctgcagaatcataaagattcc  
atgcagcatcatcaagattct  
atgcagaatcataaagattct  
gggagctcccttcagtccaag  
gggagctctcttcagttcaag  
aggagctcccttcagtccaaa  
aggagctctcttcagttcaaa  
gggagctcccttcagtccaat  
gggagctctcttcagttcaat  
ggcgctatecctcctgagctt  
ggcgctatctcttgagctt  
ggatcaatgcatcccttggga  
ggatcaatgagatctcttggga  
ggaggtggacagaatgccaa  
ggaggtgcagagaatcccaa  
gagttccccaaacacttcag  
gagttcctcaaacccttcag  
gagttcctccagactcttcag  
gagttcctcaagcctcttcag  
aagctcaagaaagctgtgggag  
aagctaaagaaagttgtgggag  
aagttcaagaaagctgtgggaa  
aagttaaagaaagttgtgggaa  
cagttcaagaaagctgtggaa  
cagttaaagaaagttgtggaa

vvi-miR171h\_perfect match probe  
vvi-miR171h\_mismatch probe  
vvi-miR171i\_perfect match probe  
vvi-miR171i\_mismatch probe  
vvi-miR172a\_perfect match probe  
vvi-miR172a\_mismatch probe  
vvi-miR172b\_perfect match probe  
vvi-miR172b\_mismatch probe  
vvi-miR172c\_perfect match probe  
vvi-miR172c\_mismatch probe  
vvi-miR172d\_perfect match probe  
vvi-miR172d\_mismatch probe  
vvi-miR319b\_perfect match probe  
vvi-miR319b\_mismatch probe  
vvi-miR319e\_perfect match probe  
vvi-miR319e\_mismatch probe  
vvi-miR319g\_perfect match probe  
vvi-miR319g\_mismatch probe  
vvi-miR390\_perfect match probe  
vvi-miR390\_mismatch probe  
vvi-miR393a\_perfect match probe  
vvi-miR393a\_mismatch probe  
vvi-miR394a\_perfect match probe  
vvi-miR394a\_mismatch probe  
vvi-miR395a\_perfect match probe  
vvi-miR395a\_mismatch probe  
vvi-miR395n\_perfect match probe  
vvi-miR395n\_mismatch probe  
vvi-miR396a\_perfect match probe  
vvi-miR396a\_mismatch probe  
vvi-miR396b\_perfect match probe  
vvi-miR396b\_mismatch probe  
vvi-miR396c\_perfect match probe  
vvi-miR396c\_mismatch probe

vvi|miR-61|nat|as|  
vvi|miR-61|2mut|as|  
vvi|miR-62|nat|as|  
vvi|miR-62|2mut|as|  
vvi|miR-63|nat|as|  
vvi|miR-63|2mut|as|  
vvi|miR-64|nat|as|  
vvi|miR-64|2mut|as|  
vvi|miR-65|nat|as|  
vvi|miR-65|2mut|as|  
vvi|miR-66|nat|as|  
vvi|miR-66|2mut|as|  
vvi|miR-67|nat|as|  
vvi|miR-67|2mut|as|  
vvi|miR-68|nat|as|  
vvi|miR-68|2mut|as|  
vvi|miR-69|nat|as|  
vvi|miR-69|2mut|as|  
vvi|miR-70|nat|as|  
vvi|miR-70|2mut|as|  
vvi|miR-71|nat|as|  
vvi|miR-71|2mut|as|  
vvi|miR-72|nat|as|  
vvi|miR-72|2mut|as|  
vvi|miR-73|nat|as|  
vvi|miR-73|2mut|as|  
vvi|miR-74|nat|as|  
vvi|miR-74|2mut|as|  
vvi|miR-75|nat|as|  
vvi|miR-75|2mut|as|  
vvi|miR-76|nat|as|  
vvi|miR-76|2mut|as|  
vvi|miR-77|nat|as|  
vvi|miR-77|2mut|as|

catcaacgctgactcaatga  
catcaaccctgaactcaatga  
aaggggtgacctgagaacaca  
aaggtgtgacctgagaacaca  
caggggacacctgagaacaca  
caggggagacctgagaacaca  
cagggcaattctctttggca  
caggccaattctctttggca  
cagggcaactctctttggca  
caggccaactctctttggca  
acgagcaaactctctttggca  
acgagaaaactctctttggca  
ccgggcaaactctctttggca  
ccggccaactctctttggca  
caggacaaactctctcgga  
caggaaaaactctcttaggca  
aggggcaaactctctttggca  
agggccaaactctctttggca  
cagggcaactctctttggcg  
caggccaactctctttggcg  
cgagtttgctgactgaatctaa  
cgagtttgactgaatctaa  
gccagggaagaggcagtgcat  
gccagtgagagccagtgcat  
ttggaagcctttgaggagat  
ttggaagtctttgagtgagat  
gatgagccgaaccaataaccaca  
gatgagtcgaacaaataaccaca  
ggaatgggaggagtagg  
ggaatgtgagaagtagg  
agcgtgctctctctctgttca  
agcgtctctctctctctgtca  
tggaatactcattgagcaaga  
tggaatactaattgagaaaga

vvi-miR397a\_perfect match probe  
vvi-miR397a\_mismatch probe  
vvi-miR398a\_perfect match probe  
vvi-miR398a\_mismatch probe  
vvi-miR398b\_perfect match probe  
vvi-miR398b\_mismatch probe  
vvi-miR399a\_perfect match probe  
vvi-miR399a\_mismatch probe  
vvi-miR399b\_perfect match probe  
vvi-miR399b\_mismatch probe  
vvi-miR399d\_perfect match probe  
vvi-miR399d\_mismatch probe  
vvi-miR399e\_perfect match probe  
vvi-miR399e\_mismatch probe  
vvi-miR399f\_perfect match probe  
vvi-miR399f\_mismatch probe  
vvi-miR399g\_perfect match probe  
vvi-miR399g\_mismatch probe  
vvi-miR399i\_perfect match probe  
vvi-miR399i\_mismatch probe  
vvi-miR403a\_perfect match probe  
vvi-miR403a\_mismatch probe  
vvi-miR408\_perfect match probe  
vvi-miR408\_mismatch probe  
vvi-miR477a\_perfect match probe  
vvi-miR477a\_mismatch probe  
vvi-miR479\_perfect match probe  
vvi-miR479\_mismatch probe  
vvi-miR482a\_perfect match probe  
vvi-miR482a\_mismatch probe  
vvi-miR535a\_perfect match probe  
vvi-miR535a\_mismatch probe  
vvi-miR828a\_perfect match probe  
vvi-miR828a\_mismatch probe

vvi|miR-78|nat|as|  
vvi|miR-78|2mut|as|  
vvi|miR-79|nat|as|  
vvi|miR-79|2mut|as|  
vvi|miR-80|nat|as|  
vvi|miR-80|2mut|as|  
vvi|miR-81|nat|as|  
vvi|miR-81|2mut|as|  
vvi|miR-82|nat|as|  
vvi|miR-82|2mut|as|  
vvi|miR-83|nat|as|  
vvi|miR-83|2mut|as|  
vvi|miR-84|nat|as|  
vvi|miR-84|2mut|as|  
vvi|miR-85|nat|as|  
vvi|miR-85|2mut|as|  
vvi|miR-86|nat|as|  
vvi|miR-86|2mut|as|  
vvi|miR-87|nat|as|  
vvi|miR-87|2mut|as|  
vvi|miR-88|nat|as|  
vvi|miR-88|2mut|as|  
vvi|miR-89|nat|as|  
vvi|miR-89|2mut|as|  
vvi|miR-90|nat|as|  
vvi|miR-90|2mut|as|  
vvi|miR-91|nat|as|  
vvi|miR-91|2mut|as|  
vvi|miR-92|nat|as|  
vvi|miR-92|2mut|as|  
vvi|miR-93|nat|as|  
vvi|miR-93|2mut|as|  
vvi|miR-94|nat|as|  
vvi|miR-94|2mut|as|

tggaacactcatttgagcaaga  
tggaaccctcattgagaaaga  
tatcaattggtatcagagcta  
tatcaattcgtatccgagcta  
catcaattggtatcagagcct  
catcaattcgtatccgagcct  
catcaattggtatcagagcca  
catcaattcgtatccgagcca  
ccctctcttctgcaacata  
ccctcccttctcaacata  
gggttgctcctctcttc  
gggttgctcctctctcttc  
cactctcttctgcagttt  
cactcccttctcagttt  
tctgtgtcctcactctcttc  
tctgtgtcctcctctcttc  
cactctcttctgtcacctat  
cactcccttctgtcatctat  
catgtgtgctcactctcttc  
catgtgtcctcctctcttc  
cactctcttctgtcagctc  
cactcccttctcagctc  
tgcattgtcctcactctcttc  
tgcattgtcctcctctcttc  
cactctcctctgtcacctac  
cactcttctctgtcatctac  
catgagtgtcactctcctc  
catgagtctcctctcctc  
tctatcttctgcaacagaa  
tctatcttccgtcaaaagaa  
cagttgtgctctctatcttc  
cagttgtcctcctatcttc  
tctatcttctgcaacaaca  
tctatcttccgtcaaaaaca

vvi-miR828b\_perfect match probe  
vvi-miR828b\_mismatch probe  
vvi-miR845a\_perfect match probe  
vvi-miR845a\_mismatch probe  
vvi-miR845c\_perfect match probe  
vvi-miR845c\_mismatch probe  
vvi-miR845d\_perfect match probe  
vvi-miR845d\_mismatch probe  
vvi-miR156a|-5\_perfect match probe  
vvi-miR156a|-5\_mismatch probe  
vvi-miR156a|+5\_perfect match probe  
vvi-miR156a|+5\_mismatch probe  
vvi-miR156b|-5\_perfect match probe  
vvi-miR156b|-5\_mismatch probe  
vvi-miR156b|+5\_perfect match probe  
vvi-miR156b|+5\_mismatch probe  
vvi-miR156c|-5\_perfect match probe  
vvi-miR156c|-5\_mismatch probe  
vvi-miR156c|+5\_perfect match probe  
vvi-miR156c|+5\_mismatch probe  
vvi-miR156d|-5\_perfect match probe  
vvi-miR156d|-5\_mismatch probe  
vvi-miR156d|+5\_perfect match probe  
vvi-miR156d|+5\_mismatch probe  
vvi-miR156e|-5\_perfect match probe  
vvi-miR156e|-5\_mismatch probe  
vvi-miR156e|+5\_perfect match probe  
vvi-miR156e|+5\_mismatch probe  
vvi-miR156f|-5\_perfect match probe  
vvi-miR156f|-5\_mismatch probe  
vvi-miR156f|+5\_perfect match probe  
vvi-miR156f|+5\_mismatch probe  
vvi-miR156g|-5\_perfect match probe  
vvi-miR156g|-5\_mismatch probe

vvi|miR-95|nat|as|  
vvi|miR-95|2mut|as|  
vvi|miR-96|nat|as|  
vvi|miR-96|2mut|as|  
vvi|miR-97|nat|as|  
vvi|miR-97|2mut|as|  
vvi|miR-98|nat|as|  
vvi|miR-98|2mut|as|  
vvi|miR-99|nat|as|  
vvi|miR-99|2mut|as|  
vvi|miR-100|nat|as|  
vvi|miR-100|2mut|as|  
vvi|miR-101|nat|as|  
vvi|miR-101|2mut|as|  
vvi|miR-102|nat|as|  
vvi|miR-102|2mut|as|  
vvi|miR-103|nat|as|  
vvi|miR-103|2mut|as|  
vvi|miR-104|nat|as|  
vvi|miR-104|2mut|as|  
vvi|miR-105|nat|as|  
vvi|miR-105|2mut|as|  
vvi|miR-106|nat|as|  
vvi|miR-106|2mut|as|  
vvi|miR-107|nat|as|  
vvi|miR-107|2mut|as|  
vvi|miR-108|nat|as|  
vvi|miR-108|2mut|as|  
vvi|miR-109|nat|as|  
vvi|miR-109|2mut|as|  
vvi|miR-110|nat|as|  
vvi|miR-110|2mut|as|  
vvi|miR-111|nat|as|  
vvi|miR-111|2mut|as|

catctgtctctctatcttc  
catctgtcctccctatcttc  
ctctctctctgtcattgtg  
ctctcccttctctcattgtg  
ccagcatgctctctctcttc  
ccagcatcctctctcccttc  
ctctatcttctgtcaacaac  
ctctatcttttctcaacaac  
catctgtgctctctatcttc  
catctgtcctccctatcttc  
tcccttcaactccaagccag  
tcccttccctccaagcccag  
gttatgagagctcccttcac  
gttatgagacctctcttcac  
tcccttcaactccaagccag  
tcccttccctccaagcccag  
ggttatgagagctcccttca  
ggttataagagctctcttca  
tcccttcaatccaacaag  
tcccttaaatcaaaacaag  
aggtgtagagctcccttcaa  
aggtgtagacctctcttcaa  
tcagggagccaggcagatca  
tcagggagtcagccagatca  
ttagatggcattcagggagc  
ttagatgccattcagtgagc  
tcagggagccaggcagaaca  
tcagggagtcagccagaaca  
ttagatggcattcagggagc  
ttagatgccattcagtgagc  
acagggagccaggcacaacc  
acagggagtcagccacaacc  
acgtgtggcatacagggagc  
acgtgtgccatacagtgagc

vvi-miR156g|+5\_perfect match probe  
vvi-miR156g|+5\_mismatch probe  
vvi-miR156h|-5\_perfect match probe  
vvi-miR156h|-5\_mismatch probe  
vvi-miR156h|+5\_perfect match probe  
vvi-miR156h|+5\_mismatch probe  
vvi-miR156i|-5\_perfect match probe  
vvi-miR156i|-5\_mismatch probe  
vvi-miR156i|+5\_perfect match probe  
vvi-miR156i|+5\_mismatch probe  
vvi-miR159a|-5\_perfect match probe  
vvi-miR159a|-5\_mismatch probe  
vvi-miR159a|+5\_perfect match probe  
vvi-miR159a|+5\_mismatch probe  
vvi-miR159b|-5\_perfect match probe  
vvi-miR159b|-5\_mismatch probe  
vvi-miR159b|+5\_perfect match probe  
vvi-miR159b|+5\_mismatch probe  
vvi-miR159c|-5\_perfect match probe  
vvi-miR159c|-5\_mismatch probe  
vvi-miR159c|+5\_perfect match probe  
vvi-miR159c|+5\_mismatch probe  
vvi-miR160a|-5\_perfect match probe  
vvi-miR160a|-5\_mismatch probe  
vvi-miR160a|+5\_perfect match probe  
vvi-miR160a|+5\_mismatch probe  
vvi-miR160b|-5\_perfect match probe  
vvi-miR160b|-5\_mismatch probe  
vvi-miR160b|+5\_perfect match probe  
vvi-miR160b|+5\_mismatch probe  
vvi-miR160c|-5\_perfect match probe  
vvi-miR160c|-5\_mismatch probe  
vvi-miR160c|+5\_perfect match probe  
vvi-miR160c|+5\_mismatch probe

vvi|miR-112|nat|as|  
vvi|miR-112|2mut|as|  
vvi|miR-113|nat|as|  
vvi|miR-113|2mut|as|  
vvi|miR-114|nat|as|  
vvi|miR-114|2mut|as|  
vvi|miR-115|nat|as|  
vvi|miR-115|2mut|as|  
vvi|miR-116|nat|as|  
vvi|miR-116|2mut|as|  
vvi|miR-117|nat|as|  
vvi|miR-117|2mut|as|  
vvi|miR-118|nat|as|  
vvi|miR-118|2mut|as|  
vvi|miR-119|nat|as|  
vvi|miR-119|2mut|as|  
vvi|miR-120|nat|as|  
vvi|miR-120|2mut|as|  
vvi|miR-121|nat|as|  
vvi|miR-121|2mut|as|  
vvi|miR-122|nat|as|  
vvi|miR-122|2mut|as|  
vvi|miR-123|nat|as|  
vvi|miR-123|2mut|as|  
vvi|miR-124|nat|as|  
vvi|miR-124|2mut|as|  
vvi|miR-125|nat|as|  
vvi|miR-125|2mut|as|  
vvi|miR-126|nat|as|  
vvi|miR-126|2mut|as|  
vvi|miR-127|nat|as|  
vvi|miR-127|2mut|as|  
vvi|miR-128|nat|as|  
vvi|miR-128|2mut|as|

acagggagccaggcatgtaa  
acagggagtcagccatgtaa  
gcaaatggcatacagggagc  
gcaaatgccatacagtgagc  
tcagggagccaggcagaaca  
tcagggagtcagccagaaca  
ttagatggcattcagggagc  
ttagatgccattcagtgagc  
acagggagccaggcatatat  
acagggagtcagccatatat  
gcaaatggcatacagggagc  
gcaaatgccatacagtgagc  
gcagaggttatcgaccgat  
gcagagctttatagaccgat  
gaacgctggatgcagaggtt  
gaaccctggatgaagaggtt  
tgccctgcttctcaacaag  
tgccctccttctcaacaag  
aatctgcacgtgccctgct  
aatctgaacgtgtcctgct  
tgccctgcttctccagcatg  
tgccctccttctccaccatg  
gatccagcatgtgccctgct  
gatccagaatgtgtcctgct  
tgccctgcttctccatcaag  
tgccctccttctcaatcaag  
tgaactgcacgtgccctgct  
tgaactgaacgtgtcctgct  
tgaagcctggtccgacgaca  
tgaagtctggtcagacgaca  
aattggggggaatgaagcct  
aattggggtgaataaagcct  
tgaagcctggtccgagggca  
tgaagtctggtcagagggca

vvi-miR160d|-5\_perfect match probe  
vvi-miR160d|-5\_mismatch probe  
vvi-miR160d|+5\_perfect match probe  
vvi-miR160d|+5\_mismatch probe  
vvi-miR160e|-5\_perfect match probe  
vvi-miR160e|-5\_mismatch probe  
vvi-miR160e|+5\_perfect match probe  
vvi-miR160e|+5\_mismatch probe  
vvi-miR160f|-5\_perfect match probe  
vvi-miR160f|-5\_mismatch probe  
vvi-miR160f|+5\_perfect match probe  
vvi-miR160f|+5\_mismatch probe  
vvi-miR162|-5\_perfect match probe  
vvi-miR162|-5\_mismatch probe  
vvi-miR162|+5\_perfect match probe  
vvi-miR162|+5\_mismatch probe  
vvi-miR164a|-5\_perfect match probe  
vvi-miR164a|-5\_mismatch probe  
vvi-miR164a|+5\_perfect match probe  
vvi-miR164a|+5\_mismatch probe  
vvi-miR164b|-5\_perfect match probe  
vvi-miR164b|-5\_mismatch probe  
vvi-miR164b|+5\_perfect match probe  
vvi-miR164b|+5\_mismatch probe  
vvi-miR164d|-5\_perfect match probe  
vvi-miR164d|-5\_mismatch probe  
vvi-miR164d|+5\_perfect match probe  
vvi-miR164d|+5\_mismatch probe  
vvi-miR166c|-5\_perfect match probe  
vvi-miR166c|-5\_mismatch probe  
vvi-miR166c|+5\_perfect match probe  
vvi-miR166c|+5\_mismatch probe  
vvi-miR166d|-5\_perfect match probe  
vvi-miR166d|-5\_mismatch probe

vvi|miR-129|nat|as|  
vvi|miR-129|2mut|as|  
vvi|miR-130|nat|as|  
vvi|miR-130|2mut|as|  
vvi|miR-131|nat|as|  
vvi|miR-131|2mut|as|  
vvi|miR-132|nat|as|  
vvi|miR-132|2mut|as|  
vvi|miR-133|nat|as|  
vvi|miR-133|2mut|as|  
vvi|miR-134|nat|as|  
vvi|miR-134|2mut|as|  
vvi|miR-135|nat|as|  
vvi|miR-135|2mut|as|  
vvi|miR-136|nat|as|  
vvi|miR-136|2mut|as|  
vvi|miR-137|nat|as|  
vvi|miR-137|2mut|as|  
vvi|miR-138|nat|as|  
vvi|miR-138|2mut|as|  
vvi|miR-139|nat|as|  
vvi|miR-139|2mut|as|  
vvi|miR-140|nat|as|  
vvi|miR-140|2mut|as|  
vvi|miR-141|nat|as|  
vvi|miR-141|2mut|as|  
vvi|miR-142|nat|as|  
vvi|miR-142|2mut|as|  
vvi|miR-143|nat|as|  
vvi|miR-143|2mut|as|  
vvi|miR-144|nat|as|  
vvi|miR-144|2mut|as|  
vvi|miR-145|nat|as|  
vvi|miR-145|2mut|as|

gattgaggggaatgaagcct  
gattgaggtgaataaagcct  
tgaagcctggtccgacgaca  
tgaagtctggtcagacgaca  
aattggggggaatgaagcct  
aattggggtgaataaagcct  
tgaagcctggtccgaagcct  
tgaagtctggtcagaagcct  
tggtgaggggaatgaagcct  
tggtgaggtgaataaagcct  
tgaagcctggtccgaaatca  
tgaagtctggtcagaaatca  
ggttgaggggaatgaagcct  
ggttgaggtgaataaagcct  
tgaagcctggtccgagatca  
tgaagtctggtcagagatca  
agttggggggaatgaagcct  
agttggggtgaataaagcct  
tgaagcctggtccgagatca  
tgaagtctggtcagagatca  
ggtgtcaggaatgaagcctg  
ggtgtcagaaatgaaccctg  
tgaagcctggtccgacacct  
tgaagtctggtcagacacct  
tttgagaggaatgaagcctg  
tttgagagaaatgaaccctg  
atgctggcagcttcaacctc  
atgctgccagtttcaacctc  
ttcaccagatcatgctggca  
ttcacaagatcatctggca  
atgctggcagcttcaactgc  
atgctgccagtttcaactgc  
aagcttagatcatgctggca  
aagcttacatcatctggca

vvi-miR166d|+5\_perfect match probe  
vvi-miR166d|+5\_mismatch probe  
vvi-miR166e|-5\_perfect match probe  
vvi-miR166e|-5\_mismatch probe  
vvi-miR166e|+5\_perfect match probe  
vvi-miR166e|+5\_mismatch probe  
vvi-miR166f|-5\_perfect match probe  
vvi-miR166f|-5\_mismatch probe  
vvi-miR166f|+5\_perfect match probe  
vvi-miR166f|+5\_mismatch probe  
vvi-miR166g|-5\_perfect match probe  
vvi-miR166g|-5\_mismatch probe  
vvi-miR166g|+5\_perfect match probe  
vvi-miR166g|+5\_mismatch probe  
vvi-miR166h|-5\_perfect match probe  
vvi-miR166h|-5\_mismatch probe  
vvi-miR166h|+5\_perfect match probe  
vvi-miR166h|+5\_mismatch probe  
vvi-miR166a|-5\_perfect match probe  
vvi-miR166a|-5\_mismatch probe  
vvi-miR166a|+5\_perfect match probe  
vvi-miR166a|+5\_mismatch probe  
vvi-miR166b|-5\_perfect match probe  
vvi-miR166b|-5\_mismatch probe  
vvi-miR166b|+5\_perfect match probe  
vvi-miR166b|+5\_mismatch probe  
vvi-miR167a|-5\_perfect match probe  
vvi-miR167a|-5\_mismatch probe  
vvi-miR167a|+5\_perfect match probe  
vvi-miR167a|+5\_mismatch probe  
vvi-miR167b|-5\_perfect match probe  
vvi-miR167b|-5\_mismatch probe  
vvi-miR167b|+5\_perfect match probe  
vvi-miR167b|+5\_mismatch probe

vvi|miR-146|nat|as|  
vvi|miR-146|2mut|as|  
vvi|miR-147|nat|as|  
vvi|miR-147|2mut|as|  
vvi|miR-148|nat|as|  
vvi|miR-148|2mut|as|  
vvi|miR-149|nat|as|  
vvi|miR-149|2mut|as|  
vvi|miR-150|nat|as|  
vvi|miR-150|2mut|as|  
vvi|miR-151|nat|as|  
vvi|miR-151|2mut|as|  
vvi|miR-152|nat|as|  
vvi|miR-152|2mut|as|  
vvi|miR-153|nat|as|  
vvi|miR-153|2mut|as|  
vvi|miR-154|nat|as|  
vvi|miR-154|2mut|as|  
vvi|miR-155|nat|as|  
vvi|miR-155|2mut|as|  
vvi|miR-156|nat|as|  
vvi|miR-156|2mut|as|  
vvi|miR-157|nat|as|  
vvi|miR-157|2mut|as|  
vvi|miR-158|nat|as|  
vvi|miR-158|2mut|as|  
vvi|miR-159|nat|as|  
vvi|miR-159|2mut|as|  
vvi|miR-160|nat|as|  
vvi|miR-160|2mut|as|  
vvi|miR-161|nat|as|  
vvi|miR-161|2mut|as|  
vvi|miR-162|nat|as|  
vvi|miR-162|2mut|as|

atgctggcagcttcaactgc  
atgctgccagtttcaactgc  
agttgagatcatgctggcag  
agttgagataatcctggcag  
atgctggcagcttcaactat  
atgctgccagtttcaactat  
aaagctagatcatgctggca  
aaagttagatcatcctggca  
atgctggcagcttcaactga  
atgctgccagtttcaactga  
aagtttagatcatgctggca  
aagtttacatcatcctggca  
acctgaccaagcgaattag  
acctgaaccaagagaattag  
gtcggttcccgacctgcacc  
gtcggttccagacctccacc  
agtcattcctggctgcattc  
agtcattcctggctgcattc  
aaattccggcaagtcattc  
aaattccgccaagccattc  
agtcattcctcgctacaaa  
agtcattcctccctacaaa  
ggctgtaggcaagtcattc  
ggctgtaggcaagccattc  
gccattcctggctcaattc  
gccattcctccctcaattc  
gatgacggcaagccattc  
gatgacgccaagtcattc  
agtcattcctggctgcattc  
agtcattcctggctgcattc  
catctccggcaagtcattc  
catctccgccaagccattc  
aatcattcctggctgcattc  
aatcattcctggctgcattc

vvi-miR167c|-5\_perfect match probe  
vvi-miR167c|-5\_mismatch probe  
vvi-miR167c|+5\_perfect match probe  
vvi-miR167c|+5\_mismatch probe  
vvi-miR167d|-5\_perfect match probe  
vvi-miR167d|-5\_mismatch probe  
vvi-miR167d|+5\_perfect match probe  
vvi-miR167d|+5\_mismatch probe  
vvi-miR167e|-5\_perfect match probe  
vvi-miR167e|-5\_mismatch probe  
vvi-miR167e|+5\_perfect match probe  
vvi-miR167e|+5\_mismatch probe  
vvi-miR168|-5\_perfect match probe  
vvi-miR168|-5\_mismatch probe  
vvi-miR168|+5\_perfect match probe  
vvi-miR168|+5\_mismatch probe  
vvi-miR169a|-5\_perfect match probe  
vvi-miR169a|-5\_mismatch probe  
vvi-miR169a|+5\_perfect match probe  
vvi-miR169a|+5\_mismatch probe  
vvi-miR169y|-5\_perfect match probe  
vvi-miR169y|-5\_mismatch probe  
vvi-miR169y|+5\_perfect match probe  
vvi-miR169y|+5\_mismatch probe  
vvi-miR169b|-5\_perfect match probe  
vvi-miR169b|-5\_mismatch probe  
vvi-miR169b|+5\_perfect match probe  
vvi-miR169b|+5\_mismatch probe  
vvi-miR169c|-5\_perfect match probe  
vvi-miR169c|-5\_mismatch probe  
vvi-miR169c|+5\_perfect match probe  
vvi-miR169c|+5\_mismatch probe  
vvi-miR169d|-5\_perfect match probe  
vvi-miR169d|-5\_mismatch probe

vvi|miR-163|nat|as|  
vvi|miR-163|2mut|as|  
vvi|miR-164|nat|as|  
vvi|miR-164|2mut|as|  
vvi|miR-165|nat|as|  
vvi|miR-165|2mut|as|  
vvi|miR-166|nat|as|  
vvi|miR-166|2mut|as|  
vvi|miR-167|nat|as|  
vvi|miR-167|2mut|as|  
vvi|miR-168|nat|as|  
vvi|miR-168|2mut|as|  
vvi|miR-169|nat|as|  
vvi|miR-169|2mut|as|  
vvi|miR-170|nat|as|  
vvi|miR-170|2mut|as|  
vvi|miR-171|nat|as|  
vvi|miR-171|2mut|as|  
vvi|miR-172|nat|as|  
vvi|miR-172|2mut|as|  
vvi|miR-173|nat|as|  
vvi|miR-173|2mut|as|  
vvi|miR-174|nat|as|  
vvi|miR-174|2mut|as|  
vvi|miR-175|nat|as|  
vvi|miR-175|2mut|as|  
vvi|miR-176|nat|as|  
vvi|miR-176|2mut|as|  
vvi|miR-177|nat|as|  
vvi|miR-177|2mut|as|  
vvi|miR-178|nat|as|  
vvi|miR-178|2mut|as|  
vvi|miR-179|nat|as|  
vvi|miR-179|2mut|as|

aaattccggcaaatcattct  
aaattccgccaataattct  
agtcaccttggtatcaga  
agtcattcttgctatcaga  
tagggcaggcaagtcacct  
tagggcagccaagccatcct  
agtcaccttggtgcacca  
agtcattcttgctgcacca  
tatttcggcaagtcacct  
tatttcgccaagccatcct  
agtcaccttggtgcacca  
agtcattcttgctgcacca  
gagtcggcaagtcacctg  
gagtcgccaagtcattctg  
gccatccttggtcaattcc  
gccatccttccctcaattcc  
aaggacggcaagccatcct  
aaggacgccaagtcacct  
agtcaccttggtcaattc  
agtcattcttgctcaattc  
aatgacggccagtcacct  
aatgacggtaagtcacct  
agtcaccttggtgcactc  
agtcattcttgctgcactc  
gaattccggcaagtcacct  
gaattccgccaagccatcct  
agtcaccttggtgcactc  
agtcattcttgctgcactc  
gaattccggcaagtcacct  
gaattccgccaagccatcct  
agtcaccttggtcaattc  
agtcattcttgctcaattc  
aaaggacggcaagtcacct  
aaaggacgccaagccatcct

vvi-miR169d|+5\_perfect match probe  
vvi-miR169d|+5\_mismatch probe  
vvi-miR169e|-5\_perfect match probe  
vvi-miR169e|-5\_mismatch probe  
vvi-miR169e|+5\_perfect match probe  
vvi-miR169e|+5\_mismatch probe  
vvi-miR169f|-5\_perfect match probe  
vvi-miR169f|-5\_mismatch probe  
vvi-miR169f|+5\_perfect match probe  
vvi-miR169f|+5\_mismatch probe  
vvi-miR169g|-5\_perfect match probe  
vvi-miR169g|-5\_mismatch probe  
vvi-miR169g|+5\_perfect match probe  
vvi-miR169g|+5\_mismatch probe  
vvi-miR169h|-5\_perfect match probe  
vvi-miR169h|-5\_mismatch probe  
vvi-miR169h|+5\_perfect match probe  
vvi-miR169h|+5\_mismatch probe  
vvi-miR169i|-5\_perfect match probe  
vvi-miR169i|-5\_mismatch probe  
vvi-miR169i|+5\_perfect match probe  
vvi-miR169i|+5\_mismatch probe  
vvi-miR169j|-5\_perfect match probe  
vvi-miR169j|-5\_mismatch probe  
vvi-miR169j|+5\_perfect match probe  
vvi-miR169j|+5\_mismatch probe  
vvi-miR169k|-5\_perfect match probe  
vvi-miR169k|-5\_mismatch probe  
vvi-miR169k|+5\_perfect match probe  
vvi-miR169k|+5\_mismatch probe  
vvi-miR169l|-5\_perfect match probe  
vvi-miR169l|-5\_mismatch probe  
vvi-miR169l|+5\_perfect match probe  
vvi-miR169l|+5\_mismatch probe

vvi|miR-180|nat|as|  
vvi|miR-180|2mut|as|

vvi|miR-181|nat|as|  
vvi|miR-181|2mut|as|  
vvi|miR-182|nat|as|  
vvi|miR-182|2mut|as|  
vvi|miR-183|nat|as|  
vvi|miR-183|2mut|as|  
vvi|miR-184|nat|as|  
vvi|miR-184|2mut|as|  
vvi|miR-185|nat|as|  
vvi|miR-185|2mut|as|  
vvi|miR-186|nat|as|  
vvi|miR-186|2mut|as|  
vvi|miR-187|nat|as|  
vvi|miR-187|2mut|as|  
vvi|miR-188|nat|as|  
vvi|miR-188|2mut|as|  
vvi|miR-189|nat|as|  
vvi|miR-189|2mut|as|  
vvi|miR-190|nat|as|  
vvi|miR-190|2mut|as|  
vvi|miR-191|nat|as|  
vvi|miR-191|2mut|as|  
vvi|miR-192|nat|as|  
vvi|miR-192|2mut|as|  
vvi|miR-193|nat|as|  
vvi|miR-193|2mut|as|  
vvi|miR-194|nat|as|  
vvi|miR-194|2mut|as|  
vvi|miR-195|nat|as|  
vvi|miR-195|2mut|as|  
vvi|miR-196|nat|as|

agtcaccttggtcacttc  
agtcattcttgctcacttc

agctgccggcaagtcacct  
agctgccgccaagccatct  
agtcaccttggtctattc  
agtcattcttgctctattc  
agttgccggcaagtcacct  
agttgccgccaagccatct  
agtcaccttggtcacaatc  
agtcattcttgctcacaatc  
tgatggcggcaagtcacct  
tgatggaggcaagccatct  
agtcaccttggtcacaatc  
agtcattcttgctcacaatc  
agctgccggcaagtcacct  
agctgccgccaagccatct  
agtcaccttggtctattc  
agtcattcttgctctattc  
aatgccggcaagtcacct  
aatgccgccaagccatct  
gtcaccttgactcaattcc  
gtcattcttgctcaattcc  
tatatcggaagtcacctt  
tatatcgccaagccatctt  
agtcaccttggtcgaatc  
agtcattcttgctgcaatc  
aagtgccggcaagtcacct  
aagtgccgccaagccatct  
gtcaccttgactgattcc  
gtcattcttgactagattcc  
tatatcggaagtcacctt  
tatatcgccaagccatctt  
gtcaccttgactcaattcc

vvi-miR169m|-5\_perfect match probe  
vvi-miR169m|-5\_mismatch probe  
vvi-miR169m|+5\_perfect match  
probe  
vvi-miR169m|+5\_mismatch probe  
vvi-miR169n|-5\_perfect match probe  
vvi-miR169n|-5\_mismatch probe  
vvi-miR169n|+5\_perfect match probe  
vvi-miR169n|+5\_mismatch probe  
vvi-miR169o|-5\_perfect match probe  
vvi-miR169o|-5\_mismatch probe  
vvi-miR169o|+5\_perfect match probe  
vvi-miR169o|+5\_mismatch probe  
vvi-miR169p|-5\_perfect match probe  
vvi-miR169p|-5\_mismatch probe  
vvi-miR169p|+5\_perfect match probe  
vvi-miR169p|+5\_mismatch probe  
vvi-miR169q|-5\_perfect match probe  
vvi-miR169q|-5\_mismatch probe  
vvi-miR169q|+5\_perfect match probe  
vvi-miR169q|+5\_mismatch probe  
vvi-miR169r|-5\_perfect match probe  
vvi-miR169r|-5\_mismatch probe  
vvi-miR169r|+5\_perfect match probe  
vvi-miR169r|+5\_mismatch probe  
vvi-miR169s|-5\_perfect match probe  
vvi-miR169s|-5\_mismatch probe  
vvi-miR169s|+5\_perfect match probe  
vvi-miR169s|+5\_mismatch probe  
vvi-miR169t|-5\_perfect match probe  
vvi-miR169t|-5\_mismatch probe  
vvi-miR169t|+5\_perfect match probe  
vvi-miR169t|+5\_mismatch probe  
vvi-miR169u|-5\_perfect match probe

vvi|miR-196|2mut|as|  
vvi|miR-197|nat|as|  
vvi|miR-197|2mut|as|  
vvi|miR-198|nat|as|  
vvi|miR-198|2mut|as|  
vvi|miR-199|nat|as|  
vvi|miR-199|2mut|as|  
vvi|miR-200|nat|as|  
vvi|miR-200|2mut|as|

vvi|miR-201|nat|as|  
vvi|miR-201|2mut|as|  
vvi|miR-202|nat|as|  
vvi|miR-202|2mut|as|  
vvi|miR-203|nat|as|  
vvi|miR-203|2mut|as|  
vvi|miR-204|nat|as|  
vvi|miR-204|2mut|as|  
vvi|miR-205|nat|as|  
vvi|miR-205|2mut|as|  
vvi|miR-206|nat|as|  
vvi|miR-206|2mut|as|  
vvi|miR-207|nat|as|  
vvi|miR-207|2mut|as|  
vvi|miR-208|nat|as|  
vvi|miR-208|2mut|as|  
vvi|miR-209|nat|as|  
vvi|miR-209|2mut|as|  
vvi|miR-210|nat|as|  
vvi|miR-210|2mut|as|  
vvi|miR-211|nat|as|  
vvi|miR-211|2mut|as|  
vvi|miR-212|nat|as|  
vvi|miR-212|2mut|as|

gtcattcttgccctcaattcc  
tataacggcaagtcacctt  
tataacgcccaagccacctt  
attcattcttggtttgttc  
attcattcttgctttgttc  
catcgccggcaattcatcct  
catccccggcaattaatcct  
agtcaccttggtgcacca  
agtcattcttgctgcacca

agttgccggcaagtcacct  
agttgccccaagccatcct  
agtcaccttggtaccaga  
agtcattcttgctaccaga  
ggatttaggcaagtcacct  
ggatttagccaagccatcct  
gttgggacggctcaatcaaa  
gttgggacgctcaatcaaa  
ggaagcgtgatgtgggacg  
ggaagagtgatgtgtgacg  
gacgcggtcaatcaaatca  
gacgaggctcaataaatca  
aaggagatattgacgaggct  
aaggcgatattgacgaggct  
attggcacggctcaatcaaa  
attggcacgctcaatcaaa  
tgacacgtgatattggcacg  
tgacacctgatattgccacg  
attggcacggctcaatcaaa  
attggcacgctcaatcaaa  
taggacgtgatattggcacg  
taggacctgatattgccacg  
ggcgcggtcaatcagagat  
ggcgaggctcaatccgagat

vvi-miR169u|-5\_ mismatch probe  
vvi-miR169u|+5\_ perfect match probe  
vvi-miR169u|+5\_ mismatch probe  
vvi-miR169v|-5\_ perfect match probe  
vvi-miR169v|-5\_ mismatch probe  
vvi-miR169v|+5\_ perfect match probe  
vvi-miR169v|+5\_ mismatch probe  
vvi-miR169w|-5\_ perfect match probe  
vvi-miR169w|-5\_ mismatch probe  
vvi-miR169w|+5\_ perfect match  
probe  
vvi-miR169w|+5\_ mismatch probe  
vvi-miR169x|-5\_ perfect match probe  
vvi-miR169x|-5\_ mismatch probe  
vvi-miR169x|+5\_ perfect match probe  
vvi-miR169x|+5\_ mismatch probe  
vvi-miR171a|-5\_ perfect match probe  
vvi-miR171a|-5\_ mismatch probe  
vvi-miR171a|+5\_ perfect match probe  
vvi-miR171a|+5\_ mismatch probe  
vvi-miR171b|-5\_ perfect match probe  
vvi-miR171b|-5\_ mismatch probe  
vvi-miR171b|+5\_ perfect match probe  
vvi-miR171b|+5\_ mismatch probe  
vvi-miR171c|-5\_ perfect match probe  
vvi-miR171c|-5\_ mismatch probe  
vvi-miR171c|+5\_ perfect match probe  
vvi-miR171c|+5\_ mismatch probe  
vvi-miR171d|-5\_ perfect match probe  
vvi-miR171d|-5\_ mismatch probe  
vvi-miR171d|+5\_ perfect match probe  
vvi-miR171d|+5\_ mismatch probe  
vvi-miR171e|-5\_ perfect match probe  
vvi-miR171e|-5\_ mismatch probe

vvi|miR-213|nat|as|  
vvi|miR-213|2mut|as|  
vvi|miR-214|nat|as|  
vvi|miR-214|2mut|as|  
vvi|miR-215|nat|as|  
vvi|miR-215|2mut|as|  
vvi|miR-216|nat|as|  
vvi|miR-216|2mut|as|  
vvi|miR-217|nat|as|  
vvi|miR-217|2mut|as|  
vvi|miR-218|nat|as|  
vvi|miR-218|2mut|as|  
vvi|miR-219|nat|as|  
vvi|miR-219|2mut|as|  
vvi|miR-220|nat|as|  
vvi|miR-220|2mut|as|  
vvi|miR-221|nat|as|  
vvi|miR-221|2mut|as|  
vvi|miR-222|nat|as|  
vvi|miR-222|2mut|as|  
vvi|miR-223|nat|as|  
vvi|miR-223|2mut|as|  
vvi|miR-224|nat|as|  
vvi|miR-224|2mut|as|  
vvi|miR-225|nat|as|  
vvi|miR-225|2mut|as|  
vvi|miR-226|nat|as|  
vvi|miR-226|2mut|as|  
vvi|miR-227|nat|as|  
vvi|miR-227|2mut|as|  
vvi|miR-228|nat|as|  
vvi|miR-228|2mut|as|  
vvi|miR-229|nat|as|  
vvi|miR-229|2mut|as|

aaagtgatattggcgcggct  
aaagcgatattggcgaggct  
attggcgcggctcaatctga  
attggcgaggttcaatctga  
agaaaagtgatattggcgcg  
agaaaagcgatattgcccgcg  
attggttcggctcaaggagt  
attggttcgctcaaggagt  
gctcgggtgatattggttcg  
gctcaggtgatattcgttcg  
ggcgcggctcaacaaacat  
ggcgaggctcaacaaacat  
gacgggatattggcgcggct  
gacgtgatattggcgaggct  
attggcacggctcaatcaga  
attggcacgctcaatcaga  
aacatgatgatattggcacg  
aacatgataattgccacg  
catcatcaagattcacatgc  
catcataaagattcccacgc  
tgccgatgtagcatcatcaa  
tgccaatgtagaatcatcaa  
catcatcaagattcacatgc  
catcataaagattcccacgc  
tgcaggtgtagcatcatcaa  
tgcagctgtagaatcatcaa  
catcatcaagattcccacat  
catcataaagatttccacat  
tgccgctgcagcatcatcaa  
tgcccctgcagaatcatcaa  
catcatcaagatttccatct  
catcataaagatttcaatct  
tgccaatgcagcatcatcaa  
tgccaatgaagaatcatcaa

vvi-miR171e|+5\_perfect match probe  
vvi-miR171e|+5\_mismatch probe  
vvi-miR171f|-5\_perfect match probe  
vvi-miR171f|-5\_mismatch probe  
vvi-miR171f|+5\_perfect match probe  
vvi-miR171f|+5\_mismatch probe  
vvi-miR171g|-5\_perfect match probe  
vvi-miR171g|-5\_mismatch probe  
vvi-miR171g|+5\_perfect match probe  
vvi-miR171g|+5\_mismatch probe  
vvi-miR171h|-5\_perfect match probe  
vvi-miR171h|-5\_mismatch probe  
vvi-miR171h|+5\_perfect match probe  
vvi-miR171h|+5\_mismatch probe  
vvi-miR171i|-5\_perfect match probe  
vvi-miR171i|-5\_mismatch probe  
vvi-miR171i|+5\_perfect match probe  
vvi-miR171i|+5\_mismatch probe  
vvi-miR172a|-5\_perfect match probe  
vvi-miR172a|-5\_mismatch probe  
vvi-miR172a|+5\_perfect match probe  
vvi-miR172a|+5\_mismatch probe  
vvi-miR172b|-5\_perfect match probe  
vvi-miR172b|-5\_mismatch probe  
vvi-miR172b|+5\_perfect match probe  
vvi-miR172b|+5\_mismatch probe  
vvi-miR172c|-5\_perfect match probe  
vvi-miR172c|-5\_mismatch probe  
vvi-miR172c|+5\_perfect match probe  
vvi-miR172c|+5\_mismatch probe  
vvi-miR172d|-5\_perfect match probe  
vvi-miR172d|-5\_mismatch probe  
vvi-miR172d|+5\_perfect match probe  
vvi-miR172d|+5\_mismatch probe

vvi|miR-230|nat|as|  
vvi|miR-230|2mut|as|  
vvi|miR-231|nat|as|  
vvi|miR-231|2mut|as|  
vvi|miR-232|nat|as|  
vvi|miR-232|2mut|as|  
vvi|miR-233|nat|as|  
vvi|miR-233|2mut|as|  
vvi|miR-234|nat|as|  
vvi|miR-234|2mut|as|  
vvi|miR-235|nat|as|  
vvi|miR-235|2mut|as|  
vvi|miR-236|nat|as|  
vvi|miR-236|2mut|as|  
vvi|miR-237|nat|as|  
vvi|miR-237|2mut|as|  
vvi|miR-238|nat|as|  
vvi|miR-238|2mut|as|  
vvi|miR-239|nat|as|  
vvi|miR-239|2mut|as|  
vvi|miR-240|nat|as|  
vvi|miR-240|2mut|as|  
vvi|miR-241|nat|as|  
vvi|miR-241|2mut|as|  
vvi|miR-242|nat|as|  
vvi|miR-242|2mut|as|  
vvi|miR-243|nat|as|  
vvi|miR-243|2mut|as|  
vvi|miR-244|nat|as|  
vvi|miR-244|2mut|as|  
vvi|miR-245|nat|as|  
vvi|miR-245|2mut|as|  
vvi|miR-246|nat|as|  
vvi|miR-246|2mut|as|

tcccttcagtccaagacgtg  
tcccttcagccaaagacgtg  
tacaagggagctccttcag  
tacaagtgagctctcttcag  
tcccttcagtccaagcacag  
tcccttcagcccaagaacag  
gtgaagggagctccttcag  
gtgaagtgagctctcttcag  
tcccttcagtccaaaacaag  
tcccttcagccaaaaacaag  
gaactaggagctccttcag  
gaactaggacctctcttcag  
tcccttcagtccaagcacag  
tcccttcagcccaagaacag  
tagaagggagctccttcag  
tagaagtgagctctcttcag  
tcccttcagtccaatgagtg  
tcccttcagccaatgagtg  
gccttgggagctccttcag  
gccttgggagctctcttcag  
atccctctgagcttaacag  
atccctctgagtttaacag  
ctcatggcgctatcctcct  
ctcatggcctatctctcct  
tgcgatccctttggaactgt  
tgcgatctctttggaactgt  
ccatgggatcaatgcatcc  
ccatgtgatcaatgagatcc  
tgcgatccctttggatgct  
tgcgatctctttgatgct  
gtttgggatcaatgcatcc  
gtttgtgatcaatgagatcc  
tggacagaatgcaaaatgg  
tggaaagaatgtcaaaatgg

vvi-miR319b|-5\_perfect match probe  
vvi-miR319b|-5\_mismatch probe  
vvi-miR319b|+5\_perfect match probe  
vvi-miR319b|+5\_mismatch probe  
vvi-miR319c|-5\_perfect match probe  
vvi-miR319c|-5\_mismatch probe  
vvi-miR319c|+5\_perfect match probe  
vvi-miR319c|+5\_mismatch probe  
vvi-miR319e|-5\_perfect match probe  
vvi-miR319e|-5\_mismatch probe  
vvi-miR319e|+5\_perfect match probe  
vvi-miR319e|+5\_mismatch probe  
vvi-miR319f|-5\_perfect match probe  
vvi-miR319f|-5\_mismatch probe  
vvi-miR319f|+5\_perfect match probe  
vvi-miR319f|+5\_mismatch probe  
vvi-miR319g|-5\_perfect match probe  
vvi-miR319g|-5\_mismatch probe  
vvi-miR319g|+5\_perfect match probe  
vvi-miR319g|+5\_mismatch probe  
vvi-miR390|-5\_perfect match probe  
vvi-miR390|-5\_mismatch probe  
vvi-miR390|+5\_perfect match probe  
vvi-miR390|+5\_mismatch probe  
vvi-miR393a|-5\_perfect match probe  
vvi-miR393a|-5\_mismatch probe  
vvi-miR393a|+5\_perfect match probe  
vvi-miR393a|+5\_mismatch probe  
vvi-miR393b|-5\_perfect match probe  
vvi-miR393b|-5\_mismatch probe  
vvi-miR393b|+5\_perfect match probe  
vvi-miR393b|+5\_mismatch probe  
vvi-miR394a|-5\_perfect match probe  
vvi-miR394a|-5\_mismatch probe

vvi|miR-247|nat|as|  
vvi|miR-247|2mut|as|  
vvi|miR-248|nat|as|  
vvi|miR-248|2mut|as|  
vvi|miR-249|nat|as|  
vvi|miR-249|2mut|as|  
vvi|miR-250|nat|as|  
vvi|miR-250|2mut|as|  
vvi|miR-251|nat|as|  
vvi|miR-251|2mut|as|  
vvi|miR-252|nat|as|  
vvi|miR-252|2mut|as|  
vvi|miR-253|nat|as|  
vvi|miR-253|2mut|as|  
vvi|miR-254|nat|as|  
vvi|miR-254|2mut|as|  
vvi|miR-255|nat|as|  
vvi|miR-255|2mut|as|  
vvi|miR-256|nat|as|  
vvi|miR-256|2mut|as|  
vvi|miR-257|nat|as|  
vvi|miR-257|2mut|as|  
vvi|miR-258|nat|as|  
vvi|miR-258|2mut|as|  
vvi|miR-259|nat|as|  
vvi|miR-259|2mut|as|  
vvi|miR-260|nat|as|  
vvi|miR-260|2mut|as|  
vvi|miR-261|nat|as|  
vvi|miR-261|2mut|as|  
vvi|miR-262|nat|as|  
vvi|miR-262|2mut|as|  
vvi|miR-263|nat|as|  
vvi|miR-263|2mut|as|

tgcatggaggtggacagaat  
tgcatcgaggtcgacagaat  
tggacagaatgccataaac  
tggaaagaatgtcaataaac  
agatgggaggtggacagaat  
agatgtgaggtcgacagaat  
tggacagaatgccaaaatgg  
tggaaagaatgtcaaatgg  
tatatggaggtggacagaat  
tatatcgaggtcgacagaat  
ccccaaacacttcagtagga  
ccccaaaccctccgtagga  
accaggagttccccaaaca  
accagaagttccctcaaca  
ccccaaacacttcagtacgt  
ccccaaaccctccgtacgt  
accaggagttccccaaaca  
accagaagttccctcaaca  
ccccaaacacttcagtagga  
ccccaaaccctccgtagga  
accaggagttccccaaaca  
accagaagttccctcaaca  
ccccaaacacttcagtagga  
ccccaaaccctccgtagga  
accaggagttccccaaaca  
accagaagttccctcaaca  
ccccaaacacttcagtggga  
ccccaaacccttcagcggga  
accaggagttccccaaaca  
accagaagttccctcaaca

vvi-miR394a|+5\_perfect match probe  
vvi-miR394a|+5\_mismatch probe  
vvi-miR394b|-5\_perfect match probe  
vvi-miR394b|-5\_mismatch probe  
vvi-miR394b|+5\_perfect match probe  
vvi-miR394b|+5\_mismatch probe  
vvi-miR394c|-5\_perfect match probe  
vvi-miR394c|-5\_mismatch probe  
vvi-miR394c|+5\_perfect match probe  
vvi-miR394c|+5\_mismatch probe  
vvi-miR395a|-5\_perfect match probe  
vvi-miR395a|-5\_mismatch probe  
vvi-miR395a|+5\_perfect match probe  
vvi-miR395a|+5\_mismatch probe  
vvi-miR395b|-5\_perfect match probe  
vvi-miR395b|-5\_mismatch probe  
vvi-miR395b|+5\_perfect match probe  
vvi-miR395b|+5\_mismatch probe  
vvi-miR395c|-5\_perfect match probe  
vvi-miR395c|-5\_mismatch probe  
vvi-miR395c|+5\_perfect match probe  
vvi-miR395c|+5\_mismatch probe  
vvi-miR395d|-5\_perfect match probe  
vvi-miR395d|-5\_mismatch probe  
vvi-miR395d|+5\_perfect match probe  
vvi-miR395d|+5\_mismatch probe  
vvi-miR395e|-5\_perfect match probe  
vvi-miR395e|-5\_mismatch probe  
vvi-miR395e|+5\_perfect match probe  
vvi-miR395e|+5\_mismatch probe  
vvi-miR395f|-5\_perfect match probe  
vvi-miR395f|-5\_mismatch probe  
vvi-miR395f|+5\_perfect match probe  
vvi-miR395f|+5\_mismatch probe

vvi|miR-264|nat|as|  
vvi|miR-264|2mut|as|  
vvi|miR-265|nat|as|  
vvi|miR-265|2mut|as|  
vvi|miR-266|nat|as|  
vvi|miR-266|2mut|as|  
vvi|miR-267|nat|as|  
vvi|miR-267|2mut|as|  
vvi|miR-268|nat|as|  
vvi|miR-268|2mut|as|  
vvi|miR-269|nat|as|  
vvi|miR-269|2mut|as|  
vvi|miR-270|nat|as|  
vvi|miR-270|2mut|as|  
vvi|miR-271|nat|as|  
vvi|miR-271|2mut|as|  
vvi|miR-272|nat|as|  
vvi|miR-272|2mut|as|  
vvi|miR-273|nat|as|  
vvi|miR-273|2mut|as|  
vvi|miR-274|nat|as|  
vvi|miR-274|2mut|as|  
vvi|miR-275|nat|as|  
vvi|miR-275|2mut|as|  
vvi|miR-276|nat|as|  
vvi|miR-276|2mut|as|  
  
vvi|miR-277|nat|as|  
vvi|miR-277|2mut|as|  
vvi|miR-278|nat|as|  
vvi|miR-278|2mut|as|  
vvi|miR-279|nat|as|  
vvi|miR-279|2mut|as|  
vvi|miR-280|nat|as|

ccccaaacacttcagtagga  
ccccaaaccctccgtagga  
accgggagttccccaaaca  
accgtgagttccctcaaaca  
ccccaaacacttcagtagga  
ccccaaaccctccgtagga  
accaggagttccccaaaca  
accagaagttccctcaaaca  
ctccagactcttcagtagag  
ctccagcctcttcgtagag  
accaagagttcctccagact  
accaagactctcctcaagact  
agaaagctgtgggaggacat

vvi-miR395g|-5\_ perfect match probe  
vvi-miR395g|-5\_ mismatch probe  
vvi-miR395g|+5\_ perfect match probe  
vvi-miR395g|+5\_ mismatch probe  
vvi-miR395h|-5\_ perfect match probe  
vvi-miR395h|-5\_ mismatch probe  
vvi-miR395h|+5\_ perfect match probe  
vvi-miR395h|+5\_ mismatch probe  
vvi-miR395i|-5\_ perfect match probe  
vvi-miR395i|-5\_ mismatch probe  
vvi-miR395i|+5\_ perfect match probe  
vvi-miR395i|+5\_ mismatch probe  
vvi-miR395j|-5\_ perfect match probe  
vvi-miR395j|-5\_ mismatch probe  
vvi-miR395j|+5\_ perfect match probe  
vvi-miR395j|+5\_ mismatch probe  
vvi-miR395k|-5\_ perfect match probe  
vvi-miR395k|-5\_ mismatch probe  
vvi-miR395k|+5\_ perfect match probe  
vvi-miR395k|+5\_ mismatch probe  
vvi-miR395l|-5\_ perfect match probe  
vvi-miR395l|-5\_ mismatch probe  
vvi-miR395l|+5\_ perfect match probe  
vvi-miR395l|+5\_ mismatch probe  
vvi-miR395m|-5\_ perfect match probe  
vvi-miR395m|-5\_ mismatch probe  
vvi-miR395m|+5\_ perfect match  
probe  
vvi-miR395m|+5\_ mismatch probe  
vvi-miR395n|-5\_ perfect match probe  
vvi-miR395n|-5\_ mismatch probe  
vvi-miR395n|+5\_ perfect match probe  
vvi-miR395n|+5\_ mismatch probe  
vvi-miR396a|-5\_ perfect match probe

vvi|miR-280|2mut|as|  
vvi|miR-281|nat|as|  
vvi|miR-281|2mut|as|  
vvi|miR-282|nat|as|  
vvi|miR-282|2mut|as|  
vvi|miR-283|nat|as|  
vvi|miR-283|2mut|as|  
vvi|miR-284|nat|as|  
vvi|miR-284|2mut|as|  
vvi|miR-285|nat|as|  
vvi|miR-285|2mut|as|  
vvi|miR-286|nat|as|  
vvi|miR-286|2mut|as|  
vvi|miR-287|nat|as|  
vvi|miR-287|2mut|as|  
vvi|miR-288|nat|as|  
vvi|miR-288|2mut|as|  
vvi|miR-289|nat|as|  
vvi|miR-289|2mut|as|  
vvi|miR-290|nat|as|  
vvi|miR-290|2mut|as|  
vvi|miR-291|nat|as|  
vvi|miR-291|2mut|as|  
vvi|miR-292|nat|as|  
vvi|miR-292|2mut|as|  
vvi|miR-293|nat|as|  
vvi|miR-293|2mut|as|  
vvi|miR-294|nat|as|  
vvi|miR-294|2mut|as|  
vvi|miR-295|nat|as|  
vvi|miR-295|2mut|as|  
vvi|miR-296|nat|as|  
vvi|miR-296|2mut|as|  
vvi|miR-297|nat|as|

agaaagttgtgaggacat  
aatagaagctcaagaaagct  
aatagaagttaaagaaagct  
agaaagctgtgggaaacat  
agaaagttgtgtgaaacat  
cactgaagttcaagaaagct  
cactaaagttaaagaaagct  
aagaaagctgtggaagatca  
aagaaagttgtcgaagatca  
caaacagttcaagaaagct  
caaaaaagttaaagaaagct  
aagaaagctgtggaagaata  
aagaaagttgtcgaagaata  
aatgcagttcaagaaagct  
aatgaagttaaagaaagct  
cgctgcactcaatgatgttt  
cgctgaactcaataatgttt  
agtttcatcaacgctgcact  
agtttcataaacctgcact  
cgctgcactcaatgatgttt  
cgctgaactcaataatgttt  
agtttcatcaacgctgcact  
agtttcataaacctgcact  
tgacctgagaacacaaaatg  
tgacttgagaacccaaaatg  
cccaaagggtgacctgag  
cccaaagggtgatctgag  
cgacctgagaacacatgaga  
cgacttgagaacccatgaga  
tccagcagggcgacctgag  
tccagcaggtgagacctgag  
cgacctgagaacacatgaga  
cgacttgagaacccatgaga  
tccagcagggcgacctgag

vvi-miR396a|-5\_mismatch probe  
vvi-miR396a|+5\_perfect match probe  
vvi-miR396a|+5\_mismatch probe  
vvi-miR396b|-5\_perfect match probe  
vvi-miR396b|-5\_mismatch probe  
vvi-miR396b|+5\_perfect match probe  
vvi-miR396b|+5\_mismatch probe  
vvi-miR396c|-5\_perfect match probe  
vvi-miR396c|-5\_mismatch probe  
vvi-miR396c|+5\_perfect match probe  
vvi-miR396c|+5\_mismatch probe  
vvi-miR396d|-5\_perfect match probe  
vvi-miR396d|-5\_mismatch probe  
vvi-miR396d|+5\_perfect match probe  
vvi-miR396d|+5\_mismatch probe  
vvi-miR397a|-5\_perfect match probe  
vvi-miR397a|-5\_mismatch probe  
vvi-miR397a|+5\_perfect match probe  
vvi-miR397a|+5\_mismatch probe  
vvi-miR397b|-5\_perfect match probe  
vvi-miR397b|-5\_mismatch probe  
vvi-miR397b|+5\_perfect match probe  
vvi-miR397b|+5\_mismatch probe  
vvi-miR398a|-5\_perfect match probe  
vvi-miR398a|-5\_mismatch probe  
vvi-miR398a|+5\_perfect match probe  
vvi-miR398a|+5\_mismatch probe  
vvi-miR398b|-5\_perfect match probe  
vvi-miR398b|-5\_mismatch probe  
vvi-miR398b|+5\_perfect match probe  
vvi-miR398b|+5\_mismatch probe  
vvi-miR398c|-5\_perfect match probe  
vvi-miR398c|-5\_mismatch probe  
vvi-miR398c|+5\_perfect match probe

vvi|miR-297|2mut|as|  
vvi|miR-298|nat|as|  
vvi|miR-298|2mut|as|  
vvi|miR-299|nat|as|  
vvi|miR-299|2mut|as|  
vvi|miR-300|nat|as|  
vvi|miR-300|2mut|as|  
vvi|miR-301|nat|as|  
vvi|miR-301|2mut|as|  
vvi|miR-302|nat|as|  
vvi|miR-302|2mut|as|  
vvi|miR-303|nat|as|  
vvi|miR-303|2mut|as|  
vvi|miR-304|nat|as|  
vvi|miR-304|2mut|as|  
vvi|miR-305|nat|as|  
vvi|miR-305|2mut|as|  
vvi|miR-306|nat|as|  
vvi|miR-306|2mut|as|  
vvi|miR-307|nat|as|  
vvi|miR-307|2mut|as|  
vvi|miR-308|nat|as|  
vvi|miR-308|2mut|as|  
vvi|miR-309|nat|as|  
vvi|miR-309|2mut|as|  
vvi|miR-310|nat|as|  
vvi|miR-310|2mut|as|  
vvi|miR-311|nat|as|  
vvi|miR-311|2mut|as|  
vvi|miR-312|nat|as|  
vvi|miR-312|2mut|as|  
vvi|miR-313|nat|as|  
vvi|miR-313|2mut|as|  
vvi|miR-314|nat|as|

tccagcaggtgagacctgag  
aattctctttggcagagca  
aattctctttggcagagca  
aataacagggcaattctcct  
aataacaggcaattctcct  
aactctcctttggcaagtca  
aactcttctttgccaagtca  
agtcacagggcaactctcct  
agtcacaggcaactctcct  
aactctcctttggcagatca  
aactcttctttggcagatca  
agacacagggcaactctcct  
agacacaggcaactctcct  
aaatctcctttggcagacac  
aaatcttctttggcagacac  
aattcacagagcaaatctcct  
aattcaagagaaaatctcct  
aaatctcctttggcagaggg  
aaatcttctttggcagaggg  
aattgccgggcaaatctcct  
aattgccggcaaatctcct  
aaatctccttcggcagcgag  
aaatcttcttcggcagcgag  
aattgcaggacaaatctcct  
aattgaaggaaaaatctcct  
aaatctcctttggcagtgag  
aaatcttctttggcagtgag  
aattgaggggcaaatctcct  
aattgagggcaaatctcct  
aattctcctttggcaaaaca  
aattcttctttgcaaaaca  
aatggcagggcaattctcct  
aatggcagggcaaatctcct  
aactctcctttggcgggtca

vvi-miR398c|+5\_mismatch probe  
vvi-miR399a|-5\_perfect match probe  
vvi-miR399a|-5\_mismatch probe  
vvi-miR399a|+5\_perfect match probe  
vvi-miR399a|+5\_mismatch probe  
vvi-miR399b|-5\_perfect match probe  
vvi-miR399b|-5\_mismatch probe  
vvi-miR399b|+5\_perfect match probe  
vvi-miR399b|+5\_mismatch probe  
vvi-miR399c|-5\_perfect match probe  
vvi-miR399c|-5\_mismatch probe  
vvi-miR399c|+5\_perfect match probe  
vvi-miR399c|+5\_mismatch probe  
vvi-miR399d|-5\_perfect match probe  
vvi-miR399d|-5\_mismatch probe  
vvi-miR399d|+5\_perfect match probe  
vvi-miR399d|+5\_mismatch probe  
vvi-miR399e|-5\_perfect match probe  
vvi-miR399e|-5\_mismatch probe  
vvi-miR399e|+5\_perfect match probe  
vvi-miR399e|+5\_mismatch probe  
vvi-miR399f|-5\_perfect match probe  
vvi-miR399f|-5\_mismatch probe  
vvi-miR399f|+5\_perfect match probe  
vvi-miR399f|+5\_mismatch probe  
vvi-miR399g|-5\_perfect match probe  
vvi-miR399g|-5\_mismatch probe  
vvi-miR399g|+5\_perfect match probe  
vvi-miR399g|+5\_mismatch probe  
vvi-miR399h|-5\_perfect match probe  
vvi-miR399h|-5\_mismatch probe  
vvi-miR399h|+5\_perfect match probe  
vvi-miR399h|+5\_mismatch probe  
vvi-miR399i|-5\_perfect match probe

vvi|miR-314|2mut|as|  
vvi|miR-315|nat|as|  
vvi|miR-315|2mut|as|  
vvi|miR-316|nat|as|  
vvi|miR-316|2mut|as|  
vvi|miR-317|nat|as|  
vvi|miR-317|2mut|as|  
vvi|miR-318|nat|as|  
vvi|miR-318|2mut|as|  
vvi|miR-319|nat|as|  
vvi|miR-319|2mut|as|  
vvi|miR-320|nat|as|  
vvi|miR-320|2mut|as|  
vvi|miR-321|nat|as|  
vvi|miR-321|2mut|as|  
vvi|miR-322|nat|as|  
vvi|miR-322|2mut|as|  
vvi|miR-323|nat|as|  
vvi|miR-323|2mut|as|  
vvi|miR-324|nat|as|  
vvi|miR-324|2mut|as|  
vvi|miR-325|nat|as|  
vvi|miR-325|2mut|as|  
vvi|miR-326|nat|as|  
vvi|miR-326|2mut|as|  
vvi|miR-327|nat|as|  
vvi|miR-327|2mut|as|  
vvi|miR-328|nat|as|  
vvi|miR-328|2mut|as|  
vvi|miR-329|nat|as|  
vvi|miR-329|2mut|as|  
vvi|miR-330|nat|as|  
vvi|miR-330|2mut|as|  
vvi|miR-331|nat|as|

aactcttctttggagggtca  
agtcacaggcaactctcct  
agtcacaggcaactctcct  
tgtgctgtaactaacgccg  
tgtgagtgaactaaagccg  
actcacgagtttgtgctga  
actcaagagtttgtgagtga  
tgtgctgtaactaacacc  
tgtgagtgaactaaaccc  
gatcccagagtttgtgctga  
gatccagagtttgtgagtga  
tgtgctgtaactaacggcg  
tgtgagtgaactaaaggcg  
gatcacgagtttgtgctga  
gatcaagagtttgtgagtga  
tgtgctgtaactaacacc  
tgtgagtgaactaaaccc  
gatcccagagtttgtgctga  
gatccagagtttgtgagtga  
tgtgctgtaactaacggcg  
tgtgagtgaactaaaggcg  
gatcgagagtttgtgctga  
tgtgctgtaactaacacca  
tgtgagtgaactaacacca  
gattacgagtttgtgctga  
gattaagagtttgtgagtga  
gaagaggcagtgcatgggta  
gaagagccagtgatgggta  
acagagccaggggaaggcca  
acagagtcagtgaaaggcca  
gcctttgaggagattgaca  
gcctttgagtaagattgaca  
gaaaattggaagcctttgag

vvi-miR399i|-5\_mismatch probe  
vvi-miR399i|+5\_perfect match probe  
vvi-miR399i|+5\_mismatch probe  
vvi-miR403a|-5\_perfect match probe  
vvi-miR403a|-5\_mismatch probe  
vvi-miR403a|+5\_perfect match probe  
vvi-miR403a|+5\_mismatch probe  
vvi-miR403b|-5\_perfect match probe  
vvi-miR403b|-5\_mismatch probe  
vvi-miR403b|+5\_perfect match probe  
vvi-miR403b|+5\_mismatch probe  
vvi-miR403c|-5\_perfect match probe  
vvi-miR403c|-5\_mismatch probe  
vvi-miR403c|+5\_perfect match probe  
vvi-miR403c|+5\_mismatch probe  
vvi-miR403d|-5\_perfect match probe  
vvi-miR403d|-5\_mismatch probe  
vvi-miR403d|+5\_perfect match probe  
vvi-miR403d|+5\_mismatch probe  
vvi-miR403e|-5\_perfect match probe  
vvi-miR403e|-5\_mismatch probe  
vvi-miR403e|+5\_perfect match probe  
vvi-miR403e|+5\_mismatch probe  
vvi-miR403f|-5\_perfect match probe  
vvi-miR403f|-5\_mismatch probe  
vvi-miR403f|+5\_perfect match probe  
vvi-miR403f|+5\_mismatch probe  
vvi-miR408|-5\_perfect match probe  
vvi-miR408|-5\_mismatch probe  
vvi-miR408|+5\_perfect match probe  
vvi-miR408|+5\_mismatch probe  
vvi-miR477a|-5\_perfect match probe  
vvi-miR477a|-5\_mismatch probe  
vvi-miR477a|+5\_perfect match probe

vvi|miR-331|2mut|as|  
vvi|miR-332|nat|as|  
vvi|miR-332|2mut|as|  
vvi|miR-333|nat|as|  
vvi|miR-333|2mut|as|  
vvi|miR-334|nat|as|  
vvi|miR-334|2mut|as|  
vvi|miR-335|nat|as|  
vvi|miR-335|2mut|as|  
vvi|miR-336|nat|as|  
vvi|miR-336|2mut|as|  
vvi|miR-337|nat|as|  
vvi|miR-337|2mut|as|  
vvi|miR-338|nat|as|  
vvi|miR-338|2mut|as|  
vvi|miR-339|nat|as|  
vvi|miR-339|2mut|as|  
vvi|miR-340|nat|as|  
vvi|miR-340|2mut|as|  
vvi|miR-341|nat|as|  
vvi|miR-341|2mut|as|  
vvi|miR-342|nat|as|  
vvi|miR-342|2mut|as|  
vvi|miR-343|nat|as|  
vvi|miR-343|2mut|as|  
vvi|miR-344|nat|as|  
vvi|miR-344|2mut|as|  
vvi|miR-345|nat|as|  
vvi|miR-345|2mut|as|  
vvi|miR-346|nat|as|  
vvi|miR-346|2mut|as|  
vvi|miR-347|nat|as|  
vvi|miR-347|2mut|as|  
vvi|miR-348|nat|as|

gaaaattcgaagctttgag  
cgaaccaataaccacaccatg  
cgaacaaatacaacaccatg  
aagaagatgagccgaaccaa  
aagaagataagtcgaaccaa  
aatgggaggagtaggaaaga  
aatgtgaggagtagaaaaga  
caataggaatgggaggagta  
caatagaaatgtgaggagta  
tctctctcgttgtcaagcaa  
tctctctccttctcaagcaa  
tgactagcgtgctctctctc  
tgactagagtcctctctctc  
tctctctcgttgtcaagcaa  
tctctctccttctcaagcaa  
tgactagcgtgctctctctc  
tgactagagtcctctctctc  
tctctctcgttgtcaagcaa  
tctctctccttctcaagcaa  
tgactagcgtgctctctctc  
tctctctcgttgtcaagcaa  
tctctctccttctcaagcaa  
agactagcgtgctctctctc  
agactagagtcctctctctc  
tctctctcgttgtcaagcaa  
tctctctccttctcaagcaa  
agactagcgtgctctctctc  
agactagagtcctctctctc  
ctcatttgagcaagaaactt  
ctcatttgacaaagaaactt  
ttgtttggaataactcatttg  
ttgtttcgaataactcatttg  
ctcatttgagcaagaaacca

vvi-miR477a|+5\_mismatch probe  
vvi-miR479|-5\_perfect match probe  
vvi-miR479|-5\_mismatch probe  
vvi-miR479|+5\_perfect match probe  
vvi-miR479|+5\_mismatch probe  
vvi-miR482a|-5\_perfect match probe  
vvi-miR482a|-5\_mismatch probe  
vvi-miR482a|+5\_perfect match probe  
vvi-miR482a|+5\_mismatch probe  
vvi-miR535a|-5\_perfect match probe  
vvi-miR535a|-5\_mismatch probe  
vvi-miR535a|+5\_perfect match probe  
vvi-miR535a|+5\_mismatch probe  
vvi-miR535b|-5\_perfect match probe  
vvi-miR535b|-5\_mismatch probe  
vvi-miR535b|+5\_perfect match probe  
vvi-miR535b|+5\_mismatch probe  
vvi-miR535c|-5\_perfect match probe  
vvi-miR535c|-5\_mismatch probe  
vvi-miR535c|+5\_perfect match probe  
vvi-miR535c|+5\_mismatch probe  
vvi-miR535d|-5\_perfect match probe  
vvi-miR535d|-5\_mismatch probe  
vvi-miR535d|+5\_perfect match probe  
vvi-miR535d|+5\_mismatch probe  
vvi-miR535e|-5\_perfect match probe  
vvi-miR535e|-5\_mismatch probe  
vvi-miR535e|+5\_perfect match probe  
vvi-miR535e|+5\_mismatch probe  
vvi-miR828a|-5\_perfect match probe  
vvi-miR828a|-5\_mismatch probe  
vvi-miR828a|+5\_perfect match probe  
vvi-miR828a|+5\_mismatch probe  
vvi-miR828b|-5\_perfect match probe

|                     |                      |                                      |
|---------------------|----------------------|--------------------------------------|
| vvi miR-348 2mut as | ctcatttgacaaagaaacca | vvi-miR828b -5_ mismatch probe       |
| vvi miR-349 nat as  | tgatgtggaacactcatttg | vvi-miR828b +5_ perfect match probe  |
| vvi miR-349 2mut as | tgatgtcgaaccctcatttg | vvi-miR828b +5_ mismatch probe       |
| vvi miR-350 nat as  | ttggtatcagagctagacct | vvi-miR845a -5_ perfect match probe  |
| vvi miR-350 2mut as | ttggtatccgagttagacct | vvi-miR845a -5_ mismatch probe       |
| vvi miR-351 nat as  | tgttttatcaattggtatca | vvi-miR845a +5_ perfect match probe  |
| vvi miR-351 2mut as | tgttttataaattcgtatca | vvi-miR845a +5_ mismatch probe       |
| vvi miR-352 nat as  | ttggtatcagagctagacct | vvi-miR845b -5_ perfect match probe  |
| vvi miR-352 2mut as | ttggtatccgagttagacct | vvi-miR845b -5_ mismatch probe       |
| vvi miR-353 nat as  | tgttttatcaattggtatca | vvi-miR845b +5_ perfect match probe  |
| vvi miR-353 2mut as | tgttttataaattcgtatca | vvi-miR845b +5_ mismatch probe       |
| vvi miR-354 nat as  | ttggtatcagagcctcatgt | vvi-miR845c -5_ perfect match probe  |
| vvi miR-354 2mut as | ttggtatccgagtctcatgt | vvi-miR845c -5_ mismatch probe       |
| vvi miR-355 nat as  | ttatgcatcaattggtatca | vvi-miR845c +5_ perfect match probe  |
| vvi miR-355 2mut as | ttatgaatcaattcgtatca | vvi-miR845c +5_ mismatch probe       |
| vvi miR-356 nat as  | ttggtatcagagccataggt | vvi-miR845d -5_ perfect match probe  |
| vvi miR-356 2mut as | ttggtatccgagtcataggt | vvi-miR845d -5_ mismatch probe       |
| vvi miR-357 nat as  | tttcccatcaattggtatca | vvi-miR845d +5_ perfect match probe  |
| vvi miR-357 2mut as | tttctcatcaattcgtatca | vvi-miR845d +5_ mismatch probe       |
| vvi miR-358 nat as  | ttggtatcagagccataggt | vvi-miR845e -5_ perfect match probe  |
| vvi miR-358 2mut as | ttggtatccgagtcataggt | vvi-miR845e -5_ mismatch probe       |
| vvi miR-359 nat as  | tttcccatcaattggtatca | vvi-miR845e +5_ perfect match probe  |
| vvi miR-359 2mut as | tttctcatcaattcgtatca | vvi-miR845e +5_ mismatch probe       |
| <br>                |                      | vvi-miR156a -10_ perfect match probe |
| vvi miR-360 nat as  | tcttctgtcaacatatttct | vvi-miR156a -10_ mismatch probe      |
| vvi miR-360 2mut as | tcttctctcaaatatttct  | vvi-miR156a +10_ perfect match probe |
| <br>                |                      | vvi-miR156a +10_ mismatch probe      |
| vvi miR-361 nat as  | atgctgggttgctccctc   | vvi-miR156b -10_ perfect match probe |
| vvi miR-361 2mut as | atgctgtgtgctccctc    | vvi-miR156b -10_ mismatch probe      |
| <br>                |                      | vvi-miR156b +10_ perfect match probe |
| vvi miR-362 nat as  | tcttctgtcagtttcaatg  | vvi-miR156b -10_ mismatch probe      |
| vvi miR-362 2mut as | tcttctctcagttttaaag  | vvi-miR156b +10_ perfect match probe |
| <br>                |                      |                                      |
| vvi miR-363 nat as  | ttgcctctgtgtctcactc  |                                      |

|                     |                       |                                |
|---------------------|-----------------------|--------------------------------|
| vvi miR-363 nat as  | ttgcttctgtctcctcactc  | vvi-miR156b +10_mismatch probe |
| vvi miR-364 nat as  | tcttctgtcacctattcctt  | vvi-miR156c -10_perfect match  |
| vvi miR-364 2mut as | tcttctgtcctctattcctt  | probe                          |
| vvi miR-365 nat as  | cagaccatgtgtgctcactc  | vvi-miR156c -10_mismatch probe |
| vvi miR-365 2mut as | cagacaatgtgtcctcactc  | vvi-miR156c +10_perfect match  |
| vvi miR-366 nat as  | tcttctgtcagctctctct   | probe                          |
| vvi miR-366 2mut as | tcttctctcagcctctctct  | vvi-miR156c +10_mismatch probe |
| vvi miR-367 nat as  | ttgcctgcatgtgctcactc  | vvi-miR156d -10_perfect match  |
| vvi miR-367 2mut as | ttgcctgaatgtcctcactc  | probe                          |
| vvi miR-368 nat as  | tctctgtcacctaccatac   | vvi-miR156d -10_mismatch probe |
| vvi miR-368 2mut as | tctctgtcccctacaatac   | vvi-miR156d +10_perfect match  |
| vvi miR-369 nat as  | agaacctgagtgctcactc   | probe                          |
| vvi miR-369 2mut as | agaacaatgagtcctcactc  | vvi-miR156d +10_mismatch probe |
| vvi miR-370 nat as  | cttctgtcaacagaaacataa | vvi-miR156e -10_perfect match  |
| vvi miR-370 2mut as | cttctctcaacagaaaataa  | probe                          |
| vvi miR-371 nat as  | tgctctctatcttctgtcaa  | vvi-miR156e +10_mismatch probe |
| vvi miR-371 2mut as | tgctccctatcttctctcaa  | vvi-miR156e +10_perfect match  |
| vvi miR-372 nat as  | tgttcagttgtgctctctat  | probe                          |
| vvi miR-372 2mut as | tgttcagttctcctctctat  | vvi-miR156f -10_perfect match  |
| vvi miR-373 nat as  | cttctgtcaacaacatcacc  | probe                          |
| vvi miR-373 2mut as | cttctctcaacaaaatcacc  | vvi-miR156f +10_mismatch probe |
| vvi miR-374 nat as  | tgctctctatcttctgtcaa  | vvi-miR156g -10_perfect match  |
| vvi miR-374 2mut as | tgctccctatcttctctcaa  | probe                          |
| vvi miR-375 nat as  | tcatcatctgtgctctctat  | vvi-miR156g 0_perfect match    |
| vvi miR-375 2mut as | tcatcatctctcctctctat  | probe                          |
|                     |                       | vvi-miR156g +10_perfect match  |
|                     |                       | probe                          |
|                     |                       | vvi-miR156g +10_mismatch probe |

|                     |                      |                                     |
|---------------------|----------------------|-------------------------------------|
| vvi miR-376 nat as  | tcttctgtcattgtgaggca | vvi-miR156h -10_perfect match probe |
| vvi miR-376 2mut as | tcttctctcattgcgaggca | vvi-miR156h -10_mismatch probe      |
| vvi miR-377 nat as  | tcccaccagcatgctctctc | vvi-miR156h +10_perfect match probe |
| vvi miR-377 2mut as | tcccaccagaatcctctctc | vvi-miR156h +10_mismatch probe      |
| vvi miR-378 nat as  | tcttctgtcaacaacgtcac | vvi-miR156i -10_perfect match probe |
| vvi miR-378 2mut as | tcttctctcaacaacctcac | vvi-miR156i -10_mismatch probe      |
| vvi miR-379 nat as  | ttcatcatctgtgctctcta | vvi-miR156i +10_perfect match probe |
| vvi miR-379 2mut as | ttcatcatccgtcctctcta | vvi-miR156i +10_mismatch probe      |
| vvi miR-380 nat as  | tcactccaaggccagaaaga | vvi-miR159a -10_perfect match probe |
| vvi miR-380 2mut as | tcactcaaaggcagaaaga  | vvi-miR159a -10_mismatch probe      |
| vvi miR-381 nat as  | agagctcccttcaactcaag | vvi-miR159a 0_perfect match probe   |
| vvi miR-381 2mut as | agagctctcttcaactcaag | vvi-miR159a 0_mismatch probe        |
| vvi miR-382 nat as  | aagggttatgagagctccct | vvi-miR159a +10_perfect match probe |
| vvi miR-382 2mut as | aaggcttatgagagttccct | vvi-miR159a +10_mismatch probe      |
| vvi miR-383 nat as  | tcactccaaggccagaaaag | vvi-miR159b -10_perfect match probe |
| vvi miR-383 2mut as | tcactcaaaggcagaaaag  | vvi-miR159b -10_mismatch probe      |
| vvi miR-384 nat as  | agagctcccttcaactcaag | vvi-miR159b 0_perfect match probe   |
| vvi miR-384 2mut as | agagctctcttcaactcaag | vvi-miR159b 0_mismatch probe        |
| vvi miR-385 nat as  | atcggttatgagagctccct | vvi-miR159b +10_perfect match probe |
| vvi miR-385 2mut as | atcgcttatgagagttccct | vvi-miR159b +10_mismatch probe      |
| vvi miR-386 nat as  | tcaatccaacaaggatcta  | vvi-miR159c -10_perfect match probe |
| vvi miR-386 2mut as | tcaatcaaaaagaatcta   | vvi-miR159c -10_mismatch probe      |
| vvi miR-387 nat as  | agagctccctcaatcaaaa  | vvi-miR159c 0_perfect match probe   |
| vvi miR-387 2mut as | agagctctctcaattcaaaa | vvi-miR159c 0_mismatch probe        |
| vvi miR-388 nat as  | agagaggtgtagagctccct | vvi-miR159c +10_perfect match probe |

|                     |                      |                                     |
|---------------------|----------------------|-------------------------------------|
| vvi miR-388 2mut as | agagagctgtagagttcct  | vvi-miR159c +10_mismatch probe      |
| vvi miR-389 nat as  | gagccaggcagatcaacccc | vvi-miR160a -10_perfect match probe |
| vvi miR-389 2mut as | gagccagccagataaacccc | vvi-miR160a -10_mismatch probe      |
| vvi miR-390 nat as  | ggcattcagggagccaggca | vvi-miR160a 0_perfect match probe   |
| vvi miR-390 2mut as | ggcattcagtgagtcaggca | vvi-miR160a 0_mismatch probe        |
| vvi miR-391 nat as  | cttcttagatggcattcagg | vvi-miR160a +10_perfect match probe |
| vvi miR-391 2mut as | cttcttacatgccattcagg | vvi-miR160a +10_mismatch probe      |
| vvi miR-392 nat as  | gagccaggcagaacaatatt | vvi-miR160b -10_perfect match probe |
| vvi miR-392 2mut as | gagccagccagaaaaatatt | vvi-miR160b -10_mismatch probe      |
| vvi miR-393 nat as  | ggcattcagggagccaggca | vvi-miR160b 0_perfect match probe   |
| vvi miR-393 2mut as | ggcattcagtgagtcaggca | vvi-miR160b 0_mismatch probe        |
| vvi miR-394 nat as  | cttcttagatggcattcagg | vvi-miR160b +10_perfect match probe |
| vvi miR-394 2mut as | cttcttacatgccattcagg | vvi-miR160b +10_mismatch probe      |
| vvi miR-395 nat as  | gagccaggcacaaccattt  | vvi-miR160c -10_perfect match probe |
| vvi miR-395 2mut as | gagccagccacaactcattt | vvi-miR160c -10_mismatch probe      |
| vvi miR-396 nat as  | ggcatacagggagccaggca | vvi-miR160c 0_perfect match probe   |
| vvi miR-396 2mut as | ggcatacagtgagtcaggca | vvi-miR160c 0_mismatch probe        |
| vvi miR-397 nat as  | ctctacgtgtggcatacagg | vvi-miR160c +10_perfect match probe |
| vvi miR-397 2mut as | ctctacctgtgcatacagg  | vvi-miR160c +10_mismatch probe      |
| vvi miR-398 nat as  | gagccaggcatgtaagtatg | vvi-miR160d -10_perfect match probe |
| vvi miR-398 2mut as | gagccagccatctaagtatg | vvi-miR160d -10_mismatch probe      |
| vvi miR-399 nat as  | ggcatacagggagccaggca | vvi-miR160d 0_perfect match probe   |
| vvi miR-399 2mut as | ggcatacagtgagtcaggca | vvi-miR160d 0_mismatch probe        |
| vvi miR-400 nat as  | ctttgcaaatggcatacagg | vvi-miR160d +10_perfect match probe |
| vvi miR-400 2mut as | ctttgaaaatgccatacagg | vvi-miR160d +10_mismatch probe      |
| vvi miR-401 nat as  | gagccaggcagaacaatatt | vvi-miR160e -10_perfect match probe |

vvi|miR-401|2mut|as|  
vvi|miR-402|nat|as|  
vvi|miR-402|2mut|as|

vvi|miR-403|nat|as|  
vvi|miR-403|2mut|as|  
vvi|miR-404|nat|as|  
vvi|miR-404|2mut|as|  
vvi|miR-405|nat|as|  
vvi|miR-405|2mut|as|

vvi|miR-406|nat|as|  
vvi|miR-406|2mut|as|  
vvi|miR-407|nat|as|  
vvi|miR-407|2mut|as|  
vvi|miR-408|nat|as|  
vvi|miR-408|2mut|as|  
vvi|miR-409|nat|as|  
vvi|miR-409|2mut|as|

vvi|miR-410|nat|as|  
vvi|miR-410|2mut|as|  
vvi|miR-411|nat|as|  
vvi|miR-411|2mut|as|

vvi|miR-412|nat|as|  
vvi|miR-412|2mut|as|

vvi|miR-413|nat|as|  
vvi|miR-413|2mut|as|  
vvi|miR-414|nat|as|  
vvi|miR-414|2mut|as|  
vvi|miR-415|nat|as|

gagccagccagaaaaatatt  
ggcattcagggagccaggca  
ggcattcagtgagtcaggca

cttcttagatggcattcagg  
cttcttacatgccattcagg  
gagccaggcatatatgctta  
gagccagccatatacctta  
ggcatacagggagccaggca  
ggcatacagtgagtcaggca

ctctgcaaatggcatacagg  
ctctgaaaatgccatacagg  
ggtttatcgaccgattcttg  
ggtttatagacagattcttg  
tggatgcagaggttatcga  
tggatgaagagctttatcga  
gagtgaacgctggatgcaga  
gagtgaaccctggatccaga

tgcttctccaacaaggagct  
tgcttctcaacaagaagct  
gcacgtgccctgcttctcca  
gcacgtgtcctccttctcca

aggcaaatctgcacgtgccc  
aggcaaatccgaacgtgccc

tgcttctccagcatggttta  
tgcttctcaagaatggttta  
gcatgtgccctgcttctcca  
gcatgtgtcctccttctcca  
gattgatccagcatgtgccc

probe  
vvi-miR160e|-10\_mismatch probe  
vvi-miR160e|0\_perfect match probe  
vvi-miR160e|0\_mismatch probe  
vvi-miR160e|+10\_perfect match  
probe  
vvi-miR160e|+10\_mismatch probe  
vvi-miR160f|-10\_perfect match probe  
vvi-miR160f|-10\_mismatch probe  
vvi-miR160f|0\_perfect match probe  
vvi-miR160f|0\_mismatch probe  
vvi-miR160f|+10\_perfect match  
probe  
vvi-miR160f|+10\_mismatch probe  
vvi-miR162|-10\_perfect match probe  
vvi-miR162|-10\_mismatch probe  
vvi-miR162|0\_perfect match probe  
vvi-miR162|0\_mismatch probe  
vvi-miR162|+10\_perfect match probe  
vvi-miR162|+10\_mismatch probe  
vvi-miR164a|-10\_perfect match  
probe  
vvi-miR164a|-10\_mismatch probe  
vvi-miR164a|0\_perfect match probe  
vvi-miR164a|0\_mismatch probe  
vvi-miR164a|+10\_perfect match  
probe  
vvi-miR164a|+10\_mismatch probe  
vvi-miR164b|-10\_perfect match  
probe  
vvi-miR164b|-10\_mismatch probe  
vvi-miR164b|0\_perfect match probe  
vvi-miR164b|0\_mismatch probe  
vvi-miR164b|+10\_perfect match

|                     |                      |                                                                                   |
|---------------------|----------------------|-----------------------------------------------------------------------------------|
| vvi miR-415 2mut as | gattgatcaagaatgtgccc | probe<br>vvi-miR164b +10_mismatch probe<br>vvi-miR164d -10_perfect match<br>probe |
| vvi miR-416 nat as  | tgcttctccatcaagagctt |                                                                                   |
| vvi miR-416 2mut as | tgcttctcaataaagagctt | vvi-miR164d -10_mismatch probe                                                    |
| vvi miR-417 nat as  | gcacgtgccctgcttctcca | vvi-miR164d 0_perfect match probe                                                 |
| vvi miR-417 2mut as | gcacgtgtcctccttctcca | vvi-miR164d 0_mismatch probe<br>vvi-miR164d +10_perfect match<br>probe            |
| vvi miR-418 nat as  | tttgtgaactgcacgtgccc | vvi-miR164d +10_mismatch probe                                                    |
| vvi miR-418 2mut as | tttgcgaactgaacgtgccc | vvi-miR166c -10_perfect match<br>probe                                            |
| vvi miR-419 nat as  | cctgggccgacgacaccaac | vvi-miR166c -10_mismatch probe                                                    |
| vvi miR-419 2mut as | cctggtcagaagacaccaac | vvi-miR166c 0_perfect match probe                                                 |
| vvi miR-420 nat as  | gggaatgaagcctggccga  | vvi-miR166c 0_mismatch probe                                                      |
| vvi miR-420 2mut as | gggaatgaactctggccga  | vvi-miR166c +10_perfect match<br>probe                                            |
| vvi miR-421 nat as  | gataattgggggaatgaag  | vvi-miR166c +10_mismatch probe                                                    |
| vvi miR-421 2mut as | gataattggtgtgaatgaag | vvi-miR166d -10_perfect match<br>probe                                            |
| vvi miR-422 nat as  | cctgggccgagggcactaac | vvi-miR166d -10_mismatch probe                                                    |
| vvi miR-422 2mut as | cctggtcagagccactaac  | vvi-miR166d 0_perfect match probe                                                 |
| vvi miR-423 nat as  | gggaatgaagcctggccga  | vvi-miR166d 0_mismatch probe                                                      |
| vvi miR-423 2mut as | gggaatgaactctggccga  | vvi-miR166d +10_perfect match<br>probe                                            |
| vvi miR-424 nat as  | agtgattgaggggaatgaag | vvi-miR166d +10_mismatch probe                                                    |
| vvi miR-424 2mut as | agtgattgacgtgaatgaag | vvi-miR166e -10_perfect match<br>probe                                            |
| vvi miR-425 nat as  | cctgggccgacgacaccaac | vvi-miR166e -10_mismatch probe                                                    |
| vvi miR-425 2mut as | cctggtcagaagacaccaac | vvi-miR166e 0_perfect match probe                                                 |
| vvi miR-426 nat as  | gggaatgaagcctggccga  | vvi-miR166e 0_mismatch probe                                                      |
| vvi miR-426 2mut as | gggaatgaactctggccga  | vvi-miR166e +10_perfect match<br>probe                                            |
| vvi miR-427 nat as  | ataaattgggggaatgaag  | vvi-miR166e +10_mismatch probe                                                    |
| vvi miR-427 2mut as | ataaattggtgtgaatgaag |                                                                                   |

|                     |                       |                                     |
|---------------------|-----------------------|-------------------------------------|
| vvi miR-428 nat as  | cctggtccgaagcttttga   | vvi-miR166f -10_perfect match probe |
| vvi miR-428 2mut as | cctggtcagaagtttttga   | vvi-miR166f -10_mismatch probe      |
| vvi miR-429 nat as  | gggaatgaagcctggtccga  | vvi-miR166f 0_perfect match probe   |
| vvi miR-429 2mut as | gggaatgaactctggtccga  | vvi-miR166f 0_mismatch probe        |
| vvi miR-430 nat as  | gtgtgttgagggaatgaag   | vvi-miR166f +10_perfect match probe |
| vvi miR-430 2mut as | gtgtgttgacgtgaatgaag  | vvi-miR166f +10_mismatch probe      |
| vvi miR-431 nat as  | cctggtccgaaatcattcaa  | vvi-miR166g -10_perfect match probe |
| vvi miR-431 2mut as | cctggtcagaaataattcaa  | vvi-miR166g -10_mismatch probe      |
| vvi miR-432 nat as  | gggaatgaagcctggtccga  | vvi-miR166g 0_perfect match probe   |
| vvi miR-432 2mut as | gggaatgaactctggtccga  | vvi-miR166g 0_mismatch probe        |
| vvi miR-433 nat as  | ttgggttgagggaatgaag   | vvi-miR166g +10_perfect match probe |
| vvi miR-433 2mut as | ttggcttgaggtgaatgaag  | vvi-miR166g +10_mismatch probe      |
| vvi miR-434 nat as  | cctggtccgagatcattcag  | vvi-miR166h -10_perfect match probe |
| vvi miR-434 2mut as | cctggtcagagataattcag  | vvi-miR166h -10_mismatch probe      |
| vvi miR-435 nat as  | gggaatgaagcctggtccga  | vvi-miR166h 0_perfect match probe   |
| vvi miR-435 2mut as | gggaatgaactctggtccga  | vvi-miR166h 0_mismatch probe        |
| vvi miR-436 nat as  | ttgagttgggggaatgaag   | vvi-miR166h +10_perfect match probe |
| vvi miR-436 2mut as | ttgagttggtgtgaatgaag  | vvi-miR166h +10_mismatch probe      |
| vvi miR-437 nat as  | cctggtccgagatcaaccga  | vvi-miR166a -10_perfect match probe |
| vvi miR-437 2mut as | cctggtcagagataaaccga  | vvi-miR166a -10_mismatch probe      |
| vvi miR-438 nat as  | aggaatgaagcctggtccga  | vvi-miR166a 0_perfect match probe   |
| vvi miR-438 2mut as | aggaatgaactctggtccga  | vvi-miR166a 0_mismatch probe        |
| vvi miR-439 nat as  | gcttggtgtcaggaatgaag  | vvi-miR166a +10_perfect match probe |
| vvi miR-439 2mut as | gcttcgtgtcagaaatgaag  | vvi-miR166a +10_mismatch probe      |
| vvi miR-440 nat as  | cctggtccgacaccttcaact | vvi-miR166b -10_perfect match probe |
| vvi miR-440 2mut as | cctggtcagacatcttcaact | vvi-miR166b -10_mismatch probe      |

|                                                                                           |                                                                                               |                                                                                                                                               |
|-------------------------------------------------------------------------------------------|-----------------------------------------------------------------------------------------------|-----------------------------------------------------------------------------------------------------------------------------------------------|
| vvi miR-441 nat as <br>vvi miR-441 2mut as                                                | aggaatgaagcctggtccga<br>aggaatgaactctggtccga                                                  | vvi-miR166b 0_perfect match probe<br>vvi-miR166b 0_mismatch probe<br>vvi-miR166b +10_perfect match<br>probe                                   |
| vvi miR-442 nat as <br>vvi miR-442 2mut as                                                | tatatttgagaggaatgaag<br>tatatttaagagaaatgaag                                                  | vvi-miR166b +10_mismatch probe<br>vvi-miR167a -10_perfect match<br>probe                                                                      |
| vvi miR-443 nat as <br>vvi miR-443 2mut as <br>vvi miR-444 nat as <br>vvi miR-444 2mut as | ggcagcttcaacctctcaaa<br>ggcagtttcaatctctcaaa<br>agatcatgctggcagcttca<br>agatcatcctgccagcttca  | vvi-miR167a -10_mismatch probe<br>vvi-miR167a 0_perfect match probe<br>vvi-miR167a 0_mismatch probe<br>vvi-miR167a +10_perfect match<br>probe |
| vvi miR-445 nat as <br>vvi miR-445 2mut as                                                | ttgtttcaccagatcatgct<br>ttgtttcacacgatcatgct                                                  | vvi-miR167a +10_mismatch probe<br>vvi-miR167b -10_perfect match<br>probe                                                                      |
| vvi miR-446 nat as <br>vvi miR-446 2mut as <br>vvi miR-447 nat as <br>vvi miR-447 2mut as | ggcagcttcaactgctattg<br>ggcagtttcaactcctattg<br>agatcatgctggcagcttca<br>agatcatcctgccagcttca  | vvi-miR167b -10_mismatch probe<br>vvi-miR167b 0_perfect match probe<br>vvi-miR167b 0_mismatch probe<br>vvi-miR167b +10_perfect match<br>probe |
| vvi miR-448 nat as <br>vvi miR-448 2mut as                                                | agaaaagcttagatcatgct<br>agaaaagtttagataatgct                                                  | vvi-miR167b +10_mismatch probe<br>vvi-miR167c -10_perfect match<br>probe                                                                      |
| vvi miR-449 nat as <br>vvi miR-449 2mut as                                                | ggcagcttcaactgctactg<br>ggcagtttcaactcctactg                                                  | vvi-miR167c -10_mismatch probe<br>vvi-miR167c +10_perfect match<br>probe                                                                      |
| vvi miR-450 nat as <br>vvi miR-450 2mut as                                                | agggaagttgagatcatgct<br>agggaagttaagataatgct                                                  | vvi-miR167c +10_mismatch probe<br>vvi-miR167d -10_perfect match<br>probe                                                                      |
| vvi miR-451 nat as <br>vvi miR-451 2mut as <br>vvi miR-452 nat as <br>vvi miR-452 2mut as | ggcagcttcaacttattccct<br>ggcagtttcaattattccct<br>agatcatgctggcagcttca<br>agatcatcctgccagcttca | vvi-miR167d -10_mismatch probe<br>vvi-miR167d 0_perfect match probe<br>vvi-miR167d 0_mismatch probe<br>vvi-miR167d +10_perfect match<br>probe |
| vvi miR-453 nat as                                                                        | agccaaagctagatcatgct                                                                          |                                                                                                                                               |

|                     |                       |                                     |
|---------------------|-----------------------|-------------------------------------|
| vvi miR-453 2mut as | agccaaagttagataatgct  | vvi-miR167d +10_mismatch probe      |
| vvi miR-454 nat as  | ggcagcttcaactgatagtg  | vvi-miR167e -10_perfect match probe |
| vvi miR-454 2mut as | ggcagtttcaaccgatagtg  | vvi-miR167e -10_mismatch probe      |
| vvi miR-455 nat as  | agatcatgctggcagcttca  | vvi-miR167e 0_perfect match probe   |
| vvi miR-455 2mut as | agatcatcctgccagcttca  | vvi-miR167e 0_mismatch probe        |
| vvi miR-456 nat as  | aagcaagtttagatcatgct  | vvi-miR167e +10_perfect match probe |
| vvi miR-456 2mut as | aagcaactttagataatgct  | vvi-miR167e +10_mismatch probe      |
| vvi miR-457 nat as  | caccaagcgaattagagacc  | vvi-miR168 -10_perfect match probe  |
| vvi miR-457 2mut as | caccaagagaattagcagacc | vvi-miR168 -10_mismatch probe       |
| vvi miR-458 nat as  | tcccgaacctgcaccaagcga | vvi-miR168 0_perfect match probe    |
| vvi miR-458 2mut as | tcccgaacctcaaccaagcga | vvi-miR168 0_mismatch probe         |
| vvi miR-459 nat as  | cgaagtcggtcccgaacctg  | vvi-miR168 +10_perfect match probe  |
| vvi miR-459 2mut as | cgaagtcagttccagacctg  | vvi-miR168 +10_mismatch probe       |
| vvi miR-460 nat as  | tccttggtgcattccactc   | vvi-miR169a -10_perfect match probe |
| vvi miR-460 2mut as | tccttgctgaattccactc   | vvi-miR169a -10_mismatch probe      |
| vvi miR-461 nat as  | cggcaagtcattccttggtg  | vvi-miR169a 0_perfect match probe   |
| vvi miR-461 2mut as | cggcaagccattccttcgctg | vvi-miR169a 0_mismatch probe        |
| vvi miR-462 nat as  | atataaattccggcaagtca  | vvi-miR169a +10_perfect match probe |
| vvi miR-462 2mut as | atataaatttcgccaagtca  | vvi-miR169a +10_mismatch probe      |
| vvi miR-463 nat as  | tccttcgctaccaaaacaacg | vvi-miR169y -10_perfect match probe |
| vvi miR-463 2mut as | tccttcctacaaaaacaacg  | vvi-miR169y -10_mismatch probe      |
| vvi miR-464 nat as  | aggcaagtcattccttcgcta | vvi-miR169y 0_perfect match probe   |
| vvi miR-464 2mut as | aggcaagccattccttagcta | vvi-miR169y 0_mismatch probe        |
| vvi miR-465 nat as  | aggaggctgtaggcaagtca  | vvi-miR169y +10_perfect match probe |
| vvi miR-465 2mut as | aggagcctgtagccaagtca  | vvi-miR169y +10_mismatch probe      |
| vvi miR-466 nat as  | ccttggtcaattcgacccc   | vvi-miR169b -10_perfect match probe |
| vvi miR-466 2mut as | ccttgctcaattagacccc   | vvi-miR169b -10_mismatch probe      |

|                     |                      |                                     |
|---------------------|----------------------|-------------------------------------|
| vvi miR-467 nat as  | ggcaagccatccttggctca | vvi-miR169b 0_perfect match probe   |
| vvi miR-467 2mut as | ggcaagtcatccttgcctca | vvi-miR169b 0_mismatch probe        |
| vvi miR-468 nat as  | tgcagatgacggcaagccat | vvi-miR169b +10_perfect match probe |
| vvi miR-468 2mut as | tgcagatgaagccaagccat | vvi-miR169b +10_mismatch probe      |
| vvi miR-469 nat as  | tccttggctgcattctactc | vvi-miR169c -10_perfect match probe |
| vvi miR-469 2mut as | tccttgcctgaattctactc | vvi-miR169c -10_mismatch probe      |
| vvi miR-470 nat as  | cggcaagtcaccttggctg  | vvi-miR169c 0_perfect match probe   |
| vvi miR-470 2mut as | cggcaagccatccttcgctg | vvi-miR169c 0_mismatch probe        |
| vvi miR-471 nat as  | gccccatctcggcaagtca  | vvi-miR169c +10_perfect match probe |
| vvi miR-471 2mut as | gcccattctcggccaagtca | vvi-miR169c +10_mismatch probe      |
| vvi miR-472 nat as  | ttcttggctgcattcactc  | vvi-miR169d -10_perfect match probe |
| vvi miR-472 2mut as | ttcttgcctgaattcactc  | vvi-miR169d -10_mismatch probe      |
| vvi miR-473 nat as  | cggcaaatcattcttggctg | vvi-miR169d 0_perfect match probe   |
| vvi miR-473 2mut as | cggcaataattcttcgctg  | vvi-miR169d 0_mismatch probe        |
| vvi miR-474 nat as  | atataaattcggcaaatca  | vvi-miR169d +10_perfect match probe |
| vvi miR-474 2mut as | atataaatttcgccaatca  | vvi-miR169d +10_mismatch probe      |
| vvi miR-475 nat as  | tccttggctatcagacaaga | vvi-miR169e -10_perfect match probe |
| vvi miR-475 2mut as | tccttgcctatcagaaaaga | vvi-miR169e -10_mismatch probe      |
| vvi miR-476 nat as  | aggcaagtcaccttggcta  | vvi-miR169e 0_perfect match probe   |
| vvi miR-476 2mut as | aggcaagccatccttcgcta | vvi-miR169e 0_mismatch probe        |
| vvi miR-477 nat as  | gggatagggcaggcaagtca | vvi-miR169e +10_perfect match probe |
| vvi miR-477 2mut as | gggataggccagccaagtca | vvi-miR169e +10_mismatch probe      |
| vvi miR-478 nat as  | tccttggctgcaccataata | vvi-miR169f -10_perfect match probe |
| vvi miR-478 2mut as | tccttgcctgaaccataata | vvi-miR169f -10_mismatch probe      |
| vvi miR-479 nat as  | cggcaagtcaccttggctg  | vvi-miR169f 0_perfect match probe   |
| vvi miR-479 2mut as | cggcaagccatccttcgctg | vvi-miR169f 0_mismatch probe        |
| vvi miR-480 nat as  | aaattatttcggcaagtca  | vvi-miR169f +10_perfect match probe |

|                     |                      |                                                                                   |
|---------------------|----------------------|-----------------------------------------------------------------------------------|
| vvi miR-480 2mut as | aaattatttcgccaagtca  | probe<br>vvi-miR169f +10_mismatch probe<br>vvi-miR169g -10_perfect match<br>probe |
| vvi miR-481 nat as  | tccttggtgcaccatactt  |                                                                                   |
| vvi miR-481 2mut as | tccttgctgaaccatactt  | vvi-miR169g -10_mismatch probe                                                    |
| vvi miR-482 nat as  | cggcaagtcaccttggtg   | vvi-miR169g 0_perfect match probe                                                 |
| vvi miR-482 2mut as | cggcaagccaccttcgctg  | vvi-miR169g 0_mismatch probe<br>vvi-miR169g +10_perfect match<br>probe            |
| vvi miR-483 nat as  | agtagagagtcggcaagtca | vvi-miR169g +10_mismatch probe                                                    |
| vvi miR-483 2mut as | agtagagagccgccaagtca | vvi-miR169h -10_perfect match<br>probe                                            |
| vvi miR-484 nat as  | ccttggtcaattccacct   | vvi-miR169h -10_mismatch probe                                                    |
| vvi miR-484 2mut as | ccttgctcaattcaacct   | vvi-miR169h 0_perfect match probe                                                 |
| vvi miR-485 nat as  | ggcaagccaccttggtca   | vvi-miR169h 0_mismatch probe                                                      |
| vvi miR-485 2mut as | ggcaagtcaccttgctca   | vvi-miR169h +10_perfect match<br>probe                                            |
| vvi miR-486 nat as  | gacaaaggacggcaagccat | vvi-miR169h +10_mismatch probe                                                    |
| vvi miR-486 2mut as | gacaaaggaagccaagccat | vvi-miR169i -10_perfect match probe                                               |
| vvi miR-487 nat as  | tccttggtcaattccacc   | vvi-miR169i -10_mismatch probe                                                    |
| vvi miR-487 2mut as | tccttgctcaattcaacc   | vvi-miR169i 0_perfect match probe                                                 |
| vvi miR-488 nat as  | cggccagtcaccttggtc   | vvi-miR169i 0_mismatch probe                                                      |
| vvi miR-488 2mut as | cggcaagtcaccttcgctc  | vvi-miR169i +10_perfect match<br>probe                                            |
| vvi miR-489 nat as  | tgaaaaatgacggccagtca | vvi-miR169i +10_mismatch probe                                                    |
| vvi miR-489 2mut as | tgaaaaatgccggtcagtca | vvi-miR169j -10_perfect match probe                                               |
| vvi miR-490 nat as  | tccttggtgcactccactc  | vvi-miR169j -10_mismatch probe                                                    |
| vvi miR-490 2mut as | tccttgctgaactccactc  | vvi-miR169j 0_perfect match probe                                                 |
| vvi miR-491 nat as  | cggcaagtcaccttggtg   | vvi-miR169j 0_mismatch probe                                                      |
| vvi miR-491 2mut as | cggcaagccaccttcgctg  | vvi-miR169j +10_perfect match<br>probe                                            |
| vvi miR-492 nat as  | atgtgaattccggcaagtca | vvi-miR169j +10_mismatch probe                                                    |
| vvi miR-492 2mut as | atgtgaattcgccaagtca  | vvi-miR169k -10_perfect match<br>probe                                            |
| vvi miR-493 nat as  | tccttggtgcactccactc  |                                                                                   |

|                     |                       |                                     |
|---------------------|-----------------------|-------------------------------------|
| vvi miR-493 2mut as | tccttgccctgaactccactc | vvi-miR169k -10_mismatch probe      |
| vvi miR-494 nat as  | cggcaagtcaccttggetg   | vvi-miR169k 0_perfect match probe   |
| vvi miR-494 2mut as | cggcaagccatccttcgctg  | vvi-miR169k 0_mismatch probe        |
| vvi miR-495 nat as  | atgtgaattccggcaagtea  | vvi-miR169k +10_perfect match probe |
| vvi miR-495 2mut as | atgtgaatttcgccaagtea  | vvi-miR169k +10_mismatch probe      |
| vvi miR-496 nat as  | tccttggetcaattccacc   | vvi-miR169l -10_perfect match probe |
| vvi miR-496 2mut as | tccttgctcaattcaacc    | vvi-miR169l -10_mismatch probe      |
| vvi miR-497 nat as  | cggcaagtcaccttggetc   | vvi-miR169l 0_perfect match probe   |
| vvi miR-497 2mut as | cggcaagccatccttcgctc  | vvi-miR169l 0_mismatch probe        |
| vvi miR-498 nat as  | atgcaaaggacggcaagtea  | vvi-miR169l +10_perfect match probe |
| vvi miR-498 2mut as | atgcaaagaacgccaagtea  | vvi-miR169l +10_mismatch probe      |
| vvi miR-499 nat as  | tccttggetcacttccactc  | vvi-miR169m -10_perfect match probe |
| vvi miR-499 2mut as | tccttgctcacttcaactc   | vvi-miR169m -10_mismatch probe      |
| vvi miR-500 nat as  | cggcaagtcaccttggetc   | vvi-miR169m 0_perfect match probe   |
| vvi miR-500 2mut as | cggcaagccatccttcgctc  | vvi-miR169m 0_mismatch probe        |
| vvi miR-501 nat as  | ctgcagctgccggcaagtea  | vvi-miR169m +10_perfect match probe |
| vvi miR-501 2mut as | ctgcagctgtcgccaagtea  | vvi-miR169m +10_mismatch probe      |
| vvi miR-502 nat as  | tccttggetctattccactc  | vvi-miR169n -10_perfect match probe |
| vvi miR-502 2mut as | tccttgctctattcaactc   | vvi-miR169n -10_mismatch probe      |
| vvi miR-503 nat as  | cggcaagtcaccttggetc   | vvi-miR169n 0_perfect match probe   |
| vvi miR-503 2mut as | cggcaagccatccttcgctc  | vvi-miR169n 0_mismatch probe        |
| vvi miR-504 nat as  | ctgcagttgccggcaagtea  | vvi-miR169n +10_perfect match probe |
| vvi miR-504 2mut as | ctgcagttgtcgccaagtea  | vvi-miR169n +10_mismatch probe      |
| vvi miR-505 nat as  | tccttggetcaaatccacc   | vvi-miR169o -10_perfect match probe |
| vvi miR-505 2mut as | tccttgctcaaatcaacc    | vvi-miR169o -10_mismatch probe      |
| vvi miR-506 nat as  | cggcaagtcaccttggetc   | vvi-miR169o 0_perfect match probe   |
| vvi miR-506 2mut as | cggcaagccatccttcgctc  | vvi-miR169o 0_mismatch probe        |

|                     |                       |                                     |
|---------------------|-----------------------|-------------------------------------|
| vvi miR-507 nat as  | ctgctgatggcggcaagtca  | vvi-miR169o +10_perfect match       |
| vvi miR-507 2mut as | ctgctgatgcaggcaagtca  | probe                               |
|                     |                       | vvi-miR169o +10_mismatch probe      |
| vvi miR-508 nat as  | tccttggctcaattccacac  | vvi-miR169p -10_perfect match       |
| vvi miR-508 2mut as | tccttgcctcaattcaacac  | probe                               |
| vvi miR-509 nat as  | cggcaagtcaccttggctc   | vvi-miR169p -10_mismatch probe      |
| vvi miR-509 2mut as | cggcaagccatccttcgctc  | vvi-miR169p 0_perfect match probe   |
|                     |                       | vvi-miR169p 0_mismatch probe        |
| vvi miR-510 nat as  | ctgcagctgccggcaagtca  | vvi-miR169p +10_perfect match       |
| vvi miR-510 2mut as | ctgcagctgtcgccaagtca  | probe                               |
|                     |                       | vvi-miR169p +10_mismatch probe      |
| vvi miR-511 nat as  | tccttggctctattccacc   | vvi-miR169q -10_perfect match       |
| vvi miR-511 2mut as | tccttgcctctattcaacc   | probe                               |
| vvi miR-512 nat as  | cggcaagtcaccttggctc   | vvi-miR169q -10_mismatch probe      |
| vvi miR-512 2mut as | cggcaagccatccttcgctc  | vvi-miR169q 0_perfect match probe   |
|                     |                       | vvi-miR169q 0_mismatch probe        |
| vvi miR-513 nat as  | ctgcaaatgccggcaagtca  | vvi-miR169q +10_perfect match       |
| vvi miR-513 2mut as | ctgcaaatgtcgccaagtca  | probe                               |
| vvi miR-514 nat as  | ccttgactcaattccaccct  | vvi-miR169q +10_mismatch probe      |
| vvi miR-514 2mut as | ccttgacctcaattcaaccct | vvi-miR169r -10_perfect match probe |
| vvi miR-515 nat as  | ggcaagtcaccttgactca   | vvi-miR169r -10_mismatch probe      |
| vvi miR-515 2mut as | ggcaagccattcttgactca  | vvi-miR169r 0_perfect match probe   |
|                     |                       | vvi-miR169r 0_mismatch probe        |
| vvi miR-516 nat as  | aatatatatcggcaagtcat  | vvi-miR169r +10_perfect match       |
| vvi miR-516 2mut as | aatatatatagccaagtcat  | probe                               |
| vvi miR-517 nat as  | tccttggctgcaatccactt  | vvi-miR169r +10_mismatch probe      |
| vvi miR-517 2mut as | tccttgcctgaaatccactt  | vvi-miR169s -10_perfect match probe |
| vvi miR-518 nat as  | cggcaagtcaccttggctg   | vvi-miR169s -10_mismatch probe      |
| vvi miR-518 2mut as | cggcaagccatccttcgctg  | vvi-miR169s 0_perfect match probe   |
|                     |                       | vvi-miR169s 0_mismatch probe        |
| vvi miR-519 nat as  | tgccaagtgccggcaagtca  | vvi-miR169s +10_perfect match       |
| vvi miR-519 2mut as | tgccaagtgtcgccaagtca  | probe                               |
| vvi miR-520 nat as  | ccttgactcgattccaccct  | vvi-miR169s +10_mismatch probe      |
|                     |                       | vvi-miR169t -10_perfect match probe |

|                     |                       |                                     |
|---------------------|-----------------------|-------------------------------------|
| vvi miR-520 2mut as | ccttgactagattcaaccct  | vvi-miR169t -10_mismatch probe      |
| vvi miR-521 nat as  | ggcaagtcaccttgactcg   | vvi-miR169t 0_perfect match probe   |
| vvi miR-521 2mut as | ggcaagccattcttgactcg  | vvi-miR169t 0_mismatch probe        |
| vvi miR-522 nat as  | aatatatatcggcaagtcac  | vvi-miR169t +10_perfect match probe |
| vvi miR-522 2mut as | aatatatatagccaagtcac  | vvi-miR169t +10_mismatch probe      |
| vvi miR-523 nat as  | ccttgactcaattccaccct  | vvi-miR169u -10_perfect match probe |
| vvi miR-523 2mut as | ccttgacctcaattcaaccct | vvi-miR169u -10_mismatch probe      |
| vvi miR-524 nat as  | ggcaagtcaccttgactca   | vvi-miR169u 0_perfect match probe   |
| vvi miR-524 2mut as | ggcaagccattcttgactca  | vvi-miR169u 0_mismatch probe        |
| vvi miR-525 nat as  | aatatataacggcaagtcac  | vvi-miR169u +10_perfect match probe |
| vvi miR-525 2mut as | aatatataagccaagtcac   | vvi-miR169u +10_mismatch probe      |
| vvi miR-526 nat as  | tccttggttcttctccc     | vvi-miR169v -10_perfect match probe |
| vvi miR-526 2mut as | tccttgcttcttctccc     | vvi-miR169v -10_mismatch probe      |
| vvi miR-527 nat as  | cggcaattcatccttggtt   | vvi-miR169v 0_perfect match probe   |
| vvi miR-527 2mut as | cggcaattaatccttctt    | vvi-miR169v 0_mismatch probe        |
| vvi miR-528 nat as  | ctttcatcgcggcaattca   | vvi-miR169v +10_perfect match probe |
| vvi miR-528 2mut as | ctttcatccccgcaattca   | vvi-miR169v +10_mismatch probe      |
| vvi miR-529 nat as  | tccttggtgcaccacataa   | vvi-miR169w -10_perfect match probe |
| vvi miR-529 2mut as | tccttgctgaaccacataa   | vvi-miR169w -10_mismatch probe      |
| vvi miR-530 nat as  | cggcaagtcaccttggtt    | vvi-miR169w 0_perfect match probe   |
| vvi miR-530 2mut as | cggcaagccatccttctt    | vvi-miR169w 0_mismatch probe        |
| vvi miR-531 nat as  | aggaggtgccggcaagtca   | vvi-miR169w +10_perfect match probe |
| vvi miR-531 2mut as | aggaggtgtcgccaagtca   | vvi-miR169w +10_mismatch probe      |
| vvi miR-532 nat as  | tccttggtaccagacgaga   | vvi-miR169x -10_perfect match probe |
| vvi miR-532 2mut as | tccttgctaccagaagaga   | vvi-miR169x -10_mismatch probe      |
| vvi miR-533 nat as  | aggcaagtcaccttggtt    | vvi-miR169x 0_perfect match probe   |

|                     |                       |                                     |
|---------------------|-----------------------|-------------------------------------|
| vvi miR-533 2mut as | aggcaagccatccttcgcta  | vvi-miR169x 0_mismatch probe        |
| vvi miR-534 nat as  | tggtggatttaggcaagtca  | vvi-miR169x +10_perfect match probe |
| vvi miR-534 2mut as | tggtcgatttagccaagtca  | vvi-miR169x +10_mismatch probe      |
| vvi miR-535 nat as  | gacggctcaatcaaaccaaa  | vvi-miR171a -10_perfect match probe |
| vvi miR-535 2mut as | gacgcctcaatcaaatcaaa  | vvi-miR171a -10_mismatch probe      |
| vvi miR-536 nat as  | gtgatgttgaggacggctcaa | vvi-miR171a 0_perfect match probe   |
| vvi miR-536 2mut as | gtgatgttgacgcctcaa    | vvi-miR171a 0_mismatch probe        |
| vvi miR-537 nat as  | ggtgggaagcgtgatgttgg  | vvi-miR171a +10_perfect match probe |
| vvi miR-537 2mut as | ggtgggaagactgatgttgg  | vvi-miR171a +10_mismatch probe      |
| vvi miR-538 nat as  | ggctcaatcaaatcacatgg  | vvi-miR171b -10_perfect match probe |
| vvi miR-538 2mut as | ggctcaataaaatccatgg   | vvi-miR171b -10_mismatch probe      |
| vvi miR-539 nat as  | atattgacgcggctcaatca  | vvi-miR171b 0_perfect match probe   |
| vvi miR-539 2mut as | atattgacgagcctcaatca  | vvi-miR171b 0_mismatch probe        |
| vvi miR-540 nat as  | gcaaaaggagatattgacgc  | vvi-miR171b +10_perfect match probe |
| vvi miR-540 2mut as | gcaaaagaagatattaacgc  | vvi-miR171b +10_mismatch probe      |
| vvi miR-541 nat as  | cacggctcaatcaaaaacca  | vvi-miR171c -10_perfect match probe |
| vvi miR-541 2mut as | cacgcctcaataaaaaacca  | vvi-miR171c -10_mismatch probe      |
| vvi miR-542 nat as  | gtgatattggcacggctcaa  | vvi-miR171c 0_perfect match probe   |
| vvi miR-542 2mut as | gtgatattgccacgcctcaa  | vvi-miR171c 0_mismatch probe        |
| vvi miR-543 nat as  | gcaatgacacgtgatattgg  | vvi-miR171c +10_perfect match probe |
| vvi miR-543 2mut as | gcaatgacaactgatattgg  | vvi-miR171c +10_mismatch probe      |
| vvi miR-544 nat as  | cacggctcaatcaaaaaca   | vvi-miR171d -10_perfect match probe |
| vvi miR-544 2mut as | cacgcctcaatcaaaaaaca  | vvi-miR171d -10_mismatch probe      |
| vvi miR-545 nat as  | gtgatattggcacggctcaa  | vvi-miR171d 0_perfect match probe   |
| vvi miR-545 2mut as | gtgatattgccacgcctcaa  | vvi-miR171d 0_mismatch probe        |
| vvi miR-546 nat as  | gaagtaggacgtgatattgg  | vvi-miR171d +10_perfect match probe |

|                     |                       |                                                                                   |
|---------------------|-----------------------|-----------------------------------------------------------------------------------|
| vvi miR-546 2mut as | gaagtaggaactgatattgg  | probe<br>vvi-miR171d +10_mismatch probe<br>vvi-miR171e -10_perfect match<br>probe |
| vvi miR-547 nat as  | ggctcaatcagagatcggtc  | vvi-miR171e -10_mismatch probe                                                    |
| vvi miR-547 2mut as | ggctcaatccgagatagttc  | vvi-miR171e 0_perfect match probe                                                 |
| vvi miR-548 nat as  | atattggcgcggctcaatca  | vvi-miR171e 0_mismatch probe                                                      |
| vvi miR-548 2mut as | atattggcgcgacctcaatca | vvi-miR171e +10_perfect match<br>probe                                            |
| vvi miR-549 nat as  | gcagaaagtgatattggcgc  | vvi-miR171e +10_mismatch probe                                                    |
| vvi miR-549 2mut as | gcagaaagcgatattcgcgc  | vvi-miR171f -10_perfect match probe                                               |
| vvi miR-550 nat as  | cgcggctcaatctgagatca  | vvi-miR171f -10_mismatch probe                                                    |
| vvi miR-550 2mut as | cgcgcctcaatccgagatca  | vvi-miR171f 0_perfect match probe                                                 |
| vvi miR-551 nat as  | gtgatattggcgcggctcaa  | vvi-miR171f 0_mismatch probe                                                      |
| vvi miR-551 2mut as | gtgatattgccgaggctcaa  | vvi-miR171f +10_perfect match<br>probe                                            |
| vvi miR-552 nat as  | ccacagaaaagtgatattgg  | vvi-miR171f +10_mismatch probe                                                    |
| vvi miR-552 2mut as | ccaccgaaaagcgatattgg  | vvi-miR171g -10_perfect match<br>probe                                            |
| vvi miR-553 nat as  | ttcggctcaaggagttggtg  | vvi-miR171g -10_mismatch probe                                                    |
| vvi miR-553 2mut as | ttcgcctcaagaagttggtg  | vvi-miR171g 0_perfect match probe                                                 |
| vvi miR-554 nat as  | gtgatattggttcggctcaa  | vvi-miR171g 0_mismatch probe                                                      |
| vvi miR-554 2mut as | gtgatattcgctcgcctcaa  | vvi-miR171g +10_perfect match<br>probe                                            |
| vvi miR-555 nat as  | tttgctcgggtgatattgg   | vvi-miR171g +10_mismatch probe                                                    |
| vvi miR-555 2mut as | ttgcctcggctgatattgg   | vvi-miR171h -10_perfect match<br>probe                                            |
| vvi miR-556 nat as  | ggctcaaccaaacatcagag  | vvi-miR171h -10_mismatch probe                                                    |
| vvi miR-556 2mut as | ggctcaacaaaaaatcagag  | vvi-miR171h 0_perfect match probe                                                 |
| vvi miR-557 nat as  | atattggcgcggctcaacca  | vvi-miR171h 0_mismatch probe                                                      |
| vvi miR-557 2mut as | atattggcgcgacctcaacca | vvi-miR171h +10_perfect match<br>probe                                            |
| vvi miR-558 nat as  | gatagacgggatattggcgc  | vvi-miR171h +10_mismatch probe                                                    |
| vvi miR-558 2mut as | gatagacaggatattcgcgc  | vvi-miR171i -10_perfect match probe                                               |
| vvi miR-559 nat as  | cacggctcaatcagattaaa  |                                                                                   |

|                     |                       |                                     |
|---------------------|-----------------------|-------------------------------------|
| vvi miR-559 2mut as | cacgcctcaatccgattaaa  | vvi-miR171i -10_mismatch probe      |
| vvi miR-560 nat as  | atgatattggcacggctcaa  | vvi-miR171i 0_perfect match probe   |
| vvi miR-560 2mut as | atgatattgccacgcctcaa  | vvi-miR171i 0_mismatch probe        |
| vvi miR-561 nat as  | agtgaacatgatgatattgg  | vvi-miR171i +10_perfect match probe |
| vvi miR-561 2mut as | agtgaaaatgataatattgg  | vvi-miR171i +10_mismatch probe      |
| vvi miR-562 nat as  | tcaagattcacatgcaaatg  | vvi-miR172a -10_perfect match probe |
| vvi miR-562 2mut as | tcaagattccatgaaaatg   | vvi-miR172a -10_mismatch probe      |
| vvi miR-563 nat as  | tgtagcatcatcaagattca  | vvi-miR172a 0_perfect match probe   |
| vvi miR-563 2mut as | tgtagaatcataaagattca  | vvi-miR172a 0_mismatch probe        |
| vvi miR-564 nat as  | tgtttgcgcatgtagcatca  | vvi-miR172a +10_perfect match probe |
| vvi miR-564 2mut as | tgtttgccatgtagaatca   | vvi-miR172a +10_mismatch probe      |
| vvi miR-565 nat as  | tcaagattcacatgcgaaaag | vvi-miR172b -10_perfect match probe |
| vvi miR-565 2mut as | tcaagattccatgagaaaag  | vvi-miR172b -10_mismatch probe      |
| vvi miR-566 nat as  | tgtagcatcatcaagattca  | vvi-miR172b 0_perfect match probe   |
| vvi miR-566 2mut as | tgtagaatcataaagattca  | vvi-miR172b 0_mismatch probe        |
| vvi miR-567 nat as  | tgtttgcaggtgtagcatca  | vvi-miR172b +10_perfect match probe |
| vvi miR-567 2mut as | tgtttgaaggtgtagaatca  | vvi-miR172b +10_mismatch probe      |
| vvi miR-568 nat as  | tcaagattcccacatcaaag  | vvi-miR172c -10_perfect match probe |
| vvi miR-568 2mut as | tcaagattctaacatcaaag  | vvi-miR172c -10_mismatch probe      |
| vvi miR-569 nat as  | tcgagcatcatcaagattcc  | vvi-miR172c 0_perfect match probe   |
| vvi miR-569 2mut as | tcgagaatcataaagattcc  | vvi-miR172c 0_mismatch probe        |
| vvi miR-570 nat as  | ttattgccgctgcagcatca  | vvi-miR172c +10_perfect match probe |
| vvi miR-570 2mut as | ttattgccctgcagaatca   | vvi-miR172c +10_mismatch probe      |
| vvi miR-571 nat as  | tcaagattctcatctcaaaa  | vvi-miR172d -10_perfect match probe |
| vvi miR-571 2mut as | tcaagattcccatctcaaaa  | vvi-miR172d -10_mismatch probe      |
| vvi miR-572 nat as  | tcgagcatcatcaagattct  | vvi-miR172d 0_perfect match probe   |

|                                                                                                                                          |                                                                                                                                              |                                                                                                                                                                                                                        |
|------------------------------------------------------------------------------------------------------------------------------------------|----------------------------------------------------------------------------------------------------------------------------------------------|------------------------------------------------------------------------------------------------------------------------------------------------------------------------------------------------------------------------|
| vvi miR-572 2mut as                                                                                                                      | tgcagaatcataaagattct                                                                                                                         | vvi-miR172d 0_mismatch probe<br>vvi-miR172d +10_perfect match<br>probe                                                                                                                                                 |
| vvi miR-573 nat as <br>vvi miR-573 2mut as                                                                                               | tcactgCGaatgcagcatca<br>tcactgagaatgcagaatca                                                                                                 | vvi-miR172d +10_mismatch probe<br>vvi-miR319b -10_perfect match<br>probe                                                                                                                                               |
| vvi miR-574 nat as <br>vvi miR-574 2mut as <br>vvi miR-575 nat as <br>vvi miR-575 2mut as                                                | tcagtccaagacgtgacagc<br>tcagtcaaagacctgacagc<br>ggagctcccttcagtccaag<br>ggagctctcttcagtccaag                                                 | vvi-miR319b -10_mismatch probe<br>vvi-miR319b 0_perfect match probe<br>vvi-miR319b 0_mismatch probe<br>vvi-miR319b +10_perfect match<br>probe                                                                          |
| vvi miR-576 nat as <br>vvi miR-576 2mut as                                                                                               | ggaatacaaggagctccct<br>ggaatacaactgagctccct                                                                                                  | vvi-miR319b +10_mismatch probe<br>vvi-miR319c -10_perfect match<br>probe                                                                                                                                               |
| vvi miR-577 nat as <br>vvi miR-577 2mut as <br>vvi miR-578 nat as <br>vvi miR-578 2mut as                                                | tcagtccaagcacaggagc<br>tcagtccaaccacagtgagc<br>ggagctcccttcagtccaag<br>ggagctctcttcagtccaag                                                  | vvi-miR319c -10_mismatch probe<br>vvi-miR319c 0_perfect match probe<br>vvi-miR319c 0_mismatch probe<br>vvi-miR319c +10_perfect match<br>probe                                                                          |
| vvi miR-579 nat as <br>vvi miR-579 2mut as                                                                                               | tgcagtgaaggagctccct<br>tgcagtgaactgagctccct                                                                                                  | vvi-miR319c +10_mismatch probe<br>vvi-miR319e -10_perfect match<br>probe                                                                                                                                               |
| vvi miR-580 nat as <br>vvi miR-580 2mut as <br>vvi miR-581 nat as <br>vvi miR-581 2mut as                                                | tcagtccaaaacaaggagca<br>tcagtcaaaaacaagaagca<br>ggagctcccttcagtccaaa<br>ggagctctcttcagtccaaa                                                 | vvi-miR319e -10_mismatch probe<br>vvi-miR319e 0_perfect match probe<br>vvi-miR319e 0_mismatch probe<br>vvi-miR319e +10_perfect match<br>probe                                                                          |
| vvi miR-582 nat as <br>vvi miR-582 2mut as <br>vvi miR-583 nat as <br>vvi miR-583 2mut as <br>vvi miR-584 nat as <br>vvi miR-584 2mut as | agaagaactaggagctccct<br>agaagaattaggagttccct<br>tcagtccaagcacagacaag<br>tcagtccaacaacagacaag<br>ggagctcccttcagtccaag<br>ggagctctcttcagtccaag | vvi-miR319e +10_mismatch probe<br>vvi-miR319f -10_perfect match probe<br>vvi-miR319f -10_mismatch probe<br>vvi-miR319f 0_perfect match probe<br>vvi-miR319f 0_mismatch probe<br>vvi-miR319f +10_perfect match<br>probe |
| vvi miR-585 nat as                                                                                                                       | acagtagaaggagctccct                                                                                                                          |                                                                                                                                                                                                                        |

|                     |                       |                                     |
|---------------------|-----------------------|-------------------------------------|
| vvi miR-585 2mut as | acagtagaactgagctccct  | vvi-miR319f +10_mismatch probe      |
| vvi miR-586 nat as  | tcagtccaatgagtgggcaa  | vvi-miR319g -10_perfect match probe |
| vvi miR-586 2mut as | tcagtcaaatgagtgtgcaa  | vvi-miR319g -10_mismatch probe      |
| vvi miR-587 nat as  | ggagctcccttcagtccaat  | vvi-miR319g 0_perfect match probe   |
| vvi miR-587 2mut as | ggagctctcttcagtccaat  | vvi-miR319g 0_mismatch probe        |
| vvi miR-588 nat as  | atctgccctgggagctccct  | vvi-miR319g +10_perfect match probe |
| vvi miR-588 2mut as | atctgtcctgtgagctccct  | vvi-miR319g +10_mismatch probe      |
| vvi miR-589 nat as  | tcctgagcttaacagattct  | vvi-miR390 -10_perfect match probe  |
| vvi miR-589 2mut as | tcctgagtttaaagattct   | vvi-miR390 -10_mismatch probe       |
| vvi miR-590 nat as  | gcgctatccctcctgagctt  | vvi-miR390 0_perfect match probe    |
| vvi miR-590 2mut as | gcgctatctcttctgagctt  | vvi-miR390 0_mismatch probe         |
| vvi miR-591 nat as  | atggctcatggcctatccc   | vvi-miR390 +10_perfect match probe  |
| vvi miR-591 2mut as | atggttcattggcctatccc  | vvi-miR390 +10_mismatch probe       |
| vvi miR-592 nat as  | tccctttggaactgtccacc  | vvi-miR393a -10_perfect match probe |
| vvi miR-592 2mut as | tccctttcgaactgtccacc  | vvi-miR393a -10_mismatch probe      |
| vvi miR-593 nat as  | atcaatgcatccctttgga   | vvi-miR393a 0_perfect match probe   |
| vvi miR-593 2mut as | atcaatgagatctctttgga  | vvi-miR393a 0_mismatch probe        |
| vvi miR-594 nat as  | taacctgggatcaatgcga   | vvi-miR393a +10_perfect match probe |
| vvi miR-594 2mut as | taacctgtgataaatgcga   | vvi-miR393a +10_mismatch probe      |
| vvi miR-595 nat as  | tccctttggatgcctcctcc  | vvi-miR393b -10_perfect match probe |
| vvi miR-595 2mut as | tccctttcgatgtcctcctcc | vvi-miR393b -10_mismatch probe      |
| vvi miR-596 nat as  | atcaatgcatccctttgga   | vvi-miR393b 0_perfect match probe   |
| vvi miR-596 2mut as | atcaatgagatctctttgga  | vvi-miR393b 0_mismatch probe        |
| vvi miR-597 nat as  | agagtttgggatcaatgcga  | vvi-miR393b +10_perfect match probe |
| vvi miR-597 2mut as | agagtttgtgataaatgcga  | vvi-miR393b +10_mismatch probe      |
| vvi miR-598 nat as  | agaatgcaaaaatggctctg  | vvi-miR394a -10_perfect match probe |
| vvi miR-598 2mut as | agaatgtcaaaaatgcctctg | vvi-miR394a -10_mismatch probe      |

|                     |                       |                                     |
|---------------------|-----------------------|-------------------------------------|
| vvi miR-599 nat as  | tgatgtgcatggaggtggac  | vvi-miR394a +10_perfect match probe |
| vvi miR-599 2mut as | tgatgtgaatcgaggtggac  | vvi-miR394a +10_mismatch probe      |
| vvi miR-600 nat as  | agaatgccataaaactctgt  | vvi-miR394b -10_perfect match probe |
| vvi miR-600 2mut as | agaatgtcaataaattctgt  | vvi-miR394b -10_mismatch probe      |
| vvi miR-601 nat as  | tcaagagatgggaggtggac  | vvi-miR394b +10_perfect match probe |
| vvi miR-601 2mut as | tcaagagatctgaggtggac  | vvi-miR394b +10_mismatch probe      |
| vvi miR-602 nat as  | agaatgccccaaatggctctg | vvi-miR394c -10_perfect match probe |
| vvi miR-602 2mut as | agaatgtcaaaatgcctctg  | vvi-miR394c -10_mismatch probe      |
| vvi miR-603 nat as  | tggtatatatggaggtggac  | vvi-miR394c +10_perfect match probe |
| vvi miR-603 2mut as | tggtatataccgaggtggac  | vvi-miR394c +10_mismatch probe      |
| vvi miR-604 nat as  | aacacttcagtaggaagtca  | vvi-miR395a -10_perfect match probe |
| vvi miR-604 2mut as | aacacttcctagaaagtca   | vvi-miR395a -10_mismatch probe      |
| vvi miR-605 nat as  | agttccccaaacacttcag   | vvi-miR395a 0_perfect match probe   |
| vvi miR-605 2mut as | agttccctcaaaccttcag   | vvi-miR395a 0_mismatch probe        |
| vvi miR-606 nat as  | cggtaccaggagttccccca  | vvi-miR395a +10_perfect match probe |
| vvi miR-606 2mut as | cggtacaaggagttctccca  | vvi-miR395a +10_mismatch probe      |
| vvi miR-607 nat as  | aacacttcagtagtaggca   | vvi-miR395b -10_perfect match probe |
| vvi miR-607 2mut as | aacacttccttagtaggca   | vvi-miR395b -10_mismatch probe      |
| vvi miR-608 nat as  | agttccccaaacacttcag   | vvi-miR395b 0_perfect match probe   |
| vvi miR-608 2mut as | agttccctcaaaccttcag   | vvi-miR395b 0_mismatch probe        |
| vvi miR-609 nat as  | tggcaccaggagttccccca  | vvi-miR395b +10_perfect match probe |
| vvi miR-609 2mut as | tggcacaaggagttctccca  | vvi-miR395b +10_mismatch probe      |
| vvi miR-610 nat as  | aacacttcagtaggaagtca  | vvi-miR395c -10_perfect match probe |
| vvi miR-610 2mut as | aacacttcctagaaagtca   | vvi-miR395c -10_mismatch probe      |

|                     |                      |                                     |
|---------------------|----------------------|-------------------------------------|
| vvi miR-611 nat as  | agttcccccaaacacttcag | vvi-miR395c 0_perfect match probe   |
| vvi miR-611 2mut as | agttccctcaaaccttcag  | vvi-miR395c 0_mismatch probe        |
| vvi miR-612 nat as  | tggcaccaggagttccccca | vvi-miR395c +10_perfect match probe |
| vvi miR-612 2mut as | tggcacaaggagttctccca | vvi-miR395c +10_mismatch probe      |
| vvi miR-613 nat as  | aacacttcagtaggaagtca | vvi-miR395d -10_perfect match probe |
| vvi miR-613 2mut as | aacacttcctagaaagtca  | vvi-miR395d -10_mismatch probe      |
| vvi miR-614 nat as  | agttcccccaaacacttcag | vvi-miR395d 0_perfect match probe   |
| vvi miR-614 2mut as | agttccctcaaaccttcag  | vvi-miR395d 0_mismatch probe        |
| vvi miR-615 nat as  | tgacaccaggagttccccca | vvi-miR395d +10_perfect match probe |
| vvi miR-615 2mut as | tgacacaaggagttctccca | vvi-miR395d +10_mismatch probe      |
| vvi miR-616 nat as  | aacacttcagtaggaagtca | vvi-miR395e -10_perfect match probe |
| vvi miR-616 2mut as | aacacttcctagaaagtca  | vvi-miR395e -10_mismatch probe      |
| vvi miR-617 nat as  | agttcccccaaacacttcag | vvi-miR395e 0_perfect match probe   |
| vvi miR-617 2mut as | agttccctcaaaccttcag  | vvi-miR395e 0_mismatch probe        |
| vvi miR-618 nat as  | tggcaccaggagttccccca | vvi-miR395e +10_perfect match probe |
| vvi miR-618 2mut as | tggcacaaggagttctccca | vvi-miR395e +10_mismatch probe      |
| vvi miR-619 nat as  | aacacttcagtggaagtca  | vvi-miR395f -10_perfect match probe |
| vvi miR-619 2mut as | aacacttcctgtgaagtca  | vvi-miR395f -10_mismatch probe      |
| vvi miR-620 nat as  | agttcccccaaacacttcag | vvi-miR395f 0_perfect match probe   |
| vvi miR-620 2mut as | agttccctcaaaccttcag  | vvi-miR395f 0_mismatch probe        |
| vvi miR-621 nat as  | tgacaccaggagttccccca | vvi-miR395f +10_perfect match probe |
| vvi miR-621 2mut as | tgacacaaggagttctccca | vvi-miR395f +10_mismatch probe      |
| vvi miR-622 nat as  | aacacttcagtaggaattga | vvi-miR395g -10_perfect match probe |
| vvi miR-622 2mut as | aacacttcctagaaattga  | vvi-miR395g -10_mismatch probe      |
| vvi miR-623 nat as  | agttcccccaaacacttcag | vvi-miR395g 0_perfect match probe   |
| vvi miR-623 2mut as | agttccctcaaaccttcag  | vvi-miR395g 0_mismatch probe        |
| vvi miR-624 nat as  | tgacaccggagttccccca  | vvi-miR395g +10_perfect match probe |

|                     |                      |                                     |
|---------------------|----------------------|-------------------------------------|
| vvi miR-624 nat as  | tgacaccaggagttctccca | probe                               |
| vvi miR-624 2mut as |                      | vvi-miR395g +10_mismatch probe      |
| vvi miR-625 nat as  | aacacttcagtaggaagtca | vvi-miR395h -10_perfect match       |
| vvi miR-625 2mut as | aacacttcgtagaaagtca  | probe                               |
| vvi miR-626 nat as  | agttcccccaaacacttcag | vvi-miR395h -10_mismatch probe      |
| vvi miR-626 2mut as | agttccctcaaacccttcag | vvi-miR395h 0_perfect match probe   |
| vvi miR-627 nat as  | tagcaccaggagttccccca | vvi-miR395h 0_mismatch probe        |
| vvi miR-627 2mut as | tagcacaaggagttctccca | vvi-miR395h +10_perfect match       |
| vvi miR-628 nat as  | aacacttcagtaggaagtca | probe                               |
| vvi miR-628 2mut as | aacacttcgtagaaagtca  | vvi-miR395h +10_mismatch probe      |
| vvi miR-629 nat as  | agttcccccaaacacttcag | vvi-miR395i -10_perfect match probe |
| vvi miR-629 2mut as | agttccctcaaacccttcag | vvi-miR395i -10_mismatch probe      |
| vvi miR-630 nat as  | tgacaccaggagttccccca | vvi-miR395i 0_perfect match probe   |
| vvi miR-630 2mut as | tgacacaaggagttctccca | vvi-miR395i 0_mismatch probe        |
| vvi miR-631 nat as  | aacacttcagtaggaagtca | vvi-miR395i +10_perfect match       |
| vvi miR-631 2mut as | aacacttcgtagaaagtca  | probe                               |
| vvi miR-632 nat as  | agttcccccaaacacttcag | vvi-miR395i +10_mismatch probe      |
| vvi miR-632 2mut as | agttccctcaaacccttcag | vvi-miR395i +10_perfect match probe |
| vvi miR-633 nat as  | tgacaccaggagttccccca | vvi-miR395j -10_perfect match probe |
| vvi miR-633 2mut as | tgacacaaggagttctccca | vvi-miR395j -10_mismatch probe      |
| vvi miR-634 nat as  | aacacttcagtaggaagtca | vvi-miR395j 0_perfect match probe   |
| vvi miR-634 2mut as | aacacttcgtagaaagtca  | vvi-miR395j 0_mismatch probe        |
| vvi miR-635 nat as  | agttcccccaaacacttcag | vvi-miR395j +10_perfect match       |
| vvi miR-635 2mut as | agttccctcaaacccttcag | probe                               |
| vvi miR-636 nat as  | tggcaccaggagttccccca | vvi-miR395k -10_mismatch probe      |
| vvi miR-636 2mut as | tggcacaaggagttctccca | vvi-miR395k 0_perfect match probe   |
| vvi miR-637 nat as  | aacacttcagtaggaagtca | vvi-miR395k 0_mismatch probe        |
| vvi miR-637 2mut as | aacacttcgtagaaagtca  | vvi-miR395k +10_perfect match       |
|                     |                      | probe                               |
|                     |                      | vvi-miR395k +10_mismatch probe      |
|                     |                      | vvi-miR395l -10_perfect match probe |
|                     |                      | vvi-miR395l -10_mismatch probe      |

|                     |                      |                                     |
|---------------------|----------------------|-------------------------------------|
| vvi miR-638 nat as  | agttcccccaaacacttcag | vvi-miR395l 0_perfect match probe   |
| vvi miR-638 2mut as | agttccctcaaaccttcag  | vvi-miR395l 0_mismatch probe        |
| vvi miR-639 nat as  | tgacaccaggagtccccca  | vvi-miR395l +10_perfect match probe |
| vvi miR-639 2mut as | tgacacaaggagtctccca  | vvi-miR395l +10_mismatch probe      |
| vvi miR-640 nat as  | aacacttcagtaggaagtca | vvi-miR395m -10_perfect match probe |
| vvi miR-640 2mut as | aacacttccgtagaaagtca | vvi-miR395m -10_mismatch probe      |
| vvi miR-641 nat as  | agttcccccaaacacttcag | vvi-miR395m 0_perfect match probe   |
| vvi miR-641 2mut as | agttccctcaaaccttcag  | vvi-miR395m 0_mismatch probe        |
| vvi miR-642 nat as  | tggcaccaggagtccccca  | vvi-miR395m +10_perfect match probe |
| vvi miR-642 2mut as | tggcacaaggagtctccca  | vvi-miR395m +10_mismatch probe      |
| vvi miR-643 nat as  | gactcttcagtagaggaat  | vvi-miR395n -10_perfect match probe |
| vvi miR-643 2mut as | gactcttccgtagagaaaat | vvi-miR395n -10_mismatch probe      |
| vvi miR-644 nat as  | agttcctccagactcttcag | vvi-miR395n 0_perfect match probe   |
| vvi miR-644 2mut as | agttcctcaagcctcttcag | vvi-miR395n 0_mismatch probe        |
| vvi miR-645 nat as  | tggcaccaagagttctcca  | vvi-miR395n +10_perfect match probe |
| vvi miR-645 2mut as | tggcacaaaagatttctcca | vvi-miR395n +10_mismatch probe      |
| vvi miR-646 nat as  | gctgtgggaggacatggcaa | vvi-miR396a -10_perfect match probe |
| vvi miR-646 2mut as | gctgtgtgaggacatcgcaa | vvi-miR396a -10_mismatch probe      |
| vvi miR-647 nat as  | gctcaagaaagctgtgggag | vvi-miR396a 0_perfect match probe   |
| vvi miR-647 2mut as | gctcaacaaagttgtgggag | vvi-miR396a 0_mismatch probe        |
| vvi miR-648 nat as  | tgaaatagaagctcaagaaa | vvi-miR396a +10_perfect match probe |
| vvi miR-648 2mut as | tgaaatacaagttcaagaaa | vvi-miR396a +10_mismatch probe      |
| vvi miR-649 nat as  | gctgtgggaaacctggctt  | vvi-miR396b -10_perfect match probe |
| vvi miR-649 2mut as | gctgtgtgaaacctcgctt  | vvi-miR396b -10_mismatch probe      |
| vvi miR-650 nat as  | gttcaagaaagctgtgggaa | vvi-miR396b 0_perfect match probe   |
| vvi miR-650 2mut as | gttcaacaaagttgtgggaa | vvi-miR396b 0_mismatch probe        |

|                     |                       |                                   |
|---------------------|-----------------------|-----------------------------------|
| vvi miR-651 nat as  | atccactgaagttcaagaaa  | vvi-miR396b +10_perfect match     |
| vvi miR-651 2mut as | atcccctgaagttaagaaa   | probe                             |
|                     |                       | vvi-miR396b +10_mismatch probe    |
| vvi miR-652 nat as  | agctgtggaagatcacagaa  | vvi-miR396c -10_perfect match     |
| vvi miR-652 2mut as | agctgtcgaagatcccagaa  | probe                             |
| vvi miR-653 nat as  | agttcaagaaagctgtggaa  | vvi-miR396c -10_mismatch probe    |
| vvi miR-653 2mut as | agttaaagaaagttgtggaa  | vvi-miR396c 0_perfect match probe |
|                     |                       | vvi-miR396c 0_mismatch probe      |
| vvi miR-654 nat as  | cttccaaaacagttcaagaa  | vvi-miR396c +10_perfect match     |
| vvi miR-654 2mut as | cttcaaaaaccgttcaagaa  | probe                             |
|                     |                       | vvi-miR396c +10_mismatch probe    |
| vvi miR-655 nat as  | agctgtggaagaatacaaaag | vvi-miR396d -10_perfect match     |
| vvi miR-655 2mut as | agctgtcgaagaataaaaag  | probe                             |
| vvi miR-656 nat as  | agttcaagaaagctgtggaa  | vvi-miR396d -10_mismatch probe    |
| vvi miR-656 2mut as | agttaaagaaagttgtggaa  | vvi-miR396d 0_perfect match probe |
|                     |                       | vvi-miR396d 0_mismatch probe      |
| vvi miR-657 nat as  | tgaaaaatgcagttcaagaa  | vvi-miR396d +10_perfect match     |
| vvi miR-657 2mut as | tgaaaaatgacgttcaagaa  | probe                             |
|                     |                       | vvi-miR396d +10_mismatch probe    |
| vvi miR-658 nat as  | cactcaatgatgttttcttc  | vvi-miR397a -10_perfect match     |
| vvi miR-658 2mut as | cactcaataatcttttcttc  | probe                             |
| vvi miR-659 nat as  | atcaacgctgcactcaatga  | vvi-miR397a -10_mismatch probe    |
| vvi miR-659 2mut as | atcaaccctgaactcaatga  | vvi-miR397a 0_perfect match probe |
|                     |                       | vvi-miR397a 0_mismatch probe      |
| vvi miR-660 nat as  | cttcagtttcatcaacgctg  | vvi-miR397a +10_perfect match     |
| vvi miR-660 2mut as | cttcgtttcatcaaagctg   | probe                             |
|                     |                       | vvi-miR397a +10_mismatch probe    |
| vvi miR-661 nat as  | cactcaatgatgttttcttc  | vvi-miR397b -10_perfect match     |
| vvi miR-661 2mut as | cactcaataatcttttcttc  | probe                             |
| vvi miR-662 nat as  | atcaacgctgcactcaatga  | vvi-miR397b -10_mismatch probe    |
| vvi miR-662 2mut as | atcaaccctgaactcaatga  | vvi-miR397b 0_perfect match probe |
|                     |                       | vvi-miR397b 0_mismatch probe      |
| vvi miR-663 nat as  | cttcagtttcatcaacgctg  | vvi-miR397b +10_perfect match     |
|                     |                       | probe                             |

|                     |                      |                                     |
|---------------------|----------------------|-------------------------------------|
| vvi miR-663 2mut as | cttcggttcatcaaagctg  | vvi-miR397b +10_mismatch probe      |
| vvi miR-664 nat as  | tgagaacacaaaatgcatta | vvi-miR398a -10_perfect match probe |
| vvi miR-664 2mut as | tgagaacccaaaatgaatta | vvi-miR398a -10_mismatch probe      |
| vvi miR-665 nat as  | aggggtgacctgagaacaca | vvi-miR398a 0_perfect match probe   |
| vvi miR-665 2mut as | aggggtgatccgagaacaca | vvi-miR398a 0_mismatch probe        |
| vvi miR-666 nat as  | ggtgccccaaaggggtgacc | vvi-miR398a +10_perfect match probe |
| vvi miR-666 2mut as | ggtgtcccaaaggtgtgacc | vvi-miR398a +10_mismatch probe      |
| vvi miR-667 nat as  | tgagaacacatgagagcaaa | vvi-miR398b -10_perfect match probe |
| vvi miR-667 2mut as | tgagaacccatgagacaaa  | vvi-miR398b -10_mismatch probe      |
| vvi miR-668 nat as  | aggggcgacctgagaacaca | vvi-miR398b 0_perfect match probe   |
| vvi miR-668 2mut as | aggggagacccgagaacaca | vvi-miR398b 0_mismatch probe        |
| vvi miR-669 nat as  | ggagtccagcaggggcgacc | vvi-miR398b +10_perfect match probe |
| vvi miR-669 2mut as | ggagtccagaaggggagacc | vvi-miR398b +10_mismatch probe      |
| vvi miR-670 nat as  | tgagaacacatgagagcaaa | vvi-miR398c -10_perfect match probe |
| vvi miR-670 2mut as | tgagaacccatgagacaaa  | vvi-miR398c -10_mismatch probe      |
| vvi miR-671 nat as  | aggggcgacctgagaacaca | vvi-miR398c 0_perfect match probe   |
| vvi miR-671 2mut as | aggggagacccgagaacaca | vvi-miR398c 0_mismatch probe        |
| vvi miR-672 nat as  | ggagtccagcaggggcgacc | vvi-miR398c +10_perfect match probe |
| vvi miR-672 2mut as | ggagtccagaaggggagacc | vvi-miR398c +10_mismatch probe      |
| vvi miR-673 nat as  | tcctttggcagagcagctac | vvi-miR399a -10_perfect match probe |
| vvi miR-673 2mut as | tcctttgccagagaagctac | vvi-miR399a -10_mismatch probe      |
| vvi miR-674 nat as  | agggcaattctcctttggca | vvi-miR399a 0_perfect match probe   |
| vvi miR-674 2mut as | agggaaattcttctttggca | vvi-miR399a 0_mismatch probe        |
| vvi miR-675 nat as  | attgaataacagggaattc  | vvi-miR399a +10_perfect match probe |
| vvi miR-675 2mut as | attgaataaaaggccaattc | vvi-miR399a +10_mismatch probe      |
| vvi miR-676 nat as  | tcctttggcaagtcacatct | vvi-miR399b -10_perfect match probe |

|                     |                        |                                     |
|---------------------|------------------------|-------------------------------------|
| vvi miR-676 2mut as | tcctttgccaagtcccatct   | probe                               |
| vvi miR-677 nat as  | agggcaactctcctttggca   | vvi-miR399b -10_mismatch probe      |
| vvi miR-677 2mut as | agggaaaactcttctttggca  | vvi-miR399b 0_perfect match probe   |
|                     |                        | vvi-miR399b 0_mismatch probe        |
|                     |                        | vvi-miR399b +10_perfect match probe |
| vvi miR-678 nat as  | aagcagtcacagggcaactc   | vvi-miR399b +10_mismatch probe      |
| vvi miR-678 2mut as | aagcagtcaccaggccaactc  | vvi-miR399c -10_perfect match probe |
|                     |                        | vvi-miR399c -10_mismatch probe      |
| vvi miR-679 nat as  | tcctttggcagatcattcac   | vvi-miR399c 0_perfect match probe   |
| vvi miR-679 2mut as | tcctttgccagataattcac   | vvi-miR399c 0_mismatch probe        |
| vvi miR-680 nat as  | agggcaactctcctttggca   | vvi-miR399c +10_perfect match probe |
| vvi miR-680 2mut as | agggaaaactcttctttggca  | vvi-miR399c +10_mismatch probe      |
|                     |                        | vvi-miR399c +10_perfect match probe |
| vvi miR-681 nat as  | aaccagacacagggcaactc   | vvi-miR399c +10_mismatch probe      |
| vvi miR-681 2mut as | aaccagaccaggccaactc    | vvi-miR399d -10_perfect match probe |
|                     |                        | vvi-miR399d -10_mismatch probe      |
| vvi miR-682 nat as  | tcctttggcagacacactca   | vvi-miR399d 0_perfect match probe   |
| vvi miR-682 2mut as | tcctttgccagacacctca    | vvi-miR399d 0_mismatch probe        |
| vvi miR-683 nat as  | cgagcaaactctcctttggca  | vvi-miR399d +10_perfect match probe |
| vvi miR-683 2mut as | cgagaaaactcttctttggca  | vvi-miR399d +10_mismatch probe      |
|                     |                        | vvi-miR399d +10_perfect match probe |
| vvi miR-684 nat as  | gttaaattcacgagcaaactc  | vvi-miR399e -10_perfect match probe |
| vvi miR-684 2mut as | gttaaattcccagagaaaactc | vvi-miR399e -10_mismatch probe      |
|                     |                        | vvi-miR399e 0_perfect match probe   |
| vvi miR-685 nat as  | tcctttggcagagggcacac   | vvi-miR399e 0_mismatch probe        |
| vvi miR-685 2mut as | tcctttgccagagggccacac  | vvi-miR399e +10_perfect match probe |
| vvi miR-686 nat as  | cgggcaaactctcctttggca  | vvi-miR399e +10_mismatch probe      |
| vvi miR-686 2mut as | cgggaaaactcttctttggca  | vvi-miR399e +10_perfect match probe |
|                     |                        | vvi-miR399e +10_mismatch probe      |
| vvi miR-687 nat as  | gaagaattgccgggcaaactc  | vvi-miR399f -10_perfect match probe |
| vvi miR-687 2mut as | gaagaattgtcggccaaactc  | vvi-miR399f -10_mismatch probe      |
| vvi miR-688 nat as  | tccttcggcagcgagaagac   | vvi-miR399f 0_perfect match probe   |
| vvi miR-688 2mut as | tccttcgccagagagaagac   | vvi-miR399f 0_mismatch probe        |
| vvi miR-689 nat as  | aggacaaactctccttcggca  | vvi-miR399f 0_perfect match probe   |

|                     |                      |                                     |
|---------------------|----------------------|-------------------------------------|
| vvi miR-689 2mut as | aggaaaaatctccttaggca | vvi-miR399f 0_mismatch probe        |
| vvi miR-690 nat as  | gaagaattgcaggacaaatc | vvi-miR399f +10_perfect match probe |
| vvi miR-690 2mut as | gaagaattgaagaacaaatc | vvi-miR399f +10_mismatch probe      |
| vvi miR-691 nat as  | tcctttggcagtgcgcttag | vvi-miR399g -10_perfect match probe |
| vvi miR-691 2mut as | tcctttgccagtgcgcttag | vvi-miR399g -10_mismatch probe      |
| vvi miR-692 nat as  | ggggcaaatctcctttggca | vvi-miR399g 0_perfect match probe   |
| vvi miR-692 2mut as | ggggaaaatctcctttggca | vvi-miR399g 0_mismatch probe        |
| vvi miR-693 nat as  | gctgaattgaggggcaaatc | vvi-miR399g +10_perfect match probe |
| vvi miR-693 2mut as | gctgaattaaggggcaaatc | vvi-miR399g +10_mismatch probe      |
| vvi miR-694 nat as  | tcctttggcaaacagaagt  | vvi-miR399h -10_perfect match probe |
| vvi miR-694 2mut as | tcctttgcaaaaaagaagt  | vvi-miR399h -10_mismatch probe      |
| vvi miR-695 nat as  | agggcaattctcctttggca | vvi-miR399h 0_perfect match probe   |
| vvi miR-695 2mut as | agggaaattctcctttggca | vvi-miR399h 0_mismatch probe        |
| vvi miR-696 nat as  | agcgaatggcagggcaatc  | vvi-miR399h +10_perfect match probe |
| vvi miR-696 2mut as | agcgaatgccaggccaatc  | vvi-miR399h +10_mismatch probe      |
| vvi miR-697 nat as  | tcctttggcgggtcattgga | vvi-miR399i -10_perfect match probe |
| vvi miR-697 2mut as | tcctttggagtgtcattgga | vvi-miR399i -10_mismatch probe      |
| vvi miR-698 nat as  | agggcaactctcctttggcg | vvi-miR399i 0_perfect match probe   |
| vvi miR-698 2mut as | agggaaactctcctttggcg | vvi-miR399i 0_mismatch probe        |
| vvi miR-699 nat as  | aagtagtcacagggcaactc | vvi-miR399i +10_perfect match probe |
| vvi miR-699 2mut as | aagtagtcccaggccaactc | vvi-miR399i +10_mismatch probe      |
| vvi miR-700 nat as  | gtgaatctaaccgctcgaa  | vvi-miR403a -10_perfect match probe |
| vvi miR-700 2mut as | gtgaatttaaccccgtcgaa | vvi-miR403a -10_mismatch probe      |
| vvi miR-701 nat as  | gagtttgtgcgtgaatctaa | vvi-miR403a 0_perfect match probe   |
| vvi miR-701 2mut as | gagtttgtgactgaatctaa | vvi-miR403a 0_mismatch probe        |
| vvi miR-702 nat as  | cagaactcacgagtttgtgc | vvi-miR403a +10_perfect match probe |

|                     |                       |                                     |
|---------------------|-----------------------|-------------------------------------|
| vvi miR-702 2mut as | cagaactcaaaagtttgctgc | vvi-miR403a +10_mismatch probe      |
| vvi miR-703 nat as  | gtgaatctaacaccctttg   | vvi-miR403b -10_perfect match probe |
| vvi miR-703 2mut as | gtgaatttaacacctttg    | vvi-miR403b -10_mismatch probe      |
| vvi miR-704 nat as  | gagtttgctgctgaatctaa  | vvi-miR403b 0_perfect match probe   |
| vvi miR-704 2mut as | gagtttgactgaatctaa    | vvi-miR403b 0_mismatch probe        |
| vvi miR-705 nat as  | gacagatcccagtttgctgc  | vvi-miR403b +10_perfect match probe |
| vvi miR-705 2mut as | gacagatccaaagtttgctgc | vvi-miR403b +10_mismatch probe      |
| vvi miR-706 nat as  | gtgaatctaacggcgtcgaa  | vvi-miR403c -10_perfect match probe |
| vvi miR-706 2mut as | gtgaatttaacggagtcgaa  | vvi-miR403c -10_mismatch probe      |
| vvi miR-707 nat as  | gagtttgctgctgaatctaa  | vvi-miR403c 0_perfect match probe   |
| vvi miR-707 2mut as | gagtttgactgaatctaa    | vvi-miR403c 0_mismatch probe        |
| vvi miR-708 nat as  | gacagatcacgagtttgctgc | vvi-miR403c +10_perfect match probe |
| vvi miR-708 2mut as | gacagatcaaaagtttgctgc | vvi-miR403c +10_mismatch probe      |
| vvi miR-709 nat as  | gtgaatctaacaccctttg   | vvi-miR403d -10_perfect match probe |
| vvi miR-709 2mut as | gtgaatttaacacctttg    | vvi-miR403d -10_mismatch probe      |
| vvi miR-710 nat as  | gagtttgctgctgaatctaa  | vvi-miR403d 0_perfect match probe   |
| vvi miR-710 2mut as | gagtttgactgaatctaa    | vvi-miR403d 0_mismatch probe        |
| vvi miR-711 nat as  | gacagatcccagtttgctgc  | vvi-miR403d +10_perfect match probe |
| vvi miR-711 2mut as | gacagatccaaagtttgctgc | vvi-miR403d +10_mismatch probe      |
| vvi miR-712 nat as  | gtgaatctaacggcgtcgaa  | vvi-miR403e -10_perfect match probe |
| vvi miR-712 2mut as | gtgaatttaacggagtcgaa  | vvi-miR403e -10_mismatch probe      |
| vvi miR-713 nat as  | gagtttgctgctgaatctaa  | vvi-miR403e 0_perfect match probe   |
| vvi miR-713 2mut as | gagtttgactgaatctaa    | vvi-miR403e 0_mismatch probe        |
| vvi miR-714 nat as  | gacagatcgcgagtttgctgc | vvi-miR403e +10_perfect match probe |
| vvi miR-714 2mut as | gacagatcgaaagtttgctgc | vvi-miR403e +10_mismatch probe      |
| vvi miR-715 nat as  | gtgaatctaagaccatagaa  | vvi-miR403f -10_perfect match probe |

|                     |                       |                                     |
|---------------------|-----------------------|-------------------------------------|
| vvi miR-715 2mut as | gtgaatttaagacaatagaa  | vvi-miR403f -10_mismatch probe      |
| vvi miR-716 nat as  | gagtttgcgtgaatctaa    | vvi-miR403f 0_perfect match probe   |
| vvi miR-716 2mut as | gagtttgtgactgaatctaa  | vvi-miR403f 0_mismatch probe        |
|                     |                       | vvi-miR403f +10_perfect match probe |
| vvi miR-717 nat as  | gacagattacgagtttgtgc  | vvi-miR403f +10_mismatch probe      |
| vvi miR-717 2mut as | gacagattaaagtttgtgc   | vvi-miR408 -10_perfect match probe  |
| vvi miR-718 nat as  | ggcagtgcattggtagagca  | vvi-miR408 -10_mismatch probe       |
| vvi miR-718 2mut as | ggcagtgaatgttagagca   | vvi-miR408 0_perfect match probe    |
| vvi miR-719 nat as  | ccagggaagaggcagtgcat  | vvi-miR408 0_mismatch probe         |
| vvi miR-719 2mut as | ccagtgaagagccagtgcat  | vvi-miR408 +10_perfect match probe  |
| vvi miR-720 nat as  | agagacagagccagggaaga  | vvi-miR408 +10_mismatch probe       |
| vvi miR-720 2mut as | agagacagactcagggaaga  | vvi-miR477a -10_perfect match probe |
|                     |                       | vvi-miR477a -10_mismatch probe      |
| vvi miR-721 nat as  | tgaggagattgacaacttc   | vvi-miR477a 0_perfect match probe   |
| vvi miR-721 2mut as | tgagtgagattgaaaacttc  | vvi-miR477a 0_mismatch probe        |
| vvi miR-722 nat as  | tggaagccttgaggagat    | vvi-miR477a +10_perfect match probe |
| vvi miR-722 2mut as | tggaagtcttgagtgagat   | vvi-miR477a +10_mismatch probe      |
|                     |                       | vvi-miR477a +10_perfect match probe |
| vvi miR-723 nat as  | ccaggaaaattggaagcctt  | vvi-miR479 -10_perfect match probe  |
| vvi miR-723 2mut as | ccagaaaaattggaaccctt  | vvi-miR479 -10_mismatch probe       |
| vvi miR-724 nat as  | caataccacaccatgtctac  | vvi-miR479 0_perfect match probe    |
| vvi miR-724 2mut as | caatacaacacaatgtctac  | vvi-miR479 0_mismatch probe         |
| vvi miR-725 nat as  | tgagccgaaccaataaccaca | vvi-miR479 +10_perfect match probe  |
| vvi miR-725 2mut as | tgagtccaacaataaccaca  | vvi-miR479 +10_mismatch probe       |
| vvi miR-726 nat as  | tgaaagaagatgagccgaac  | vvi-miR482a -10_perfect match probe |
| vvi miR-726 2mut as | tgaaagaacatgagtcgaac  | vvi-miR482a -10_mismatch probe      |
|                     |                       | vvi-miR482a 0_perfect match probe   |
| vvi miR-727 nat as  | gaggagtaggaaagactagc  | vvi-miR482a 0_mismatch probe        |
| vvi miR-727 2mut as | gaggagtagaaaagcctagc  | vvi-miR482a +10_perfect match probe |
| vvi miR-728 nat as  | ataggaatgggaggagtagg  | vvi-miR482a +10_mismatch probe      |
| vvi miR-728 2mut as | ataggaatgtgagaagtagg  |                                     |
|                     |                       |                                     |
| vvi miR-729 nat as  | gaaaacaataggaatgg     |                                     |
| vvi miR-729 2mut as | gaaaaaatagaaatgg      |                                     |

|                     |                        |                                   |
|---------------------|------------------------|-----------------------------------|
| vvi miR-730 nat as  | ctcgttgcaagcaattaca    | vvi-miR535a -10_perfect match     |
| vvi miR-730 2mut as | ctcgttctcaagaaattaca   | probe                             |
| vvi miR-731 nat as  | cgtgctctctcctgttgca    | vvi-miR535a -10_mismatch probe    |
| vvi miR-731 2mut as | cgtgttctctctcctgtgca   | vvi-miR535a 0_perfect match probe |
|                     |                        | vvi-miR535a 0_mismatch probe      |
|                     |                        | vvi-miR535a +10_perfect match     |
|                     |                        | probe                             |
| vvi miR-732 nat as  | tgctgactagcgtgctctct   | vvi-miR535a +10_mismatch probe    |
| vvi miR-732 2mut as | tgctgactacagtgtctctct  | vvi-miR535b -10_perfect match     |
|                     |                        | probe                             |
| vvi miR-733 nat as  | ctcgttgcaagcaattaca    | vvi-miR535b -10_mismatch probe    |
| vvi miR-733 2mut as | ctcgttctcaagaaattaca   | vvi-miR535b 0_perfect match probe |
| vvi miR-734 nat as  | cgtgctctctcctgttgca    | vvi-miR535b 0_mismatch probe      |
| vvi miR-734 2mut as | cgtgttctctctcctgtgca   | vvi-miR535b +10_perfect match     |
|                     |                        | probe                             |
| vvi miR-735 nat as  | tgctgactagcgtgctctct   | vvi-miR535b +10_mismatch probe    |
| vvi miR-735 2mut as | tgctgactacagtgtctctct  | vvi-miR535c -10_perfect match     |
|                     |                        | probe                             |
| vvi miR-736 nat as  | ctcgttgcaagcaattaca    | vvi-miR535c -10_mismatch probe    |
| vvi miR-736 2mut as | ctcgttctcaagaaattaca   | vvi-miR535c 0_perfect match probe |
| vvi miR-737 nat as  | cgtgctctctcctgttgca    | vvi-miR535c 0_mismatch probe      |
| vvi miR-737 2mut as | cgtgttctctctcctgtgca   | vvi-miR535c +10_perfect match     |
|                     |                        | probe                             |
| vvi miR-738 nat as  | tgctgactagcgtgctctct   | vvi-miR535c +10_mismatch probe    |
| vvi miR-738 2mut as | tgctgactacagtgtctctct  | vvi-miR535d -10_perfect match     |
|                     |                        | probe                             |
| vvi miR-739 nat as  | ctcgttgcaagcaattaca    | vvi-miR535d -10_mismatch probe    |
| vvi miR-739 2mut as | ctcgttctcaagaaattaca   | vvi-miR535d 0_perfect match probe |
| vvi miR-740 nat as  | cgtgctctctcctgttgca    | vvi-miR535d 0_mismatch probe      |
| vvi miR-740 2mut as | cgtgttctctctcctgtgca   | vvi-miR535d +10_perfect match     |
|                     |                        | probe                             |
| vvi miR-741 nat as  | tgccagactagcgtgctctct  | vvi-miR535d +10_mismatch probe    |
| vvi miR-741 2mut as | tgccagactacagtgtctctct | vvi-miR535e -10_perfect match     |
|                     |                        | probe                             |
| vvi miR-742 nat as  | ctcgttgcaagcaattaca    |                                   |

|                     |                      |                                     |
|---------------------|----------------------|-------------------------------------|
| vvi miR-742 2mut as | ctcgttctcaagaaattaca | vvi-miR535e -10_mismatch probe      |
| vvi miR-743 nat as  | cgtgctctctcgttgca    | vvi-miR535e 0_perfect match probe   |
| vvi miR-743 2mut as | cgtgttctctctccttgca  | vvi-miR535e 0_mismatch probe        |
| vvi miR-744 nat as  | tgcagactagcgtgctctct | vvi-miR535e +10_perfect match probe |
| vvi miR-744 2mut as | tgcagactacagtgctctct | vvi-miR535e +10_mismatch probe      |
| vvi miR-745 nat as  | ttgagcaagaaactttata  | vvi-miR828a -10_perfect match probe |
| vvi miR-745 2mut as | ttgagaaagaaattttata  | vvi-miR828a -10_mismatch probe      |
| vvi miR-746 nat as  | gaatactcatttgagcaaga | vvi-miR828a 0_perfect match probe   |
| vvi miR-746 2mut as | gaatactaatttgagaaaga | vvi-miR828a 0_mismatch probe        |
| vvi miR-747 nat as  | ctgttgtttgaataactcat | vvi-miR828a +10_perfect match probe |
| vvi miR-747 2mut as | ctgttgtttcaaatactcat | vvi-miR828a +10_mismatch probe      |
| vvi miR-748 nat as  | ttgagcaagaaaccaagagc | vvi-miR828b -10_perfect match probe |
| vvi miR-748 2mut as | ttgagaaagaaacaagagc  | vvi-miR828b -10_mismatch probe      |
| vvi miR-749 nat as  | gaacactcatttgagcaaga | vvi-miR828b 0_perfect match probe   |
| vvi miR-749 2mut as | gaaccctcatttgagaaaga | vvi-miR828b 0_mismatch probe        |
| vvi miR-750 nat as  | ggttgatgtggaacactcat | vvi-miR828b +10_perfect match probe |
| vvi miR-750 2mut as | ggttgatgtcaaacactcat | vvi-miR828b +10_mismatch probe      |
| vvi miR-751 nat as  | atcagagctagacctcttgc | vvi-miR845a -10_perfect match probe |
| vvi miR-751 2mut as | atcagagttagatctcttgc | vvi-miR845a -10_mismatch probe      |
| vvi miR-752 nat as  | atcaattggtatcagagcta | vvi-miR845a 0_perfect match probe   |
| vvi miR-752 2mut as | atcaattcgtatccgagcta | vvi-miR845a 0_mismatch probe        |
| vvi miR-753 nat as  | cctttgtttatcaattggt  | vvi-miR845a +10_perfect match probe |
| vvi miR-753 2mut as | cctttctttataaattggt  | vvi-miR845a +10_mismatch probe      |
| vvi miR-754 nat as  | atcagagctagacctcttgc | vvi-miR845b -10_perfect match probe |
| vvi miR-754 2mut as | atcagagttagatctcttgc | vvi-miR845b -10_mismatch probe      |
| vvi miR-755 nat as  | atcaattggtatcagagcta | vvi-miR845b 0_perfect match probe   |

|                     |                       |                                     |
|---------------------|-----------------------|-------------------------------------|
| vvi miR-755 2mut as | atcaattcgtatccgagcta  | vvi-miR845b 0_mismatch probe        |
| vvi miR-756 nat as  | cctttgtttatcaattggt   | vvi-miR845b +10_perfect match probe |
| vvi miR-756 2mut as | cctttctttataaattggt   | vvi-miR845b +10_mismatch probe      |
| vvi miR-757 nat as  | atcagagcctcatgtttaat  | vvi-miR845c -10_perfect match probe |
| vvi miR-757 2mut as | atcagagtctcatctttaat  | vvi-miR845c -10_mismatch probe      |
| vvi miR-758 nat as  | atcaattggatcagagcct   | vvi-miR845c 0_perfect match probe   |
| vvi miR-758 2mut as | atcaattcgtatccgagcct  | vvi-miR845c 0_mismatch probe        |
| vvi miR-759 nat as  | tggtttatgcatcaattggt  | vvi-miR845c +10_perfect match probe |
| vvi miR-759 2mut as | tggtttatgaataaattggt  | vvi-miR845c +10_mismatch probe      |
| vvi miR-760 nat as  | atcagagccataggttagta  | vvi-miR845d -10_perfect match probe |
| vvi miR-760 2mut as | atcagagtcatagcttagta  | vvi-miR845d -10_mismatch probe      |
| vvi miR-761 nat as  | atcaattggatcagagcca   | vvi-miR845d 0_perfect match probe   |
| vvi miR-761 2mut as | atcaattcgtatccgagcca  | vvi-miR845d 0_mismatch probe        |
| vvi miR-762 nat as  | ggttttcccatcaattggt   | vvi-miR845d +10_perfect match probe |
| vvi miR-762 2mut as | ggttttctcataaattggt   | vvi-miR845d +10_mismatch probe      |
| vvi miR-763 nat as  | atcagagccataggttagta  | vvi-miR845e -10_perfect match probe |
| vvi miR-763 2mut as | atcagagtcatagcttagta  | vvi-miR845e -10_mismatch probe      |
| vvi miR-764 nat as  | atcaattggatcagagcca   | vvi-miR845e 0_perfect match probe   |
| vvi miR-764 2mut as | atcaattcgtatccgagcca  | vvi-miR845e 0_mismatch probe        |
| vvi miR-765 nat as  | agttttcccatcaattggt   | vvi-miR845e +10_perfect match probe |
| vvi miR-765 2mut as | agttttctcataaattggt   | vvi-miR845e +10_mismatch probe      |
| vvi miR-766 nat as  | tgacagaagaagagagagcac | vvi-miR156a *_perfect match probe   |
| vvi miR-766 2mut as | tgaccgaagaagagagcgcac | vvi-miR156a *_mismatch probe        |
| vvi miR-767 nat as  | tgacagaagagaaatgagcac | vvi-miR156b *_perfect match probe   |
| vvi miR-767 2mut as | tgaccgaagagaaataagcac | vvi-miR156b *_mismatch probe        |
| vvi miR-768 nat as  | tgacagatagagagtgagcac | vvi-miR156c *_perfect match probe   |
| vvi miR-768 2mut as | tgaccgatagagagcgagcac | vvi-miR156c *_mismatch probe        |

vvi|miR-769|nat|as|  
vvi|miR-769|2mut|as|  
vvi|miR-770|nat|as|  
vvi|miR-770|2mut|as|  
vvi|miR-771|nat|as|  
vvi|miR-771|2mut|as|  
vvi|miR-772|nat|as|  
vvi|miR-772|2mut|as|  
vvi|miR-773|nat|as|  
vvi|miR-773|2mut|as|  
vvi|miR-774|nat|as|  
vvi|miR-774|2mut|as|  
vvi|miR-775|nat|as|  
vvi|miR-775|2mut|as|  
vvi|miR-776|nat|as|  
vvi|miR-776|2mut|as|  
vvi|miR-777|nat|as|  
vvi|miR-777|2mut|as|  
vvi|miR-778|nat|as|  
vvi|miR-778|2mut|as|  
vvi|miR-779|nat|as|  
vvi|miR-779|2mut|as|  
vvi|miR-780|nat|as|  
vvi|miR-780|2mut|as|  
vvi|miR-781|nat|as|  
vvi|miR-781|2mut|as|  
vvi|miR-782|nat|as|  
vvi|miR-782|2mut|as|  
vvi|miR-783|nat|as|  
vvi|miR-783|2mut|as|  
vvi|miR-784|nat|as|  
vvi|miR-784|2mut|as|  
vvi|miR-785|nat|as|  
vvi|miR-785|2mut|as|

tgacagaaagagaggtgagcac  
tgaccgaaagagagctgagcac  
tgacagatagggagtaagcac  
tgacagatagtaagtaagcac  
ttgacaggagaagagagaggac  
ttgacagaagaagagagcggac  
tgacagaagtctagagagcac  
tgacagaagcctagagcgcac  
tgaaaggcgcgaaagaac  
tgaaaggccccgaaagaac  
tgacagaagaatagagagcac  
tgaccgaagaatagagcgcac  
ctggagcgtaaaggagctccc  
ctggagagtaaaggagtccc  
ctggagtgtaaagaagctccca  
ctggagcgtaaagaagtccca  
ttggactcaaggagctcca  
ttggcctcaaggagtcca  
tgcattgactcctctgatgcca  
tgcattgactcctccgatgcca  
tgcttgactcccctcatgcca  
tgcttgactctctcatgcca  
tgcttgactcctcgcacgcca  
tgcttgactcctcccacgcca  
tgcattgactcctcgcacgcca  
tgcattgactcctcccacgcca  
tgcttgactcccctcatgcca  
tgcttgactctctcatgcca  
tgcattgactcctcatacgcca  
tgcattgactcctcataagcca  
tcgatgaaccgctgatccag  
tcgatgaaccctgaatccag  
tgagagaagggagcacgtgc  
tgagagaaggtgagaacgtgc

vvi-miR156d|\*\_perfect match probe  
vvi-miR156d|\*\_mismatch probe  
vvi-miR156e|\*\_perfect match probe  
vvi-miR156e|\*\_mismatch probe  
vvi-miR156f|\*\_perfect match probe  
vvi-miR156f|\*\_mismatch probe  
vvi-miR156g|\*\_perfect match probe  
vvi-miR156g|\*\_mismatch probe  
vvi-miR156h|\*\_perfect match probe  
vvi-miR156h|\*\_mismatch probe  
vvi-miR156i|\*\_perfect match probe  
vvi-miR156i|\*\_mismatch probe  
vvi-miR159a|\*\_perfect match probe  
vvi-miR159a|\*\_mismatch probe  
vvi-miR159b|\*\_perfect match probe  
vvi-miR159b|\*\_mismatch probe  
vvi-miR159c|\*\_perfect match probe  
vvi-miR159c|\*\_mismatch probe  
vvi-miR160a|\*\_perfect match probe  
vvi-miR160a|\*\_mismatch probe  
vvi-miR160b|\*\_perfect match probe  
vvi-miR160b|\*\_mismatch probe  
vvi-miR160c|\*\_perfect match probe  
vvi-miR160c|\*\_mismatch probe  
vvi-miR160d|\*\_perfect match probe  
vvi-miR160d|\*\_mismatch probe  
vvi-miR160e|\*\_perfect match probe  
vvi-miR160e|\*\_mismatch probe  
vvi-miR160f|\*\_perfect match probe  
vvi-miR160f|\*\_mismatch probe  
vvi-miR162|\*\_perfect match probe  
vvi-miR162|\*\_mismatch probe  
vvi-miR164a|\*\_perfect match probe  
vvi-miR164a|\*\_mismatch probe

vvi|miR-786|nat|as|  
vvi|miR-786|2mut|as|  
vvi|miR-787|nat|as|  
vvi|miR-787|2mut|as|  
vvi|miR-788|nat|as|  
vvi|miR-788|2mut|as|  
vvi|miR-789|nat|as|  
vvi|miR-789|2mut|as|  
vvi|miR-790|nat|as|  
vvi|miR-790|2mut|as|  
vvi|miR-791|nat|as|  
vvi|miR-791|2mut|as|  
vvi|miR-792|nat|as|  
vvi|miR-792|2mut|as|  
vvi|miR-793|nat|as|  
vvi|miR-793|2mut|as|  
vvi|miR-794|nat|as|  
vvi|miR-794|2mut|as|  
vvi|miR-795|nat|as|  
vvi|miR-795|2mut|as|  
vvi|miR-796|nat|as|  
vvi|miR-796|2mut|as|  
vvi|miR-797|nat|as|  
vvi|miR-797|2mut|as|  
vvi|miR-798|nat|as|  
vvi|miR-798|2mut|as|  
vvi|miR-799|nat|as|  
vvi|miR-799|2mut|as|  
vvi|miR-800|nat|as|  
vvi|miR-800|2mut|as|  
vvi|miR-801|nat|as|  
vvi|miR-801|2mut|as|  
vvi|miR-802|nat|as|  
vvi|miR-802|2mut|as|

ggagagccagggcacatg  
ggagagtcagggcacatg  
tggagaaggggagcacgtgca  
tggagaaggtgagaacgtgca  
tcgagccagacaacattcccc  
tcgagtcagacaaaattcccc  
tcgagccagacaacaattcccc  
tcgagtcagacaacaattccct  
tcgagccagacaacattcccc  
tcgagtcagacaaaattcccc  
tcgagccagccaacattcccc  
tcgagccagtcaaaattcccc  
tcgaaccagacaacattccct  
tcgaacaagacaacattccct  
tcgaaccagacagcgtcccc  
tcgaacaagacagagtcccc  
ttggatcaaactcattccaa  
ttggatcaaatcattccaa  
tcgagccagccaacattcccc  
tcgagccagtcaaaattcccc  
tgaagctgcaagatgacctg  
tgaagctgaaagatgcctg  
tgaaactgccacatgatcta  
tgaaactgtcccatgatcta  
tgaggctaccacatgatct  
tgagcctaccccatgatct  
tgaggctgtcagggcatgaccta  
tgagcctgtcaggccatgaccta  
tgaaactgccacatgatct  
tgaaactgtcccatgatct  
tcagttgatgcaaggcggga  
tcagttgatccaaggaggga  
agccaaggacaactgccag  
agccaagaacaactcccag

vvi-miR164b|\*\_perfect match probe  
vvi-miR164b|\*\_mismatch probe  
vvi-miR164d|\*\_perfect match probe  
vvi-miR164d|\*\_mismatch probe  
vvi-miR166c|\*\_perfect match probe  
vvi-miR166c|\*\_mismatch probe  
vvi-miR166d|\*\_perfect match probe  
vvi-miR166d|\*\_mismatch probe  
vvi-miR166e|\*\_perfect match probe  
vvi-miR166e|\*\_mismatch probe  
vvi-miR166f|\*\_perfect match probe  
vvi-miR166f|\*\_mismatch probe  
vvi-miR166g|\*\_perfect match probe  
vvi-miR166g|\*\_mismatch probe  
vvi-miR166h|\*\_perfect match probe  
vvi-miR166h|\*\_mismatch probe  
vvi-miR166a|\*\_perfect match probe  
vvi-miR166a|\*\_mismatch probe  
vvi-miR166b|\*\_perfect match probe  
vvi-miR166b|\*\_mismatch probe  
vvi-miR167a|\*\_perfect match probe  
vvi-miR167a|\*\_mismatch probe  
vvi-miR167b|\*\_perfect match probe  
vvi-miR167b|\*\_mismatch probe  
vvi-miR167c|\*\_perfect match probe  
vvi-miR167c|\*\_mismatch probe  
vvi-miR167d|\*\_perfect match probe  
vvi-miR167d|\*\_mismatch probe  
vvi-miR167e|\*\_perfect match probe  
vvi-miR167e|\*\_mismatch probe  
vvi-miR168|\*\_perfect match probe  
vvi-miR168|\*\_mismatch probe  
vvi-miR169a|\*\_perfect match probe  
vvi-miR169a|\*\_mismatch probe

vvi|miR-803|nat|as|  
vvi|miR-803|2mut|as|  
vvi|miR-804|nat|as|  
vvi|miR-804|2mut|as|  
vvi|miR-805|nat|as|  
vvi|miR-805|2mut|as|  
vvi|miR-806|nat|as|  
vvi|miR-806|2mut|as|  
vvi|miR-807|nat|as|  
vvi|miR-807|2mut|as|  
vvi|miR-808|nat|as|  
vvi|miR-808|2mut|as|  
vvi|miR-809|nat|as|  
vvi|miR-809|2mut|as|  
vvi|miR-810|nat|as|  
vvi|miR-810|2mut|as|  
vvi|miR-811|nat|as|  
vvi|miR-811|2mut|as|  
vvi|miR-812|nat|as|  
vvi|miR-812|2mut|as|  
vvi|miR-813|nat|as|  
vvi|miR-813|2mut|as|  
vvi|miR-814|nat|as|  
vvi|miR-814|2mut|as|  
vvi|miR-815|nat|as|  
vvi|miR-815|2mut|as|  
vvi|miR-816|nat|as|  
vvi|miR-816|2mut|as|  
vvi|miR-817|nat|as|  
vvi|miR-817|2mut|as|  
vvi|miR-818|nat|as|  
vvi|miR-818|2mut|as|  
vvi|miR-819|nat|as|  
vvi|miR-819|2mut|as|

tgccaaggagacttgcc  
tgccaagaagccttgcc  
gagccaaggatgactaacgg  
gagcaaaggatgcctaaccg  
agccaaggacaacttgccgg  
agccaagaacaacttcccgg  
agccaaggacaactgccag  
agccaagaacaacttcccag  
ttagccaaggtgactgcctg  
ttagtcaaggtgactccctg  
agccaaacacaacttgcc  
agccaaaccaaacttgcc  
agccaaagacaacttgcc  
agccaaagcaaacttgcc  
gagtcaaggataacctccg  
gagtcaagaataactctccg  
gagacagggataaccagccgt  
gagacagtgataaccaccgt  
agccaaggacaacctgccag  
agccaagaacaacctcccag  
agccaaggacaacctgccag  
agccaagaacaacctcccag  
gagccaagaataactagccgt  
gagcaaagaataactaccgt  
gagcctcggatgcttgccag  
gagcctcagatgcttcccag  
gagcctcagatgcttgccagtatg  
gagcctcagatcctgtcagttatg  
gagccaagaataactcgtgtc  
gagcaaagaataactcctgtc  
gagcctcggatgcttgccag  
gagcctcagatgcttcccag  
gagccaggattacatgccgg  
gagcaaggattacatcccgg

vvi-miR169y|\*\_perfect match probe  
vvi-miR169y|\*\_mismatch probe  
vvi-miR169b|\*\_perfect match probe  
vvi-miR169b|\*\_mismatch probe  
vvi-miR169c|\*\_perfect match probe  
vvi-miR169c|\*\_mismatch probe  
vvi-miR169d|\*\_perfect match probe  
vvi-miR169d|\*\_mismatch probe  
vvi-miR169e|\*\_perfect match probe  
vvi-miR169e|\*\_mismatch probe  
vvi-miR169f|\*\_perfect match probe  
vvi-miR169f|\*\_mismatch probe  
vvi-miR169g|\*\_perfect match probe  
vvi-miR169g|\*\_mismatch probe  
vvi-miR169h|\*\_perfect match probe  
vvi-miR169h|\*\_mismatch probe  
vvi-miR169i|\*\_perfect match probe  
vvi-miR169i|\*\_mismatch probe  
vvi-miR169j|\*\_perfect match probe  
vvi-miR169j|\*\_mismatch probe  
vvi-miR169k|\*\_perfect match probe  
vvi-miR169k|\*\_mismatch probe  
vvi-miR169l|\*\_perfect match probe  
vvi-miR169l|\*\_mismatch probe  
vvi-miR169m|\*\_perfect match probe  
vvi-miR169m|\*\_mismatch probe  
vvi-miR169n|\*\_perfect match probe  
vvi-miR169n|\*\_mismatch probe  
vvi-miR169o|\*\_perfect match probe  
vvi-miR169o|\*\_mismatch probe  
vvi-miR169p|\*\_perfect match probe  
vvi-miR169p|\*\_mismatch probe  
vvi-miR169q|\*\_perfect match probe  
vvi-miR169q|\*\_mismatch probe

vvi|miR-820|nat|as|  
vvi|miR-820|2mut|as|  
vvi|miR-821|nat|as|  
vvi|miR-821|2mut|as|  
vvi|miR-822|nat|as|  
vvi|miR-822|2mut|as|  
vvi|miR-823|nat|as|  
vvi|miR-823|2mut|as|  
vvi|miR-824|nat|as|  
vvi|miR-824|2mut|as|  
vvi|miR-825|nat|as|  
vvi|miR-825|2mut|as|  
vvi|miR-826|nat|as|  
vvi|miR-826|2mut|as|  
vvi|miR-827|nat|as|  
vvi|miR-827|2mut|as|  
vvi|miR-828|nat|as|  
vvi|miR-828|2mut|as|  
vvi|miR-829|nat|as|  
vvi|miR-829|2mut|as|  
vvi|miR-830|nat|as|  
vvi|miR-830|2mut|as|  
vvi|miR-831|nat|as|  
vvi|miR-831|2mut|as|  
vvi|miR-832|nat|as|  
vvi|miR-832|2mut|as|  
vvi|miR-833|nat|as|  
vvi|miR-833|2mut|as|  
vvi|miR-834|nat|as|  
vvi|miR-834|2mut|as|  
vvi|miR-835|nat|as|  
vvi|miR-835|2mut|as|  
vvi|miR-836|nat|as|  
vvi|miR-836|2mut|as|

tgagtcaagtcaacttgccg  
tgagtcaagcaacttgccg  
agccaggaacaacttgccgg  
agccagaaacaacttcccgg  
gagtcaagtcaacttgccg  
gagtcaagccaattgccc  
gagtcaagtcaacttgccc  
gagtcaagccaattgccc  
agccaagaaataaattgccga  
agccaacaataaattcccga  
agctaagaatgactcgccga  
agctaacaatgactcccga  
tagccgaaggaatgactgccta  
tagcagaaggaatgactcccta  
ttgagccgtgccaatatcatg  
ttgagccgtgtaaatatcatg  
aattgaggcacgccaataacc  
aattgagccacccaataacc  
ttgaaccgcaccaatatcccg  
ttgaaccccacaaatatcccg  
ttgaaccgtataaatatctcg  
ttgaacagtataaatatctcg  
gattgaacctcacaacatc  
gattgaatctcacaacatc  
ttgaacctcacaacatcgct  
ttgaacctcataacatcgct  
ccgatggaaccaacat  
ccgatcgaaccaacat  
ggttgaaccgcaccaacatc  
ggttgaaccaaccaacatc  
ttgagccattccaacatcccc  
ttgagtcattccaacatcccc  
gaatcttgatgatgetgcat  
gaatcttaatgatcctgcat

vvi-miR169r|\*\_perfect match probe  
vvi-miR169r|\*\_mismatch probe  
vvi-miR169s|\*\_perfect match probe  
vvi-miR169s|\*\_mismatch probe  
vvi-miR169t|\*\_perfect match probe  
vvi-miR169t|\*\_mismatch probe  
vvi-miR169u|\*\_perfect match probe  
vvi-miR169u|\*\_mismatch probe  
vvi-miR169v|\*\_perfect match probe  
vvi-miR169v|\*\_mismatch probe  
vvi-miR169w|\*\_perfect match probe  
vvi-miR169w|\*\_mismatch probe  
vvi-miR169x|\*\_perfect match probe  
vvi-miR169x|\*\_mismatch probe  
vvi-miR171a|\*\_perfect match probe  
vvi-miR171a|\*\_mismatch probe  
vvi-miR171b|\*\_perfect match probe  
vvi-miR171b|\*\_mismatch probe  
vvi-miR171c|\*\_perfect match probe  
vvi-miR171c|\*\_mismatch probe  
vvi-miR171d|\*\_perfect match probe  
vvi-miR171d|\*\_mismatch probe  
vvi-miR171e|\*\_perfect match probe  
vvi-miR171e|\*\_mismatch probe  
vvi-miR171f|\*\_perfect match probe  
vvi-miR171f|\*\_mismatch probe  
vvi-miR171g|\*\_perfect match probe  
vvi-miR171g|\*\_mismatch probe  
vvi-miR171h|\*\_perfect match probe  
vvi-miR171h|\*\_mismatch probe  
vvi-miR171i|\*\_perfect match probe  
vvi-miR171i|\*\_mismatch probe  
vvi-miR172a|\*\_perfect match probe  
vvi-miR172a|\*\_mismatch probe

vvi|miR-837|nat|as|  
vvi|miR-837|2mut|as|  
vvi|miR-838|nat|as|  
vvi|miR-838|2mut|as|  
vvi|miR-839|nat|as|  
vvi|miR-839|2mut|as|  
vvi|miR-840|nat|as|  
vvi|miR-840|2mut|as|  
vvi|miR-841|nat|as|  
vvi|miR-841|2mut|as|  
vvi|miR-842|nat|as|  
vvi|miR-842|2mut|as|  
vvi|miR-843|nat|as|  
vvi|miR-843|2mut|as|  
vvi|miR-844|nat|as|  
vvi|miR-844|2mut|as|  
vvi|miR-845|nat|as|  
vvi|miR-845|2mut|as|  
vvi|miR-846|nat|as|  
vvi|miR-846|2mut|as|  
vvi|miR-847|nat|as|  
vvi|miR-847|2mut|as|  
vvi|miR-848|nat|as|  
vvi|miR-848|2mut|as|  
vvi|miR-849|nat|as|  
vvi|miR-849|2mut|as|  
vvi|miR-850|nat|as|  
vvi|miR-850|2mut|as|  
vvi|miR-851|nat|as|  
vvi|miR-851|2mut|as|  
vvi|miR-852|nat|as|  
vvi|miR-852|2mut|as|  
vvi|miR-853|nat|as|  
vvi|miR-853|2mut|as|

gaatcttgatgatgctgca  
gaatcttaatgatcctgca  
gaatcttgatgatgctcca  
gaatcttaatgatcctcca  
gaatcttgatgatgctgcat  
gaatcttaatgatcctgcat  
ctggactaaagagagctcc  
ctggcctaaagagacctcc  
tggactgaagaaagctctc  
tggaccgaagaaagtctc  
ttgggctgcaaaggaacccc  
ttggcctgcaaaggaatcccc  
tggactgaaggaagctctc  
tggactgaacgaagtctc  
attggactaaaaggagctc  
attgaactaaaagaagctc  
aaactcaggatagatagcgcc  
aaactcagaatagataccgcc  
tcctaagggatagcatgatcc  
tcctaagtgatagaatgatcc  
tccaaagggatagcatgatcc  
tccaaagtgatagaatgatcc  
ttggcatgctggccacctcc  
ttggcatcctggtcacctcc  
ttggcagtatgccacctcc  
ttggaagtatgtccacctcc  
ttggcatcctggcgcctcc  
ttggaatcctggccccctcc  
tgaagtgatcaagggaactc  
tgaagcgatcaagtgaactc  
tgaagtggtaagggaactc  
tgaagtcgtaagggaactc  
tgaagtggtaagggaactc  
tgaagtcgtaagggaactc

vvi-miR172b|\*\_perfect match probe  
vvi-miR172b|\*\_mismatch probe  
vvi-miR172c|\*\_perfect match probe  
vvi-miR172c|\*\_mismatch probe  
vvi-miR172d|\*\_perfect match probe  
vvi-miR172d|\*\_mismatch probe  
vvi-miR319b|\*\_perfect match probe  
vvi-miR319b|\*\_mismatch probe  
vvi-miR319c|\*\_perfect match probe  
vvi-miR319c|\*\_mismatch probe  
vvi-miR319e|\*\_perfect match probe  
vvi-miR319e|\*\_mismatch probe  
vvi-miR319f|\*\_perfect match probe  
vvi-miR319f|\*\_mismatch probe  
vvi-miR319g|\*\_perfect match probe  
vvi-miR319g|\*\_mismatch probe  
vvi-miR390|\*\_perfect match probe  
vvi-miR390|\*\_mismatch probe  
vvi-miR393a|\*\_perfect match probe  
vvi-miR393a|\*\_mismatch probe  
vvi-miR393b|\*\_perfect match probe  
vvi-miR393b|\*\_mismatch probe  
vvi-miR394a|\*\_perfect match probe  
vvi-miR394a|\*\_mismatch probe  
vvi-miR394b|\*\_perfect match probe  
vvi-miR394b|\*\_mismatch probe  
vvi-miR394c|\*\_perfect match probe  
vvi-miR394c|\*\_mismatch probe  
vvi-miR395a|\*\_perfect match probe  
vvi-miR395a|\*\_mismatch probe  
vvi-miR395b|\*\_perfect match probe  
vvi-miR395b|\*\_mismatch probe  
vvi-miR395c|\*\_perfect match probe  
vvi-miR395c|\*\_mismatch probe

vvi|miR-854|nat|as|  
vvi|miR-854|2mut|as|  
vvi|miR-855|nat|as|  
vvi|miR-855|2mut|as|  
vvi|miR-856|nat|as|  
vvi|miR-856|2mut|as|  
vvi|miR-857|nat|as|  
vvi|miR-857|2mut|as|  
vvi|miR-858|nat|as|  
vvi|miR-858|2mut|as|  
vvi|miR-859|nat|as|  
vvi|miR-859|2mut|as|  
vvi|miR-860|nat|as|  
vvi|miR-860|2mut|as|  
vvi|miR-861|nat|as|  
vvi|miR-861|2mut|as|  
vvi|miR-862|nat|as|  
vvi|miR-862|2mut|as|  
vvi|miR-863|nat|as|  
vvi|miR-863|2mut|as|  
vvi|miR-864|nat|as|  
vvi|miR-864|2mut|as|  
vvi|miR-865|nat|as|  
vvi|miR-865|2mut|as|  
vvi|miR-866|nat|as|  
vvi|miR-866|2mut|as|  
vvi|miR-867|nat|as|  
vvi|miR-867|2mut|as|  
vvi|miR-868|nat|as|  
vvi|miR-868|2mut|as|  
vvi|miR-869|nat|as|  
vvi|miR-869|2mut|as|  
vvi|miR-870|nat|as|  
vvi|miR-870|2mut|as|

tgaagtggtcaggggaactc  
tgaagtcgtcaggtgaactc  
tgaagtggcgaaggggaactc  
tgaagtcgtcaagtgaactc  
ctggaggggttgggggaactc  
ctggaggtgttgggtgaactc  
ccacagcttctgaact  
ccacagtttcttaaact  
ttccacagcttctgaactt  
ttccacagtttcttaaactt  
ttccacaacttctgagctg  
ttcccaacttctgagctg  
tcccacagcttattgaaccg  
tcccacagtttattaaaccg  
tgattgagtcgagcgccaatg  
tgattgagtgagccccaatg  
tgattgagtcgagcgccaatg  
tgattgagtgagccccaatg

vvi-miR395d|\*\_perfect match probe  
vvi-miR395d|\*\_mismatch probe  
vvi-miR395e|\*\_perfect match probe  
vvi-miR395e|\*\_mismatch probe  
vvi-miR395f|\*\_perfect match probe  
vvi-miR395f|\*\_mismatch probe  
vvi-miR395g|\*\_perfect match probe  
vvi-miR395g|\*\_mismatch probe  
vvi-miR395h|\*\_perfect match probe  
vvi-miR395h|\*\_mismatch probe  
vvi-miR395i|\*\_perfect match probe  
vvi-miR395i|\*\_mismatch probe  
vvi-miR395j|\*\_perfect match probe  
vvi-miR395j|\*\_mismatch probe  
vvi-miR395k|\*\_perfect match probe  
vvi-miR395k|\*\_mismatch probe  
vvi-miR395l|\*\_perfect match probe  
vvi-miR395l|\*\_mismatch probe  
vvi-miR395m|\*\_perfect match probe  
vvi-miR395m|\*\_mismatch probe  
vvi-miR395n|\*\_perfect match probe  
vvi-miR395n|\*\_mismatch probe  
vvi-miR396a|\*\_perfect match probe  
vvi-miR396a|\*\_mismatch probe  
vvi-miR396b|\*\_perfect match probe  
vvi-miR396b|\*\_mismatch probe  
vvi-miR396c|\*\_perfect match probe  
vvi-miR396c|\*\_mismatch probe  
vvi-miR396d|\*\_perfect match probe  
vvi-miR396d|\*\_mismatch probe  
vvi-miR397a|\*\_perfect match probe  
vvi-miR397a|\*\_mismatch probe  
vvi-miR397b|\*\_perfect match probe  
vvi-miR397b|\*\_mismatch probe

vvi|miR-871|nat|as|  
vvi|miR-871|2mut|as|  
vvi|miR-872|nat|as|  
vvi|miR-872|2mut|as|  
vvi|miR-873|nat|as|  
vvi|miR-873|2mut|as|  
vvi|miR-874|nat|as|  
vvi|miR-874|2mut|as|  
vvi|miR-875|nat|as|  
vvi|miR-875|2mut|as|  
vvi|miR-876|nat|as|  
vvi|miR-876|2mut|as|  
vvi|miR-877|nat|as|  
vvi|miR-877|2mut|as|  
vvi|miR-878|nat|as|  
vvi|miR-878|2mut|as|  
vvi|miR-879|nat|as|  
vvi|miR-879|2mut|as|  
vvi|miR-880|nat|as|  
vvi|miR-880|2mut|as|  
vvi|miR-881|nat|as|  
vvi|miR-881|2mut|as|  
vvi|miR-882|nat|as|  
vvi|miR-882|2mut|as|  
vvi|miR-883|nat|as|  
vvi|miR-883|2mut|as|  
vvi|miR-884|nat|as|  
vvi|miR-884|2mut|as|  
vvi|miR-885|nat|as|  
vvi|miR-885|2mut|as|  
vvi|miR-886|nat|as|  
vvi|miR-886|2mut|as|  
vvi|miR-887|nat|as|  
vvi|miR-887|2mut|as|

gtgttctcaggtgccactcct  
gtgttctcagctgcactcct  
tgtgattctcaggtcacactg  
tgtgattctccgctcacactg  
tgtgattctcaggtcactcctg  
tgtgattctccgctcactcctg  
tgccaaaggagaatcacactg  
tgccaaagaagaatccactg  
tgccaaagaagaggtgccta  
tgccaaagaacaggtgccta  
taccaagtgaagaggccctg  
taccaagcgaagaggctctg  
tgccaaaagaatctgctc  
tgccaaaacaaatccgctc  
tgccaaaagataattgccc  
tgccaaaacataattgccc  
tgccaaagcagattggcctctaag  
tgccaaagaagattggtcctctaag  
tgccaatggagtattgccc  
tgccaatcgactattgccc  
tgccaaaggaggattgactg  
tgccaaagaaggattgaactg  
gccagaaggagagaagcccta  
gccagaagaagagaagtcccta  
tttgattcacgcacaaact  
tttgattcaaccacaaact  
ttggattcgcgcacaaactcg  
ttggattcgcacacaaactcg  
tttgattcacgcacaaactg  
tttgattcacacaaactg  
gattcgcgcacaaactcg  
gattcgcacacaaactcg  
tttgattcacgcacaaactg  
tttgattcacacaaactg

vvi-miR398a|\*\_perfect match probe  
vvi-miR398a|\*\_mismatch probe  
vvi-miR398b|\*\_perfect match probe  
vvi-miR398b|\*\_mismatch probe  
vvi-miR398c|\*\_perfect match probe  
vvi-miR398c|\*\_mismatch probe  
vvi-miR399a|\*\_perfect match probe  
vvi-miR399a|\*\_mismatch probe  
vvi-miR399b|\*\_perfect match probe  
vvi-miR399b|\*\_mismatch probe  
vvi-miR399c|\*\_perfect match probe  
vvi-miR399c|\*\_mismatch probe  
vvi-miR399d|\*\_perfect match probe  
vvi-miR399d|\*\_mismatch probe  
vvi-miR399e|\*\_perfect match probe  
vvi-miR399e|\*\_mismatch probe  
vvi-miR399f|\*\_perfect match probe  
vvi-miR399f|\*\_mismatch probe  
vvi-miR399g|\*\_perfect match probe  
vvi-miR399g|\*\_mismatch probe  
vvi-miR399h|\*\_perfect match probe  
vvi-miR399h|\*\_mismatch probe  
vvi-miR399i|\*\_perfect match probe  
vvi-miR399i|\*\_mismatch probe  
vvi-miR403a|\*\_perfect match probe  
vvi-miR403a|\*\_mismatch probe  
vvi-miR403b|\*\_perfect match probe  
vvi-miR403b|\*\_mismatch probe  
vvi-miR403c|\*\_perfect match probe  
vvi-miR403c|\*\_mismatch probe  
vvi-miR403d|\*\_perfect match probe  
vvi-miR403d|\*\_mismatch probe  
vvi-miR403e|\*\_perfect match probe  
vvi-miR403e|\*\_mismatch probe

vvi|miR-888|nat|as|  
vvi|miR-888|2mut|as|  
vvi|miR-889|nat|as|  
vvi|miR-889|2mut|as|  
vvi|miR-890|nat|as|  
vvi|miR-890|2mut|as|  
vvi|miR-891|nat|as|  
vvi|miR-891|2mut|as|  
vvi|miR-892|nat|as|  
vvi|miR-892|2mut|as|  
vvi|miR-893|nat|as|  
vvi|miR-893|2mut|as|  
vvi|miR-894|nat|as|  
vvi|miR-894|2mut|as|  
vvi|miR-895|nat|as|  
vvi|miR-895|2mut|as|  
vvi|miR-896|nat|as|  
vvi|miR-896|2mut|as|  
vvi|miR-897|nat|as|  
vvi|miR-897|2mut|as|  
vvi|miR-898|nat|as|  
vvi|miR-898|2mut|as|  
vvi|miR-899|nat|as|  
vvi|miR-899|2mut|as|  
vvi|miR-900|nat|as|  
vvi|miR-900|2mut|as|  
vvi|miR-901|nat|as|  
vvi|miR-901|2mut|as|  
vvi|miR-902|nat|as|  
vvi|miR-902|2mut|as|  
vvi|miR-903|nat|as|  
vvi|miR-903|2mut|as|  
vvi|miR-904|nat|as|  
vvi|miR-904|2mut|as|

ttagagtcacgcacaaaact  
ttagagtcaaccacaaaact  
atgcactacctctccccg  
atgcactatctctccccg  
aggccccactgtcttccaa  
aggtcctcactctcttccaa  
gtgatattggttcggctcgtc  
gtgatattcgttcgctcgtc  
cctactctcaattcc  
cctattctcaattcc  
tgacagcgagagagagcagcc  
tgacagagagagagagaacgcc  
tgacagcgagagagagcagcc  
tgacagagagagagagaacgcc  
tgacagcgagagagagcagcc  
tgacagagagagagagaacgcc  
tgacagcgacagagagcagcc  
tgacagagacagagagaacgcc  
tgacagcgacagagagcagcc  
tgacagagacagagagaacgcc  
cttctcaaatgagcatctca  
cttctcaaatgagaatctca  
ttgcaggaaatgactatcca  
ttgcagaaaatgcctatcca  
taactcatgaaggaactaat  
taactcataaagaaactaat  
aactcatgaaggaactaat  
aactcataaagaaactaat  
aaactcagacaaccaaaca  
aaactcagaaaacaaaaca  
tggccctagggataattaatg  
tggccctagtgtctaattaatg  
tggccctagggataattaatg  
tggccctagtgtctaattaatg

vvi-miR403f|\*\_perfect match probe  
vvi-miR403f|\*\_mismatch probe  
vvi-miR408|\*\_perfect match probe  
vvi-miR408|\*\_mismatch probe  
vvi-miR477a|\*\_perfect match probe  
vvi-miR477a|\*\_mismatch probe  
vvi-miR479|\*\_perfect match probe  
vvi-miR479|\*\_mismatch probe  
vvi-miR482a|\*\_perfect match probe  
vvi-miR482a|\*\_mismatch probe  
vvi-miR535a|\*\_perfect match probe  
vvi-miR535a|\*\_mismatch probe  
vvi-miR535b|\*\_perfect match probe  
vvi-miR535b|\*\_mismatch probe  
vvi-miR535c|\*\_perfect match probe  
vvi-miR535c|\*\_mismatch probe  
vvi-miR535d|\*\_perfect match probe  
vvi-miR535d|\*\_mismatch probe  
vvi-miR535e|\*\_perfect match probe  
vvi-miR535e|\*\_mismatch probe  
vvi-miR828a|\*\_perfect match probe  
vvi-miR828a|\*\_mismatch probe  
vvi-miR828b|\*\_perfect match probe  
vvi-miR828b|\*\_mismatch probe  
vvi-miR845a|\*\_perfect match probe  
vvi-miR845a|\*\_mismatch probe  
vvi-miR845b|\*\_perfect match probe  
vvi-miR845b|\*\_mismatch probe  
vvi-miR845c|\*\_perfect match probe  
vvi-miR845c|\*\_mismatch probe  
vvi-miR845d|\*\_perfect match probe  
vvi-miR845d|\*\_mismatch probe  
vvi-miR845e|\*\_perfect match probe  
vvi-miR845e|\*\_mismatch probe

|                     |                       |                                     |
|---------------------|-----------------------|-------------------------------------|
| vvi miR-905 nat as  | aagaagagagagcacactcc  | vvi-miR156a *-5_perfect match probe |
| vvi miR-905 2mut as | aagaagagcgagaacactcc  | vvi-miR156a *-5_mismatch probe      |
| vvi miR-906 nat as  | gatgatgacagaagaagaga  | vvi-miR156a *+5_perfect match probe |
| vvi miR-906 2mut as | gatgatgaaagaacaagaga  | vvi-miR156a *+5_mismatch probe      |
| vvi miR-907 nat as  | aagagaaatgagcacgcaaa  | vvi-miR156b *-5_perfect match probe |
| vvi miR-907 2mut as | aagagaaataagcacccaaa  | vvi-miR156b *-5_mismatch probe      |
| vvi miR-908 nat as  | gaagctgacagaaagagaaa  | vvi-miR156b *+5_perfect match probe |
| vvi miR-908 2mut as | gaagttgacagaaagcggaaa | vvi-miR156b *+5_mismatch probe      |
| vvi miR-909 nat as  | atagagagtgagcacgcaga  | vvi-miR156c *-5_perfect match probe |
| vvi miR-909 2mut as | atagagagcgagcacccaga  | vvi-miR156c *-5_mismatch probe      |
| vvi miR-910 nat as  | acagatgacagatagagagt  | vvi-miR156c *+5_perfect match probe |
| vvi miR-910 2mut as | acagatgaaagatagcgagt  | vvi-miR156c *+5_mismatch probe      |
| vvi miR-911 nat as  | aagagaggtgagcacgcacc  | vvi-miR156d *-5_perfect match probe |
| vvi miR-911 2mut as | aagagagctgagcacccacc  | vvi-miR156d *-5_mismatch probe      |
| vvi miR-912 nat as  | gaagctgacagaaagagagg  | vvi-miR156d *+5_perfect match probe |
| vvi miR-912 2mut as | gaagttgacagaaagcgagg  | vvi-miR156d *+5_mismatch probe      |
| vvi miR-913 nat as  | atagggagtaagcacacaga  | vvi-miR156e *-5_perfect match probe |
| vvi miR-913 2mut as | atagtgagtaagaacacaga  | vvi-miR156e *-5_mismatch probe      |
| vvi miR-914 nat as  | aggggtgacagatagggagt  | vvi-miR156e *+5_perfect match probe |
| vvi miR-914 2mut as | agggctgacagatagtgagt  | vvi-miR156e *+5_mismatch probe      |
| vvi miR-915 nat as  | gagaagagagaggacaagac  | vvi-miR156f *-5_perfect match probe |
| vvi miR-915 2mut as | gagaagagcgagaacaagac  | vvi-miR156f *-5_mismatch probe      |
| vvi miR-916 nat as  | ttctgttgacaggagaagag  | vvi-miR156f *+5_perfect match probe |

|                     |                      |                                     |
|---------------------|----------------------|-------------------------------------|
| vvi miR-916 nat as  | ttctgttgaaagaagaagag | vvi-miR156f *+5_mismatch probe      |
| vvi miR-917 nat as  | aagtctagagagcacaagg  | vvi-miR156g *-5_perfect match       |
| vvi miR-917 2mut as | aagtctagcgagaacaagg  | probe                               |
| vvi miR-918 nat as  | ggtgatgacagaagtctaga | vvi-miR156g *-5_mismatch probe      |
| vvi miR-918 2mut as | ggtgatgaaagaagcctaga | vvi-miR156g *+5_perfect match       |
| vvi miR-919 nat as  | aggcgcagaaagaactcagc | probe                               |
| vvi miR-919 2mut as | aggcccagaaagaattcagc | vvi-miR156g *+5_mismatch probe      |
| vvi miR-920 nat as  | cacaatgaaaggcgcagaaa | vvi-miR156h *-5_perfect match       |
| vvi miR-920 2mut as | cacaataaaaggcccagaaa | probe                               |
| vvi miR-921 nat as  | aagaatagagagcacaagg  | vvi-miR156h *-5_mismatch probe      |
| vvi miR-921 2mut as | aagaatagcgagaacaagg  | vvi-miR156h *+5_perfect match       |
| vvi miR-922 nat as  | ggtgatgacagaagaataga | probe                               |
| vvi miR-922 2mut as | ggtgatgaaagaacaataga | vvi-miR156i *+5_mismatch probe      |
| vvi miR-923 nat as  | cgtaaaggagctccataaa  | vvi-miR156i *-5_perfect match probe |
| vvi miR-923 2mut as | cgtaaaggacctctcataaa | vvi-miR156i *-5_mismatch probe      |
| vvi miR-924 nat as  | cagaactggagcgtaaagga | vvi-miR156i *+5_perfect match       |
| vvi miR-924 2mut as | cagaactcgagagtaaagga | probe                               |
| vvi miR-925 nat as  | gtaaagaagctcccacaagc | vvi-miR159a *-5_mismatch probe      |
| vvi miR-925 2mut as | gtaaagaagttctcacaagc | vvi-miR159a *+5_perfect match       |
| vvi miR-926 nat as  | cagttctggagtgtaaagaa | probe                               |
| vvi miR-926 2mut as | cagttctcgagcgtaaagaa | vvi-miR159a *+5_mismatch probe      |
| vvi miR-927 nat as  | cttcaaggagctccactcca | vvi-miR159b *-5_perfect match       |
| vvi miR-927 2mut as | cttcaaggacttccactcca | probe                               |
| vvi miR-928 nat as  | ctctattggacttcaaggag | vvi-miR159b *-5_mismatch probe      |
|                     |                      | vvi-miR159b *+5_perfect match       |
|                     |                      | probe                               |
|                     |                      | vvi-miR159c *-5_mismatch probe      |
|                     |                      | vvi-miR159c *+5_perfect match       |

|                     |                       |                                     |
|---------------------|-----------------------|-------------------------------------|
| vvi miR-928 nat as  | ctctattcgacttaaaggag  | probe                               |
| vvi miR-928 2mut as |                       | vvi-miR159c *+5_mismatch probe      |
| vvi miR-929 nat as  | actcctctgatgccaaactag | vvi-miR160a *-5_perfect match       |
| vvi miR-929 2mut as | actcttctgatgtcaactag  | probe                               |
| vvi miR-930 nat as  | gggcctgcatgactcctctg  | vvi-miR160a *-5_mismatch probe      |
| vvi miR-930 2mut as | gggcctgaatgacttctctg  | vvi-miR160a *+5_perfect match       |
| vvi miR-931 nat as  | actcccctcatgccaataag  | probe                               |
| vvi miR-931 2mut as | actcctctcatgtcaaatag  | vvi-miR160a *+5_mismatch probe      |
| vvi miR-932 nat as  | tcgcctgcttgactcccctc  | vvi-miR160b *-5_perfect match       |
| vvi miR-932 2mut as | tcgcctccttgactctcctc  | probe                               |
| vvi miR-933 nat as  | gctcctcgcacgccacccgc  | vvi-miR160b *-5_mismatch probe      |
| vvi miR-933 2mut as | gctcctcccacccacccgc   | vvi-miR160b *+5_perfect match       |
| vvi miR-934 nat as  | gggtatgcttgctcctcgc   | probe                               |
| vvi miR-934 2mut as | gggtatccttgctcctcgc   | vvi-miR160b *+5_mismatch probe      |
| vvi miR-935 nat as  | gctcctcgcacgccatccgc  | vvi-miR160c *-5_perfect match       |
| vvi miR-935 2mut as | gctcctcccacccatccgc   | probe                               |
| vvi miR-936 nat as  | atgcatgcatggctcctcgc  | vvi-miR160c *-5_mismatch probe      |
| vvi miR-936 2mut as | atgcatgaatgctcctcgc   | vvi-miR160c *+5_perfect match       |
| vvi miR-937 nat as  | actcccctcatgccaataag  | probe                               |
| vvi miR-937 2mut as | actcctctcatgtcaaatag  | vvi-miR160d *-5_mismatch probe      |
| vvi miR-938 nat as  | tcgcctgcttgactcccctc  | vvi-miR160d *+5_perfect match       |
| vvi miR-938 2mut as | tcgcctccttgactctcctc  | probe                               |
| vvi miR-939 nat as  | gctcctcatacgcacccac   | vvi-miR160d *+5_mismatch probe      |
| vvi miR-939 2mut as | gctcttcatacccacccac   | vvi-miR160e *-5_perfect match       |
|                     |                       | probe                               |
|                     |                       | vvi-miR160e *+5_mismatch probe      |
|                     |                       | vvi-miR160f *-5_perfect match probe |
|                     |                       | vvi-miR160f *-5_mismatch probe      |

|                     |                      |                  |                     |
|---------------------|----------------------|------------------|---------------------|
| vvi miR-940 nat as  | gcatatgcatggctcctcat | vvi-miR160f *+5_ | perfect match       |
| vvi miR-940 2mut as | gcatatgaatgcctcctcat | probe            |                     |
| vvi miR-941 nat as  | aaccgctgcatccagtgact | vvi-miR160f *+5_ | mismatch probe      |
| vvi miR-941 2mut as | aaccctgcatcaagtgact  | vvi-miR162 *-5_  | perfect match probe |
| vvi miR-942 nat as  | agagatcgatgaaccgctgc | vvi-miR162 *-5_  | mismatch probe      |
| vvi miR-942 2mut as | agagatagatgaaccctgc  | vvi-miR162 *+5_  | perfect match probe |
|                     |                      | vvi-miR162 *+5_  | mismatch probe      |
| vvi miR-943 nat as  | aaggggagcacgtgcaagcc | vvi-miR164a *-5_ | perfect match       |
| vvi miR-943 2mut as | aaggtgagcacgtgaaagcc | probe            |                     |
|                     |                      | vvi-miR164a *-5_ | mismatch probe      |
| vvi miR-944 nat as  | catgttgagaaggggagca  | vvi-miR164a *+5_ | perfect match       |
| vvi miR-944 2mut as | catgttcgagaaggtgagca | probe            |                     |
|                     |                      | vvi-miR164a *+5_ | mismatch probe      |
| vvi miR-945 nat as  | gagccagggcacatgtaaaa | vvi-miR164b *-5_ | perfect match       |
| vvi miR-945 2mut as | gagccaggccccatgtaaaa | probe            |                     |
|                     |                      | vvi-miR164b *-5_ | mismatch probe      |
| vvi miR-946 nat as  | aagtgggagagccagggcac | vvi-miR164b *+5_ | perfect match       |
| vvi miR-946 2mut as | aagtgtgagagtcagggcac | probe            |                     |
|                     |                      | vvi-miR164b *+5_ | mismatch probe      |
| vvi miR-947 nat as  | aggggagcacgtgcagagca | vvi-miR164d *-5_ | perfect match       |
| vvi miR-947 2mut as | aggggagaacgtgaagagca | probe            |                     |
|                     |                      | vvi-miR164d *-5_ | mismatch probe      |
| vvi miR-948 nat as  | catgttgagaaggggagca  | vvi-miR164d *+5_ | perfect match       |
| vvi miR-948 2mut as | catgttcgagaaggtgagca | probe            |                     |
|                     |                      | vvi-miR164d *+5_ | mismatch probe      |
| vvi miR-949 nat as  | cagacaacattcccctcaaa | vvi-miR166c *-5_ | perfect match       |
| vvi miR-949 2mut as | cagacaaaattcctctcaaa | probe            |                     |
|                     |                      | vvi-miR166c *-5_ | mismatch probe      |
| vvi miR-950 nat as  | tgtcctcgagccagacaaca | vvi-miR166c *+5_ | perfect match       |
| vvi miR-950 2mut as | tgtcctcgactcagacaaca | probe            |                     |
|                     |                      | vvi-miR166c *+5_ | mismatch probe      |
| vvi miR-951 nat as  | agacaacaatcccctcaaag | vvi-miR166d *-5_ | perfect match       |
| vvi miR-951 2mut as | agacaaaaatcctctcaaag | probe            |                     |
|                     |                      | vvi-miR166d *-5_ | mismatch probe      |

|                     |                       |                                |
|---------------------|-----------------------|--------------------------------|
| vvi miR-952 nat as  | tggcctcgagccagacaaca  | vvi-miR166d *+5_perfect match  |
| vvi miR-952 2mut as | tggcctcgactcagacaaca  | probe                          |
|                     |                       | vvi-miR166d *+5_mismatch probe |
| vvi miR-953 nat as  | cagacaacattcccctcaaa  | vvi-miR166e *-5_perfect match  |
| vvi miR-953 2mut as | cagacaaaattcctcctcaaa | probe                          |
|                     |                       | vvi-miR166e *-5_mismatch probe |
| vvi miR-954 nat as  | tgtcctcgagccagacaaca  | vvi-miR166e *+5_perfect match  |
| vvi miR-954 2mut as | tgtcctcgactcagacaaca  | probe                          |
| vvi miR-955 nat as  | cagccaacattccccacaac  | vvi-miR166e *+5_mismatch probe |
| vvi miR-955 2mut as | cagcaaacattcctcacaac  | vvi-miR166f *-5_perfect match  |
|                     |                       | probe                          |
| vvi miR-956 nat as  | aagcctcgagccagccaaca  | vvi-miR166f *-5_mismatch probe |
| vvi miR-956 2mut as | aagcctcgaccagtcaaca   | vvi-miR166g *-5_perfect match  |
|                     |                       | probe                          |
| vvi miR-957 nat as  | agacaacattcccctcaact  | vvi-miR166g *-5_mismatch probe |
| vvi miR-957 2mut as | agacaaaattcctcctcaact | vvi-miR166g *+5_perfect match  |
|                     |                       | probe                          |
| vvi miR-958 nat as  | ggatctcgaaccagacaaca  | vvi-miR166g *+5_mismatch probe |
| vvi miR-958 2mut as | ggatctagaacaagacaaca  | vvi-miR166h *-5_perfect match  |
|                     |                       | probe                          |
| vvi miR-959 nat as  | cagacagcgttcccctcaac  | vvi-miR166h *-5_mismatch probe |
| vvi miR-959 2mut as | cagacagagttcctcctcaac | vvi-miR166h *+5_perfect match  |
|                     |                       | probe                          |
| vvi miR-960 nat as  | tggctcgaaccagacagcg   | vvi-miR166h *+5_mismatch probe |
| vvi miR-960 2mut as | tggcttagaacaagacagcg  | vvi-miR166a *-5_perfect match  |
|                     |                       | probe                          |
| vvi miR-961 nat as  | caaacctcattcaaacacc   | vvi-miR166a *-5_mismatch probe |
| vvi miR-961 2mut as | caaatctcattcaaacacc   | vvi-miR166a *+5_perfect match  |
|                     |                       | probe                          |
| vvi miR-962 nat as  | ggatcttggatcaaacctca  | vvi-miR166a *+5_mismatch probe |
| vvi miR-962 2mut as | ggatcttcgatcaaatctca  | vvi-miR166b *-5_perfect match  |
|                     |                       | probe                          |
| vvi miR-963 nat as  | cagccaacattcccctcaaa  |                                |

|                     |                       |                                |
|---------------------|-----------------------|--------------------------------|
| vvi miR-963 nat as  | cagcaaaccattcctctcaaa | vvi-miR166b *-5_mismatch probe |
| vvi miR-964 nat as  | atgcctcgagccagccaaca  | vvi-miR166b *+5_perfect match  |
| vvi miR-964 2mut as | atgcctcgagccagtcaca   | probe                          |
| vvi miR-965 nat as  | ctgcaagatgacctgatcat  | vvi-miR166b *+5_mismatch probe |
| vvi miR-965 2mut as | ctgcaagataatctgatcat  | vvi-miR167a *-5_perfect match  |
| vvi miR-966 nat as  | gtgattgaagctgcaagatg  | probe                          |
| vvi miR-966 2mut as | gtgattgaacctgaaagatg  | vvi-miR167a *-5_mismatch probe |
| vvi miR-967 nat as  | ctgccacatgatctagtctt  | vvi-miR167a *+5_perfect match  |
| vvi miR-967 2mut as | ctgcaacatgatctactctt  | probe                          |
| vvi miR-968 nat as  | acaggtgaaactgccacatg  | vvi-miR167b *-5_mismatch probe |
| vvi miR-968 2mut as | acagctgaaactgtcacatg  | vvi-miR167b *+5_perfect match  |
| vvi miR-969 nat as  | gctaccacatgatctgatct  | probe                          |
| vvi miR-969 2mut as | gctacaacatgatccgatct  | vvi-miR167b *+5_mismatch probe |
| vvi miR-970 nat as  | acaggtgaggtaccacatg   | vvi-miR167c *-5_perfect match  |
| vvi miR-970 2mut as | acaggtgagcttaccacatg  | probe                          |
| vvi miR-971 nat as  | tcagggcatgacctagctag  | vvi-miR167c *-5_mismatch probe |
| vvi miR-971 2mut as | tcaggccatgacctacctag  | vvi-miR167c *+5_perfect match  |
| vvi miR-972 nat as  | aggagtgaggctgtcagggc  | probe                          |
| vvi miR-972 2mut as | aggagtgagctgtcagggc   | vvi-miR167c *+5_mismatch probe |
| vvi miR-973 nat as  | actgccacatgatctgatct  | vvi-miR167e *-5_perfect match  |
| vvi miR-973 2mut as | actgtcacatgatccgatct  | probe                          |
| vvi miR-974 nat as  | acaggtgaaactgccacatg  | vvi-miR167e *-5_mismatch probe |
| vvi miR-974 2mut as | acagctgaaactgtcacatg  | vvi-miR167e *+5_perfect match  |
|                     |                       | probe                          |
|                     |                       | vvi-miR167e *+5_mismatch probe |

|                     |                       |                                     |
|---------------------|-----------------------|-------------------------------------|
| vvi miR-975 nat as  | tgatgcaaggcgggatcgga  | vvi-miR168 *-5_perfect match probe  |
| vvi miR-975 2mut as | tgatgcaagcaggggatcgga | vvi-miR168 *-5_mismatch probe       |
| vvi miR-976 nat as  | ccgattcagttgatgcaagg  | vvi-miR168 *+5_perfect match probe  |
| vvi miR-976 2mut as | ccgattccgttgatgaaagg  | vvi-miR168 *+5_mismatch probe       |
| vvi miR-977 nat as  | aggacaactgccagggttc   | vvi-miR169a *-5_perfect match probe |
| vvi miR-977 2mut as | aggaaaactgtcagggttc   | vvi-miR169a *-5_mismatch probe      |
| vvi miR-978 nat as  | aatgtagccaaggacaact   | vvi-miR169a *+5_perfect match probe |
| vvi miR-978 2mut as | aatgtagtcaagaacaact   | vvi-miR169a *+5_mismatch probe      |
| vvi miR-979 nat as  | ccaaggagacttgccataaa  | vvi-miR169y *-5_perfect match probe |
| vvi miR-979 2mut as | ccaagaagacttgccataaa  | vvi-miR169y *-5_mismatch probe      |
| vvi miR-980 nat as  | tcaggtgccaggagacttg   | vvi-miR169y *+5_perfect match probe |
| vvi miR-980 2mut as | tcaggtgtcaagaagacttg  | vvi-miR169y *+5_mismatch probe      |
| vvi miR-981 nat as  | aaggatgactaaccgtgcac  | vvi-miR169b *-5_perfect match probe |
| vvi miR-981 2mut as | aaggatgcctaacagtgcac  | vvi-miR169b *-5_mismatch probe      |
| vvi miR-982 nat as  | caaatgagccaaggatgact  | vvi-miR169b *+5_perfect match probe |
| vvi miR-982 2mut as | caaatgagtcaagaatgact  | vvi-miR169b *+5_mismatch probe      |
| vvi miR-983 nat as  | aggacaactgccggattaa   | vvi-miR169c *-5_perfect match probe |
| vvi miR-983 2mut as | aggaaaactgtcggattaa   | vvi-miR169c *-5_mismatch probe      |
| vvi miR-984 nat as  | aatgtagccaaggacaact   | vvi-miR169c *+5_perfect match probe |
| vvi miR-984 2mut as | aatgtagtcaagaacaact   | vvi-miR169c *+5_mismatch probe      |
| vvi miR-985 nat as  | aggacaactgccagggttc   | vvi-miR169d *-5_perfect match probe |
| vvi miR-985 2mut as | aggaaaactgtcagggttc   | vvi-miR169d *-5_mismatch probe      |
| vvi miR-986 nat as  | aatgtagccaaggacaact   | vvi-miR169d *+5_perfect match probe |
| vvi miR-986 2mut as | aatgtagtcaagaacaact   | vvi-miR169d *+5_mismatch probe      |

|                     |                      |                                     |
|---------------------|----------------------|-------------------------------------|
| vvi miR-987 nat as  | caaggtgactgcctggaacc | vvi-miR169e *-5_perfect match       |
| vvi miR-987 2mut as | caagctgactgtctggaacc | probe                               |
|                     |                      | vvi-miR169e *-5_mismatch probe      |
|                     |                      | vvi-miR169e *+5_perfect match       |
|                     |                      | probe                               |
| vvi miR-988 nat as  | taaaattagccaaggtgact | vvi-miR169e *+5_mismatch probe      |
| vvi miR-988 2mut as | taaaattagtaaaggtgact | vvi-miR169f *-5_perfect match probe |
| vvi miR-989 nat as  | caaacacaactgcccatta  | vvi-miR169f *-5_mismatch probe      |
| vvi miR-989 2mut as | caaacccaactgtccatta  | vvi-miR169f *+5_perfect match       |
|                     |                      | probe                               |
| vvi miR-990 nat as  | catgtagccaaacacaact  | vvi-miR169f *+5_mismatch probe      |
| vvi miR-990 2mut as | catgtagtcaaaccaact   | vvi-miR169g *-5_perfect match       |
|                     |                      | probe                               |
| vvi miR-991 nat as  | caaagacaactgcccggctt | vvi-miR169g *-5_mismatch probe      |
| vvi miR-991 2mut as | caaagaaaactgtcggctt  | vvi-miR169g *+5_perfect match       |
|                     |                      | probe                               |
| vvi miR-992 nat as  | catgtagccaaagacaact  | vvi-miR169g *+5_mismatch probe      |
| vvi miR-992 2mut as | catgtagtcaaagaaaact  | vvi-miR169h *-5_perfect match       |
|                     |                      | probe                               |
| vvi miR-993 nat as  | aaggataaccctccgtgcgt | vvi-miR169h *-5_mismatch probe      |
| vvi miR-993 2mut as | aaggataactctcagtgctg | vvi-miR169h *+5_perfect match       |
|                     |                      | probe                               |
| vvi miR-994 nat as  | taaaggagtcaaggataacc | vvi-miR169h *+5_mismatch probe      |
| vvi miR-994 2mut as | taaagaagtcaagaataacc | vvi-miR169i *-5_perfect match probe |
| vvi miR-995 nat as  | gggataaccagccgtgcatg | vvi-miR169i *-5_mismatch probe      |
| vvi miR-995 2mut as | gggataacaagtcgtgcatg | vvi-miR169i *+5_perfect match       |
|                     |                      | probe                               |
| vvi miR-996 nat as  | taaaggagacaggataacc  | vvi-miR169i *+5_mismatch probe      |
| vvi miR-996 2mut as | taaagaagacagtgataacc | vvi-miR169j *-5_perfect match probe |
| vvi miR-997 nat as  | aggacaacctgccagggaca | vvi-miR169j *-5_mismatch probe      |
| vvi miR-997 2mut as | aggacaatctgtcagggaca | vvi-miR169j *+5_perfect match       |
|                     |                      | probe                               |
| vvi miR-998 nat as  | aaggtagccaaggacaacct | vvi-miR169j *+5_mismatch probe      |
| vvi miR-998 2mut as | aaggtagtcaagaacaacct | vvi-miR169k *-5_perfect match       |
| vvi miR-999 nat as  | aggacaacctgccagggaca |                                     |

|                      |                       |                                                                          |
|----------------------|-----------------------|--------------------------------------------------------------------------|
| vvi miR-999 nat as   | aggacaatctgtcagggaca  | probe<br>vvi-miR169k *-5_mismatch probe<br>vvi-miR169k *+5_perfect match |
| vvi miR-1000 nat as  | aaggtagccaaggacaacct  | probe                                                                    |
| vvi miR-1000 2mut as | aaggtagtcagaacaacct   | vvi-miR169k *+5_mismatch probe                                           |
| vvi miR-1001 nat as  | agaataactagccgtgcatg  | vvi-miR169l *-5_perfect match probe                                      |
| vvi miR-1001 2mut as | agaataattagtcgtgcatg  | vvi-miR169l *-5_mismatch probe<br>vvi-miR169l *+5_perfect match          |
| vvi miR-1002 nat as  | caaatgagccaagaataact  | probe                                                                    |
| vvi miR-1002 2mut as | caaatgagtcaacaataact  | vvi-miR169l *+5_mismatch probe<br>vvi-miR169m *-5_perfect match          |
| vvi miR-1003 nat as  | tcggatgcttgccagttatg  | probe                                                                    |
| vvi miR-1003 2mut as | tcggatccttgctcagttatg | vvi-miR169m *-5_mismatch probe<br>vvi-miR169m *+5_perfect match          |
| vvi miR-1004 nat as  | aaacagagcctcggatgctt  | probe                                                                    |
| vvi miR-1004 2mut as | aaacagagtctcagatgctt  | vvi-miR169m *+5_mismatch probe<br>vvi-miR169n *-5_perfect match          |
| vvi miR-1005 nat as  | tgcttgccagttatgaccag  | probe                                                                    |
| vvi miR-1005 2mut as | tgcttgctcagttatgccag  | vvi-miR169n *-5_mismatch probe<br>vvi-miR169n *+5_perfect match          |
| vvi miR-1006 nat as  | aaatagagcctcagatgctt  | probe                                                                    |
| vvi miR-1006 2mut as | aaatagagtctccgatgctt  | vvi-miR169n *+5_mismatch probe<br>vvi-miR169o *-5_perfect match          |
| vvi miR-1007 nat as  | gaataactcgtgtccatgc   | probe                                                                    |
| vvi miR-1007 2mut as | gaataactccttgccatgc   | vvi-miR169o *-5_mismatch probe<br>vvi-miR169o *+5_perfect match          |
| vvi miR-1008 nat as  | cgcattgagccaagaataact | probe                                                                    |
| vvi miR-1008 2mut as | cgcattgagtcaacaataact | vvi-miR169o *+5_mismatch probe<br>vvi-miR169p *-5_perfect match          |
| vvi miR-1009 nat as  | tcggatgcttgccagttata  | probe                                                                    |
| vvi miR-1009 2mut as | tcggatccttgctcagttata | vvi-miR169p *-5_mismatch probe<br>vvi-miR169p *+5_perfect match          |
| vvi miR-1010 nat as  | aaacagagcctcggatgctt  | probe                                                                    |
| vvi miR-1010 2mut as | aaacagagtctcagatgctt  | vvi-miR169p *+5_mismatch probe                                           |

|                      |                       |                                     |
|----------------------|-----------------------|-------------------------------------|
| vvi miR-1011 nat as  | aggattacatgccggctgtt  | vvi-miR169q *-5_perfect match       |
| vvi miR-1011 2mut as | aggattaaatgccgctgtt   | probe                               |
|                      |                       | vvi-miR169q *-5_mismatch probe      |
|                      |                       | vvi-miR169q *+5_perfect match       |
|                      |                       | probe                               |
| vvi miR-1012 nat as  | aaatagagccaggattacat  | vvi-miR169q *+5_mismatch probe      |
| vvi miR-1012 2mut as | aaatagagtcaagaattacat | vvi-miR169r *-5_perfect match probe |
| vvi miR-1013 nat as  | caagtcaacttgccggttac  | vvi-miR169r *-5_mismatch probe      |
| vvi miR-1013 2mut as | caagccaactgtcggttac   | vvi-miR169r *+5_perfect match       |
|                      |                       | probe                               |
| vvi miR-1014 nat as  | caaactgagtcaagtcaact  | vvi-miR169r *+5_mismatch probe      |
| vvi miR-1014 2mut as | caaactgagccaagccaact  | vvi-miR169s *-5_perfect match probe |
| vvi miR-1015 nat as  | ggaacaacttgccgggaaga  | vvi-miR169s *-5_mismatch probe      |
| vvi miR-1015 2mut as | ggaaaaactgtcgggaaga   | vvi-miR169s *+5_perfect match       |
|                      |                       | probe                               |
| vvi miR-1016 nat as  | aatgtagccaggaacaactt  | vvi-miR169s *+5_mismatch probe      |
| vvi miR-1016 2mut as | aatgtagtcagaaacaactt  | vvi-miR169t *-5_perfect match probe |
| vvi miR-1017 nat as  | caagtcaacttgccggttac  | vvi-miR169t *-5_mismatch probe      |
| vvi miR-1017 2mut as | caagccaactgtcggttac   | vvi-miR169t *+5_perfect match       |
|                      |                       | probe                               |
| vvi miR-1018 nat as  | aaactgagtcaagtcaactt  | vvi-miR169t *+5_mismatch probe      |
| vvi miR-1018 2mut as | aaactgagccaagccaactt  | vvi-miR169u *-5_perfect match       |
|                      |                       | probe                               |
| vvi miR-1019 nat as  | caagtcaacttgccggtaac  | vvi-miR169u *-5_mismatch probe      |
| vvi miR-1019 2mut as | caagccaactgtcggtaac   | vvi-miR169u *+5_perfect match       |
|                      |                       | probe                               |
| vvi miR-1020 nat as  | aaacagagtcaagtcaactt  | vvi-miR169u *+5_mismatch probe      |
| vvi miR-1020 2mut as | aaacagagccaagccaactt  | vvi-miR169v *-5_perfect match       |
|                      |                       | probe                               |
| vvi miR-1021 nat as  | gaaataaattgccgatccat  | vvi-miR169v *-5_mismatch probe      |
| vvi miR-1021 2mut as | gaaataaatcgatccat     | vvi-miR169v *+5_perfect match       |
|                      |                       | probe                               |
| vvi miR-1022 nat as  | aacatagccaagaaataaat  | vvi-miR169v *+5_mismatch probe      |
| vvi miR-1022 2mut as | aacatagtcacaataaat    | vvi-miR169w *-5_perfect match       |
| vvi miR-1023 nat as  | agaatgactcgccgaccacc  |                                     |

|                      |                       |                                                                          |
|----------------------|-----------------------|--------------------------------------------------------------------------|
| vvi miR-1023 nat as  | agaatgactacccgaccacc  | probe<br>vvi-miR169w *-5_mismatch probe<br>vvi-miR169w *+5_perfect match |
| vvi miR-1024 nat as  | aatgtagctaagaatgactc  | probe                                                                    |
| vvi miR-1024 2mut as | aatgtagttaagaataactc  | vvi-miR169w *+5_mismatch probe<br>vvi-miR169x *-5_perfect match          |
| vvi miR-1025 nat as  | aggaatgactgcctaaagac  | probe                                                                    |
| vvi miR-1025 2mut as | aggaatgcctgtctaaagac  | vvi-miR169x *-5_mismatch probe<br>vvi-miR169x *+5_perfect match          |
| vvi miR-1026 nat as  | cagtttagccgaaggaatga  | probe                                                                    |
| vvi miR-1026 2mut as | cagtttagtcaaaggaatga  | vvi-miR169x *+5_mismatch probe<br>vvi-miR171a *-5_perfect match          |
| vvi miR-1027 nat as  | cgtgccaatatcatgttcaa  | probe                                                                    |
| vvi miR-1027 2mut as | cgtgtcaatatcatcttcaa  | vvi-miR171a *-5_mismatch probe<br>vvi-miR171a *+5_perfect match          |
| vvi miR-1028 nat as  | tctgattgagccgtgccaat  | probe                                                                    |
| vvi miR-1028 2mut as | tctgattgaccgtgtccaat  | vvi-miR171a *+5_mismatch probe<br>vvi-miR171b *-5_perfect match          |
| vvi miR-1029 nat as  | aggcacgccaataacctcccc | probe                                                                    |
| vvi miR-1029 2mut as | aggcaccccaatatctcccc  | vvi-miR171b *-5_mismatch probe<br>vvi-miR171b *+5_perfect match          |
| vvi miR-1030 nat as  | ctttaaattgaggcacgcca  | probe                                                                    |
| vvi miR-1030 2mut as | ctttaaattaagccacgcca  | vvi-miR171b *+5_mismatch probe<br>vvi-miR171c *-5_perfect match          |
| vvi miR-1031 nat as  | cgcaccaatatcccgaata   | probe                                                                    |
| vvi miR-1031 2mut as | cgcacaaatatccagtaata  | vvi-miR171c *-5_mismatch probe<br>vvi-miR171c *+5_perfect match          |
| vvi miR-1032 nat as  | tcttattgaaccgaccaat   | probe                                                                    |
| vvi miR-1032 2mut as | tcttattaaacccaccaat   | vvi-miR171c *+5_mismatch probe<br>vvi-miR171d *-5_perfect match          |
| vvi miR-1033 nat as  | cgtatcaatatctcgtgtat  | probe                                                                    |
| vvi miR-1033 2mut as | cgtataaatatctcctgtat  | vvi-miR171d *-5_mismatch probe<br>vvi-miR171d *+5_perfect match          |
| vvi miR-1034 nat as  | tctaattgaaccgtatcaat  | probe                                                                    |

|                      |                      |                                     |
|----------------------|----------------------|-------------------------------------|
| vvi miR-1034 2mut as | tctaattaaacagtatcaat | vvi-miR171d *+5_mismatch probe      |
| vvi miR-1035 nat as  | aacctcaccaacatcgctta | vvi-miR171e *-5_perfect match probe |
| vvi miR-1035 2mut as | aacctcacaacatccctta  | vvi-miR171e *-5_mismatch probe      |
| vvi miR-1036 nat as  | cttcgattgaacctcacca  | vvi-miR171e *+5_perfect match probe |
| vvi miR-1036 2mut as | cttcagattgaatctcacca | vvi-miR171e *+5_mismatch probe      |
| vvi miR-1037 nat as  | ctcaccaacatcgctttctt | vvi-miR171f *-5_perfect match probe |
| vvi miR-1037 2mut as | ctcacaaacatccctttctt | vvi-miR171f *-5_mismatch probe      |
| vvi miR-1038 nat as  | tcagattgaacctcaccaac | vvi-miR171f *+5_perfect match probe |
| vvi miR-1038 2mut as | tcagattaaacctcatcaac | vvi-miR171f *+5_mismatch probe      |
| vvi miR-1039 nat as  | cgatggaaccaacatggaga | vvi-miR171g *-5_perfect match probe |
| vvi miR-1039 2mut as | cgatggaacaaacatcgaga | vvi-miR171g *-5_mismatch probe      |
| vvi miR-1040 nat as  | ccccaccgatggaaccaaca | vvi-miR171g *+5_perfect match probe |
| vvi miR-1040 2mut as | ccccacagatggaacaaaca | vvi-miR171g *+5_mismatch probe      |
| vvi miR-1041 nat as  | aaccgcaccaacatctcgtg | vvi-miR171h *-5_perfect match probe |
| vvi miR-1041 2mut as | aacccacaaaatctcgtg   | vvi-miR171h *-5_mismatch probe      |
| vvi miR-1042 nat as  | agttaggttgaaccgcacca | vvi-miR171h *+5_perfect match probe |
| vvi miR-1042 2mut as | agttagcttgaaccccacca | vvi-miR171h *+5_mismatch probe      |
| vvi miR-1043 nat as  | cattccaacatccccacctt | vvi-miR171i *-5_perfect match probe |
| vvi miR-1043 2mut as | cattcaaacatcctcacctt | vvi-miR171i *-5_mismatch probe      |
| vvi miR-1044 nat as  | tttgattgagccattccaac | vvi-miR171i *+5_perfect match probe |
| vvi miR-1044 2mut as | tttgattgactcattccaac | vvi-miR171i *+5_mismatch probe      |
| vvi miR-1045 nat as  | ttgatgatgctgcatcgcca | vvi-miR172a *-5_perfect match probe |
| vvi miR-1045 2mut as | ttgatgatcctgaatcgcca | vvi-miR172a *-5_mismatch probe      |
| vvi miR-1046 nat as  | gatgagaatcttgatgatgc | vvi-miR172a *+5_perfect match probe |

|                      |                       |                                |
|----------------------|-----------------------|--------------------------------|
| vvi miR-1046 2mut as | gatgcgaatcttgataatgc  | vvi-miR172a *+5_mismatch probe |
| vvi miR-1047 nat as  | cttgatgatgctgcatcggc  | vvi-miR172b *-5_perfect match  |
| vvi miR-1047 2mut as | cttgatgatcctgaatcggc  | probe                          |
| vvi miR-1048 nat as  | gttgagaatcttgatgatgc  | vvi-miR172b *-5_mismatch probe |
| vvi miR-1048 2mut as | gttgcgaaatcttgataatgc | vvi-miR172b *+5_perfect match  |
| vvi miR-1049 nat as  | cttgatgatgctccatccgc  | probe                          |
| vvi miR-1049 2mut as | cttgatgatctccatccgc   | vvi-miR172b *+5_mismatch probe |
| vvi miR-1050 nat as  | cttgatgatgctccatccgc  | vvi-miR172c *-5_perfect match  |
| vvi miR-1050 2mut as | cttgatgatgctccatccgc  | probe                          |
| vvi miR-1051 nat as  | cttgatgatgctccatccgc  | vvi-miR172c *-5_mismatch probe |
| vvi miR-1051 2mut as | cttgatgatgctccatccgc  | vvi-miR172c *+5_perfect match  |
| vvi miR-1052 nat as  | cttgatgatgctccatccgc  | probe                          |
| vvi miR-1052 2mut as | cttgatgatgctccatccgc  | vvi-miR172c *+5_mismatch probe |
| vvi miR-1053 nat as  | cttgatgatgctccatccgc  | vvi-miR172d *-5_perfect match  |
| vvi miR-1053 2mut as | cttgatgatgctccatccgc  | probe                          |
| vvi miR-1054 nat as  | cttgatgatgctccatccgc  | vvi-miR172d *-5_mismatch probe |
| vvi miR-1054 2mut as | cttgatgatgctccatccgc  | vvi-miR172d *+5_perfect match  |
| vvi miR-1055 nat as  | cttgatgatgctccatccgc  | probe                          |
| vvi miR-1055 2mut as | cttgatgatgctccatccgc  | vvi-miR172d *+5_mismatch probe |
| vvi miR-1056 nat as  | cttgatgatgctccatccgc  | vvi-miR172d *+5_perfect match  |
| vvi miR-1056 2mut as | cttgatgatgctccatccgc  | probe                          |
| vvi miR-1057 nat as  | cttgatgatgctccatccgc  | vvi-miR319b *-5_perfect match  |
| vvi miR-1057 2mut as | cttgatgatgctccatccgc  | probe                          |
|                      |                       | vvi-miR319b *-5_mismatch probe |
|                      |                       | vvi-miR319b *+5_perfect match  |
|                      |                       | probe                          |
|                      |                       | vvi-miR319b *+5_mismatch probe |
|                      |                       | vvi-miR319c *-5_perfect match  |
|                      |                       | probe                          |
|                      |                       | vvi-miR319c *-5_mismatch probe |
|                      |                       | vvi-miR319c *+5_perfect match  |
|                      |                       | probe                          |
|                      |                       | vvi-miR319c *+5_mismatch probe |
|                      |                       | vvi-miR319e *-5_perfect match  |
|                      |                       | probe                          |
|                      |                       | vvi-miR319e *-5_mismatch probe |

|                      |                      |                                     |
|----------------------|----------------------|-------------------------------------|
| vvi miR-1058 nat as  | gttgtttgggctgcaaagg  | vvi-miR319e *+5_perfect match probe |
| vvi miR-1058 2mut as | gttgtttgcctgcaaagg   | vvi-miR319e *+5_mismatch probe      |
| vvi miR-1059 nat as  | ctgaaggaagctctcttaaa | vvi-miR319f *-5_perfect match probe |
| vvi miR-1059 2mut as | ctgaaggaacttctcttaaa | vvi-miR319f *-5_mismatch probe      |
| vvi miR-1060 nat as  | atgagtggactgaaggaagc | vvi-miR319f *+5_perfect match probe |
| vvi miR-1060 2mut as | atgagtcgactgaagaaagc | vvi-miR319f *+5_mismatch probe      |
| vvi miR-1061 nat as  | gactaaaaggagctcttcag | vvi-miR319g *-5_perfect match probe |
| vvi miR-1061 2mut as | gactaaaagaagttcttcag | vvi-miR319g *-5_mismatch probe      |
| vvi miR-1062 nat as  | tctttattggactaaaagga | vvi-miR319g *+5_perfect match probe |
| vvi miR-1062 2mut as | tctttattgcctaaaagga  | vvi-miR319g *+5_mismatch probe      |
| vvi miR-1063 nat as  | aggatagatagcgccacaca | vvi-miR390 *-5_perfect match probe  |
| vvi miR-1063 2mut as | aggatacatagccccacaca | vvi-miR390 *-5_mismatch probe       |
| vvi miR-1064 nat as  | ccgtgaaactcaggatagat | vvi-miR390 *+5_perfect match probe  |
| vvi miR-1064 2mut as | ccgtaaaactcagaatagat | vvi-miR390 *+5_mismatch probe       |
| vvi miR-1065 nat as  | gggatagcatgatccaatgg | vvi-miR393a *-5_perfect match probe |
| vvi miR-1065 2mut as | gggatagaatgatcaaatgg | vvi-miR393a *-5_mismatch probe      |
| vvi miR-1066 nat as  | agagttcctaagggatagca | vvi-miR393a *+5_perfect match probe |
| vvi miR-1066 2mut as | agagtttctaagtgatagca | vvi-miR393a *+5_mismatch probe      |
| vvi miR-1067 nat as  | gggatagcatgatccaaaga | vvi-miR393b *-5_perfect match probe |
| vvi miR-1067 2mut as | gggatagaatgatccaaaga | vvi-miR393b *-5_mismatch probe      |
| vvi miR-1068 nat as  | aggaatccaaagggatagca | vvi-miR393b *+5_perfect match probe |
| vvi miR-1068 2mut as | aggaatcaaaagtgatagca | vvi-miR393b *+5_mismatch probe      |
| vvi miR-1069 nat as  | atgctggccacctcaaaaag | vvi-miR394a *-5_perfect match probe |
| vvi miR-1069 2mut as | atgctggtcacctcaaaaag | vvi-miR394a *-5_mismatch probe      |
| vvi miR-1070 nat as  | ccactttggcatgctggcca | vvi-miR394a *+5_perfect match probe |

|                      |                       |                                |
|----------------------|-----------------------|--------------------------------|
| vvi miR-1070 nat as  | ccactttgccatcctggcca  | probe                          |
| vvi miR-1070 2mut as |                       | vvi-miR394a *+5_mismatch probe |
| vvi miR-1071 nat as  | agtatgccacctccacaga   | vvi-miR394b *-5_perfect match  |
| vvi miR-1071 2mut as | agtatgtccacctcaacaga  | probe                          |
| vvi miR-1072 nat as  | cttggttgccagtatgcca   | vvi-miR394b *-5_mismatch probe |
| vvi miR-1072 2mut as | cttggttgccagtatgcca   | vvi-miR394b *+5_perfect match  |
| vvi miR-1073 nat as  | atcctggccgcctccaaacg  | probe                          |
| vvi miR-1073 2mut as | atcctggccctctccaaacg  | vvi-miR394c *-5_mismatch probe |
| vvi miR-1074 nat as  | ccaatttgccatcctggccg  | vvi-miR394c *+5_perfect match  |
| vvi miR-1074 2mut as | ccaatttgccatcctggccg  | probe                          |
| vvi miR-1075 nat as  | tgatcaagggaactctaggg  | vvi-miR394c *+5_mismatch probe |
| vvi miR-1075 2mut as | tgatcaagtgaattctaggg  | vvi-miR395a *-5_perfect match  |
| vvi miR-1076 nat as  | cctagtgaagtgatcaaggg  | probe                          |
| vvi miR-1076 2mut as | cctagcgaagcgaatcaaggg | vvi-miR395a *-5_mismatch probe |
| vvi miR-1077 nat as  | tggttaaggggaactctaggg | vvi-miR395a *+5_perfect match  |
| vvi miR-1077 2mut as | tggttaaggtgaattctaggg | probe                          |
| vvi miR-1078 nat as  | cccagtgaagtggtaagggg  | vvi-miR395b *-5_mismatch probe |
| vvi miR-1078 2mut as | cccagcgaagtcgtaagggg  | vvi-miR395b *+5_perfect match  |
| vvi miR-1079 nat as  | tggtcaagggaactctaggg  | probe                          |
| vvi miR-1079 2mut as | tggtcaagtgaattctaggg  | vvi-miR395b *+5_mismatch probe |
| vvi miR-1080 nat as  | cccagtgaagtggtaagggg  | vvi-miR395c *-5_perfect match  |
| vvi miR-1080 2mut as | cccagcgaagtcgtaagggg  | probe                          |
| vvi miR-1081 nat as  | tggtcaggggaactctaggg  | vvi-miR395c *-5_mismatch probe |
|                      |                       | vvi-miR395c *+5_perfect match  |
|                      |                       | probe                          |
|                      |                       | vvi-miR395d *-5_perfect match  |
|                      |                       | probe                          |

|                                                                                               |                                                                                             |                                                                                                                                                   |
|-----------------------------------------------------------------------------------------------|---------------------------------------------------------------------------------------------|---------------------------------------------------------------------------------------------------------------------------------------------------|
| vvi miR-1081 2mut as                                                                          | tggtcaggtgaattctaggg                                                                        | vvi-miR395d *-5_mismatch probe<br>vvi-miR395d *+5_perfect match<br>probe                                                                          |
| vvi miR-1082 nat as <br>vvi miR-1082 2mut as                                                  | cccaatgaagtggcagggg<br>cccaataaagtcgtcagggg                                                 | vvi-miR395d *+5_mismatch probe<br>vvi-miR395e *-5_perfect match<br>probe                                                                          |
| vvi miR-1083 nat as <br>vvi miR-1083 2mut as                                                  | tggtcaagggaactctaggg<br>tggtcaagtgaattctaggg                                                | vvi-miR395e *-5_mismatch probe<br>vvi-miR395e *+5_perfect match<br>probe                                                                          |
| vvi miR-1084 nat as <br>vvi miR-1084 2mut as <br>vvi miR-1085 nat as <br>vvi miR-1085 2mut as | cccagtgaagtggcagggg<br>cccagcgaagtcgtcagggg<br>tggtcaggggaactctaggg<br>tggtcaggtgaattctaggg | vvi-miR395e *+5_mismatch probe<br>vvi-miR395f *-5_perfect match probe<br>vvi-miR395f *-5_mismatch probe<br>vvi-miR395f *+5_perfect match<br>probe |
| vvi miR-1086 nat as <br>vvi miR-1086 2mut as                                                  | cccagtgaagtggcagggg<br>cccagcgaagtcgtcagggg                                                 | vvi-miR395f *+5_mismatch probe<br>vvi-miR395g *-5_perfect match<br>probe                                                                          |
| vvi miR-1087 nat as <br>vvi miR-1087 2mut as                                                  | tgctcaggggaactctaggg<br>tgctcaggtgaattctaggg                                                | vvi-miR395g *-5_mismatch probe<br>vvi-miR395g *+5_perfect match<br>probe                                                                          |
| vvi miR-1088 nat as <br>vvi miR-1088 2mut as                                                  | cccaatgaagtgtcagggg<br>cccaataaagtcctcagggg                                                 | vvi-miR395g *+5_mismatch probe<br>vvi-miR395h *-5_perfect match<br>probe                                                                          |
| vvi miR-1089 nat as <br>vvi miR-1089 2mut as                                                  | tggtcaagggaactctaggg<br>tggtcaagtgaattctaggg                                                | vvi-miR395h *-5_mismatch probe<br>vvi-miR395h *+5_perfect match<br>probe                                                                          |
| vvi miR-1090 nat as <br>vvi miR-1090 2mut as <br>vvi miR-1091 nat as <br>vvi miR-1091 2mut as | cccagtgaagtggcagggg<br>cccagcgaagtcgtcagggg<br>tggtcaggggaactctaggg<br>tggtcaggtgaattctaggg | vvi-miR395h *+5_mismatch probe<br>vvi-miR395i *-5_perfect match probe<br>vvi-miR395i *-5_mismatch probe<br>vvi-miR395i *+5_perfect match<br>probe |
| vvi miR-1092 nat as <br>vvi miR-1092 2mut as <br>vvi miR-1093 nat as <br>vvi miR-1093 2mut as | cccagtgaagtggcagggg<br>cccagcgaagtcgtcagggg<br>tggtcaggggaactctaggg<br>tggtcaggtgaattctaggg | vvi-miR395i *+5_mismatch probe<br>vvi-miR395j *-5_perfect match probe<br>vvi-miR395j *-5_mismatch probe                                           |

|                      |                       |                  |                |
|----------------------|-----------------------|------------------|----------------|
| vvi miR-1094 nat as  | cccagtgaagtggtcagggg  | vvi-miR395j *+5_ | perfect match  |
| vvi miR-1094 2mut as | cccagcgaagtcgtcagggg  | probe            |                |
|                      |                       | vvi-miR395j *+5_ | mismatch probe |
| vvi miR-1095 nat as  | tggcaagggaaactctaggg  | vvi-miR395k *-5_ | perfect match  |
| vvi miR-1095 2mut as | tggcaagtgaattctaggg   | probe            |                |
|                      |                       | vvi-miR395k *-5_ | mismatch probe |
| vvi miR-1096 nat as  | cccagtgaagtggcaaggg   | vvi-miR395k *+5_ | perfect match  |
| vvi miR-1096 2mut as | cccagcgaagtcgtcaaggg  | probe            |                |
| vvi miR-1097 nat as  | tggtcaggggaactctaggg  | vvi-miR395k *+5_ | mismatch probe |
| vvi miR-1097 2mut as | tggtcaggtgaattctaggg  | vvi-miR395l *-5_ | perfect match  |
|                      |                       | probe            |                |
| vvi miR-1098 nat as  | cccagtgaagtggtcagggg  | vvi-miR395l *-5_ | mismatch probe |
| vvi miR-1098 2mut as | cccagcgaagtcgtcagggg  | vvi-miR395m *-5_ | perfect match  |
|                      |                       | probe            |                |
| vvi miR-1099 nat as  | tgttcaagggaaactctaggg | vvi-miR395m *-5_ | mismatch probe |
| vvi miR-1099 2mut as | tgttcaagtgaattctaggg  | vvi-miR395m *+5_ | perfect match  |
|                      |                       | probe            |                |
| vvi miR-1100 nat as  | cccagtgaagtgttcaaggg  | vvi-miR395m *+5_ | mismatch probe |
| vvi miR-1100 2mut as | cccagcgaagcgttcaaggg  | vvi-miR395n *-5_ | perfect match  |
|                      |                       | probe            |                |
| vvi miR-1101 nat as  | ggggtgggggaactctcaag  | vvi-miR395n *-5_ | mismatch probe |
| vvi miR-1101 2mut as | ggggtgggtgaattctcaag  | vvi-miR395n *+5_ | perfect match  |
|                      |                       | probe            |                |
| vvi miR-1102 nat as  | tcatactggaggggttgggg  | vvi-miR395n *+5_ | mismatch probe |
| vvi miR-1102 2mut as | tcatactgaggtgttgggg   | vvi-miR396a *-5_ | perfect match  |
|                      |                       | probe            |                |
| vvi miR-1103 nat as  | cagctttctgaactacttt   | vvi-miR396a *-5_ | mismatch probe |
| vvi miR-1103 2mut as | cagctttttaactacttt    | vvi-miR396a *+5_ | perfect match  |
|                      |                       | probe            |                |
| vvi miR-1104 nat as  | ctttccacagctttcttga   | vvi-miR396a *+5_ | mismatch probe |
| vvi miR-1104 2mut as | ctttcaacagttttcttga   | vvi-miR396b *-5_ | perfect match  |
|                      |                       | probe            |                |
| vvi miR-1105 nat as  | agctttcttgaacttcttct  |                  |                |

|                      |                       |                                |
|----------------------|-----------------------|--------------------------------|
| vvi miR-1105 nat as  | agctttcttaaattcttct   | vvi-miR396b *-5_mismatch probe |
| vvi miR-1106 nat as  | atgctttccacagctttct   | vvi-miR396b *+5_perfect match  |
| vvi miR-1106 2mut as | atgctttcaacagtttct    | probe                          |
| vvi miR-1107 nat as  | aactttcctgagctgttggt  | vvi-miR396b *+5_mismatch probe |
| vvi miR-1107 2mut as | aacttttctgagttgttggt  | vvi-miR396c *-5_perfect match  |
| vvi miR-1108 nat as  | taatgtccacaacttctct   | probe                          |
| vvi miR-1108 2mut as | taatgttcaaaaacttctct  | vvi-miR396c *-5_mismatch probe |
| vvi miR-1109 nat as  | agctttattgaaccgcaact  | vvi-miR396c *+5_perfect match  |
| vvi miR-1109 2mut as | agctttattaaacccaact   | probe                          |
| vvi miR-1110 nat as  | tatcttcccacagctttatt  | vvi-miR396d *-5_mismatch probe |
| vvi miR-1110 2mut as | tatcttctcacagttttatt  | vvi-miR396d *+5_perfect match  |
| vvi miR-1111 nat as  | agtgcagcgccaatggaatc  | probe                          |
| vvi miR-1111 2mut as | agtgcagcccaatcgaatc   | vvi-miR396d *+5_mismatch probe |
| vvi miR-1112 nat as  | gacatgattgagtcgagcg   | vvi-miR397a *-5_perfect match  |
| vvi miR-1112 2mut as | gacatgattaagtgaagcg   | probe                          |
| vvi miR-1113 nat as  | agtgcagcgccaatggaatc  | vvi-miR397a *-5_mismatch probe |
| vvi miR-1113 2mut as | agtgcagcccaatcgaatc   | vvi-miR397a *+5_perfect match  |
| vvi miR-1114 nat as  | gacatgattgagtcgagcg   | probe                          |
| vvi miR-1114 2mut as | gacatgattaagtgaagcg   | vvi-miR397a *+5_mismatch probe |
| vvi miR-1115 nat as  | caggtgccactcccttgggg  | vvi-miR397b *-5_perfect match  |
| vvi miR-1115 2mut as | caggtgtcactctcttgggg  | probe                          |
| vvi miR-1116 nat as  | aaccggtgttctcaggtgcc  | vvi-miR397b *-5_mismatch probe |
| vvi miR-1116 2mut as | aaccagtggttctcagctgcc | vvi-miR397b *+5_perfect match  |
|                      |                       | probe                          |
|                      |                       | vvi-miR398a *-5_mismatch probe |
|                      |                       | vvi-miR398a *+5_perfect match  |
|                      |                       | probe                          |
|                      |                       | vvi-miR398a *-5_mismatch probe |
|                      |                       | vvi-miR398a *+5_mismatch probe |

|                      |                      |                                |
|----------------------|----------------------|--------------------------------|
| vvi miR-1117 nat as  | ctcaggtcacacctgtagga | vvi-miR398b *-5_perfect match  |
| vvi miR-1117 2mut as | ctcagctcacatctgtagga | probe                          |
|                      |                      | vvi-miR398b *-5_mismatch probe |
| vvi miR-1118 nat as  | gggcatgtgattctcaggtc | vvi-miR398b *+5_perfect match  |
| vvi miR-1118 2mut as | gggcatgcgattctccggtc | probe                          |
|                      |                      | vvi-miR398b *+5_mismatch probe |
| vvi miR-1119 nat as  | ctcaggtcactcctgtagga | vvi-miR398c *-5_perfect match  |
| vvi miR-1119 2mut as | ctcagctcacttctgtagga | probe                          |
|                      |                      | vvi-miR398c *-5_mismatch probe |
| vvi miR-1120 nat as  | gggcatgtgattctcaggtc | vvi-miR398c *+5_perfect match  |
| vvi miR-1120 2mut as | gggcatgcgattctccggtc | probe                          |
|                      |                      | vvi-miR398c *+5_mismatch probe |
| vvi miR-1121 nat as  | aggagaatcacactgttatt | vvi-miR399a *-5_perfect match  |
| vvi miR-1121 2mut as | aggagaatccccctgttatt | probe                          |
|                      |                      | vvi-miR399a *-5_mismatch probe |
| vvi miR-1122 nat as  | atctctgccaaggagaatc  | vvi-miR399a *+5_perfect match  |
| vvi miR-1122 2mut as | atctctgtcaaagaagaatc | probe                          |
|                      |                      | vvi-miR399a *+5_mismatch probe |
| vvi miR-1123 nat as  | gaaagaggtgcctatgatt  | vvi-miR399b *-5_perfect match  |
| vvi miR-1123 2mut as | gaaagaggtctcctatgatt | probe                          |
|                      |                      | vvi-miR399b *-5_mismatch probe |
| vvi miR-1124 nat as  | gtgcctgccaagaaagaggt | vvi-miR399b *+5_perfect match  |
| vvi miR-1124 2mut as | gtgcctgtcaagaaacaggt | probe                          |
|                      |                      | vvi-miR399b *+5_mismatch probe |
| vvi miR-1125 nat as  | gtgaaagaggcctgagacc  | vvi-miR399c *-5_perfect match  |
| vvi miR-1125 2mut as | gtgaaagagctcctgagacc | probe                          |
|                      |                      | vvi-miR399c *-5_mismatch probe |
| vvi miR-1126 nat as  | tcacctaccaagtgaaagag | vvi-miR399c *+5_perfect match  |
| vvi miR-1126 2mut as | tcacctacaaagcgaagag  | probe                          |
|                      |                      | vvi-miR399c *+5_mismatch probe |
| vvi miR-1127 nat as  | aaaagaaatctgctctataa | vvi-miR399d *-5_perfect match  |
| vvi miR-1127 2mut as | aaaagaaatttctctataa  | probe                          |
|                      |                      | vvi-miR399d *-5_mismatch probe |
| vvi miR-1128 nat as  | ccatctgccaagaaatct   | vvi-miR399d *+5_perfect match  |

|                      |                      |                                                                          |
|----------------------|----------------------|--------------------------------------------------------------------------|
| vvi miR-1128 2mut as | ccatctgtcaaaacaaatct | probe<br>vvi-miR399d *+5_mismatch probe<br>vvi-miR399e *-5_perfect match |
| vvi miR-1129 nat as  | aaagataattgacctgtaa  | probe                                                                    |
| vvi miR-1129 2mut as | aaagctaattgtcctgtaa  | vvi-miR399e *-5_mismatch probe<br>vvi-miR399e *+5_perfect match          |
| vvi miR-1130 nat as  | ctgcctgccaaaagataatt | probe                                                                    |
| vvi miR-1130 2mut as | ctgcctgtcaaaacataatt | vvi-miR399e *+5_mismatch probe                                           |
| vvi miR-1131 nat as  | ttggccctctaatac      | vvi-miR399f *-5_perfect match probe                                      |
| vvi miR-1131 2mut as | ttggctctcaatccaac    | vvi-miR399f *-5_mismatch probe<br>vvi-miR399f *+5_perfect match          |
| vvi miR-1132 nat as  | cttcctgccaagcagattt  | probe                                                                    |
| vvi miR-1132 2mut as | cttcctgtcaagaagattt  | vvi-miR399f *+5_mismatch probe<br>vvi-miR399g *-5_perfect match          |
| vvi miR-1133 nat as  | aatggagtattgccagcaa  | probe                                                                    |
| vvi miR-1133 2mut as | aatgaagtattgtccagcaa | vvi-miR399g *-5_mismatch probe<br>vvi-miR399g *+5_perfect match          |
| vvi miR-1134 nat as  | ccaactgccaatggagtatt | probe                                                                    |
| vvi miR-1134 2mut as | ccaactgtcaatcgagtatt | vvi-miR399g *+5_mismatch probe<br>vvi-miR399h *-5_perfect match          |
| vvi miR-1135 nat as  | aggaggattgcactgttatt | probe                                                                    |
| vvi miR-1135 2mut as | aggaggattcaactgttatt | vvi-miR399h *-5_mismatch probe<br>vvi-miR399h *+5_perfect match          |
| vvi miR-1136 nat as  | ctttctgccaaggaggatt  | probe                                                                    |
| vvi miR-1136 2mut as | ctttctgtcaagaaggatt  | vvi-miR399h *+5_mismatch probe                                           |
| vvi miR-1137 nat as  | aggagagaagcctacaact  | vvi-miR399i *-5_perfect match probe                                      |
| vvi miR-1137 2mut as | aggagagaactcctacaact | vvi-miR399i *-5_mismatch probe<br>vvi-miR399i *+5_perfect match          |
| vvi miR-1138 nat as  | ctcctgccagaaggagagaa | probe                                                                    |
| vvi miR-1138 2mut as | ctcctgtcagaagaagagaa | vvi-miR399i *+5_mismatch probe<br>vvi-miR403a *-5_perfect match          |
| vvi miR-1139 nat as  | attcacgcacaaacttgaga | probe                                                                    |
| vvi miR-1139 2mut as | attcaccacaaatttgaga  | vvi-miR403a *-5_mismatch probe                                           |
| vvi miR-1140 nat as  | tggggtttgattcacgcaca | vvi-miR403a *+5_perfect match                                            |

|                      |                      |                                     |
|----------------------|----------------------|-------------------------------------|
| vvi miR-1140 nat as  | tgggctttgattcaccaca  | probe                               |
| vvi miR-1140 2mut as |                      | vvi-miR403a *+5_mismatch probe      |
| vvi miR-1141 nat as  | tcgcgcacaaactcgaggtt | vvi-miR403b *-5_perfect match       |
| vvi miR-1141 2mut as | tcgcccacaaactagaggtt | probe                               |
| vvi miR-1142 nat as  | aggcgttggattcgcgcaca | vvi-miR403b *-5_mismatch probe      |
| vvi miR-1142 2mut as | aggccttgattcgcccaca  | vvi-miR403b *+5_perfect match       |
| vvi miR-1143 nat as  | tcacgcacaaacttgagatg | probe                               |
| vvi miR-1143 2mut as | tcaccacaaacttaagatg  | vvi-miR403b *+5_mismatch probe      |
| vvi miR-1144 nat as  | tggggtttgattcacgcaca | vvi-miR403c *-5_perfect match       |
| vvi miR-1144 2mut as | tgggctttgattcaccaca  | probe                               |
| vvi miR-1145 nat as  | tcgcgcacaaactcgaggtt | vvi-miR403c *-5_mismatch probe      |
| vvi miR-1145 2mut as | tcgcccacaaactagaggtt | vvi-miR403c *+5_perfect match       |
| vvi miR-1146 nat as  | ggttgattcgcgcacaaac  | probe                               |
| vvi miR-1146 2mut as | ggttgattgcccacaaac   | vvi-miR403c *+5_mismatch probe      |
| vvi miR-1147 nat as  | tcacgcacaaacttgagatg | vvi-miR403d *-5_perfect match       |
| vvi miR-1147 2mut as | tcaccacaaacttaagatg  | probe                               |
| vvi miR-1148 nat as  | tggggtttgattcacgcaca | vvi-miR403d *-5_mismatch probe      |
| vvi miR-1148 2mut as | tgggctttgattcaccaca  | vvi-miR403d *+5_perfect match       |
| vvi miR-1149 nat as  | gtcacgcacaaactcctcat | probe                               |
| vvi miR-1149 2mut as | gtcaccacaaacttctcat  | vvi-miR403d *+5_mismatch probe      |
| vvi miR-1150 nat as  | cggtttagagtcacgcaca  | vvi-miR403e *-5_perfect match       |
| vvi miR-1150 2mut as | cggtttagcgtcaccaca   | probe                               |
| vvi miR-1151 nat as  | actacctcgtcccgtcttc  | vvi-miR403e *+5_mismatch probe      |
| vvi miR-1151 2mut as | actacctcctccagtcttc  | vvi-miR403f *-5_perfect match probe |
| vvi miR-1152 nat as  | catcatgcactacctcgtc  | vvi-miR403f *-5_mismatch probe      |
|                      |                      | vvi-miR403f *+5_perfect match probe |

|                      |                      |                                     |
|----------------------|----------------------|-------------------------------------|
| vvi miR-1152 2mut as | catccatgaactatctcgtc | vvi-miR408 *+5_mismatch probe       |
| vvi miR-1153 nat as  | cccactgtcttccaactttc | vvi-miR477a *-5_perfect match probe |
| vvi miR-1153 2mut as | cccactctcttcaaactttc | vvi-miR477a *-5_mismatch probe      |
| vvi miR-1154 nat as  | ttccaagggtccccactgtc | vvi-miR477a *+5_perfect match probe |
| vvi miR-1154 2mut as | ttccaagctcctcactgtc  | vvi-miR477a *+5_mismatch probe      |
| vvi miR-1155 nat as  | ttggttcggctcgtctttga | vvi-miR479 *-5_perfect match probe  |
| vvi miR-1155 2mut as | ttggttcgcctcctctttga | vvi-miR479 *-5_mismatch probe       |
| vvi miR-1156 nat as  | caagagtgatattggttcgg | vvi-miR479 *+5_perfect match probe  |
| vvi miR-1156 2mut as | caagagcgatattcgttcgg | vvi-miR479 *+5_mismatch probe       |
| vvi miR-1157 nat as  | ctactctccaattccaaac  | vvi-miR482a *-5_perfect match probe |
| vvi miR-1157 2mut as | ctactctcaaattctcaaac | vvi-miR482a *-5_mismatch probe      |
| vvi miR-1158 nat as  | gctttcctactctccaattc | vvi-miR482a *+5_perfect match probe |
| vvi miR-1158 2mut as | gcttttctactctcaattc  | vvi-miR482a *+5_mismatch probe      |
| vvi miR-1159 nat as  | gagagagagcacgcctgtac | vvi-miR535a *-5_perfect match probe |
| vvi miR-1159 2mut as | gagagagagaaccctgtac  | vvi-miR535a *-5_mismatch probe      |
| vvi miR-1160 nat as  | ttgtatgacagcgagagaga | vvi-miR535a *+5_perfect match probe |
| vvi miR-1160 2mut as | ttgtatgaaagagagagaga | vvi-miR535a *+5_mismatch probe      |
| vvi miR-1161 nat as  | gagagagagcacgcctgtac | vvi-miR535b *-5_perfect match probe |
| vvi miR-1161 2mut as | gagagagagaaccctgtac  | vvi-miR535b *-5_mismatch probe      |
| vvi miR-1162 nat as  | ttgtatgacagcgagagaga | vvi-miR535b *+5_perfect match probe |
| vvi miR-1162 2mut as | ttgtatgaaagagagagaga | vvi-miR535b *+5_mismatch probe      |
| vvi miR-1163 nat as  | gagagagagcacgcctgtac | vvi-miR535c *-5_perfect match probe |
| vvi miR-1163 2mut as | gagagagagaaccctgtac  | vvi-miR535c *-5_mismatch probe      |
| vvi miR-1164 nat as  | ttgtatgacagcgagagaga | vvi-miR535c *+5_perfect match probe |

|                      |                      |                                |
|----------------------|----------------------|--------------------------------|
| vvi miR-1164 2mut as | ttgtatgaaagagagagaga | vvi-miR535c *+5_mismatch probe |
| vvi miR-1165 nat as  | gacagagagcacgcctgtac | vvi-miR535d *-5_perfect match  |
| vvi miR-1165 2mut as | gacagagagaaccctgtac  | probe                          |
| vvi miR-1166 nat as  | ttgtatgacagcgacagaga | vvi-miR535d *-5_mismatch probe |
| vvi miR-1166 2mut as | ttgtatgaaagagacagaga | vvi-miR535d *+5_perfect match  |
| vvi miR-1167 nat as  | gacagagagcacgcctgtac | probe                          |
| vvi miR-1167 2mut as | gacagagagaaccctgtac  | vvi-miR535d *+5_mismatch probe |
| vvi miR-1168 nat as  | ttgtatgacagcgacagaga | vvi-miR535e *-5_perfect match  |
| vvi miR-1168 2mut as | ttgtatgaaagagacagaga | probe                          |
| vvi miR-1169 nat as  | caaatgagcatctcaacaac | vvi-miR535e *+5_mismatch probe |
| vvi miR-1169 2mut as | caaatgagaatctaaacaac | vvi-miR535e *+5_perfect match  |
| vvi miR-1170 nat as  | ggttgcttcctcaaatgagc | probe                          |
| vvi miR-1170 2mut as | ggttccttcctcaaatgagc | vvi-miR828a *-5_mismatch probe |
| vvi miR-1171 nat as  | ggaaatgactatccaggttg | vvi-miR828a *+5_perfect match  |
| vvi miR-1171 2mut as | ggaaatgcctatcaaggttg | probe                          |
| vvi miR-1172 nat as  | tggtttgcaggaaatgact  | vvi-miR828a *+5_mismatch probe |
| vvi miR-1172 2mut as | tggtttgaagaaaatgact  | vvi-miR828b *-5_perfect match  |
| vvi miR-1173 nat as  | catgaaggaactaatcaagt | probe                          |
| vvi miR-1173 2mut as | catgaagaaactaataaagt | vvi-miR828b *+5_mismatch probe |
| vvi miR-1174 nat as  | tgcaataactcatgaaggaa | vvi-miR845a *-5_perfect match  |
| vvi miR-1174 2mut as | tgcaataattcataaaggaa | probe                          |
| vvi miR-1175 nat as  | catgaaggaactaatcaagt | vvi-miR845a *+5_mismatch probe |
| vvi miR-1175 2mut as | catgaagaaactaataaagt | vvi-miR845a *+5_perfect match  |
|                      |                      | probe                          |
|                      |                      | vvi-miR845b *-5_mismatch probe |

|                      |                       |                                 |
|----------------------|-----------------------|---------------------------------|
| vvi miR-1176 nat as  | gaaataactcatgaaggaac  | vvi-miR845b *+5_perfect match   |
| vvi miR-1176 2mut as | gaaataactaatgaacgaac  | probe                           |
|                      |                       | vvi-miR845b *+5_mismatch probe  |
| vvi miR-1177 nat as  | cagacaacccaaaacacataa | vvi-miR845c *-5_perfect match   |
| vvi miR-1177 2mut as | cagacaacccaaaacccataa | probe                           |
|                      |                       | vvi-miR845c *-5_mismatch probe  |
| vvi miR-1178 nat as  | acatgaaactcagacaacca  | vvi-miR845c *+5_perfect match   |
| vvi miR-1178 2mut as | acataaaactcagaaaacca  | probe                           |
|                      |                       | vvi-miR845c *+5_mismatch probe  |
| vvi miR-1179 nat as  | tagggataattaatgttggt  | vvi-miR845d *-5_perfect match   |
| vvi miR-1179 2mut as | taggaataattaatcttggt  | probe                           |
|                      |                       | vvi-miR845d *-5_mismatch probe  |
| vvi miR-1180 nat as  | tcccatggccctagggataa  | vvi-miR845d *+5_perfect match   |
| vvi miR-1180 2mut as | tcccatggtcctagtgataa  | probe                           |
|                      |                       | vvi-miR845d *+5_mismatch probe  |
| vvi miR-1181 nat as  | tagggataattaatgtgcgt  | vvi-miR845e *-5_perfect match   |
| vvi miR-1181 2mut as | taggaataattaatgcgcgt  | probe                           |
|                      |                       | vvi-miR845e *-5_mismatch probe  |
| vvi miR-1182 nat as  | tcccatggccctagggataa  | vvi-miR845e *+5_perfect match   |
| vvi miR-1182 2mut as | tcccatggtcctagtgataa  | probe                           |
|                      |                       | vvi-miR845e *+5_mismatch probe  |
| vvi miR-1183 nat as  | gagagagcacactccaaga   | vvi-miR156a *-10_perfect match  |
| vvi miR-1183 2mut as | gagagagaacactctcaaga  | probe                           |
|                      |                       | vvi-miR156a *-10_mismatch probe |
| vvi miR-1184 nat as  | gtgtgatgatgacagaagaa  | vvi-miR156a *+10_perfect match  |
| vvi miR-1184 2mut as | gtgtgataatgaaagaagaa  | probe                           |
|                      |                       | vvi-miR156a *+10_mismatch probe |
| vvi miR-1185 nat as  | aatgagcacgcaaaagcaa   | vvi-miR156b *-10_perfect match  |
| vvi miR-1185 2mut as | aatgagaacccaaaagcaa   | probe                           |
|                      |                       | vvi-miR156b *-10_mismatch probe |
| vvi miR-1186 nat as  | ctggaagctgacagaaagag  | vvi-miR156b *+10_perfect match  |
| vvi miR-1186 2mut as | ctggaagttgaaagaagag   | probe                           |
|                      |                       | vvi-miR156b *+10_mismatch probe |
| vvi miR-1187 nat as  | gagtgagcacgcagagcttc  | vvi-miR156c *-10_perfect match  |

|                                                                                               |                                                                                              |                                                                                                                                                                                                   |
|-----------------------------------------------------------------------------------------------|----------------------------------------------------------------------------------------------|---------------------------------------------------------------------------------------------------------------------------------------------------------------------------------------------------|
| vvi miR-1187 2mut as                                                                          | gagtgagaaccagagcttc                                                                          | probe<br>vvi-miR156c <sup>*</sup> -10_mismatch probe<br>vvi-miR156c <sup>*</sup> +10_perfect match                                                                                                |
| vvi miR-1188 nat as <br>vvi miR-1188 2mut as                                                  | gaggacagatgacagataga<br>gaggaaagatgaaagataga                                                 | probe<br>vvi-miR156c <sup>*</sup> +10_mismatch probe<br>vvi-miR156d <sup>*</sup> -10_perfect match                                                                                                |
| vvi miR-1189 nat as <br>vvi miR-1189 2mut as                                                  | aggtgagcacgcaccggcat<br>aggtgagaaccaccggcat                                                  | probe<br>vvi-miR156d <sup>*</sup> -10_mismatch probe<br>vvi-miR156d <sup>*</sup> +10_perfect match                                                                                                |
| vvi miR-1190 nat as <br>vvi miR-1190 2mut as                                                  | cctgaagctgacagaaagag<br>cctgaagttgaaagaaagag                                                 | probe<br>vvi-miR156d <sup>*</sup> +10_mismatch probe<br>vvi-miR156e <sup>*</sup> -10_perfect match                                                                                                |
| vvi miR-1191 nat as <br>vvi miR-1191 2mut as                                                  | gagtaagcacacagagcttc<br>gagtaagaacacagaccttc                                                 | probe<br>vvi-miR156e <sup>*</sup> -10_mismatch probe<br>vvi-miR156e <sup>*</sup> +10_perfect match                                                                                                |
| vvi miR-1192 nat as <br>vvi miR-1192 2mut as                                                  | cttgaggggtgacagatagg<br>cttgaggtgtgaaagatagg                                                 | probe<br>vvi-miR156e <sup>*</sup> +10_mismatch probe<br>vvi-miR156f <sup>*</sup> -10_perfect match                                                                                                |
| vvi miR-1193 nat as <br>vvi miR-1193 2mut as <br>vvi miR-1194 nat as <br>vvi miR-1194 2mut as | gagagaggacaagactgctc<br>gagagagaacaagcctgctc<br>gacaggagaagagagaggac<br>gacagaagaagagagcggac | probe<br>vvi-miR156f <sup>*</sup> -10_mismatch probe<br>vvi-miR156f <sup>*</sup> 0_perfect match probe<br>vvi-miR156f <sup>*</sup> 0_mismatch probe<br>vvi-miR156f <sup>*</sup> +10_perfect match |
| vvi miR-1195 nat as <br>vvi miR-1195 2mut as                                                  | aagttctgtgacaggagaa<br>aagttctctgacagaagaa                                                   | probe<br>vvi-miR156f <sup>*</sup> +10_mismatch probe<br>vvi-miR156g <sup>*</sup> -10_perfect match                                                                                                |
| vvi miR-1196 nat as <br>vvi miR-1196 2mut as <br>vvi miR-1197 nat as <br>vvi miR-1197 2mut as | tagagagcacaaggagtga<br>tagagagaacaagaagtga<br>gacagaagtctagagagcac<br>gacagaagcctagagcgcac   | probe<br>vvi-miR156g <sup>*</sup> -10_mismatch probe<br>vvi-miR156g <sup>*</sup> 0_perfect match probe<br>vvi-miR156g <sup>*</sup> 0_mismatch probe<br>vvi-miR156g <sup>*</sup> +10_perfect match |
| vvi miR-1198 nat as <br>vvi miR-1198 2mut as <br>vvi miR-1199 nat as                          | ctgaggtgatgacagaagtc<br>ctgagctgatgaaagaagtc<br>cagaaagaactcagctgatc                         | probe<br>vvi-miR156g <sup>*</sup> +10_mismatch probe<br>vvi-miR156h <sup>*</sup> -10_perfect match                                                                                                |

|                      |                      |                                                                            |
|----------------------|----------------------|----------------------------------------------------------------------------|
| vvi miR-1199 2mut as | cagaaagaattcagttgatc | probe<br>vvi-miR156h *-10_mismatch probe<br>vvi-miR156h *+10_perfect match |
| vvi miR-1200 nat as  | gcaggacacaatgaaaggcg | probe                                                                      |
| vvi miR-1200 2mut as | gcagaacacaataaaaggcg | vvi-miR156h *+10_mismatch probe<br>vvi-miR156i *-10_perfect match          |
| vvi miR-1201 nat as  | tagagagcacaaggagtga  | probe                                                                      |
| vvi miR-1201 2mut as | tagagagaacaaagaagtga | vvi-miR156i *-10_mismatch probe<br>vvi-miR156i *+10_perfect match          |
| vvi miR-1202 nat as  | ttaaggtgatgacagaagaa | probe                                                                      |
| vvi miR-1202 2mut as | ttaagctgatgaaagaagaa | vvi-miR156i *+10_mismatch probe<br>vvi-miR159a *-10_perfect match          |
| vvi miR-1203 nat as  | aggagctcccataaaccc   | probe                                                                      |
| vvi miR-1203 2mut as | aggagctctaataaaccc   | vvi-miR159a *-10_mismatch probe                                            |
| vvi miR-1204 nat as  | tggagcgtaaaggagctccc | vvi-miR159a *0_perfect match probe                                         |
| vvi miR-1204 2mut as | tggagagtaaaggagtccc  | vvi-miR159a *0_mismatch probe<br>vvi-miR159a *+10_perfect match            |
| vvi miR-1205 nat as  | ctttcagaactggagcgtaa | probe                                                                      |
| vvi miR-1205 2mut as | ctttccgaactggagagtaa | vvi-miR159a *+10_mismatch probe<br>vvi-miR159b *-10_perfect match          |
| vvi miR-1206 nat as  | gaagctcccacaagccc    | probe                                                                      |
| vvi miR-1206 2mut as | gaagctctcccagccc     | vvi-miR159b *-10_mismatch probe                                            |
| vvi miR-1207 nat as  | ggagtgtaaagaagctccca | vvi-miR159b *0_perfect match probe                                         |
| vvi miR-1207 2mut as | ggagcgtaaagaagttccca | vvi-miR159b *0_mismatch probe<br>vvi-miR159b *+10_perfect match            |
| vvi miR-1208 nat as  | tttcagttctggagtgtaaa | probe                                                                      |
| vvi miR-1208 2mut as | tttcagttcccagtgtaaa  | vvi-miR159b *+10_mismatch probe<br>vvi-miR159c *-10_perfect match          |
| vvi miR-1209 nat as  | aggagctccactcaaaaa   | probe                                                                      |
| vvi miR-1209 2mut as | aggagttccactcaaaaa   | vvi-miR159c *-10_mismatch probe                                            |
| vvi miR-1210 nat as  | ttggactcaaggagctcca  | vvi-miR159c *0_perfect match probe                                         |
| vvi miR-1210 2mut as | ttggcctcaaggagttcca  | vvi-miR159c *0_mismatch probe<br>vvi-miR159c *+10_perfect match            |
| vvi miR-1211 nat as  | agaccctctattggacttca | probe                                                                      |

|                      |                       |                                                                            |
|----------------------|-----------------------|----------------------------------------------------------------------------|
| vvi miR-1211 2mut as | agactctctattcgacttca  | vvi-miR159c *+10_mismatch probe<br>vvi-miR160a *-10_perfect match<br>probe |
| vvi miR-1212 nat as  | tctgatgccaaactaggaaga | vvi-miR160a *-10_mismatch probe                                            |
| vvi miR-1212 2mut as | tctgatgtcaactagaaaga  | vvi-miR160a *0_perfect match probe                                         |
| vvi miR-1213 nat as  | gcatgactcctctgatgcc   | vvi-miR160a *0_mismatch probe                                              |
| vvi miR-1213 2mut as | gcatgacttctccgatgcc   | vvi-miR160a *+10_perfect match<br>probe                                    |
| vvi miR-1214 nat as  | gttggggcctgcatgactcc  | vvi-miR160a *+10_mismatch probe                                            |
| vvi miR-1214 2mut as | gttggggctgaatgactcc   | vvi-miR160b *-10_perfect match<br>probe                                    |
| vvi miR-1215 nat as  | cctcatgccaaataggaagg  | vvi-miR160b *-10_mismatch probe                                            |
| vvi miR-1215 2mut as | cctcatgtcaaatagaaagg  | vvi-miR160b *0_perfect match probe                                         |
| vvi miR-1216 nat as  | gcttgactcccctcatgcc   | vvi-miR160b *0_mismatch probe                                              |
| vvi miR-1216 2mut as | gcttgactcttctcatgcc   | vvi-miR160b *+10_perfect match<br>probe                                    |
| vvi miR-1217 nat as  | tgtttcgctgcttgactcc   | vvi-miR160b *+10_mismatch probe                                            |
| vvi miR-1217 2mut as | tgtttcccctccttgactcc  | vvi-miR160c *-10_perfect match<br>probe                                    |
| vvi miR-1218 nat as  | tcgcacgccaccgcaaata   | vvi-miR160c *-10_mismatch probe                                            |
| vvi miR-1218 2mut as | tcgcacccccccccaaata   | vvi-miR160c *0_perfect match probe                                         |
| vvi miR-1219 nat as  | gcttgctcctcgcacgcc    | vvi-miR160c *0_mismatch probe                                              |
| vvi miR-1219 2mut as | gcttgctcctcccacgcc    | vvi-miR160c *+10_perfect match<br>probe                                    |
| vvi miR-1220 nat as  | tggtgggtatgcttgctcc   | vvi-miR160c *+10_mismatch probe                                            |
| vvi miR-1220 2mut as | tggtgtgtatgcttgctcc   | vvi-miR160d *-10_perfect match<br>probe                                    |
| vvi miR-1221 nat as  | tcgcacgccatccgcgaagg  | vvi-miR160d *-10_mismatch probe                                            |
| vvi miR-1221 2mut as | tcgcacccatccgagaagg   | vvi-miR160d *0_perfect match probe                                         |
| vvi miR-1222 nat as  | gcatggctcctcgcacgcc   | vvi-miR160d *0_mismatch probe                                              |
| vvi miR-1222 2mut as | gcatgctcctcccacgcc    | vvi-miR160d *+10_perfect match<br>probe                                    |
| vvi miR-1223 nat as  | caagatgcatgcatggctcc  | vvi-miR160d *+10_mismatch probe                                            |
| vvi miR-1223 2mut as | caagatgaatgcatgctcc   | vvi-miR160e *-10_perfect match                                             |
| vvi miR-1224 nat as  | cctcatgccaaataggaagg  |                                                                            |

|                      |                      |                                    |
|----------------------|----------------------|------------------------------------|
| vvi miR-1224 2mut as | cctcatgtcaaatagaaagg | probe                              |
| vvi miR-1225 nat as  | gcttgactcccctcatgcc  | vvi-miR160e *-10_mismatch probe    |
| vvi miR-1225 2mut as | gcttgactcttctcatgcc  | vvi-miR160e *0_perfect match probe |
|                      |                      | vvi-miR160e *0_mismatch probe      |
|                      |                      | vvi-miR160e *+10_perfect match     |
| vvi miR-1226 nat as  | tgtttcgcctgcttgactcc | probe                              |
| vvi miR-1226 2mut as | tgtttcccctccttgactcc | vvi-miR160e *+10_mismatch probe    |
|                      |                      | vvi-miR160f *-10_perfect match     |
|                      |                      | probe                              |
| vvi miR-1227 nat as  | tcatacgccatccacgaagg | vvi-miR160f *-10_mismatch probe    |
| vvi miR-1227 2mut as | tcatacccctccaagaagg  | vvi-miR160f *0_perfect match probe |
| vvi miR-1228 nat as  | gcatggctcctcatagcca  | vvi-miR160f *0_mismatch probe      |
| vvi miR-1228 2mut as | gcatgcctcctcataagcca | vvi-miR160f *+10_perfect match     |
|                      |                      | probe                              |
| vvi miR-1229 nat as  | tggggcatatgcatggctcc | vvi-miR160f *+10_mismatch probe    |
| vvi miR-1229 2mut as | tgggccatgcatgcctcc   | vvi-miR162 *-10_perfect match      |
|                      |                      | probe                              |
| vvi miR-1230 nat as  | ctgcatccagtgacttca   | vvi-miR162 *-10_mismatch probe     |
| vvi miR-1230 2mut as | ctgcatcaagcgacttca   | vvi-miR162 *0_perfect match probe  |
| vvi miR-1231 nat as  | cgatgaaccgctgcatccag | vvi-miR162 *0_mismatch probe       |
| vvi miR-1231 2mut as | cgatgaaccctgaatccag  | vvi-miR162 *+10_perfect match      |
|                      |                      | probe                              |
| vvi miR-1232 nat as  | aggaagagatcgatgaaccg | vvi-miR162 *+10_mismatch probe     |
| vvi miR-1232 2mut as | aggaagcgatagatgaaccg | vvi-miR164a *-10_perfect match     |
|                      |                      | probe                              |
| vvi miR-1233 nat as  | gagcacgtgcaagcctgtgg | vvi-miR164a *-10_mismatch probe    |
| vvi miR-1233 2mut as | gagcacgtgaaagtctgtgg | vvi-miR164a *0_perfect match probe |
| vvi miR-1234 nat as  | tggagaaggggagcacgtgc | vvi-miR164a *0_mismatch probe      |
| vvi miR-1234 2mut as | tggagaaggtgagaacgtgc | vvi-miR164a *+10_perfect match     |
|                      |                      | probe                              |
| vvi miR-1235 nat as  | gaacctatgttgagaaggg  | vvi-miR164a *+10_mismatch probe    |
| vvi miR-1235 2mut as | gaactcatgttcgagaaggg | vvi-miR164b *-10_perfect match     |
|                      |                      | probe                              |
| vvi miR-1236 nat as  | agggcacatgtaaaatctca | vvi-miR164b *-10_mismatch probe    |
| vvi miR-1236 2mut as | agggaacatgtaaacctca  |                                    |

|                      |                      |                                      |
|----------------------|----------------------|--------------------------------------|
| vvi miR-1237 nat as  | tgggagagccaggccacatg | vvi-miR164b *0_perfect match probe   |
| vvi miR-1237 2mut as | tgggagagtcaggccacatg | vvi-miR164b *0_mismatch probe        |
| vvi miR-1238 nat as  | aggatccaagtgggagagcc | vvi-miR164b *+10_perfect match probe |
| vvi miR-1238 2mut as | aggatcaaagtgtgagagcc | vvi-miR164b *+10_mismatch probe      |
| vvi miR-1239 nat as  | agcacgtgcagagcagatta | vvi-miR164d *-10_perfect match probe |
| vvi miR-1239 2mut as | agcacgtgaagagaagatta | vvi-miR164d *-10_mismatch probe      |
| vvi miR-1240 nat as  | ggagaaggggagcacgtgca | vvi-miR164d *0_perfect match probe   |
| vvi miR-1240 2mut as | ggagaaggtgagaacgtgca | vvi-miR164d *0_mismatch probe        |
| vvi miR-1241 nat as  | aacctatgttgagaagggg  | vvi-miR164d *+10_perfect match probe |
| vvi miR-1241 2mut as | aaccaatgttcgagaagggg | vvi-miR164d *+10_mismatch probe      |
| vvi miR-1242 nat as  | aacattcccctcaaaatag  | vvi-miR166c *-10_perfect match probe |
| vvi miR-1242 2mut as | aacattcctctaaaaatag  | vvi-miR166c *-10_mismatch probe      |
| vvi miR-1243 nat as  | cgagccagacaacattcccc | vvi-miR166c *0_perfect match probe   |
| vvi miR-1243 2mut as | cgagtcagacaaaattcccc | vvi-miR166c *0_mismatch probe        |
| vvi miR-1244 nat as  | taagtgtcctcgagccagac | vvi-miR166c *+10_perfect match probe |
| vvi miR-1244 2mut as | taagtgttctcgagtcagac | vvi-miR166c *+10_mismatch probe      |
| vvi miR-1245 nat as  | acaatcccctcaaagcag   | vvi-miR166d *-10_perfect match probe |
| vvi miR-1245 2mut as | acaatcctctaaaagcag   | vvi-miR166d *-10_mismatch probe      |
| vvi miR-1246 nat as  | gagccagacaacaatcccct | vvi-miR166d *0_perfect match probe   |
| vvi miR-1246 2mut as | gagcaagacaacaatcccct | vvi-miR166d *0_mismatch probe        |
| vvi miR-1247 nat as  | tggtggcctcgagccagaca | vvi-miR166d *+10_perfect match probe |
| vvi miR-1247 2mut as | tggtggtctcgagtcagaca | vvi-miR166d *+10_mismatch probe      |
| vvi miR-1248 nat as  | aacattcccctcaaaacac  | vvi-miR166e *-10_perfect match probe |
| vvi miR-1248 2mut as | aacattcctctaaaaacac  | vvi-miR166e *-10_mismatch probe      |
| vvi miR-1249 nat as  | cgagccagacaacattcccc | vvi-miR166e *0_perfect match probe   |
| vvi miR-1249 2mut as | cgagtcagacaaaattcccc | vvi-miR166e *0_mismatch probe        |

|                      |                       |                                    |
|----------------------|-----------------------|------------------------------------|
| vvi miR-1250 nat as  | ttggtgtcctcgagccagac  | vvi-miR166e *+10_perfect match     |
| vvi miR-1250 2mut as | ttggtgttctcgagtcagac  | probe                              |
|                      |                       | vvi-miR166e *+10_mismatch probe    |
| vvi miR-1251 nat as  | aacattccccacaactaca   | vvi-miR166f *-10_perfect match     |
| vvi miR-1251 2mut as | aacattcctccccaaactaca | probe                              |
| vvi miR-1252 nat as  | cgagccagccaacattcccc  | vvi-miR166f *-10_mismatch probe    |
| vvi miR-1252 2mut as | cgagccagtcaaaattcccc  | vvi-miR166f *0_perfect match probe |
|                      |                       | vvi-miR166f *0_mismatch probe      |
| vvi miR-1253 nat as  | aagaaagcctcgagccagcc  | vvi-miR166f *+10_perfect match     |
| vvi miR-1253 2mut as | aagaaagtctcgagtcagcc  | probe                              |
|                      |                       | vvi-miR166f *+10_mismatch probe    |
| vvi miR-1254 nat as  | acattcccctcaactgtt    | vvi-miR166g *-10_perfect match     |
| vvi miR-1254 2mut as | acattcctctaaactgtt    | probe                              |
| vvi miR-1255 nat as  | gaaccagacaacattcccct  | vvi-miR166g *-10_mismatch probe    |
| vvi miR-1255 2mut as | gaacaagacaacattccct   | vvi-miR166g *0_perfect match probe |
|                      |                       | vvi-miR166g *0_mismatch probe      |
| vvi miR-1256 nat as  | gaaggatctcgaaccagaca  | vvi-miR166g *+10_perfect match     |
| vvi miR-1256 2mut as | gaaggatctaaaaccagaca  | probe                              |
|                      |                       | vvi-miR166g *+10_mismatch probe    |
| vvi miR-1257 nat as  | agcgttccccctcaactgtt  | vvi-miR166h *-10_perfect match     |
| vvi miR-1257 2mut as | agcgttctctaaactgtt    | probe                              |
| vvi miR-1258 nat as  | cgaaccagacagcgttcccc  | vvi-miR166h *-10_mismatch probe    |
| vvi miR-1258 2mut as | cgaacaagacagagttcccc  | vvi-miR166h *0_perfect match probe |
|                      |                       | vvi-miR166h *0_mismatch probe      |
| vvi miR-1259 nat as  | cgagtggctcgaaccagac   | vvi-miR166h *+10_perfect match     |
| vvi miR-1259 2mut as | cgagtcgtctagaaccagac  | probe                              |
|                      |                       | vvi-miR166h *+10_mismatch probe    |
| vvi miR-1260 nat as  | ctcattccaaacaccgc     | vvi-miR166a *-10_perfect match     |
| vvi miR-1260 2mut as | ctcattcaaaacatccgc    | probe                              |
| vvi miR-1261 nat as  | tggatcaaacctcattccaa  | vvi-miR166a *-10_mismatch probe    |
| vvi miR-1261 2mut as | tggatcaaatttcattccaa  | vvi-miR166a *0_perfect match probe |
|                      |                       | vvi-miR166a *0_mismatch probe      |
| vvi miR-1262 nat as  | ggaaggatcttggatcaaac  | vvi-miR166a *+10_perfect match     |
|                      |                       | probe                              |

|                      |                       |                                                                            |
|----------------------|-----------------------|----------------------------------------------------------------------------|
| vvi miR-1262 2mut as | ggaagaatcttcgatcaaac  | vvi-miR166a *+10_mismatch probe<br>vvi-miR166b *-10_perfect match<br>probe |
| vvi miR-1263 nat as  | aacattcccccaaaaaaac   | vvi-miR166b *-10_mismatch probe                                            |
| vvi miR-1263 2mut as | aacattcctctaaaaaac    | vvi-miR166b *0_perfect match probe                                         |
| vvi miR-1264 nat as  | cgagccagccaacattccccc | vvi-miR166b *0_mismatch probe                                              |
| vvi miR-1264 2mut as | cgagccagtcaaaattccccc | vvi-miR166b *+10_perfect match<br>probe                                    |
| vvi miR-1265 nat as  | gtgaatgcctcgagccagccc | vvi-miR166b *+10_mismatch probe                                            |
| vvi miR-1265 2mut as | gtgaatgtctcgagtcagccc | vvi-miR167a *-10_perfect match<br>probe                                    |
| vvi miR-1266 nat as  | agatgacctgatcatggaac  | vvi-miR167a *-10_mismatch probe                                            |
| vvi miR-1266 2mut as | agatgatctgatcatcgaaac | vvi-miR167a *0_perfect match probe                                         |
| vvi miR-1267 nat as  | tgaagctgcaagatgacctg  | vvi-miR167a *0_mismatch probe                                              |
| vvi miR-1267 2mut as | tgaagctgaaagatgcacctg | vvi-miR167a *+10_perfect match<br>probe                                    |
| vvi miR-1268 nat as  | agtgagtgattgaagctgca  | vvi-miR167a *+10_mismatch probe                                            |
| vvi miR-1268 2mut as | agtgagcgaattgaagttgca | vvi-miR167b *-10_perfect match<br>probe                                    |
| vvi miR-1269 nat as  | acatgatctagtctttcctg  | vvi-miR167b *-10_mismatch probe                                            |
| vvi miR-1269 2mut as | acataatctagcctttcctg  | vvi-miR167b *0_perfect match probe                                         |
| vvi miR-1270 nat as  | tgaaactgccacatgatcta  | vvi-miR167b *0_mismatch probe                                              |
| vvi miR-1270 2mut as | tgaaactgtcccatgatcta  | vvi-miR167b *+10_perfect match<br>probe                                    |
| vvi miR-1271 nat as  | catcaacaggtgaaactgcc  | vvi-miR167b *+10_mismatch probe                                            |
| vvi miR-1271 2mut as | catcaacagccgaaactgcc  | vvi-miR167c *-10_perfect match<br>probe                                    |
| vvi miR-1272 nat as  | cacatgatctgatctttcct  | vvi-miR167c *-10_mismatch probe                                            |
| vvi miR-1272 2mut as | cacatgatccaatctttcct  | vvi-miR167c *+10_perfect match<br>probe                                    |
| vvi miR-1273 nat as  | ccatcaacaggtgaggctac  | vvi-miR167c *+10_mismatch probe                                            |
| vvi miR-1273 2mut as | ccatcaacacgtgagcctac  | vvi-miR167d *-10_perfect match<br>probe                                    |
| vvi miR-1274 nat as  | gcatgacctagctagggtta  | vvi-miR167d *-10_mismatch probe                                            |
| vvi miR-1274 2mut as | gcatgatctagctagtgtta  |                                                                            |

|                      |                       |                                      |
|----------------------|-----------------------|--------------------------------------|
| vvi miR-1275 nat as  | ggctgtcagggcatgaccta  | vvi-miR167d *0_perfect match probe   |
| vvi miR-1275 2mut as | ggctgtcagtcctgaccta   | vvi-miR167d *0_mismatch probe        |
| vvi miR-1276 nat as  | gaaggagtgaggctgtcagg  | vvi-miR167d *+10_perfect match probe |
| vvi miR-1276 2mut as | gaagaagtgagcctgtcagg  | vvi-miR167d *+10_mismatch probe      |
| vvi miR-1277 nat as  | cacatgatctgatctctgtt  | vvi-miR167e *-10_perfect match probe |
| vvi miR-1277 2mut as | cacatgatccaatctctgtt  | vvi-miR167e *-10_mismatch probe      |
| vvi miR-1278 nat as  | gtgaaactgccacatgatct  | vvi-miR167e *0_perfect match probe   |
| vvi miR-1278 2mut as | gtgaaactgtaacatgatct  | vvi-miR167e *0_mismatch probe        |
| vvi miR-1279 nat as  | ccaacaacaggtgaaactgc  | vvi-miR167e *+10_perfect match probe |
| vvi miR-1279 2mut as | ccaacaacacctgaaactgc  | vvi-miR167e *+10_mismatch probe      |
| vvi miR-1280 nat as  | caaggcgggatcggaattcg  | vvi-miR168 *-10_perfect match probe  |
| vvi miR-1280 2mut as | caaggagggatcagaattcg  | vvi-miR168 *-10_mismatch probe       |
| vvi miR-1281 nat as  | tcagttgatgcaaggcggga  | vvi-miR168 *0_perfect match probe    |
| vvi miR-1281 2mut as | tcagttgatccaaggagggga | vvi-miR168 *0_mismatch probe         |
| vvi miR-1282 nat as  | cgtctccgattcagttgatg  | vvi-miR168 *+10_perfect match probe  |
| vvi miR-1282 2mut as | cgtctcagattccgttgatg  | vvi-miR168 *+10_mismatch probe       |
| vvi miR-1283 nat as  | aacttgccagggtcactat   | vvi-miR169a *-10_perfect match probe |
| vvi miR-1283 2mut as | aactgtcagtggtcactat   | vvi-miR169a *-10_mismatch probe      |
| vvi miR-1284 nat as  | agccaaggacaactgccag   | vvi-miR169a *0_perfect match probe   |
| vvi miR-1284 2mut as | agccaagaacaactcccag   | vvi-miR169a *0_mismatch probe        |
| vvi miR-1285 nat as  | aatcaaatgtagccaaggac  | vvi-miR169a *+10_perfect match probe |
| vvi miR-1285 2mut as | aatcaaatctagtcaaggac  | vvi-miR169a *+10_mismatch probe      |
| vvi miR-1286 nat as  | gagacttgccataaaccaca  | vvi-miR169y *-10_perfect match probe |
| vvi miR-1286 2mut as | gagacttgtcataaatcaca  | vvi-miR169y *-10_mismatch probe      |
| vvi miR-1287 nat as  | aggtgccaaggagacttgcc  | vvi-miR169y *0_perfect match probe   |
| vvi miR-1287 2mut as | aggtgtcaagaagacttgcc  | vvi-miR169y *0_mismatch probe        |

|                      |                       |                                    |
|----------------------|-----------------------|------------------------------------|
| vvi miR-1288 nat as  | gaggccatcaggtgccaag   | vvi-miR169y *+10_perfect match     |
| vvi miR-1288 2mut as | gaggtcatcaggtgtcaag   | probe                              |
| vvi miR-1289 nat as  | tgactaacctgcacgcaca   | vvi-miR169y *+10_mismatch probe    |
| vvi miR-1289 2mut as | tgactaacagtgcaccaca   | vvi-miR169b *-10_perfect match     |
| vvi miR-1290 nat as  | gagccaaggatgactaacgg  | probe                              |
| vvi miR-1290 2mut as | gagcaaaggatgcctaaccg  | vvi-miR169b *-10_mismatch probe    |
| vvi miR-1291 nat as  | agggccaaatgagccaagga  | vvi-miR169b *0_perfect match probe |
| vvi miR-1291 2mut as | aggggtcaaatagtcaagga  | vvi-miR169b *0_mismatch probe      |
| vvi miR-1292 nat as  | aacttgccggattaacgagg  | vvi-miR169b *+10_perfect match     |
| vvi miR-1292 2mut as | aactgtcggattaagagg    | probe                              |
| vvi miR-1293 nat as  | agccaaggacaacttgccgg  | vvi-miR169b *+10_mismatch probe    |
| vvi miR-1293 2mut as | agccaagaacaacttcccgg  | vvi-miR169c *-10_perfect match     |
| vvi miR-1294 nat as  | agcccaatgtagccaaggac  | probe                              |
| vvi miR-1294 2mut as | agcccaaatgtagcaaggac  | vvi-miR169c *-10_mismatch probe    |
| vvi miR-1295 nat as  | aacttgccagggttcaactat | vvi-miR169c *0_perfect match probe |
| vvi miR-1295 2mut as | aactgtcagtggttcaactat | vvi-miR169c *0_mismatch probe      |
| vvi miR-1296 nat as  | agccaaggacaacttgccag  | vvi-miR169c *+10_perfect match     |
| vvi miR-1296 2mut as | agccaagaacaacttcccag  | probe                              |
| vvi miR-1297 nat as  | aatcaaatgtagccaaggac  | vvi-miR169c *+10_mismatch probe    |
| vvi miR-1297 2mut as | aatcaaatctagcaaggac   | vvi-miR169d *-10_perfect match     |
| vvi miR-1298 nat as  | tgactgcctggaacccaaac  | probe                              |
| vvi miR-1298 2mut as | tgactgtctggaactcaaac  | vvi-miR169d *-10_mismatch probe    |
| vvi miR-1299 nat as  | ttagccaagggtgactgcctg | vvi-miR169d *0_perfect match probe |
| vvi miR-1299 2mut as | ttagtcaagggtgactccctg | vvi-miR169d *0_mismatch probe      |
| vvi miR-1300 nat as  | gcctgtaaaattagccaagg  | vvi-miR169d *+10_perfect match     |
|                      |                       | probe                              |

|                      |                        |                                                                            |
|----------------------|------------------------|----------------------------------------------------------------------------|
| vvi miR-1300 2mut as | gcctctaaaattagtagcaagg | vvi-miR169e *+10_mismatch probe<br>vvi-miR169f *-10_perfect match<br>probe |
| vvi miR-1301 nat as  | acaacttgcccattattgat   | vvi-miR169f *-10_mismatch probe                                            |
| vvi miR-1301 2mut as | acaacttgcaattattgat    | vvi-miR169f *0_perfect match probe                                         |
| vvi miR-1302 nat as  | gtagccaaacacaacttgcc   | vvi-miR169f *0_mismatch probe                                              |
| vvi miR-1302 2mut as | gtagtcaaaccacaacttgcc  | vvi-miR169f *+10_perfect match<br>probe                                    |
| vvi miR-1303 nat as  | agataaacatgtagccaaac   | vvi-miR169f *+10_mismatch probe                                            |
| vvi miR-1303 2mut as | agataaaaatgtagtcaaac   | vvi-miR169g *-10_perfect match<br>probe                                    |
| vvi miR-1304 nat as  | acaacttgccggcttcatca   | vvi-miR169g *-10_mismatch probe                                            |
| vvi miR-1304 2mut as | acaactgtgccttcatca     | vvi-miR169g *0_perfect match probe                                         |
| vvi miR-1305 nat as  | gtagccaaagacaacttgcc   | vvi-miR169g *0_mismatch probe                                              |
| vvi miR-1305 2mut as | gtagtcaaagaaaacttgcc   | vvi-miR169g *+10_perfect match<br>probe                                    |
| vvi miR-1306 nat as  | aaagaagcatgtagccaaag   | vvi-miR169g *+10_mismatch probe                                            |
| vvi miR-1306 2mut as | aaagaagaatgtagtcaaag   | vvi-miR169h *-10_perfect match<br>probe                                    |
| vvi miR-1307 nat as  | taaccctccgtgctgacca    | vvi-miR169h *-10_mismatch probe                                            |
| vvi miR-1307 2mut as | taaccctcagtgagtgacca   | vvi-miR169h *0_perfect match probe                                         |
| vvi miR-1308 nat as  | gagtcaaggataaccctccg   | vvi-miR169h *0_mismatch probe                                              |
| vvi miR-1308 2mut as | gagtcaagaataactctccg   | vvi-miR169h *+10_perfect match<br>probe                                    |
| vvi miR-1309 nat as  | ggagctaaaggagtcaagga   | vvi-miR169h *+10_mismatch probe                                            |
| vvi miR-1309 2mut as | ggagttaaagaagtcaagga   | vvi-miR169i *-10_perfect match<br>probe                                    |
| vvi miR-1310 nat as  | aaccagccgtgcatgaccag   | vvi-miR169i *-10_mismatch probe                                            |
| vvi miR-1310 2mut as | aaccagtcgtgaatgaccag   | vvi-miR169i *0_perfect match probe                                         |
| vvi miR-1311 nat as  | agacagggataaccagccgt   | vvi-miR169i *0_mismatch probe                                              |
| vvi miR-1311 2mut as | agacagtgataaccacccgt   | vvi-miR169i *+10_perfect match<br>probe                                    |
| vvi miR-1312 nat as  | gagctaaaggagacagggat   | vvi-miR169i *+10_mismatch probe                                            |
| vvi miR-1312 2mut as | gagctaaagaagacacggat   | vvi-miR169j *-10_perfect match                                             |
| vvi miR-1313 nat as  | aacctgccagggacacatg    |                                                                            |

|                      |                       |                                    |
|----------------------|-----------------------|------------------------------------|
| vvi miR-1313 2mut as | aacctgtcagtgacaccatg  | probe                              |
| vvi miR-1314 nat as  | agccaaggacaacctgccag  | vvi-miR169j *-10_mismatch probe    |
| vvi miR-1314 2mut as | agccaagaacaacctcccag  | vvi-miR169j *0_perfect match probe |
|                      |                       | vvi-miR169j *0_mismatch probe      |
|                      |                       | vvi-miR169j *+10_perfect match     |
| vvi miR-1315 nat as  | agcgaaaggtagccaaggac  | probe                              |
| vvi miR-1315 2mut as | agcgaaagctagtcaaggac  | vvi-miR169j *+10_mismatch probe    |
|                      |                       | vvi-miR169k *-10_perfect match     |
|                      |                       | probe                              |
| vvi miR-1316 nat as  | aacctgccagggacaccatg  | vvi-miR169k *-10_mismatch probe    |
| vvi miR-1316 2mut as | aacctgtcagtgacaccatg  | vvi-miR169k *0_perfect match probe |
| vvi miR-1317 nat as  | agccaaggacaacctgccag  | vvi-miR169k *0_mismatch probe      |
| vvi miR-1317 2mut as | agccaagaacaacctcccag  | vvi-miR169k *+10_perfect match     |
|                      |                       | probe                              |
| vvi miR-1318 nat as  | aacgaaaggtagccaaggac  | vvi-miR169k *+10_mismatch probe    |
| vvi miR-1318 2mut as | aacgaaagctagtcaaggac  | vvi-miR169l *-10_perfect match     |
|                      |                       | probe                              |
| vvi miR-1319 nat as  | aactagccgtgcatgccag   | vvi-miR169l *-10_mismatch probe    |
| vvi miR-1319 2mut as | aactagtctgcatgtccag   | vvi-miR169l *0_perfect match probe |
| vvi miR-1320 nat as  | agccaagaataactagccgt  | vvi-miR169l *0_mismatch probe      |
| vvi miR-1320 2mut as | agccaacaataactaccgt   | vvi-miR169l *+10_perfect match     |
|                      |                       | probe                              |
| vvi miR-1321 nat as  | gggccaaatgagccaagaat  | vvi-miR169l *+10_mismatch probe    |
| vvi miR-1321 2mut as | gggc aaaatgagtcaagaat | vvi-miR169m *-10_perfect match     |
|                      |                       | probe                              |
| vvi miR-1322 nat as  | tgcttgccagttatggccag  | vvi-miR169m *-10_mismatch probe    |
| vvi miR-1322 2mut as | tgcttgctcagttatgccag  | vvi-miR169m *0_perfect match       |
|                      |                       | probe                              |
| vvi miR-1323 nat as  | gagcctcggatgcttgccag  | vvi-miR169m *0_mismatch probe      |
| vvi miR-1323 2mut as | gagcctcagatgcttcccag  | vvi-miR169m *+10_perfect match     |
|                      |                       | probe                              |
| vvi miR-1324 nat as  | gggtgaaacagagcctcgga  | vvi-miR169m *+10_mismatch probe    |
| vvi miR-1324 2mut as | gggtgaaaaagagtctcgga  | vvi-miR169n *-10_perfect match     |
|                      |                       | probe                              |
| vvi miR-1325 nat as  | gccagttatgaccagttaaa  |                                    |

|                      |                       |                                      |
|----------------------|-----------------------|--------------------------------------|
| vvi miR-1325 2mut as | gccagttataacaagttaa   | vvi-miR169n *-10_mismatch probe      |
| vvi miR-1326 nat as  | tcagatgctgccagttatg   | vvi-miR169n *0_perfect match probe   |
| vvi miR-1326 2mut as | tcagatcctgtcagttatg   | vvi-miR169n *0_mismatch probe        |
|                      |                       | vvi-miR169n *+10_perfect match probe |
| vvi miR-1327 nat as  | aaatagagcctcagatgctt  | vvi-miR169n *+10_mismatch probe      |
| vvi miR-1327 2mut as | aaatagagtctccagatgctt | vvi-miR169o *-10_perfect match probe |
|                      |                       | vvi-miR169o *-10_mismatch probe      |
| vvi miR-1328 nat as  | actcgtgtccatgcccagt   | vvi-miR169o *0_perfect match probe   |
| vvi miR-1328 2mut as | actccctgtccatgtccagt  | vvi-miR169o *0_mismatch probe        |
| vvi miR-1329 nat as  | gccaagaataactcgtgtc   | vvi-miR169o *+10_perfect match probe |
| vvi miR-1329 2mut as | gccaacaataactccctgtc  | vvi-miR169o *+10_mismatch probe      |
|                      |                       | vvi-miR169o *-10_perfect match probe |
| vvi miR-1330 nat as  | ggccgcatgagccaagaata  | vvi-miR169p *-10_mismatch probe      |
| vvi miR-1330 2mut as | ggccccatgagtcaagaata  | vvi-miR169p *0_perfect match probe   |
|                      |                       | vvi-miR169p *0_mismatch probe        |
| vvi miR-1331 nat as  | tgcttgccagttatgccag   | vvi-miR169p *+10_perfect match probe |
| vvi miR-1331 2mut as | tgcttgtcagttataccag   | vvi-miR169p *+10_mismatch probe      |
| vvi miR-1332 nat as  | gagcctcggatgcttgccag  | vvi-miR169q *-10_mismatch probe      |
| vvi miR-1332 2mut as | gagcctcagatgcttcccag  | vvi-miR169q *0_perfect match probe   |
|                      |                       | vvi-miR169q *0_mismatch probe        |
| vvi miR-1333 nat as  | gggtgaaacagagcctcgga  | vvi-miR169q *+10_perfect match probe |
| vvi miR-1333 2mut as | gggtgaaaaagagtctcgga  | vvi-miR169q *+10_mismatch probe      |
|                      |                       | vvi-miR169q *-10_perfect match probe |
| vvi miR-1334 nat as  | tacatgccggctgttccagt  | vvi-miR169q *-10_mismatch probe      |
| vvi miR-1334 2mut as | tacatgccgctgttccagt   | vvi-miR169q *0_perfect match probe   |
| vvi miR-1335 nat as  | gagccaggattacatgccgg  | vvi-miR169q *0_mismatch probe        |
| vvi miR-1335 2mut as | gagcaaggattacatcccgg  | vvi-miR169q *+10_perfect match probe |
|                      |                       | vvi-miR169q *+10_mismatch probe      |
| vvi miR-1336 nat as  | ggaccaaatagagccaggat  | vvi-miR169r *-10_perfect match probe |
| vvi miR-1336 2mut as | ggacaaaatagagtccaggat | vvi-miR169r *-10_mismatch probe      |
|                      |                       | vvi-miR169r *0_perfect match probe   |
| vvi miR-1337 nat as  | caactgcccgttacacata   | vvi-miR169r *-10_mismatch probe      |
| vvi miR-1337 2mut as | caactgtcgttacacata    | vvi-miR169r *0_perfect match probe   |
| vvi miR-1338 nat as  | tgagtcaagtcaactgccg   |                                      |

|                      |                      |                                      |
|----------------------|----------------------|--------------------------------------|
| vvi miR-1338 2mut as | tgagtcaagcaaacttgccg | vvi-miR169r *0_mismatch probe        |
| vvi miR-1339 nat as  | agggccaaactgagtcaagt | vvi-miR169r *+10_perfect match probe |
| vvi miR-1339 2mut as | agggtcaaactgagccaagt | vvi-miR169r *+10_mismatch probe      |
| vvi miR-1340 nat as  | aacttgccgggaagatgatc | vvi-miR169s *-10_perfect match probe |
| vvi miR-1340 2mut as | aactgtcggaaagatgatc  | vvi-miR169s *-10_mismatch probe      |
| vvi miR-1341 nat as  | agccaggaacaacttgccgg | vvi-miR169s *0_perfect match probe   |
| vvi miR-1341 2mut as | agccagaacaacttcccgg  | vvi-miR169s *0_mismatch probe        |
| vvi miR-1342 nat as  | agcagaatgtagccaggaac | vvi-miR169s *+10_perfect match probe |
| vvi miR-1342 2mut as | agcagaatctagtcaggaac | vvi-miR169s *+10_mismatch probe      |
| vvi miR-1343 nat as  | caactgcccgttacacata  | vvi-miR169t *-10_perfect match probe |
| vvi miR-1343 2mut as | caactgtcgttacacata   | vvi-miR169t *-10_mismatch probe      |
| vvi miR-1344 nat as  | tgagtcaagtcaacttgccg | vvi-miR169t *0_perfect match probe   |
| vvi miR-1344 2mut as | tgagtcaagcaaacttgccg | vvi-miR169t *0_mismatch probe        |
| vvi miR-1345 nat as  | agggccaaactgagtcaagt | vvi-miR169t *+10_perfect match probe |
| vvi miR-1345 2mut as | agggtcaaactgagccaagt | vvi-miR169t *+10_mismatch probe      |
| vvi miR-1346 nat as  | caactgcccgtaaacacata | vvi-miR169u *-10_perfect match probe |
| vvi miR-1346 2mut as | caactgtcgctaaacacata | vvi-miR169u *-10_mismatch probe      |
| vvi miR-1347 nat as  | agagtcaagtcaacttgccg | vvi-miR169u *0_perfect match probe   |
| vvi miR-1347 2mut as | agagtcaagcaaacttgccg | vvi-miR169u *0_mismatch probe        |
| vvi miR-1348 nat as  | agggccaaacagagtcaagt | vvi-miR169u *+10_perfect match probe |
| vvi miR-1348 2mut as | agggtcaaacagagccaagt | vvi-miR169u *+10_mismatch probe      |
| vvi miR-1349 nat as  | aaattgccgatccatggaca | vvi-miR169v *-10_perfect match probe |
| vvi miR-1349 2mut as | aaattgtcgatccatcgaca | vvi-miR169v *-10_mismatch probe      |
| vvi miR-1350 nat as  | gccaagaaataaattgccga | vvi-miR169v *0_perfect match probe   |
| vvi miR-1350 2mut as | gccaacaaataaattcccga | vvi-miR169v *0_mismatch probe        |
| vvi miR-1351 nat as  | gccaacatagccaagaagt  | vvi-miR169v *+10_perfect match probe |

|                      |                       |                                                                            |
|----------------------|-----------------------|----------------------------------------------------------------------------|
| vvi miR-1351 2mut as | gcccaaatagtcagaagaat  | probe<br>vvi-miR169v *+10_mismatch probe<br>vvi-miR169w *-10_perfect match |
| vvi miR-1352 nat as  | gactcgccgaccaccatfff  | probe                                                                      |
| vvi miR-1352 2mut as | gactccccgaccacaatfff  | vvi-miR169w *-10_mismatch probe                                            |
| vvi miR-1353 nat as  | agctaagaatgactcgccga  | vvi-miR169w *0_perfect match probe                                         |
| vvi miR-1353 2mut as | agctaacaatgactccccga  | vvi-miR169w *0_mismatch probe<br>vvi-miR169w *+10_perfect match            |
| vvi miR-1354 nat as  | gcagaaatgtagctaagaat  | probe                                                                      |
| vvi miR-1354 2mut as | gcagaaatctagttaagaat  | vvi-miR169w *+10_mismatch probe<br>vvi-miR169x *-10_perfect match          |
| vvi miR-1355 nat as  | tgactgcctaagaccacgg   | probe                                                                      |
| vvi miR-1355 2mut as | tgactgtctaagacaacgg   | vvi-miR169x *-10_mismatch probe                                            |
| vvi miR-1356 nat as  | gccgaaggaatgactgccta  | vvi-miR169x *0_perfect match probe                                         |
| vvi miR-1356 2mut as | gccgaagaaatgactcccta  | vvi-miR169x *0_mismatch probe<br>vvi-miR169x *+10_perfect match            |
| vvi miR-1357 nat as  | ggtcagtttagccgaaggaa  | probe                                                                      |
| vvi miR-1357 2mut as | ggtcaggtttagtcgaaggaa | vvi-miR169x *+10_mismatch probe<br>vvi-miR171a *-10_perfect match          |
| vvi miR-1358 nat as  | caatatcatgttcaatac    | probe                                                                      |
| vvi miR-1358 2mut as | caatataatcttcaatac    | vvi-miR171a *-10_mismatch probe                                            |
| vvi miR-1359 nat as  | tgagccgtgccaatatcatg  | vvi-miR171a *0_perfect match probe                                         |
| vvi miR-1359 2mut as | tgagccgtgtaaataatcatg | vvi-miR171a *0_mismatch probe<br>vvi-miR171a *+10_perfect match            |
| vvi miR-1360 nat as  | ttaatctgattgagccgtgc  | probe                                                                      |
| vvi miR-1360 2mut as | ttaatccgattgagtcgtgc  | vvi-miR171a *+10_mismatch probe<br>vvi-miR171b *-10_perfect match          |
| vvi miR-1361 nat as  | cgccaataacctccccca    | probe                                                                      |
| vvi miR-1361 2mut as | cgccaatatctctccca     | vvi-miR171b *-10_mismatch probe                                            |
| vvi miR-1362 nat as  | aattgaggcacgccaatacc  | vvi-miR171b *0_perfect match probe                                         |
| vvi miR-1362 2mut as | aattgagccacccaatacc   | vvi-miR171b *0_mismatch probe<br>vvi-miR171b *+10_perfect match            |
| vvi miR-1363 nat as  | catgtctttaaattgaggca  | probe                                                                      |
| vvi miR-1363 2mut as | catgcctttaaattaaggca  | vvi-miR171b *+10_mismatch probe                                            |

|                      |                      |                                      |
|----------------------|----------------------|--------------------------------------|
| vvi miR-1364 nat as  | caatateccgtaatacca   | vvi-miR171c *-10_perfect match probe |
| vvi miR-1364 2mut as | caatateccactaatacca  | vvi-miR171c *-10_mismatch probe      |
| vvi miR-1365 nat as  | tgaaccgcaccaatateccg | vvi-miR171c *0_perfect match probe   |
| vvi miR-1365 2mut as | tgaaccccacaaatateccg | vvi-miR171c *0_mismatch probe        |
|                      |                      | vvi-miR171c *+10_perfect match probe |
| vvi miR-1366 nat as  | gctttcttattgaaccgcac | vvi-miR171c *+10_mismatch probe      |
| vvi miR-1366 2mut as | gcttttttattgaacgcac  | vvi-miR171d *-10_perfect match probe |
|                      |                      | vvi-miR171d *-10_mismatch probe      |
| vvi miR-1367 nat as  | caatatctcgtgtatcta   | vvi-miR171d *0_perfect match probe   |
| vvi miR-1367 2mut as | caatatctactgtatcta   | vvi-miR171d *0_mismatch probe        |
| vvi miR-1368 nat as  | tgaaccgtatcaatatctcg | vvi-miR171d *+10_perfect match probe |
| vvi miR-1368 2mut as | tgaacagtataaatatctcg | vvi-miR171d *+10_mismatch probe      |
|                      |                      | vvi-miR171e *-10_perfect match probe |
| vvi miR-1369 nat as  | gctttctaattgaaccgat  | vvi-miR171e *-10_mismatch probe      |
| vvi miR-1369 2mut as | gctttttaattgaacgat   | vvi-miR171e *0_perfect match probe   |
|                      |                      | vvi-miR171e *0_mismatch probe        |
| vvi miR-1370 nat as  | caccaacategcttacttcc | vvi-miR171e *+10_perfect match probe |
| vvi miR-1370 2mut as | caccaacataccttacttcc | vvi-miR171e *+10_mismatch probe      |
| vvi miR-1371 nat as  | gattgaacctcaccaacatc | vvi-miR171f *-10_perfect match probe |
| vvi miR-1371 2mut as | gattgaatctcacaacatc  | vvi-miR171f *-10_mismatch probe      |
|                      |                      | vvi-miR171f *0_perfect match probe   |
| vvi miR-1372 nat as  | tccgtcttcggattgaacct | vvi-miR171f *0_mismatch probe        |
| vvi miR-1372 2mut as | tccgtcttcaaattgaacct | vvi-miR171f *+10_perfect match probe |
|                      |                      | vvi-miR171f *+10_mismatch probe      |
| vvi miR-1373 nat as  | caacategctttcttcaa   | vvi-miR171f *-10_perfect match probe |
| vvi miR-1373 2mut as | caacatecccttttcaa    | vvi-miR171f *-10_mismatch probe      |
| vvi miR-1374 nat as  | tgaacctcaccaacategct | vvi-miR171f *0_perfect match probe   |
| vvi miR-1374 2mut as | tgaacctcataaacategct | vvi-miR171f *0_mismatch probe        |
|                      |                      | vvi-miR171f *+10_perfect match probe |
| vvi miR-1375 nat as  | atcttcagattgaacctcac | vvi-miR171f *+10_mismatch probe      |
| vvi miR-1375 2mut as | atcttccgattgaatctcac | vvi-miR171g *-10_perfect match probe |
|                      |                      | vvi-miR171g *-10_mismatch probe      |
| vvi miR-1376 nat as  | gaaccaacatggagaggctg |                                      |

|                      |                      |                                      |
|----------------------|----------------------|--------------------------------------|
| vvi miR-1376 2mut as | gaacaaacatcgagaggctg | vvi-miR171g *-10_mismatch probe      |
| vvi miR-1377 nat as  | cccaccgatggaaccaacat | vvi-miR171g *0_perfect match probe   |
| vvi miR-1377 2mut as | cccacagatggaacaaacat | vvi-miR171g *0_mismatch probe        |
| vvi miR-1378 nat as  | gttggtgtccccaccgatg  | vvi-miR171g *+10_perfect match probe |
| vvi miR-1378 2mut as | gttggtgtctcccacagatg | vvi-miR171g *+10_mismatch probe      |
| vvi miR-1379 nat as  | caccaacatctcgtgaaa   | vvi-miR171h *-10_perfect match probe |
| vvi miR-1379 2mut as | caccaaactctcctgaaa   | vvi-miR171h *-10_mismatch probe      |
| vvi miR-1380 nat as  | ggttgaaccgcaccaacatc | vvi-miR171h *0_perfect match probe   |
| vvi miR-1380 2mut as | ggttgaaccaaccaacatc  | vvi-miR171h *0_mismatch probe        |
| vvi miR-1381 nat as  | actacagttaggttgaaccg | vvi-miR171h *+10_perfect match probe |
| vvi miR-1381 2mut as | actaaagttagcttgaaccg | vvi-miR171h *+10_mismatch probe      |
| vvi miR-1382 nat as  | caacatccccaccttcttc  | vvi-miR171i *-10_perfect match probe |
| vvi miR-1382 2mut as | caacatcctcatcttcttc  | vvi-miR171i *-10_mismatch probe      |
| vvi miR-1383 nat as  | tgagccattccaacatcccc | vvi-miR171i *0_perfect match probe   |
| vvi miR-1383 2mut as | tgagtcattcaaacatcccc | vvi-miR171i *0_mismatch probe        |
| vvi miR-1384 nat as  | ttgatttgattgagccatc  | vvi-miR171i *+10_perfect match probe |
| vvi miR-1384 2mut as | ttgatttaattgagtcattc | vvi-miR171i *+10_mismatch probe      |
| vvi miR-1385 nat as  | gatgctgcatcggaata    | vvi-miR172a *-10_perfect match probe |
| vvi miR-1385 2mut as | gatgctgaatcggaata    | vvi-miR172a *-10_mismatch probe      |
| vvi miR-1386 nat as  | gaatcttgatgatgctgcat | vvi-miR172a *0_perfect match probe   |
| vvi miR-1386 2mut as | gaatcttaatgatcctgcat | vvi-miR172a *0_mismatch probe        |
| vvi miR-1387 nat as  | tcaaggatgagaatcttgat | vvi-miR172a *+10_perfect match probe |
| vvi miR-1387 2mut as | tcaagaatgagaatcttgat | vvi-miR172a *+10_mismatch probe      |
| vvi miR-1388 nat as  | tgatgctgcatcggaata   | vvi-miR172b *-10_perfect match probe |
| vvi miR-1388 2mut as | tgatgctgaatcggaata   | vvi-miR172b *-10_mismatch probe      |
| vvi miR-1389 nat as  | agaatcttgatgatgctgca | vvi-miR172b *0_perfect match probe   |

|                                                                                                                       |                                                                                                                     |                                                                                                                                                   |
|-----------------------------------------------------------------------------------------------------------------------|---------------------------------------------------------------------------------------------------------------------|---------------------------------------------------------------------------------------------------------------------------------------------------|
| vvi miR-1389 2mut as                                                                                                  | agaatcttaatgatcctgca                                                                                                | vvi-miR172b *0_mismatch probe<br>vvi-miR172b *+10_perfect match<br>probe                                                                          |
| vvi miR-1390 nat as <br>vvi miR-1390 2mut as                                                                          | ttgggggtgagaatcttga<br>ttgggtgtgcgaatcttga                                                                          | vvi-miR172b *+10_mismatch probe<br>vvi-miR172c *-10_perfect match<br>probe                                                                        |
| vvi miR-1391 nat as <br>vvi miR-1391 2mut as <br>vvi miR-1392 nat as <br>vvi miR-1392 2mut as                         | tgatgctccatccgcaaac<br>tgatcctccatcccaaac<br>tgaatcttgatgatgctcca<br>tgaatcttaatgatcctcca                           | vvi-miR172c *-10_mismatch probe<br>vvi-miR172c *0_perfect match probe<br>vvi-miR172c *0_mismatch probe<br>vvi-miR172c *+10_perfect match<br>probe |
| vvi miR-1393 nat as <br>vvi miR-1393 2mut as                                                                          | tcaatacttgtaatcttga<br>tcaatactccgaatcttga                                                                          | vvi-miR172c *+10_mismatch probe<br>vvi-miR172d *-10_perfect match<br>probe                                                                        |
| vvi miR-1394 nat as <br>vvi miR-1394 2mut as <br>vvi miR-1395 nat as <br>vvi miR-1395 2mut as                         | gatgctgcatcagctaac<br>gatgctgaatcagttaac<br>gaatcttgatgatgctgcat<br>gaatcttaatgatcctgcat                            | vvi-miR172d *-10_mismatch probe<br>vvi-miR172d *0_perfect match probe<br>vvi-miR172d *0_mismatch probe<br>vvi-miR172d *+10_perfect match<br>probe |
| vvi miR-1396 nat as <br>vvi miR-1396 2mut as                                                                          | cattgggtgtgaatcttgat<br>cattgtgtgtaaacttgat                                                                         | vvi-miR172d *+10_mismatch probe<br>vvi-miR319b *-10_perfect match<br>probe                                                                        |
| vvi miR-1397 nat as <br>vvi miR-1397 2mut as <br>vvi miR-1398 nat as <br>vvi miR-1398 2mut as                         | agagagctccttctccaca<br>agagagttccttctccaca<br>actggactaaagagagctcc<br>actgaactaaagagacctcc                          | vvi-miR319b *-10_mismatch probe<br>vvi-miR319b *0_perfect match probe<br>vvi-miR319b *0_mismatch probe<br>vvi-miR319b *+10_perfect match<br>probe |
| vvi miR-1399 nat as <br>vvi miR-1399 2mut as                                                                          | gctgtctcggactggactaa<br>gctgtctcagactcgactaa                                                                        | vvi-miR319b *+10_mismatch probe<br>vvi-miR319c *-10_perfect match<br>probe                                                                        |
| vvi miR-1400 nat as <br>vvi miR-1400 2mut as <br>vvi miR-1401 nat as <br>vvi miR-1401 2mut as <br>vvi miR-1402 nat as | gaaagctctcttcaatgtaa<br>gaaagttctcttaaatgtaa<br>gtggactgaagaaagctctc<br>gtggcctgaagaaagtctc<br>ccacccatgagtgactgtaa | vvi-miR319c *-10_mismatch probe<br>vvi-miR319c *0_perfect match probe<br>vvi-miR319c *0_mismatch probe<br>vvi-miR319c *+10_perfect match<br>probe |

|                      |                       |                                                                                     |
|----------------------|-----------------------|-------------------------------------------------------------------------------------|
| vvi miR-1402 2mut as | ccactcatgagtcgactgaa  | probe<br>vvi-miR319c *+10_mismatch probe<br>vvi-miR319e *-10_perfect match<br>probe |
| vvi miR-1403 nat as  | aggaacccccatttctgca   |                                                                                     |
| vvi miR-1403 2mut as | aggaaccctcatttttgca   | vvi-miR319e *-10_mismatch probe                                                     |
| vvi miR-1404 nat as  | tgggctgcaaaggaaccccc  | vvi-miR319e *0_perfect match probe                                                  |
| vvi miR-1404 2mut as | tgggctgaaaaggaatcccc  | vvi-miR319e *0_mismatch probe<br>vvi-miR319e *+10_perfect match<br>probe            |
| vvi miR-1405 nat as  | ggagttgttttgggctgcaa  | vvi-miR319e *+10_mismatch probe                                                     |
| vvi miR-1405 2mut as | ggagttcttttggcctgcaa  | vvi-miR319f *-10_perfect match<br>probe                                             |
| vvi miR-1406 nat as  | ggaagctctcttaaaccact  | vvi-miR319f *-10_mismatch probe                                                     |
| vvi miR-1406 2mut as | ggaagttctcttaaact     | vvi-miR319f *0_perfect match probe                                                  |
| vvi miR-1407 nat as  | gtggactgaaggaagctctc  | vvi-miR319f *0_mismatch probe                                                       |
| vvi miR-1407 2mut as | gtggcctgaaggaagtctc   | vvi-miR319f *+10_perfect match<br>probe                                             |
| vvi miR-1408 nat as  | ccatccatgagtgactgaa   | vvi-miR319f *+10_mismatch probe                                                     |
| vvi miR-1408 2mut as | ccatcaatgagtcgactgaa  | vvi-miR319g *-10_perfect match<br>probe                                             |
| vvi miR-1409 nat as  | aaaggagctcttcagctgtt  | vvi-miR319g *-10_mismatch probe                                                     |
| vvi miR-1409 2mut as | aaaggagtctcttcagttgtt | vvi-miR319g *0_perfect match probe                                                  |
| vvi miR-1410 nat as  | tattggactaaaaggagctc  | vvi-miR319g *0_mismatch probe                                                       |
| vvi miR-1410 2mut as | tattcgactaaaagaagctc  | vvi-miR319g *+10_perfect match<br>probe                                             |
| vvi miR-1411 nat as  | cagccctctttattggacta  | vvi-miR319g *+10_mismatch probe                                                     |
| vvi miR-1411 2mut as | cagctctctttattcgacta  | vvi-miR390 *-10_perfect match<br>probe                                              |
| vvi miR-1412 nat as  | agatagcgccacacacacaaa | vvi-miR390 *-10_mismatch probe                                                      |
| vvi miR-1412 2mut as | agatagccccacaccacaaa  | vvi-miR390 *0_perfect match probe                                                   |
| vvi miR-1413 nat as  | aactcaggatagatagcgcc  | vvi-miR390 *0_mismatch probe                                                        |
| vvi miR-1413 2mut as | aactcagaatagataccgcc  | vvi-miR390 *+10_perfect match<br>probe                                              |
| vvi miR-1414 nat as  | gaaccggtgaaactcaggat  | vvi-miR390 *+10_mismatch probe                                                      |
| vvi miR-1414 2mut as | gaaccagtgaaactccggt   |                                                                                     |

|                      |                      |                                      |
|----------------------|----------------------|--------------------------------------|
| vvi miR-1415 nat as  | agcatgatccaatgggaaaa | vvi-miR393a *-10_perfect match probe |
| vvi miR-1415 2mut as | agcatgatcaaatgtgaaaa | vvi-miR393a *-10_mismatch probe      |
| vvi miR-1416 nat as  | cctaagggatagcatgatcc | vvi-miR393a *0_perfect match probe   |
| vvi miR-1416 2mut as | cctaagtgatagaatgatcc | vvi-miR393a *0_mismatch probe        |
| vvi miR-1417 nat as  | atggagagttcctaagggat | vvi-miR393a *+10_perfect match probe |
| vvi miR-1417 2mut as | atggagactttctaagggat | vvi-miR393a *+10_mismatch probe      |
| vvi miR-1418 nat as  | agcatgatccaaagacatgg | vvi-miR393b *-10_perfect match probe |
| vvi miR-1418 2mut as | agcatgatcaaaagaaatgg | vvi-miR393b *-10_mismatch probe      |
| vvi miR-1419 nat as  | ccaaagggatagcatgatcc | vvi-miR393b *0_perfect match probe   |
| vvi miR-1419 2mut as | ccaaagtgatagaatgatcc | vvi-miR393b *0_mismatch probe        |
| vvi miR-1420 nat as  | aaggaggaatccaaagggat | vvi-miR393b *+10_perfect match probe |
| vvi miR-1420 2mut as | aaggagaaatccaaagggat | vvi-miR393b *+10_mismatch probe      |
| vvi miR-1421 nat as  | ggccacctccaaaagaatat | vvi-miR394a *-10_perfect match probe |
| vvi miR-1421 2mut as | ggccacctcaaaaacaatat | vvi-miR394a *-10_mismatch probe      |
| vvi miR-1422 nat as  | cagagccactttggcatgct | vvi-miR394a *+10_perfect match probe |
| vvi miR-1422 2mut as | cagagtcactttgccatgct | vvi-miR394a *+10_mismatch probe      |
| vvi miR-1423 nat as  | gcccacctccacagagagaa | vvi-miR394b *-10_perfect match probe |
| vvi miR-1423 2mut as | gcccacctcaccagagagaa | vvi-miR394b *-10_mismatch probe      |
| vvi miR-1424 nat as  | cagagcttggtggcagtat  | vvi-miR394b *+10_perfect match probe |
| vvi miR-1424 2mut as | cagagtttggtgccagtat  | vvi-miR394b *+10_mismatch probe      |
| vvi miR-1425 nat as  | ggccgcctccaaacgcttgt | vvi-miR394c *-10_perfect match probe |
| vvi miR-1425 2mut as | ggccccctccaaaccttgt  | vvi-miR394c *-10_mismatch probe      |
| vvi miR-1426 nat as  | cagagccaatttggcatcct | vvi-miR394c *+10_perfect match probe |
| vvi miR-1426 2mut as | cagagtcaatttggcatcct | vvi-miR394c *+10_mismatch probe      |

|                      |                      |                                      |
|----------------------|----------------------|--------------------------------------|
| vvi miR-1427 nat as  | aagggaactctaggggac   | vvi-miR395a *-10_perfect match probe |
| vvi miR-1427 2mut as | aaggaaactctagtggac   | vvi-miR395a *-10_mismatch probe      |
| vvi miR-1428 nat as  | tgaagtgatcaagggaacte | vvi-miR395a *0_perfect match probe   |
| vvi miR-1428 2mut as | tgaagcgatcaagtgaacte | vvi-miR395a *0_mismatch probe        |
|                      |                      | vvi-miR395a *+10_perfect match probe |
| vvi miR-1429 nat as  | agctccctagtgaagtgatc | vvi-miR395a *+10_mismatch probe      |
| vvi miR-1429 2mut as | agctctctagtgaagcgatc | vvi-miR395b *-10_perfect match probe |
|                      |                      | vvi-miR395b *-10_mismatch probe      |
| vvi miR-1430 nat as  | aggggaactctaggggac   | vvi-miR395b *0_perfect match probe   |
| vvi miR-1430 2mut as | agggaaactctagtggac   | vvi-miR395b *0_mismatch probe        |
| vvi miR-1431 nat as  | tgaagtggtaaggggaacte | vvi-miR395b *+10_perfect match probe |
| vvi miR-1431 2mut as | tgaagtcgtaaggtgaacte | vvi-miR395b *+10_mismatch probe      |
|                      |                      | vvi-miR395c *-10_perfect match probe |
| vvi miR-1432 nat as  | agatccccagtgaagtggta | vvi-miR395c *-10_mismatch probe      |
| vvi miR-1432 2mut as | agatcctcagtgaagcggta | vvi-miR395c *0_perfect match probe   |
|                      |                      | vvi-miR395c *0_mismatch probe        |
| vvi miR-1433 nat as  | aagggaactctaggggac   | vvi-miR395c *+10_perfect match probe |
| vvi miR-1433 2mut as | aaggaaactctagtggac   | vvi-miR395c *+10_mismatch probe      |
| vvi miR-1434 nat as  | tgaagtggcgaagggaacte | vvi-miR395d *-10_perfect match probe |
| vvi miR-1434 2mut as | tgaagtcgcaagtgaacte  | vvi-miR395d *-10_mismatch probe      |
|                      |                      | vvi-miR395d *0_perfect match probe   |
| vvi miR-1435 nat as  | aggtccccagtgaagtggtc | vvi-miR395d *0_mismatch probe        |
| vvi miR-1435 2mut as | aggtcctcagtgaagcggtc | vvi-miR395d *+10_perfect match probe |
|                      |                      | vvi-miR395d *+10_mismatch probe      |
| vvi miR-1436 nat as  | aggggaactctagggggc   | vvi-miR395e *-10_perfect match probe |
| vvi miR-1436 2mut as | agggaaactctagtgggc   |                                      |
| vvi miR-1437 nat as  | tgaagtggcaggggaacte  |                                      |
| vvi miR-1437 2mut as | tgaagtcgcaaggtgaacte |                                      |
|                      |                      |                                      |
| vvi miR-1438 nat as  | agatcccaatgaagtggtc  |                                      |
| vvi miR-1438 2mut as | agatcctcaatgaagcggtc |                                      |
|                      |                      |                                      |
| vvi miR-1439 nat as  | aagggaactctaggggag   |                                      |

|                      |                       |                                      |
|----------------------|-----------------------|--------------------------------------|
| vvi miR-1439 2mut as | aaggaaactctagtgag     | vvi-miR395e *-10_mismatch probe      |
| vvi miR-1440 nat as  | tgaagtggcaagggaact    | vvi-miR395e *0_perfect match probe   |
| vvi miR-1440 2mut as | tgaagtcgtcaagtgaact   | vvi-miR395e *0_mismatch probe        |
|                      |                       | vvi-miR395e *+10_perfect match probe |
| vvi miR-1441 nat as  | aggtccccagtggaagggtc  | vvi-miR395e *+10_mismatch probe      |
| vvi miR-1441 2mut as | aggtcctcagtggaagcggtc | vvi-miR395f *-10_perfect match probe |
|                      |                       | vvi-miR395f *-10_mismatch probe      |
| vvi miR-1442 nat as  | aggggaactctaggggtac   | vvi-miR395f *0_perfect match probe   |
| vvi miR-1442 2mut as | agggaaactctagtgac     | vvi-miR395f *0_mismatch probe        |
| vvi miR-1443 nat as  | tgaagtggcaggggaact    | vvi-miR395f *+10_perfect match probe |
| vvi miR-1443 2mut as | tgaagtcgtcagtggaact   | vvi-miR395f *+10_mismatch probe      |
|                      |                       | vvi-miR395f *+10_perfect match probe |
| vvi miR-1444 nat as  | agatccccagtggaagggtc  | vvi-miR395g *-10_mismatch probe      |
| vvi miR-1444 2mut as | agatcctcagtggaagcggtc | vvi-miR395g *0_perfect match probe   |
|                      |                       | vvi-miR395g *0_mismatch probe        |
| vvi miR-1445 nat as  | aggggaactctaggggac    | vvi-miR395g *+10_perfect match probe |
| vvi miR-1445 2mut as | agggaaactctagtgac     | vvi-miR395g *+10_mismatch probe      |
| vvi miR-1446 nat as  | tgaagtgctcaggggaact   | vvi-miR395h *-10_mismatch probe      |
| vvi miR-1446 2mut as | tgaagtcctcagtggaact   | vvi-miR395h *0_perfect match probe   |
|                      |                       | vvi-miR395h *0_mismatch probe        |
| vvi miR-1447 nat as  | ggatccccaatgaagtgctc  | vvi-miR395h *+10_perfect match probe |
| vvi miR-1447 2mut as | ggatcctcaatgaagcgctc  | vvi-miR395h *+10_mismatch probe      |
|                      |                       | vvi-miR395i *-10_mismatch probe      |
| vvi miR-1448 nat as  | aagggaactctaggggac    | vvi-miR395i *0_perfect match probe   |
| vvi miR-1448 2mut as | aaggaaactctagtgac     | vvi-miR395i *0_mismatch probe        |
| vvi miR-1449 nat as  | tgaagtggcaagggaact    | vvi-miR395i *+10_perfect match probe |
| vvi miR-1449 2mut as | tgaagtcgtcaagtgaact   | vvi-miR395i *+10_mismatch probe      |
|                      |                       | vvi-miR395i *+10_perfect match probe |
| vvi miR-1450 nat as  | aggtccccagtggaagggtc  | vvi-miR395i *-10_mismatch probe      |
| vvi miR-1450 2mut as | aggtcctcagtggaagcggtc | vvi-miR395i *0_perfect match probe   |
|                      |                       | vvi-miR395i *0_mismatch probe        |
| vvi miR-1451 nat as  | aggggaactctagggggc    | vvi-miR395i *-10_mismatch probe      |
| vvi miR-1451 2mut as | agggaaactctagtgac     | vvi-miR395i *0_perfect match probe   |
| vvi miR-1452 nat as  | tgaagtggcaggggaact    |                                      |

|                      |                       |                                                                       |
|----------------------|-----------------------|-----------------------------------------------------------------------|
| vvi miR-1452 2mut as | tgaagtcgctcaggtgaactc | vvi-miR395i *0_mismatch probe<br>vvi-miR395i *+10_perfect match probe |
| vvi miR-1453 nat as  | agatccccagtggaagtgggc | vvi-miR395i *+10_mismatch probe                                       |
| vvi miR-1453 2mut as | agatcctcagtggaagcgggc | vvi-miR395j *-10_perfect match probe                                  |
| vvi miR-1454 nat as  | aggggaactctaggggggc   | vvi-miR395j *-10_mismatch probe                                       |
| vvi miR-1454 2mut as | agggaaactctagtgggc    | vvi-miR395j *0_perfect match probe                                    |
| vvi miR-1455 nat as  | tgaagtggctcaggggaactc | vvi-miR395j *0_mismatch probe                                         |
| vvi miR-1455 2mut as | tgaagtcgctcaggtgaactc | vvi-miR395j *+10_perfect match probe                                  |
| vvi miR-1456 nat as  | agatccccagtggaagtgggc | vvi-miR395j *+10_mismatch probe                                       |
| vvi miR-1456 2mut as | agatcctcagtggaagcgggc | vvi-miR395k *-10_perfect match probe                                  |
| vvi miR-1457 nat as  | aagggaactctaggggga    | vvi-miR395k *-10_mismatch probe                                       |
| vvi miR-1457 2mut as | aaggaaactctacggga     | vvi-miR395k *0_perfect match probe                                    |
| vvi miR-1458 nat as  | tgaagtggctcaagggaactc | vvi-miR395k *0_mismatch probe                                         |
| vvi miR-1458 2mut as | tgaagtcgtcaagtgaactc  | vvi-miR395k *+10_perfect match probe                                  |
| vvi miR-1459 nat as  | aggtccccagtggaagtgggc | vvi-miR395k *+10_mismatch probe                                       |
| vvi miR-1459 2mut as | aggtcctcagtggaagcgggc | vvi-miR395l *-10_perfect match probe                                  |
| vvi miR-1460 nat as  | aggggaactctaggggggc   | vvi-miR395l *-10_mismatch probe                                       |
| vvi miR-1460 2mut as | agggaaactctagtgggc    | vvi-miR395l *0_perfect match probe                                    |
| vvi miR-1461 nat as  | tgaagtggctcaggggaactc | vvi-miR395l *0_mismatch probe                                         |
| vvi miR-1461 2mut as | tgaagtcgctcaggtgaactc | vvi-miR395l *+10_perfect match probe                                  |
| vvi miR-1462 nat as  | gatccccagtggaagtgggc  | vvi-miR395l *+10_mismatch probe                                       |
| vvi miR-1462 2mut as | gatccctcagtggaagcgggc | vvi-miR395m *-10_perfect match probe                                  |
| vvi miR-1463 nat as  | aagggaactctaggggac    | vvi-miR395m *-10_mismatch probe                                       |
| vvi miR-1463 2mut as | aaggaaactctagtggac    | vvi-miR395m *0_perfect match probe                                    |
| vvi miR-1464 nat as  | tgaagtgttcaagggaactc  | vvi-miR395m *0_mismatch probe                                         |
| vvi miR-1464 2mut as | tgaagcgttcaagtgaactc  |                                                                       |

|                      |                      |                                    |
|----------------------|----------------------|------------------------------------|
| vvi miR-1465 nat as  | aggtccccagtgaagtgttc | vvi-miR395m *+10_perfect match     |
| vvi miR-1465 2mut as | aggtcctcagtgaagcggtc | probe                              |
|                      |                      | vvi-miR395m *+10_mismatch probe    |
|                      |                      | vvi-miR395n *-10_perfect match     |
|                      |                      | probe                              |
| vvi miR-1466 nat as  | gggggaactctcaaggcc   | vvi-miR395n *-10_mismatch probe    |
| vvi miR-1466 2mut as | ggggaaactctaaaggcc   | vvi-miR395n *0_perfect match probe |
| vvi miR-1467 nat as  | tggaggggtgggggaactc  | vvi-miR395n *0_mismatch probe      |
| vvi miR-1467 2mut as | tggaggtgttggtgaactc  | vvi-miR395n *+10_perfect match     |
|                      |                      | probe                              |
| vvi miR-1468 nat as  | atggtcactggaggggtt   | vvi-miR395n *+10_mismatch probe    |
| vvi miR-1468 2mut as | atggccactggagtggtt   | vvi-miR396a *-10_perfect match     |
|                      |                      | probe                              |
| vvi miR-1469 nat as  | ttctgaactacttttccat  | vvi-miR396a *-10_mismatch probe    |
| vvi miR-1469 2mut as | ttcttaaactattttccat  | vvi-miR396a *0_perfect match probe |
| vvi miR-1470 nat as  | tccacagctttcttgaact  | vvi-miR396a *0_mismatch probe      |
| vvi miR-1470 2mut as | tccacagttttcttaaact  | vvi-miR396a *+10_perfect match     |
|                      |                      | probe                              |
| vvi miR-1471 nat as  | tgatcatgctttccacagct | vvi-miR396a *+10_mismatch probe    |
| vvi miR-1471 2mut as | tgatcatcctttcaacagct | vvi-miR396b *-10_perfect match     |
|                      |                      | probe                              |
| vvi miR-1472 nat as  | tcttgaacttcttctcctg  | vvi-miR396b *-10_mismatch probe    |
| vvi miR-1472 2mut as | tcttaaacttcttctcctg  | vvi-miR396b *0_perfect match probe |
| vvi miR-1473 nat as  | tccacagctttcttgaactt | vvi-miR396b *0_mismatch probe      |
| vvi miR-1473 2mut as | tccacagttttcttaaactt | vvi-miR396b *+10_perfect match     |
|                      |                      | probe                              |
| vvi miR-1474 nat as  | gccatgctttccacagctt  | vvi-miR396b *+10_mismatch probe    |
| vvi miR-1474 2mut as | gccatcctttcaacagctt  | vvi-miR396c *-10_perfect match     |
|                      |                      | probe                              |
| vvi miR-1475 nat as  | tctgagctgttggtgaac   | vvi-miR396c *-10_mismatch probe    |
| vvi miR-1475 2mut as | tctgagttgttggtgaac   | vvi-miR396c *0_perfect match probe |
| vvi miR-1476 nat as  | tccacaactttctgagctg  | vvi-miR396c *0_mismatch probe      |
| vvi miR-1476 2mut as | tccaaaactttctgagctg  | vvi-miR396c *+10_perfect match     |
|                      |                      | probe                              |
| vvi miR-1477 nat as  | tcagtaatgtccacaactt  |                                    |

|                      |                      |                                                                            |
|----------------------|----------------------|----------------------------------------------------------------------------|
| vvi miR-1477 2mut as | tcagtaatcttcaacaactt | vvi-miR396c *+10_mismatch probe<br>vvi-miR396d *-10_perfect match<br>probe |
| vvi miR-1478 nat as  | tattgaaccgcaactgttac | vvi-miR396d *-10_mismatch probe                                            |
| vvi miR-1478 2mut as | tattgaacccaaactgttac | vvi-miR396d *0_perfect match probe                                         |
| vvi miR-1479 nat as  | cccacagctttattgaaccg | vvi-miR396d *0_mismatch probe                                              |
| vvi miR-1479 2mut as | cccacagttttattaaaccg | vvi-miR396d *+10_perfect match<br>probe                                    |
| vvi miR-1480 nat as  | ttggtatcttcccacagctt | vvi-miR396d *+10_mismatch probe                                            |
| vvi miR-1480 2mut as | ttggtattttctcacagctt | vvi-miR397a *-10_perfect match<br>probe                                    |
| vvi miR-1481 nat as  | agcgccaatggaatcaacca | vvi-miR397a *-10_mismatch probe                                            |
| vvi miR-1481 2mut as | agcgtcaatgaaatcaacca | vvi-miR397a *0_perfect match probe                                         |
| vvi miR-1482 nat as  | gattgagtgcagcgccaatg | vvi-miR397a *0_mismatch probe                                              |
| vvi miR-1482 2mut as | gattgagtgaagccccaatg | vvi-miR397a *+10_perfect match<br>probe                                    |
| vvi miR-1483 nat as  | gacatgattgagtgc      | vvi-miR397a *+10_mismatch probe                                            |
| vvi miR-1483 2mut as | gacataattaagtgc      | vvi-miR397b *-10_perfect match<br>probe                                    |
| vvi miR-1484 nat as  | agcgccaatggaatcaacca | vvi-miR397b *-10_mismatch probe                                            |
| vvi miR-1484 2mut as | agcgtcaatgaaatcaacca | vvi-miR397b *0_perfect match probe                                         |
| vvi miR-1485 nat as  | gattgagtgcagcgccaatg | vvi-miR397b *0_mismatch probe                                              |
| vvi miR-1485 2mut as | gattgagtgaagccccaatg | vvi-miR397b *+10_perfect match<br>probe                                    |
| vvi miR-1486 nat as  | gacatgattgagtgc      | vvi-miR397b *+10_mismatch probe                                            |
| vvi miR-1486 2mut as | gacataattaagtgc      | vvi-miR398a *-10_perfect match<br>probe                                    |
| vvi miR-1487 nat as  | gccactcccttgggggtgt  | vvi-miR398a *-10_mismatch probe                                            |
| vvi miR-1487 2mut as | gccactctcttgggtgtgt  | vvi-miR398a *0_perfect match probe                                         |
| vvi miR-1488 nat as  | gttctcaggtgccactccct | vvi-miR398a *0_mismatch probe                                              |
| vvi miR-1488 2mut as | gttctcagctgtcactccct | vvi-miR398a *+10_perfect match<br>probe                                    |
| vvi miR-1489 nat as  | cacaaccggtgttctcaggt | vvi-miR398a *+10_mismatch probe                                            |
| vvi miR-1489 2mut as | cacaaccagtcttctcaggt | vvi-miR398b *-10_perfect match                                             |
| vvi miR-1490 nat as  | gtcacacctgtaggacac   |                                                                            |

|                      |                      |                                      |
|----------------------|----------------------|--------------------------------------|
| vvi miR-1490 2mut as | gtcacatctgtagaacac   | probe                                |
| vvi miR-1491 nat as  | tgatttcagggtcacacctg | vvi-miR398b *-10_mismatch probe      |
| vvi miR-1491 2mut as | tgatttcacctcacacctg  | vvi-miR398b *0_perfect match probe   |
|                      |                      | vvi-miR398b *0_mismatch probe        |
|                      |                      | vvi-miR398b *+10_perfect match probe |
| vvi miR-1492 nat as  | tgcgggcatgtgattctcag | vvi-miR398b *+10_mismatch probe      |
| vvi miR-1492 2mut as | tgcggccatgcgattctcag | vvi-miR398c *-10_perfect match probe |
|                      |                      | vvi-miR398c *-10_mismatch probe      |
| vvi miR-1493 nat as  | gtcactcctgtaggacac   | vvi-miR398c *0_perfect match probe   |
| vvi miR-1493 2mut as | gtcacttctgtagaacac   | vvi-miR398c *0_mismatch probe        |
| vvi miR-1494 nat as  | tgatttcagggtcactcctg | vvi-miR398c *+10_perfect match probe |
| vvi miR-1494 2mut as | tgatttcacctcactcctg  | vvi-miR398c *+10_mismatch probe      |
|                      |                      | vvi-miR398c *+10_perfect match probe |
| vvi miR-1495 nat as  | tgcgggcatgtgattctcag | vvi-miR398c *+10_mismatch probe      |
| vvi miR-1495 2mut as | tgcggccatgcgattctcag | vvi-miR399a *-10_perfect match probe |
|                      |                      | vvi-miR399a *-10_mismatch probe      |
| vvi miR-1496 nat as  | aatcacactgttattctc   | vvi-miR399a *0_perfect match probe   |
| vvi miR-1496 2mut as | aatcacctcttattctc    | vvi-miR399a *0_mismatch probe        |
| vvi miR-1497 nat as  | gccaaaggagaatcacactg | vvi-miR399a *+10_perfect match probe |
| vvi miR-1497 2mut as | gccaaagaagaatcccactg | vvi-miR399a *+10_mismatch probe      |
|                      |                      | vvi-miR399a *+10_perfect match probe |
| vvi miR-1498 nat as  | tgatatctctgccaaaggag | vvi-miR399b *-10_perfect match probe |
| vvi miR-1498 2mut as | tgatatctccgtcaaaggag | vvi-miR399b *-10_mismatch probe      |
|                      |                      | vvi-miR399b *0_perfect match probe   |
| vvi miR-1499 nat as  | aggtgccctatgattgat   | vvi-miR399b *0_mismatch probe        |
| vvi miR-1499 2mut as | aggtgtcctataattgat   | vvi-miR399b *+10_perfect match probe |
| vvi miR-1500 nat as  | gccaaagaagaggtgcccta | vvi-miR399b *+10_mismatch probe      |
| vvi miR-1500 2mut as | gccaaagaacaggtgtccta | vvi-miR399b *+10_perfect match probe |
|                      |                      | vvi-miR399b *+10_mismatch probe      |
| vvi miR-1501 nat as  | gccagtgcctgccaaagaag | vvi-miR399c *-10_perfect match probe |
| vvi miR-1501 2mut as | gccagtgtctgtcaagaag  | vvi-miR399c *-10_mismatch probe      |
|                      |                      | vvi-miR399c *-10_perfect match probe |
| vvi miR-1502 nat as  | agaggccctgagaccggt   | vvi-miR399c *-10_mismatch probe      |
| vvi miR-1502 2mut as | agaggctctgagatcggt   |                                      |

|                      |                         |                                      |
|----------------------|-------------------------|--------------------------------------|
| vvi miR-1503 nat as  | accaagtgaaagaggccctg    | vvi-miR399c *0_perfect match probe   |
| vvi miR-1503 2mut as | accaagcgaaagaggtcctg    | vvi-miR399c *0_mismatch probe        |
| vvi miR-1504 nat as  | tatgtcacctaccaagtgaa    | vvi-miR399c *+10_perfect match probe |
| vvi miR-1504 2mut as | tatgtcatctacaagtgaa     | vvi-miR399c *+10_mismatch probe      |
| vvi miR-1505 nat as  | aaatctgctctataatttac    | vvi-miR399d *-10_perfect match probe |
| vvi miR-1505 2mut as | aaatctctccataatttac     | vvi-miR399d *-10_mismatch probe      |
| vvi miR-1506 nat as  | ctgcaaaaagaaatctgctc    | vvi-miR399d *0_perfect match probe   |
| vvi miR-1506 2mut as | ctgcaaaaagaaatccgctc    | vvi-miR399d *0_mismatch probe        |
| vvi miR-1507 nat as  | tgatcgccatctgcaaaaag    | vvi-miR399d *+10_perfect match probe |
| vvi miR-1507 2mut as | tgatccccatctgtcaaaaag   | vvi-miR399d *+10_mismatch probe      |
| vvi miR-1508 nat as  | taatttgccctgtaatatgc    | vvi-miR399e *-10_perfect match probe |
| vvi miR-1508 2mut as | taattgtcctctaatatgc     | vvi-miR399e *-10_mismatch probe      |
| vvi miR-1509 nat as  | tgcaaaaagataattgccc     | vvi-miR399e *0_perfect match probe   |
| vvi miR-1509 2mut as | tgcaaaaacataattgccc     | vvi-miR399e *0_mismatch probe        |
| vvi miR-1510 nat as  | agtggctgcctgcaaaaaga    | vvi-miR399e *+10_perfect match probe |
| vvi miR-1510 2mut as | agtggctgtctgtcaaaaaga   | vvi-miR399e *+10_mismatch probe      |
| vvi miR-1511 nat as  | ccctctaataatgcaac       | vvi-miR399f *-10_perfect match probe |
| vvi miR-1511 2mut as | ccctttaatccaac          | vvi-miR399f *-10_mismatch probe      |
| vvi miR-1512 nat as  | gcagatttgccctctaataatg  | vvi-miR399f *0_perfect match probe   |
| vvi miR-1512 2mut as | gcagatttgctcctctaataatg | vvi-miR399f *0_mismatch probe        |
| vvi miR-1513 nat as  | tcatgcaaaagcagatttgg    | vvi-miR399f *+10_perfect match probe |
| vvi miR-1513 2mut as | tcatgtcaaaagaagatttgg   | vvi-miR399f *+10_mismatch probe      |
| vvi miR-1514 nat as  | agtattgcccagcaattcat    | vvi-miR399g *-10_perfect match probe |
| vvi miR-1514 2mut as | agtattgtccagaaattcat    | vvi-miR399g *-10_mismatch probe      |
| vvi miR-1515 nat as  | ctgccaatggagattgccc     | vvi-miR399g *0_perfect match probe   |
| vvi miR-1515 2mut as | ctgccaatcgactattgccc    | vvi-miR399g *0_mismatch probe        |

|                      |                       |                                      |
|----------------------|-----------------------|--------------------------------------|
| vvi miR-1516 nat as  | gagtggccaactgccaatgg  | vvi-miR399g *+10_perfect match probe |
| vvi miR-1516 2mut as | gagtggccaactgtcaatgg  | vvi-miR399g *+10_mismatch probe      |
| vvi miR-1517 nat as  | gattgcaactgttattcct   | vvi-miR399h *-10_perfect match probe |
| vvi miR-1517 2mut as | gattgaactcttattcct    | vvi-miR399h *-10_mismatch probe      |
| vvi miR-1518 nat as  | gccaaaggaggattgcaactg | vvi-miR399h *0_perfect match probe   |
| vvi miR-1518 2mut as | gccaaagaaggattgaactg  | vvi-miR399h *0_mismatch probe        |
| vvi miR-1519 nat as  | tgatctttctgccaaaggag  | vvi-miR399h *+10_perfect match probe |
| vvi miR-1519 2mut as | tgatctttccgtcaaaggag  | vvi-miR399h *+10_mismatch probe      |
| vvi miR-1520 nat as  | agaagccctacaactact    | vvi-miR399i *-10_perfect match probe |
| vvi miR-1520 2mut as | agaagtcctaaaactact    | vvi-miR399i *-10_mismatch probe      |
| vvi miR-1521 nat as  | ccagaaggagagaagcccta  | vvi-miR399i *0_perfect match probe   |
| vvi miR-1521 2mut as | ccagaagaagagaagtccta  | vvi-miR399i *0_mismatch probe        |
| vvi miR-1522 nat as  | ccatctcctgccagaaggag  | vvi-miR399i *+10_perfect match probe |
| vvi miR-1522 2mut as | ccatctcctctcagaaggag  | vvi-miR399i *+10_mismatch probe      |
| vvi miR-1523 nat as  | cgcaaaacttgagatgtgc   | vvi-miR403a *-10_perfect match probe |
| vvi miR-1523 2mut as | cgcaaaaacttaagatgtgc  | vvi-miR403a *-10_mismatch probe      |
| vvi miR-1524 nat as  | gtttgattcacgcacaaact  | vvi-miR403a *0_perfect match probe   |
| vvi miR-1524 2mut as | gtttgattccccacaaact   | vvi-miR403a *0_mismatch probe        |
| vvi miR-1525 nat as  | ctacgatggggtttgattca  | vvi-miR403a *+10_perfect match probe |
| vvi miR-1525 2mut as | ctacgatggtctttgattca  | vvi-miR403a *+10_mismatch probe      |
| vvi miR-1526 nat as  | cacaaactcgaggtttgt    | vvi-miR403b *-10_perfect match probe |
| vvi miR-1526 2mut as | cacaaactaaaggtttgt    | vvi-miR403b *-10_mismatch probe      |
| vvi miR-1527 nat as  | tggattcgcgcacaaactcg  | vvi-miR403b *0_perfect match probe   |
| vvi miR-1527 2mut as | tggattcgccaacaaactcg  | vvi-miR403b *0_mismatch probe        |
| vvi miR-1528 nat as  | atcgaggcgttgattcgcg   | vvi-miR403b *+10_perfect match probe |

|                      |                       |                                                                            |
|----------------------|-----------------------|----------------------------------------------------------------------------|
| vvi miR-1528 2mut as | atcgaggagttcgattcgcg  | vvi-miR403b *+10_mismatch probe<br>vvi-miR403c *-10_perfect match<br>probe |
| vvi miR-1529 nat as  | cacaaacttgagatgtgc    | vvi-miR403c *-10_mismatch probe                                            |
| vvi miR-1529 2mut as | cacaaatttaagatgtgc    | vvi-miR403c *0_perfect match probe                                         |
| vvi miR-1530 nat as  | ttgattcacgcacaaacttg  | vvi-miR403c *0_mismatch probe                                              |
| vvi miR-1530 2mut as | ttgattcaccaacaaacttg  | vvi-miR403c *+10_perfect match<br>probe                                    |
| vvi miR-1531 nat as  | acgatggggtttgattcacg  | vvi-miR403c *+10_mismatch probe                                            |
| vvi miR-1531 2mut as | acgatgggtggttaattcacg | vvi-miR403d *-10_perfect match<br>probe                                    |
| vvi miR-1532 nat as  | cacaaactcgaggtttgt    | vvi-miR403d *-10_mismatch probe                                            |
| vvi miR-1532 2mut as | cacaaactaaaggtttgt    | vvi-miR403d *0_perfect match probe                                         |
| vvi miR-1533 nat as  | tggattcgcgcacaaactcg  | vvi-miR403d *0_mismatch probe                                              |
| vvi miR-1533 2mut as | tggattcgccaacaaactcg  | vvi-miR403d *+10_perfect match<br>probe                                    |
| vvi miR-1534 nat as  | attgagggggttgattcgcg  | vvi-miR403d *+10_mismatch probe                                            |
| vvi miR-1534 2mut as | attgaggtgttcgattcgcg  | vvi-miR403e *-10_perfect match<br>probe                                    |
| vvi miR-1535 nat as  | cacaaacttgagatgtgc    | vvi-miR403e *-10_mismatch probe                                            |
| vvi miR-1535 2mut as | cacaaatttaagatgtgc    | vvi-miR403e *0_perfect match probe                                         |
| vvi miR-1536 nat as  | ttgattcacgcacaaacttg  | vvi-miR403e *0_mismatch probe                                              |
| vvi miR-1536 2mut as | ttgattcaccaacaaacttg  | vvi-miR403e *+10_perfect match<br>probe                                    |
| vvi miR-1537 nat as  | acgatgggggttgattcacg  | vvi-miR403e *+10_mismatch probe                                            |
| vvi miR-1537 2mut as | acgatgggtggttaattcacg | vvi-miR403f *-10_perfect match<br>probe                                    |
| vvi miR-1538 nat as  | gcacaaactcctcatctca   | vvi-miR403f *-10_mismatch probe                                            |
| vvi miR-1538 2mut as | gcacaaacttttcatctca   | vvi-miR403f *0_perfect match probe                                         |
| vvi miR-1539 nat as  | ttagagtcacgcacaaactc  | vvi-miR403f *0_mismatch probe                                              |
| vvi miR-1539 2mut as | ttagagtcaccacaaactc   | vvi-miR403f *+10_perfect match<br>probe                                    |
| vvi miR-1540 nat as  | tcaggcggttttagagtcac  | vvi-miR403f *+10_mismatch probe                                            |
| vvi miR-1540 2mut as | tcaggaggttttagactcac  | vvi-miR408 *-10_perfect match                                              |
| vvi miR-1541 nat as  | ctcgtccccgtctctctt    |                                                                            |

|                      |                       |                                      |
|----------------------|-----------------------|--------------------------------------|
| vvi miR-1541 2mut as | ctcgtcccagttttctctt   | probe                                |
| vvi miR-1542 nat as  | catgcactacctcgccccg   | vvi-miR408 *-10_mismatch probe       |
| vvi miR-1542 2mut as | catgaactacctcctccccg  | vvi-miR408 *0_perfect match probe    |
|                      |                       | vvi-miR408 *0_mismatch probe         |
|                      |                       | vvi-miR408 *+10_perfect match probe  |
| vvi miR-1543 nat as  | tagttccatccatgcactac  | vvi-miR408 *+10_mismatch probe       |
| vvi miR-1543 2mut as | tagttcaatccatgaactac  | vvi-miR477a *-10_perfect match probe |
|                      |                       | vvi-miR477a *-10_mismatch probe      |
| vvi miR-1544 nat as  | tgtcttccaactttcaaacc  | vvi-miR477a *0_perfect match probe   |
| vvi miR-1544 2mut as | tgtcttccaactttcaaacc  | vvi-miR477a *0_mismatch probe        |
| vvi miR-1545 nat as  | ggtccccactgtcttccaa   | vvi-miR477a *+10_perfect match probe |
| vvi miR-1545 2mut as | ggtccctcactctcttccaa  | vvi-miR477a *+10_mismatch probe      |
| vvi miR-1546 nat as  | aagcttccaagggtccccac  | vvi-miR477a *+10_perfect match probe |
| vvi miR-1546 2mut as | aagcttcaaagggtcctccac | vvi-miR479 *-10_perfect match probe  |
|                      |                       | vvi-miR479 *-10_mismatch probe       |
| vvi miR-1547 nat as  | tcggctcgtctttgagccga  | vvi-miR479 *0_perfect match probe    |
| vvi miR-1547 2mut as | tcggctcctctttgaccga   | vvi-miR479 *0_mismatch probe         |
| vvi miR-1548 nat as  | tgatattggttcggctcgtc  | vvi-miR479 *+10_perfect match probe  |
| vvi miR-1548 2mut as | tgatattcgttcgctcgtc   | vvi-miR479 *+10_mismatch probe       |
| vvi miR-1549 nat as  | catacaagagtgatattggt  | vvi-miR482a *-10_perfect match probe |
| vvi miR-1549 2mut as | cataaaagagcgatattggt  | vvi-miR482a *-10_mismatch probe      |
|                      |                       | vvi-miR482a *0_perfect match probe   |
|                      |                       | vvi-miR482a *0_mismatch probe        |
|                      |                       | vvi-miR482a *+10_perfect match probe |
| vvi miR-1550 nat as  | ctccaattccaaacatt     | vvi-miR482a *+10_mismatch probe      |
| vvi miR-1550 2mut as | ctccaatttcaaacatt     | vvi-miR535a *-10_perfect match probe |
| vvi miR-1551 nat as  | ctttctactctccaattcc   | vvi-miR535a *-10_mismatch probe      |
| vvi miR-1551 2mut as | cttttctactctcaaattcc  |                                      |
| vvi miR-1552 nat as  | gatggctaagctttctact   |                                      |
| vvi miR-1552 2mut as | gatgcctaagtttctact    |                                      |
| vvi miR-1553 nat as  | agagcacgcctgtacacagt  |                                      |
| vvi miR-1553 2mut as | agagcaccctgtaccagtt   |                                      |

|                      |                      |                                      |
|----------------------|----------------------|--------------------------------------|
| vvi miR-1554 nat as  | acagcgagagagagcagcc  | vvi-miR535a *0_perfect match probe   |
| vvi miR-1554 2mut as | acagagagagagagaacgcc | vvi-miR535a *0_mismatch probe        |
| vvi miR-1555 nat as  | agattgtatgacagcgagag | vvi-miR535a *+10_perfect match probe |
| vvi miR-1555 2mut as | agattctatgacagagagag | vvi-miR535a *+10_mismatch probe      |
| vvi miR-1556 nat as  | agagcagcctgtacacagt  | vvi-miR535b *-10_perfect match probe |
| vvi miR-1556 2mut as | agagcaccctgtaccagt   | vvi-miR535b *-10_mismatch probe      |
| vvi miR-1557 nat as  | acagcgagagagagcagcc  | vvi-miR535b *0_perfect match probe   |
| vvi miR-1557 2mut as | acagagagagagagaacgcc | vvi-miR535b *0_mismatch probe        |
| vvi miR-1558 nat as  | agattgtatgacagcgagag | vvi-miR535b *+10_perfect match probe |
| vvi miR-1558 2mut as | agattctatgacagagagag | vvi-miR535b *+10_mismatch probe      |
| vvi miR-1559 nat as  | agagcagcctgtacacagt  | vvi-miR535c *-10_perfect match probe |
| vvi miR-1559 2mut as | agagcaccctgtaccagt   | vvi-miR535c *-10_mismatch probe      |
| vvi miR-1560 nat as  | acagcgagagagagcagcc  | vvi-miR535c *0_perfect match probe   |
| vvi miR-1560 2mut as | acagagagagagagaacgcc | vvi-miR535c *0_mismatch probe        |
| vvi miR-1561 nat as  | agattgtatgacagcgagag | vvi-miR535c *+10_perfect match probe |
| vvi miR-1561 2mut as | agattctatgacagagagag | vvi-miR535c *+10_mismatch probe      |
| vvi miR-1562 nat as  | agagcagcctgtacacagt  | vvi-miR535d *-10_perfect match probe |
| vvi miR-1562 2mut as | agagcaccctgtaccagt   | vvi-miR535d *-10_mismatch probe      |
| vvi miR-1563 nat as  | acagcgacagagagcagcc  | vvi-miR535d *0_perfect match probe   |
| vvi miR-1563 2mut as | acagagacagagagaacgcc | vvi-miR535d *0_mismatch probe        |
| vvi miR-1564 nat as  | agattgtatgacagcgacag | vvi-miR535d *+10_perfect match probe |
| vvi miR-1564 2mut as | agattctatgacagagacag | vvi-miR535d *+10_mismatch probe      |
| vvi miR-1565 nat as  | agagcagcctgtacacagt  | vvi-miR535e *-10_perfect match probe |
| vvi miR-1565 2mut as | agagcaccctgtaccagt   | vvi-miR535e *-10_mismatch probe      |
| vvi miR-1566 nat as  | acagcgacagagagcagcc  | vvi-miR535e *0_perfect match probe   |
| vvi miR-1566 2mut as | acagagacagagagaacgcc | vvi-miR535e *0_mismatch probe        |

|                      |                       |                                    |
|----------------------|-----------------------|------------------------------------|
| vvi miR-1567 nat as  | agattgtatgacagcgacag  | vvi-miR535e *+10_perfect match     |
| vvi miR-1567 2mut as | agattctatgacagagacag  | probe                              |
|                      |                       | vvi-miR535e *+10_mismatch probe    |
| vvi miR-1568 nat as  | gagcatctcaacaacaatcc  | vvi-miR828a *-10_perfect match     |
| vvi miR-1568 2mut as | gagcatctaaacaaaaatcc  | probe                              |
| vvi miR-1569 nat as  | ttcctcaaatgagcatctca  | vvi-miR828a *-10_mismatch probe    |
| vvi miR-1569 2mut as | ttcctaaaatgagaatctca  | vvi-miR828a *0_perfect match probe |
|                      |                       | vvi-miR828a *0_mismatch probe      |
| vvi miR-1570 nat as  | ttaaggttgcttctcaaat   | vvi-miR828a *+10_perfect match     |
| vvi miR-1570 2mut as | ttaaggttcctttctcaaat  | probe                              |
|                      |                       | vvi-miR828a *+10_mismatch probe    |
| vvi miR-1571 nat as  | tgactatccagggttgatgtg | vvi-miR828b *-10_perfect match     |
| vvi miR-1571 2mut as | tgactatcaagcttgatgtg  | probe                              |
| vvi miR-1572 nat as  | ttgcaggaaatgactatcca  | vvi-miR828b *-10_mismatch probe    |
| vvi miR-1572 2mut as | ttgcagaaaaatgcctatcca | vvi-miR828b *0_perfect match probe |
|                      |                       | vvi-miR828b *0_mismatch probe      |
| vvi miR-1573 nat as  | aaacctggtttgcaggaaa   | vvi-miR828b *+10_perfect match     |
| vvi miR-1573 2mut as | aaacctcggtttgaaggaaa  | probe                              |
|                      |                       | vvi-miR828b *+10_mismatch probe    |
| vvi miR-1574 nat as  | aggaactaatcaagtgaag   | vvi-miR845a *-10_perfect match     |
| vvi miR-1574 2mut as | aggaattaatcaagcgaaa   | probe                              |
| vvi miR-1575 nat as  | taactcatgaaggaactaat  | vvi-miR845a *-10_mismatch probe    |
| vvi miR-1575 2mut as | taactcataaagaaactaat  | vvi-miR845a *0_perfect match probe |
|                      |                       | vvi-miR845a *0_mismatch probe      |
| vvi miR-1576 nat as  | ttacttgcaataactcatga  | vvi-miR845a *+10_perfect match     |
| vvi miR-1576 2mut as | ttacttgaaataactaatga  | probe                              |
|                      |                       | vvi-miR845a *+10_mismatch probe    |
| vvi miR-1577 nat as  | aggaactaatcaagtgaag   | vvi-miR845b *-10_perfect match     |
| vvi miR-1577 2mut as | aggaattaatcaagcgaaa   | probe                              |
| vvi miR-1578 nat as  | taactcatgaaggaactaat  | vvi-miR845b *-10_mismatch probe    |
| vvi miR-1578 2mut as | taactcataaagaaactaat  | vvi-miR845b *0_perfect match probe |
|                      |                       | vvi-miR845b *0_mismatch probe      |
| vvi miR-1579 nat as  | ttgcttgaaataactcatga  | vvi-miR845b *+10_perfect match     |
|                      |                       | probe                              |

|                      |                       |                                                                            |
|----------------------|-----------------------|----------------------------------------------------------------------------|
| vvi miR-1579 2mut as | ttgcttaaataactaatga   | vvi-miR845b *+10_mismatch probe<br>vvi-miR845c *-10_perfect match<br>probe |
| vvi miR-1580 nat as  | aacccaaacacataattg    | vvi-miR845c *-10_mismatch probe                                            |
| vvi miR-1580 2mut as | aacccaaaaccataattg    | vvi-miR845c *0_perfect match probe                                         |
| vvi miR-1581 nat as  | aaactcagacaacccaaaaca | vvi-miR845c *0_mismatch probe                                              |
| vvi miR-1581 2mut as | aaactcagaaaaacaaaaaca | vvi-miR845c *+10_perfect match<br>probe                                    |
| vvi miR-1582 nat as  | tgccaacatgaaactcagac  | vvi-miR845c *+10_mismatch probe                                            |
| vvi miR-1582 2mut as | tgccaaaatgaaactaagac  | vvi-miR845d *-10_perfect match<br>probe                                    |
| vvi miR-1583 nat as  | ataattaatggttggttat   | vvi-miR845d *-10_mismatch probe                                            |
| vvi miR-1583 2mut as | ataattaacgttcggttat   | vvi-miR845d *0_perfect match probe                                         |
| vvi miR-1584 nat as  | ggccctaggataattaatg   | vvi-miR845d *0_mismatch probe                                              |
| vvi miR-1584 2mut as | ggccctagtctaattaatg   | vvi-miR845d *+10_perfect match<br>probe                                    |
| vvi miR-1585 nat as  | tttatcccatggccctaggg  | vvi-miR845d *+10_mismatch probe                                            |
| vvi miR-1585 2mut as | tttatctcatggtcctaggg  | vvi-miR845e *-10_perfect match<br>probe                                    |
| vvi miR-1586 nat as  | ataattaatgtgcgttct    | vvi-miR845e *-10_mismatch probe                                            |
| vvi miR-1586 2mut as | ataattaacgtgagtctct   | vvi-miR845e *0_perfect match probe                                         |
| vvi miR-1587 nat as  | ggccctaggataattaatg   | vvi-miR845e *0_mismatch probe                                              |
| vvi miR-1587 2mut as | ggccctagtctaattaatg   | vvi-miR845e *+10_perfect match<br>probe                                    |
| vvi miR-1588 nat as  | tttatcccatggccctaggg  | vvi-miR845e *+10_mismatch probe                                            |
| vvi miR-1588 2mut as | tttatctcatggtcctaggg  | vvi-miR156a ctrl_perfect match<br>probe                                    |
| vvi miR-1589 nat as  | gagtctttagctgatgctgg  | vvi-miR156a ctrl_mismatch probe                                            |
| vvi miR-1589 2mut as | gagtctttacctgatcctgg  | vvi-miR156b ctrl_perfect match<br>probe                                    |
| vvi miR-1590 nat as  | taaacttatacaattgcctc  | vvi-miR156b ctrl_mismatch probe                                            |
| vvi miR-1590 2mut as | taaatttatacaattccctc  | vvi-miR156c ctrl_perfect match<br>probe                                    |
| vvi miR-1591 nat as  | accatgcaagaacagacca   | vvi-miR156c ctrl_mismatch probe                                            |
| vvi miR-1591 2mut as | accatgaaagaaaagacca   |                                                                            |

|                      |                        |                                      |
|----------------------|------------------------|--------------------------------------|
| vvi miR-1592 nat as  | acccttatacaaattgectg   | vvi-miR156d ctrl_perfect match probe |
| vvi miR-1592 2mut as | acccttataaaaattccctg   | vvi-miR156d ctrl_mismatch probe      |
| vvi miR-1593 nat as  | ttcatgcaagaaaagaacca   | vvi-miR156e ctrl_perfect match probe |
| vvi miR-1593 2mut as | ttcatgaaagaaaacaacca   | vvi-miR156e ctrl_mismatch probe      |
| vvi miR-1594 nat as  | agccctcttgggtatgttca   | vvi-miR156f ctrl_perfect match probe |
| vvi miR-1594 2mut as | agccctcttctgtatgttca   | vvi-miR156f ctrl_mismatch probe      |
| vvi miR-1595 nat as  | aaactccatgcacatcatca   | vvi-miR156g ctrl_perfect match probe |
| vvi miR-1595 2mut as | aaactccatcaacatcatca   | vvi-miR156g ctrl_mismatch probe      |
| vvi miR-1596 nat as  | gttgtaattgttttccacc    | vvi-miR156h ctrl_perfect match probe |
| vvi miR-1596 2mut as | gttgtaattcttttccacc    | vvi-miR156h ctrl_mismatch probe      |
| vvi miR-1597 nat as  | tggctccttgcatcattcatca | vvi-miR156i ctrl_perfect match probe |
| vvi miR-1597 2mut as | tggctccttcaatttcatca   | vvi-miR156i ctrl_mismatch probe      |
| vvi miR-1598 nat as  | agaaagatcaaggcaaccac   | vvi-miR159a ctrl_perfect match probe |
| vvi miR-1598 2mut as | agaaagataaagccaaccac   | vvi-miR159a ctrl_mismatch probe      |
| vvi miR-1599 nat as  | agaaaagataaaagcaaaca   | vvi-miR159b ctrl_perfect match probe |
| vvi miR-1599 2mut as | agaaaacataaaagaaaaca   | vvi-miR159b ctrl_mismatch probe      |
| vvi miR-1600 nat as  | ggatctaaacttgataatg    | vvi-miR159c ctrl_perfect match probe |
| vvi miR-1600 2mut as | ggatctaaatttcgataatg   | vvi-miR159c ctrl_mismatch probe      |
| vvi miR-1601 nat as  | acaaccttgacaagcttctt   | vvi-miR160a ctrl_perfect match probe |
| vvi miR-1601 2mut as | acaatcttgacaagtttctt   | vvi-miR160a ctrl_mismatch probe      |
| vvi miR-1602 nat as  | cactctttaacaagcttctt   | vvi-miR160b ctrl_perfect match probe |
| vvi miR-1602 2mut as | cactttttaacaagtttctt   | vvi-miR160b ctrl_mismatch probe      |
| vvi miR-1603 nat as  | ggaaagggagtgtctctac    | vvi-miR160c ctrl_perfect match probe |
| vvi miR-1603 2mut as | ggaaagtgagtcgtctctac   | vvi-miR160c ctrl_mismatch probe      |

|                      |                       |                                      |
|----------------------|-----------------------|--------------------------------------|
| vvi miR-1604 nat as  | aatcctcgggtggactttgc  | vvi-miR160d ctrl_perfect match probe |
| vvi miR-1604 2mut as | aatcctcaggtcgactttgc  | vvi-miR160d ctrl_mismatch probe      |
| vvi miR-1605 nat as  | cactctttaacaagcttctt  | vvi-miR160e ctrl_perfect match probe |
| vvi miR-1605 2mut as | cacttttaacaagttctt    | vvi-miR160e ctrl_mismatch probe      |
| vvi miR-1606 nat as  | gatgtgccggtgggctctgc  | vvi-miR160f ctrl_perfect match probe |
| vvi miR-1606 2mut as | gatgtgctgggtgcctctgc  | vvi-miR160f ctrl_mismatch probe      |
| vvi miR-1607 nat as  | attcttgatctgctttttc   | vvi-miR162 ctrl_perfect match probe  |
| vvi miR-1607 2mut as | attcttaatctcctttttc   | vvi-miR162 ctrl_mismatch probe       |
| vvi miR-1608 nat as  | aagggggaaaagtgaggcaa  | vvi-miR164a ctrl_perfect match probe |
| vvi miR-1608 2mut as | aagggtgaaaagtgacgcaa  | vvi-miR164a ctrl_mismatch probe      |
| vvi miR-1609 nat as  | cagatccaggtgctgattga  | vvi-miR164b ctrl_perfect match probe |
| vvi miR-1609 2mut as | cagatcaaggtcctgattga  | vvi-miR164b ctrl_mismatch probe      |
| vvi miR-1610 nat as  | agagcagattagaatttggtg | vvi-miR164d ctrl_perfect match probe |
| vvi miR-1610 2mut as | agagaagattacaatttggtg | vvi-miR164d ctrl_mismatch probe      |
| vvi miR-1611 nat as  | caccaacacatgctcagtac  | vvi-miR166c ctrl_perfect match probe |
| vvi miR-1611 2mut as | caccaaccatcctcagtac   | vvi-miR166c ctrl_mismatch probe      |
| vvi miR-1612 nat as  | cactaacacataatcagagg  | vvi-miR166d ctrl_perfect match probe |
| vvi miR-1612 2mut as | cactaacccataatccgagg  | vvi-miR166d ctrl_mismatch probe      |
| vvi miR-1613 nat as  | caccaaccatgatcaaaga   | vvi-miR166e ctrl_perfect match probe |
| vvi miR-1613 2mut as | caccaactcatgataaaaga  | vvi-miR166e ctrl_mismatch probe      |
| vvi miR-1614 nat as  | ttttgaggtatacataaaa   | vvi-miR166f ctrl_perfect match probe |
| vvi miR-1614 2mut as | ttttgagctataaataaaa   | vvi-miR166f ctrl_mismatch probe      |
| vvi miR-1615 nat as  | cattcaaacgctgcttgagc  | vvi-miR166g ctrl_perfect match probe |
| vvi miR-1615 2mut as | cattcaaaccctccttgagc  | vvi-miR166g ctrl_mismatch probe      |
| vvi miR-1616 nat as  | cattcagattatgtctgtac  | vvi-miR166h ctrl_perfect match       |

|                      |                      |                                 |
|----------------------|----------------------|---------------------------------|
| vvi miR-1616 nat as  | cattccgattatctctgtac | probe                           |
| vvi miR-1616 2mut as |                      | vvi-miR166h ctrl_mismatch probe |
| vvi miR-1617 nat as  | caaccgattatgaagtaact | vvi-miR166a ctrl_perfect match  |
| vvi miR-1617 2mut as | caacagattataaagtaact | probe                           |
| vvi miR-1618 nat as  | cttcacttatatatcttctt | vvi-miR166a ctrl_mismatch probe |
| vvi miR-1618 2mut as | cttccttatatatttctt   | vvi-miR166b ctrl_perfect match  |
| vvi miR-1619 nat as  | gaaagagatggtgtttgttt | probe                           |
| vvi miR-1619 2mut as | gaaagagatcctgtttgttt | vvi-miR166b ctrl_mismatch probe |
| vvi miR-1620 nat as  | aaagggtgggcaacagaaaa | vvi-miR167a ctrl_perfect match  |
| vvi miR-1620 2mut as | aaagggtggcaacagaaaa  | probe                           |
| vvi miR-1621 nat as  | ccttgacttgataggaag   | vvi-miR167a ctrl_mismatch probe |
| vvi miR-1621 2mut as | ccttgacttctatagtgaag | vvi-miR167b ctrl_perfect match  |
| vvi miR-1622 nat as  | ttctctgtatccctagccaa | probe                           |
| vvi miR-1622 2mut as | ttctctctatctctagccaa | vvi-miR167b ctrl_mismatch probe |
| vvi miR-1623 nat as  | ctgttcacaaaggaagcaa  | vvi-miR167c ctrl_perfect match  |
| vvi miR-1623 2mut as | ctgttcccaaagtgaagcaa | probe                           |
| vvi miR-1624 nat as  | cgctgccggagcggcgaagt | vvi-miR167c ctrl_mismatch probe |
| vvi miR-1624 2mut as | cgctgtcggagcggagaagt | vvi-miR167d ctrl_perfect match  |
| vvi miR-1625 nat as  | tctcttctactatatataa  | probe                           |
| vvi miR-1625 2mut as | tctcttctccttatataa   | vvi-miR167d ctrl_mismatch probe |
| vvi miR-1626 nat as  | atthtgaaccttaaggagg  | vvi-miR167e ctrl_perfect match  |
| vvi miR-1626 2mut as | atthtgaatcttaacgagg  | probe                           |
| vvi miR-1627 nat as  | tctccaactcttgctgcaga | vvi-miR169y ctrl_mismatch probe |
| vvi miR-1627 2mut as | tctccaactcttgctccaga | vvi-miR169b ctrl_perfect match  |
|                      |                      | probe                           |
|                      |                      | vvi-miR169b ctrl_mismatch probe |

|                      |                      |                                      |
|----------------------|----------------------|--------------------------------------|
| vvi miR-1628 nat as  | gattaacgaggaatgcccca | vvi-miR169c ctrl_perfect match       |
| vvi miR-1628 2mut as | gattaaagaggaatgtccca | probe                                |
| vvi miR-1629 nat as  | tctcttctcactatataaa  | vvi-miR169c ctrl_mismatch probe      |
| vvi miR-1629 2mut as | tctcttctccttatataaa  | vvi-miR169d ctrl_perfect match       |
| vvi miR-1630 nat as  | aaattgaccacttgggata  | probe                                |
| vvi miR-1630 2mut as | aaattgactcacttgtgata | vvi-miR169d ctrl_mismatch probe      |
| vvi miR-1631 nat as  | attaacgatcgagcaaatta | vvi-miR169e ctrl_perfect match       |
| vvi miR-1631 2mut as | attaaagatcgagaaaatta | probe                                |
| vvi miR-1632 nat as  | ggcagatggctaagtagaga | vvi-miR169e ctrl_mismatch probe      |
| vvi miR-1632 2mut as | ggcagatgcctaactagaga | vvi-miR169f ctrl_perfect match probe |
| vvi miR-1633 nat as  | atgcctcaaatagtgacaaa | vvi-miR169f ctrl_mismatch probe      |
| vvi miR-1633 2mut as | atgcttcaaatacgacaaa  | vvi-miR169g ctrl_perfect match       |
| vvi miR-1634 nat as  | cctcaataccaactgaaaa  | probe                                |
| vvi miR-1634 2mut as | cctcaatataaactgaaaa  | vvi-miR169g ctrl_mismatch probe      |
| vvi miR-1635 nat as  | tcattccactctatatgtga | vvi-miR169h ctrl_perfect match       |
| vvi miR-1635 2mut as | tcattcaactttatatgtga | probe                                |
| vvi miR-1636 nat as  | tcattccactctatatgtga | vvi-miR169h ctrl_mismatch probe      |
| vvi miR-1636 2mut as | tcattcaactttatatgtga | vvi-miR169i ctrl_perfect match probe |
| vvi miR-1637 nat as  | agcttcaatgcttgatgcaa | vvi-miR169i ctrl_mismatch probe      |
| vvi miR-1637 2mut as | agcttcaatctttgatgcaa | vvi-miR169j ctrl_perfect match probe |
| vvi miR-1638 nat as  | accttaatgccttgctgcag | vvi-miR169j ctrl_mismatch probe      |
| vvi miR-1638 2mut as | accttaatgtcttctgcag  | vvi-miR169k ctrl_perfect match       |
| vvi miR-1639 nat as  | aaccctatgccttgctgcag | probe                                |
| vvi miR-1639 2mut as | aaccctatgtcttctgcag  | vvi-miR169k ctrl_mismatch probe      |
| vvi miR-1640 nat as  | agcttcaatgcttgctgctg | vvi-miR169l ctrl_perfect match probe |
|                      |                      | vvi-miR169l ctrl_mismatch probe      |
|                      |                      | vvi-miR169m ctrl_perfect match       |
|                      |                      | probe                                |
|                      |                      | vvi-miR169m ctrl_mismatch probe      |
|                      |                      | vvi-miR169n ctrl_perfect match       |
|                      |                      | probe                                |
|                      |                      | vvi-miR169n ctrl_mismatch probe      |
|                      |                      | vvi-miR169o ctrl_perfect match       |
|                      |                      | probe                                |

|                      |                       |                                      |
|----------------------|-----------------------|--------------------------------------|
| vvi miR-1640 2mut as | agcttcaatccttctgctg   | vvi-miR169o ctrl_mismatch probe      |
| vvi miR-1641 nat as  | acctaatgccttctgcag    | vvi-miR169p ctrl_perfect match probe |
| vvi miR-1641 2mut as | acctaatgtcttctgcag    | vvi-miR169p ctrl_mismatch probe      |
| vvi miR-1642 nat as  | ttaatatagacttactgcaa  | vvi-miR169q ctrl_perfect match probe |
| vvi miR-1642 2mut as | ttaatatagccttaccgcaa  | vvi-miR169q ctrl_mismatch probe      |
| vvi miR-1643 nat as  | gcatgccttctgcaaatata  | vvi-miR169r ctrl_perfect match probe |
| vvi miR-1643 2mut as | gcatgtcttctgaaaatata  | vvi-miR169r ctrl_mismatch probe      |
| vvi miR-1644 nat as  | tcgatggtgcctaatagcaa  | vvi-miR169s ctrl_perfect match probe |
| vvi miR-1644 2mut as | tcgatggtgtctaataccaa  | vvi-miR169s ctrl_mismatch probe      |
| vvi miR-1645 nat as  | caagtcttccgcaaatata   | vvi-miR169t ctrl_perfect match probe |
| vvi miR-1645 2mut as | caagtctttcccaaatata   | vvi-miR169t ctrl_mismatch probe      |
| vvi miR-1646 nat as  | cgtgcccttctgcaaatata  | vvi-miR169u ctrl_perfect match probe |
| vvi miR-1646 2mut as | cgtgtccttctgaaaatata  | vvi-miR169u ctrl_mismatch probe      |
| vvi miR-1647 nat as  | gacaaagctgcctactttca  | vvi-miR169v ctrl_perfect match probe |
| vvi miR-1647 2mut as | gacaaagctctctactttca  | vvi-miR169v ctrl_mismatch probe      |
| vvi miR-1648 nat as  | catgagtacaataaaggagg  | vvi-miR169w ctrl_perfect match probe |
| vvi miR-1648 2mut as | catgagtaaaataaacggag  | vvi-miR169w ctrl_mismatch probe      |
| vvi miR-1649 nat as  | agtgttttgaaacctggtgg  | vvi-miR169x ctrl_perfect match probe |
| vvi miR-1649 2mut as | agtgttttaaacctcgtgg   | vvi-miR169x ctrl_mismatch probe      |
| vvi miR-1650 nat as  | aaccaaagatctcaatggtt  | vvi-miR171a ctrl_perfect match probe |
| vvi miR-1650 2mut as | aaccaaactctaaatggtt   | vvi-miR171a ctrl_mismatch probe      |
| vvi miR-1651 nat as  | cacatggctaataatctcttc | vvi-miR171b ctrl_perfect match probe |
| vvi miR-1651 2mut as | cacatgcctaataatccttc  | vvi-miR171b ctrl_mismatch probe      |
| vvi miR-1652 nat as  | aaaaccagaactcaaaaaga  | vvi-miR171c ctrl_perfect match probe |
| vvi miR-1652 2mut as | aaaacaagaactaaaaaga   | vvi-miR171c ctrl_mismatch probe      |

|                      |                        |                                      |
|----------------------|------------------------|--------------------------------------|
| vvi miR-1653 nat as  | aacaacagagtcttaactt    | vvi-miR171d ctrl_perfect match probe |
| vvi miR-1653 2mut as | aacaaaagaggttttaactt   | vvi-miR171d ctrl_mismatch probe      |
| vvi miR-1654 nat as  | atcggtctttacggctcttc   | vvi-miR171e ctrl_perfect match probe |
| vvi miR-1654 2mut as | atcgtttttacgcctcttc    | vvi-miR171e ctrl_mismatch probe      |
| vvi miR-1655 nat as  | gagatcagtttttacattca   | vvi-miR171f ctrl_perfect match probe |
| vvi miR-1655 2mut as | gagatccgtttttaattca    | vvi-miR171f ctrl_mismatch probe      |
| vvi miR-1656 nat as  | gttgggtgtccccaccgatg   | vvi-miR171g ctrl_perfect match probe |
| vvi miR-1656 2mut as | gttgggtgtctcccacagatg  | vvi-miR171g ctrl_mismatch probe      |
| vvi miR-1657 nat as  | atcagagtcgatacattcat   | vvi-miR171h ctrl_perfect match probe |
| vvi miR-1657 2mut as | atcagagtagataaattcat   | vvi-miR171h ctrl_mismatch probe      |
| vvi miR-1658 nat as  | gattaaaggacccaaaacc    | vvi-miR171i ctrl_perfect match probe |
| vvi miR-1658 2mut as | gattaaagaactcaaaacc    | vvi-miR171i ctrl_mismatch probe      |
| vvi miR-1659 nat as  | gcaaatgcacgggtggtgatg  | vvi-miR172a ctrl_perfect match probe |
| vvi miR-1659 2mut as | gcaaatgaacagtggtgatg   | vvi-miR172a ctrl_mismatch probe      |
| vvi miR-1660 nat as  | gcgaaagccccggcgcgggcag | vvi-miR172b ctrl_perfect match probe |
| vvi miR-1660 2mut as | gcgaaagtccggcgaggcag   | vvi-miR172b ctrl_mismatch probe      |
| vvi miR-1661 nat as  | atcaaagagccatcggagtg   | vvi-miR172c ctrl_perfect match probe |
| vvi miR-1661 2mut as | atcaaagagtcatcagagtg   | vvi-miR172c ctrl_mismatch probe      |
| vvi miR-1662 nat as  | ctcaaaatctttggcagaga   | vvi-miR172d ctrl_perfect match probe |
| vvi miR-1662 2mut as | ctcaaaatctttgccagaga   | vvi-miR172d ctrl_mismatch probe      |
| vvi miR-1663 nat as  | tgacagccataactgaacgc   | vvi-miR319b ctrl_perfect match probe |
| vvi miR-1663 2mut as | tgacagtcataaccgaacgc   | vvi-miR319b ctrl_mismatch probe      |
| vvi miR-1664 nat as  | agggagcttaagatccaatt   | vvi-miR319c ctrl_perfect match probe |
| vvi miR-1664 2mut as | agggagtttaagatccaatt   | vvi-miR319c ctrl_mismatch probe      |

|                      |                      |                                      |
|----------------------|----------------------|--------------------------------------|
| vvi miR-1665 nat as  | aggagcatgaagttcatcat | vvi-miR319e ctrl_perfect match probe |
| vvi miR-1665 2mut as | aggagaatgaagttaatcat | vvi-miR319e ctrl_mismatch probe      |
| vvi miR-1666 nat as  | agacaagaaaaggatgaaat | vvi-miR319f ctrl_perfect match probe |
| vvi miR-1666 2mut as | agacaacaaaagaatgaaat | vvi-miR319f ctrl_mismatch probe      |
| vvi miR-1667 nat as  | tgggcaaagcgtgcggagga | vvi-miR319g ctrl_perfect match probe |
| vvi miR-1667 2mut as | tgggcaaagagtgaggagga | vvi-miR319g ctrl_mismatch probe      |
| vvi miR-1668 nat as  | caatcatttcatcatggct  | vvi-miR390 ctrl_perfect match probe  |
| vvi miR-1668 2mut as | caataatttcataatggct  | vvi-miR390 ctrl_mismatch probe       |
| vvi miR-1669 nat as  | aagagaggtggaagataacc | vvi-miR393a ctrl_perfect match probe |
| vvi miR-1669 2mut as | aagagaggtcaaagataacc | vvi-miR393a ctrl_mismatch probe      |
| vvi miR-1670 nat as  | gatccaaagacatggagagt | vvi-miR393b ctrl_perfect match probe |
| vvi miR-1670 2mut as | gatcaaaagacatcgagagt | vvi-miR393b ctrl_mismatch probe      |
| vvi miR-1671 nat as  | gaatatagaccatgatgtg  | vvi-miR394a ctrl_perfect match probe |
| vvi miR-1671 2mut as | gaatatagattcatgatgtg | vvi-miR394a ctrl_mismatch probe      |
| vvi miR-1672 nat as  | aaaagagagattttcaagag | vvi-miR394b ctrl_perfect match probe |
| vvi miR-1672 2mut as | aaaagagcgaatttaagag  | vvi-miR394b ctrl_mismatch probe      |
| vvi miR-1673 nat as  | aattcagaagaattggtata | vvi-miR394c ctrl_perfect match probe |
| vvi miR-1673 2mut as | aattccgaagaattcgtata | vvi-miR394c ctrl_mismatch probe      |
| vvi miR-1674 nat as  | gaagtcataaaactagcga  | vvi-miR395a ctrl_perfect match probe |
| vvi miR-1674 2mut as | gaagccataaaattagcga  | vvi-miR395a ctrl_mismatch probe      |
| vvi miR-1675 nat as  | gtaggcattcattagagaag | vvi-miR395b ctrl_perfect match probe |
| vvi miR-1675 2mut as | gtagccattcattagcgaag | vvi-miR395b ctrl_mismatch probe      |
| vvi miR-1676 nat as  | gaagtcattataactagaga | vvi-miR395c ctrl_perfect match probe |
| vvi miR-1676 2mut as | gaagccattataattagaga | vvi-miR395c ctrl_mismatch probe      |

|                      |                      |                                      |
|----------------------|----------------------|--------------------------------------|
| vvi miR-1677 nat as  | gaagtcattagagaagatcc | vvi-miR395d ctrl_perfect match probe |
| vvi miR-1677 2mut as | gaagccattagcgaagatcc | vvi-miR395d ctrl_mismatch probe      |
| vvi miR-1678 nat as  | gaagtcattataattagaga | vvi-miR395e ctrl_perfect match probe |
| vvi miR-1678 2mut as | gaagccattataattcgaga | vvi-miR395e ctrl_mismatch probe      |
| vvi miR-1679 nat as  | gaagtcattagagaagatcc | vvi-miR395f ctrl_perfect match probe |
| vvi miR-1679 2mut as | gaagccattagcgaagatcc | vvi-miR395f ctrl_mismatch probe      |
| vvi miR-1680 nat as  | gaattgaaaactaaggatcc | vvi-miR395g ctrl_perfect match probe |
| vvi miR-1680 2mut as | gaattaaaaactaagaatcc | vvi-miR395g ctrl_mismatch probe      |
| vvi miR-1681 nat as  | gaagtcattataattagaga | vvi-miR395h ctrl_perfect match probe |
| vvi miR-1681 2mut as | gaagccattataattcgaga | vvi-miR395h ctrl_mismatch probe      |
| vvi miR-1682 nat as  | gaagtcattacagaagatcc | vvi-miR395i ctrl_perfect match probe |
| vvi miR-1682 2mut as | gaagccattaaagaagatcc | vvi-miR395i ctrl_mismatch probe      |
| vvi miR-1683 nat as  | gaagtcattaaagaagatcc | vvi-miR395j ctrl_perfect match probe |
| vvi miR-1683 2mut as | gaagccattaaagaacatcc | vvi-miR395j ctrl_mismatch probe      |
| vvi miR-1684 nat as  | gaagtcattataattagaga | vvi-miR395k ctrl_perfect match probe |
| vvi miR-1684 2mut as | gaagccattataattcgaga | vvi-miR395k ctrl_mismatch probe      |
| vvi miR-1685 nat as  | gaagtcattacagaagatcc | vvi-miR395l ctrl_perfect match probe |
| vvi miR-1685 2mut as | gaagccattaaagaagatcc | vvi-miR395l ctrl_mismatch probe      |
| vvi miR-1686 nat as  | gaagtcattataactagaga | vvi-miR395m ctrl_perfect match probe |
| vvi miR-1686 2mut as | gaagccattataattagaga | vvi-miR395m ctrl_mismatch probe      |
| vvi miR-1687 nat as  | aggaaatcacctggaata   | vvi-miR395n ctrl_perfect match probe |
| vvi miR-1687 2mut as | aggaaatcattctggaata  | vvi-miR395n ctrl_mismatch probe      |
| vvi miR-1688 nat as  | tcttcataaggagtgtgaaa | vvi-miR396a ctrl_perfect match probe |
| vvi miR-1688 2mut as | tcttcataacaagtgtgaaa | vvi-miR396a ctrl_mismatch probe      |
| vvi miR-1689 nat as  | ctcctacgtttacccatcca | vvi-miR396b ctrl_perfect match probe |

|                      |                       |                                      |
|----------------------|-----------------------|--------------------------------------|
| vvi miR-1689 2mut as | ctcctacctttactcatcca  | vvi-miR396b ctrl_mismatch probe      |
| vvi miR-1690 nat as  | atggaagtggaaggcttcca  | vvi-miR396c ctrl_perfect match probe |
| vvi miR-1690 2mut as | atggaagtcgaagccttcca  | vvi-miR396c ctrl_mismatch probe      |
| vvi miR-1691 nat as  | acacaccagtagtctgaaaa  | vvi-miR396d ctrl_perfect match probe |
| vvi miR-1691 2mut as | acacacaagtagcctgaaaa  | vvi-miR396d ctrl_mismatch probe      |
| vvi miR-1692 nat as  | tgaaaaatggaatacttcag  | vvi-miR397a ctrl_perfect match probe |
| vvi miR-1692 2mut as | tgaaaaatcgaatatttcag  | vvi-miR397a ctrl_mismatch probe      |
| vvi miR-1693 nat as  | tgaaaaatggaatacttcag  | vvi-miR397b ctrl_perfect match probe |
| vvi miR-1693 2mut as | tgaaaaatcgaatatttcag  | vvi-miR397b ctrl_mismatch probe      |
| vvi miR-1694 nat as  | tgcattagctagcagagctt  | vvi-miR398a ctrl_perfect match probe |
| vvi miR-1694 2mut as | tgcattagttagaagagctt  | vvi-miR398a ctrl_mismatch probe      |
| vvi miR-1695 nat as  | gagcaaagatgggtggtgcg  | vvi-miR398b ctrl_perfect match probe |
| vvi miR-1695 2mut as | gagcaaacatgtgtggtgcg  | vvi-miR398b ctrl_mismatch probe      |
| vvi miR-1696 nat as  | gagcaaagatgggtgatgcg  | vvi-miR398c ctrl_perfect match probe |
| vvi miR-1696 2mut as | gagcaaacatgtgtgatgcg  | vvi-miR398c ctrl_mismatch probe      |
| vvi miR-1697 nat as  | cagctaccgccttctactcc  | vvi-miR399a ctrl_perfect match probe |
| vvi miR-1697 2mut as | cagctacccttctactcc    | vvi-miR399a ctrl_mismatch probe      |
| vvi miR-1698 nat as  | cacatcttttactgcagct   | vvi-miR399b ctrl_perfect match probe |
| vvi miR-1698 2mut as | cacatttttactgaagct    | vvi-miR399b ctrl_mismatch probe      |
| vvi miR-1699 nat as  | cattcacatctatgtcacct  | vvi-miR399c ctrl_perfect match probe |
| vvi miR-1699 2mut as | cattcccctctatctcacct  | vvi-miR399c ctrl_mismatch probe      |
| vvi miR-1700 nat as  | aacactcaatgccctttgagc | vvi-miR399d ctrl_perfect match probe |
| vvi miR-1700 2mut as | aacactcaatctcctttgagc | vvi-miR399d ctrl_mismatch probe      |

|                      |                       |                                      |
|----------------------|-----------------------|--------------------------------------|
| vvi miR-1701 nat as  | ggcactacaagaatgcat    | vvi-miR399e ctrl_perfect match probe |
| vvi miR-1701 2mut as | ggcaccctacaacaatgcat  | vvi-miR399e ctrl_mismatch probe      |
| vvi miR-1702 nat as  | agaagactgcagacacagac  | vvi-miR399f ctrl_perfect match probe |
| vvi miR-1702 2mut as | agaagactgaagaccagac   | vvi-miR399f ctrl_mismatch probe      |
| vvi miR-1703 nat as  | agcttagtctgctactgtg   | vvi-miR399g ctrl_perfect match probe |
| vvi miR-1703 2mut as | agcttagcctcctactgtg   | vvi-miR399g ctrl_mismatch probe      |
| vvi miR-1704 nat as  | cagaagtatgcatgtgcatg  | vvi-miR399h ctrl_perfect match probe |
| vvi miR-1704 2mut as | cagaagtatccatgtccatg  | vvi-miR399h ctrl_mismatch probe      |
| vvi miR-1705 nat as  | cattggaagttaatacaacac | vvi-miR399i ctrl_perfect match probe |
| vvi miR-1705 2mut as | cattcgaagttaataaacac  | vvi-miR399i ctrl_mismatch probe      |
| vvi miR-1706 nat as  | cgtcgaatcgccccgtgatt  | vvi-miR403a ctrl_perfect match probe |
| vvi miR-1706 2mut as | cgtcgaatcctcccgtgatt  | vvi-miR403a ctrl_mismatch probe      |
| vvi miR-1707 nat as  | cccttgaaagaagatcgag   | vvi-miR403b ctrl_perfect match probe |
| vvi miR-1707 2mut as | ccctttaaagaacatcgag   | vvi-miR403b ctrl_mismatch probe      |
| vvi miR-1708 nat as  | cgtcgaatcgccccgtgatt  | vvi-miR403c ctrl_perfect match probe |
| vvi miR-1708 2mut as | cgtcgaatcctcccgtgatt  | vvi-miR403c ctrl_mismatch probe      |
| vvi miR-1709 nat as  | cccttgaaagaagattgag   | vvi-miR403d ctrl_perfect match probe |
| vvi miR-1709 2mut as | ccctttaaagaacattgag   | vvi-miR403d ctrl_mismatch probe      |
| vvi miR-1710 nat as  | cgtcgaatcgccccgtgatt  | vvi-miR403e ctrl_perfect match probe |
| vvi miR-1710 2mut as | cgtcgaatcctcccgtgatt  | vvi-miR403e ctrl_mismatch probe      |
| vvi miR-1711 nat as  | catagaaaaggatcgcac    | vvi-miR403f ctrl_perfect match probe |
| vvi miR-1711 2mut as | catagaaaacgtatccatc   | vvi-miR403f ctrl_mismatch probe      |
| vvi miR-1712 nat as  | tagagcaaaaacagcttaac  | vvi-miR408 ctrl_perfect match probe  |
| vvi miR-1712 2mut as | tagagaaaaaacagttaac   | vvi-miR408 ctrl_mismatch probe       |
| vvi miR-1713 nat as  | accttgataatcagccagga  | vvi-miR477a ctrl_perfect match probe |

|                      |                      |                                      |
|----------------------|----------------------|--------------------------------------|
| vvi miR-1713 2mut as | acctaataatcagtcagga  | vvi-miR477a ctrl_mismatch probe      |
| vvi miR-1714 nat as  | gccgatgaaatgaatgaaa  | vvi-miR479 ctrl_perfect match probe  |
| vvi miR-1714 2mut as | gccgataaaaataaatgaaa | vvi-miR479 ctrl_mismatch probe       |
| vvi miR-1715 nat as  | gactagctctagacccccaa | vvi-miR482a ctrl_perfect match probe |
| vvi miR-1715 2mut as | gactagtctagaccccaa   | vvi-miR482a ctrl_mismatch probe      |
| vvi miR-1716 nat as  | tgttctcgcgatgaatgctg | vvi-miR535a ctrl_perfect match probe |
| vvi miR-1716 2mut as | tgttctcccataaatgctg  | vvi-miR535a ctrl_mismatch probe      |
| vvi miR-1717 nat as  | tgttctcgcgatgaatgctg | vvi-miR535b ctrl_perfect match probe |
| vvi miR-1717 2mut as | tgttctcccataaatgctg  | vvi-miR535b ctrl_mismatch probe      |
| vvi miR-1718 nat as  | tgttctcgcgatgaatgctg | vvi-miR535c ctrl_perfect match probe |
| vvi miR-1718 2mut as | tgttctcccataaatgctg  | vvi-miR535c ctrl_mismatch probe      |
| vvi miR-1719 nat as  | tgttctcgcgatgaatgcag | vvi-miR535d ctrl_perfect match probe |
| vvi miR-1719 2mut as | tgttctcccataaatgcag  | vvi-miR535d ctrl_mismatch probe      |
| vvi miR-1720 nat as  | tgttctcgcgatgaatgcag | vvi-miR535e ctrl_perfect match probe |
| vvi miR-1720 2mut as | tgttctcccataaatgcag  | vvi-miR535e ctrl_mismatch probe      |
| vvi miR-1721 nat as  | tcattgcttcacaagctgtt | vvi-miR828a ctrl_perfect match probe |
| vvi miR-1721 2mut as | tcattccttcacaagttgtt | vvi-miR828a ctrl_mismatch probe      |
| vvi miR-1722 nat as  | ggaaatgactatccagggtg | vvi-miR828b ctrl_perfect match probe |
| vvi miR-1722 2mut as | ggaaatgcctatcaagggtg | vvi-miR828b ctrl_mismatch probe      |
| vvi miR-1723 nat as  | ctcttgcttaagacttaatc | vvi-miR845a ctrl_perfect match probe |
| vvi miR-1723 2mut as | ctcttccttaagccttaatc | vvi-miR845a ctrl_mismatch probe      |
| vvi miR-1724 nat as  | ctcttgcttaagacttaatc | vvi-miR845b ctrl_perfect match probe |
| vvi miR-1724 2mut as | ctcttccttaagccttaatc | vvi-miR845b ctrl_mismatch probe      |
| vvi miR-1725 nat as  | gttaatcattaagaaattg  | vvi-miR845c ctrl_perfect match probe |

|                                              |                                                  |                                                                              |
|----------------------------------------------|--------------------------------------------------|------------------------------------------------------------------------------|
| vvi miR-1725 2mut as                         | gtttaataattaacaaattg                             | probe<br>vvi-miR845c ctrl_mismatch probe<br>vvi-miR845d ctrl_perfect match   |
| vvi miR-1726 nat as <br>vvi miR-1726 2mut as | gtagtaattgtgctagaac<br>gttactaattgtcctagaac      | probe<br>vvi-miR845d ctrl_mismatch probe<br>vvi-miR845e ctrl_perfect match   |
| vvi miR-1727 nat as <br>vvi miR-1727 2mut as | gtagtaatcgtgctagaac<br>gtagtaatagtcctagaac       | probe<br>vvi-miR845e ctrl_mismatch probe<br>vvi-miR156a compl_perfect match  |
| vvi miR-1728 nat as <br>vvi miR-1728 2mut as | tgacagaagagagggagcac<br>tgaccgaagagagtgagcac     | probe<br>vvi-miR156a compl_mismatch probe<br>vvi-miR156b compl_perfect match |
| vvi miR-1729 nat as <br>vvi miR-1729 2mut as | tgacagaagagagtgagcac<br>tgaccgaagagagcgagcac     | probe<br>vvi-miR156b compl_mismatch probe<br>vvi-miR156e compl_perfect match |
| vvi miR-1730 nat as <br>vvi miR-1730 2mut as | tgacagaggagagtgagcac<br>tgacagagaagagcgagcac     | probe<br>vvi-miR156e compl_mismatch probe<br>vvi-miR156f compl_perfect match |
| vvi miR-1731 nat as <br>vvi miR-1731 2mut as | ttgacagaagatagagagcac<br>ttgaaagaagatagagcgcac   | probe<br>vvi-miR156f compl_mismatch probe<br>vvi-miR156h compl_perfect match |
| vvi miR-1732 nat as <br>vvi miR-1732 2mut as | tgacagaagagagagagcat<br>tgaccgaagagagagcgcat     | probe<br>vvi-miR156h compl_mismatch probe<br>vvi-miR156i compl_perfect match |
| vvi miR-1733 nat as <br>vvi miR-1733 2mut as | tgacagaagatagagagcac<br>tgaccgaagatagagcgcac     | probe<br>vvi-miR156i compl_mismatch probe<br>vvi-miR159a compl_perfect match |
| vvi miR-1734 nat as <br>vvi miR-1734 2mut as | cttggagtgaagggagctctc<br>cttgaagtgaagtgagctctc   | probe<br>vvi-miR159a compl_mismatch probe<br>vvi-miR159b compl_perfect match |
| vvi miR-1735 nat as <br>vvi miR-1735 2mut as | cttggagtgaagggagctctca<br>cttgaagtgaagtgagctctca | probe<br>vvi-miR159b compl_mismatch probe<br>vvi-miR159c compl_perfect match |
| vvi miR-1736 nat as                          | tttgattgaagggagctctca                            | probe                                                                        |

|                      |                        |                                  |
|----------------------|------------------------|----------------------------------|
| vvi miR-1736 2mut as | tttgaattgaagtgagctcta  | vvi-miR159c compl_mismatch probe |
| vvi miR-1737 nat as  | tgccctggctccctgaatgcca | vvi-miR160a compl_perfect match  |
| vvi miR-1737 2mut as | tgccctgcctccttgaatgcca | probe                            |
| vvi miR-1738 nat as  | tgccctggctccctgtatgcca | vvi-miR160a compl_mismatch probe |
| vvi miR-1738 2mut as | tgccctgcctccttgtatgcca | vvi-miR160c compl_perfect match  |
| vvi miR-1739 nat as  | tcgataaacctctgcatccag  | probe                            |
| vvi miR-1739 2mut as | tcgataaatctctgaatccag  | vvi-miR160c compl_mismatch probe |
| vvi miR-1740 nat as  | tggagaagcagggcacgtgca  | vvi-miR162 compl_perfect match   |
| vvi miR-1740 2mut as | tggagaagaaggccacgtgca  | probe                            |
| vvi miR-1741 nat as  | tggagaagcagggcacatgct  | vvi-miR162 compl_mismatch probe  |
| vvi miR-1741 2mut as | tggagaagaaggccacatgct  | vvi-miR164a compl_perfect match  |
| vvi miR-1742 nat as  | tcggaccaggcttcattccccc | probe                            |
| vvi miR-1742 2mut as | tcggaccagccttcattccccc | vvi-miR164a compl_mismatch probe |
| vvi miR-1743 nat as  | tcggaccaggcttcattccct  | vvi-miR164b compl_perfect match  |
| vvi miR-1743 2mut as | tcggaccagccttcattccct  | probe                            |
| vvi miR-1744 nat as  | tcggaccaggcttcattcctg  | vvi-miR164b compl_mismatch probe |
| vvi miR-1744 2mut as | tcggaccagccttaattcctg  | vvi-miR166c compl_perfect match  |
| vvi miR-1745 nat as  | tcggaccaggcttcattcctc  | probe                            |
| vvi miR-1745 2mut as | tcggaccagccttaattcctc  | vvi-miR166c compl_mismatch probe |
| vvi miR-1746 nat as  | tgaagctgccagcatgatctg  | vvi-miR166d compl_perfect match  |
| vvi miR-1746 2mut as | tgaagctgtcagaatgatctg  | probe                            |
| vvi miR-1747 nat as  | tgaagctgccagcatgatcta  | vvi-miR166d compl_mismatch probe |
| vvi miR-1747 2mut as | tgaagctgtcagaatgatcta  | vvi-miR166a compl_perfect match  |
|                      |                        | probe                            |
|                      |                        | vvi-miR167a compl_perfect match  |
|                      |                        | probe                            |
|                      |                        | vvi-miR167a compl_mismatch probe |
|                      |                        | vvi-miR167b compl_perfect match  |
|                      |                        | probe                            |
|                      |                        | vvi-miR167b compl_mismatch probe |

|                      |                        |                                       |
|----------------------|------------------------|---------------------------------------|
| vvi miR-1748 nat as  | tgaagctgccagcatgatct   | vvi-miR167c compl_perfect match probe |
| vvi miR-1748 2mut as | tgaagctgtcagaatgatct   | vvi-miR167c compl_mismatch probe      |
| vvi miR-1749 nat as  | tcgcttggtgcaggtcgggaa  | vvi-miR168 compl_perfect match probe  |
| vvi miR-1749 2mut as | tcgcttggtgaaggtcaggaa  | vvi-miR168 compl_mismatch probe       |
| vvi miR-1750 nat as  | cagccaaggatgacttgccgg  | vvi-miR169a compl_perfect match probe |
| vvi miR-1750 2mut as | cagcaaaggatgacttcccgg  | vvi-miR169a compl_mismatch probe      |
| vvi miR-1751 nat as  | tagcgaaggatgactgccta   | vvi-miR169y compl_perfect match probe |
| vvi miR-1751 2mut as | tagcaaaggatgacttcccta  | vvi-miR169y compl_mismatch probe      |
| vvi miR-1752 nat as  | tgagccaaggatggcttgccg  | vvi-miR169b compl_perfect match probe |
| vvi miR-1752 2mut as | tgagtcaaggatgccttgccg  | vvi-miR169b compl_mismatch probe      |
| vvi miR-1753 nat as  | cagccaagaatgatttgccgg  | vvi-miR169d compl_perfect match probe |
| vvi miR-1753 2mut as | cagcaaagaatgatttcccgg  | vvi-miR169d compl_mismatch probe      |
| vvi miR-1754 nat as  | tagccaaggatgacttgccctg | vvi-miR169e compl_perfect match probe |
| vvi miR-1754 2mut as | tagcaaaggatgacttccctg  | vvi-miR169e compl_mismatch probe      |
| vvi miR-1755 nat as  | cagccaaggatgacttgccga  | vvi-miR169f compl_perfect match probe |
| vvi miR-1755 2mut as | cagcaaaggatgacttcccga  | vvi-miR169f compl_mismatch probe      |
| vvi miR-1756 nat as  | cagccaaggatgacttgcc    | vvi-miR169g compl_perfect match probe |
| vvi miR-1756 2mut as | cagcaaaggatgccttgcc    | vvi-miR169g compl_mismatch probe      |
| vvi miR-1757 nat as  | gagccaaggatgactggccgt  | vvi-miR169i compl_perfect match probe |
| vvi miR-1757 2mut as | gagcaaaggatgactgcccgt  | vvi-miR169i compl_mismatch probe      |
| vvi miR-1758 nat as  | gagccaaggatgacttgccgt  | vvi-miR169l compl_perfect match probe |
| vvi miR-1758 2mut as | gagcaaaggatgacttcccgt  | vvi-miR169l compl_mismatch probe      |
| vvi miR-1759 nat as  | gagccaaggatgacttgccgg  | vvi-miR169m compl_perfect match probe |

|                      |                         |                                                                              |
|----------------------|-------------------------|------------------------------------------------------------------------------|
| vvi miR-1759 2mut as | gagcaaaggatgacttcccgg   | probe<br>vvi-miR169m compl_mismatch probe<br>vvi-miR169o compl_perfect match |
| vvi miR-1760 nat as  | gagccaaggatgacttgccgc   | probe                                                                        |
| vvi miR-1760 2mut as | gagcaaaggatgacttcccgc   | vvi-miR169o compl_mismatch probe<br>vvi-miR169r compl_perfect match          |
| vvi miR-1761 nat as  | tgagtcaaggatgacttgccg   | probe                                                                        |
| vvi miR-1761 2mut as | tgagtcaagaatgccttgccg   | vvi-miR169r compl_mismatch probe<br>vvi-miR169t compl_perfect match          |
| vvi miR-1762 nat as  | cgagtcaaggatgacttgccg   | probe                                                                        |
| vvi miR-1762 2mut as | cgagtcaagaatgccttgccg   | vvi-miR169t compl_mismatch probe<br>vvi-miR169v compl_perfect match          |
| vvi miR-1763 nat as  | aagccaaggatgaattgccgg   | probe                                                                        |
| vvi miR-1763 2mut as | aagcaaaggatgaattcccgg   | vvi-miR169v compl_mismatch probe<br>vvi-miR169x compl_perfect match          |
| vvi miR-1764 nat as  | tagccaaggatgacttgcccta  | probe                                                                        |
| vvi miR-1764 2mut as | tagcaaaggatgacttcccta   | vvi-miR169x compl_mismatch probe<br>vvi-miR171a compl_perfect match          |
| vvi miR-1765 nat as  | ttgagccgtccaacatcacg    | probe                                                                        |
| vvi miR-1765 2mut as | ttgagtcgtccaacatcacg    | vvi-miR171a compl_mismatch probe<br>vvi-miR171b compl_perfect match          |
| vvi miR-1766 nat as  | tgattgagccgcgccaatatac  | probe                                                                        |
| vvi miR-1766 2mut as | tgattgagcccagtcgaatatac | vvi-miR171b compl_mismatch probe<br>vvi-miR171c compl_perfect match          |
| vvi miR-1767 nat as  | ttgagccgtgccaatatacag   | probe                                                                        |
| vvi miR-1767 2mut as | ttgagccgtgtaaatatacag   | vvi-miR171c compl_mismatch probe<br>vvi-miR171e compl_perfect match          |
| vvi miR-1768 nat as  | tgattgagccgcgccaatatac  | probe                                                                        |
| vvi miR-1768 2mut as | tgattgagccccccaatatac   | vvi-miR171e compl_mismatch probe<br>vvi-miR171f compl_perfect match          |
| vvi miR-1769 nat as  | ttgagccgcgccaatatacact  | probe                                                                        |
| vvi miR-1769 2mut as | ttgagccgccccaaatatacact | vvi-miR171f compl_mismatch probe<br>vvi-miR171g compl_perfect match          |
| vvi miR-1770 nat as  | ttgagccgaaccaatatacacc  | probe                                                                        |

|                      |                       |                                  |
|----------------------|-----------------------|----------------------------------|
| vvi miR-1770 2mut as | ttgagtccaacaatatcacc  | vvi-miR171g compl_mismatch probe |
| vvi miR-1771 nat as  | tggttgagccgcgccaatc   | vvi-miR171h compl_perfect match  |
| vvi miR-1771 2mut as | tggttgagccccccaatc    | probe                            |
| vvi miR-1772 nat as  | ttgagccgtgccaatc      | vvi-miR171h compl_mismatch probe |
| vvi miR-1772 2mut as | ttgagccgtgtaaatc      | vvi-miR171i compl_perfect match  |
| vvi miR-1773 nat as  | tgaatcttgatgatgctacat | probe                            |
| vvi miR-1773 2mut as | tgaatcttaatgatcctacat | vvi-miR171i compl_mismatch probe |
| vvi miR-1774 nat as  | tgaatcttgatgatgctacac | vvi-miR172a compl_perfect match  |
| vvi miR-1774 2mut as | tgaatcttaatgatcctacac | probe                            |
| vvi miR-1775 nat as  | ggaatcttgatgatgctgcag | vvi-miR172a compl_mismatch probe |
| vvi miR-1775 2mut as | ggaatcttaatgatcctgcag | vvi-miR172b compl_perfect match  |
| vvi miR-1776 nat as  | agaatcttgatgatgctgcat | probe                            |
| vvi miR-1776 2mut as | agaatcttaatgatcctgcat | vvi-miR172b compl_mismatch probe |
| vvi miR-1777 nat as  | cttgactgaaggagctccc   | vvi-miR172c compl_perfect match  |
| vvi miR-1777 2mut as | cttgaactgaagtgcctccc  | probe                            |
| vvi miR-1778 nat as  | tttgactgaaggagctcct   | vvi-miR172c compl_mismatch probe |
| vvi miR-1778 2mut as | tttgaactgaagtgcctcct  | vvi-miR172d compl_perfect match  |
| vvi miR-1779 nat as  | attggactgaaggagctccc  | probe                            |
| vvi miR-1779 2mut as | attgaactgaagtgcctccc  | vvi-miR172d compl_mismatch probe |
| vvi miR-1780 nat as  | aagctcaggaggatagcgcc  | vvi-miR319b compl_perfect match  |
| vvi miR-1780 2mut as | aagctcagaagtgatagcgcc | probe                            |
| vvi miR-1781 nat as  | tccaaaggatcgattgatcc  | vvi-miR319b compl_mismatch probe |
| vvi miR-1781 2mut as | tccaaagtgatccattgatcc | vvi-miR319e compl_perfect match  |
|                      |                       | probe                            |
|                      |                       | vvi-miR319g compl_perfect match  |
|                      |                       | probe                            |
|                      |                       | vvi-miR319g compl_mismatch probe |
|                      |                       | vvi-miR390 compl_perfect match   |
|                      |                       | probe                            |
|                      |                       | vvi-miR390 compl_mismatch probe  |
|                      |                       | vvi-miR393a compl_perfect match  |
|                      |                       | probe                            |
|                      |                       | vvi-miR393a compl_mismatch probe |

|                      |                        |                                       |
|----------------------|------------------------|---------------------------------------|
| vvi miR-1782 nat as  | ttggcattctgtccacctcc   | vvi-miR394a compl_perfect match probe |
| vvi miR-1782 2mut as | ttggaattctgtcaacctcc   | vvi-miR394a compl_mismatch probe      |
| vvi miR-1783 nat as  | ctgaagtgtttgggggaactc  | vvi-miR395a compl_perfect match probe |
| vvi miR-1783 2mut as | ctgaagcgtttgggtgaactc  | vvi-miR395a compl_mismatch probe      |
| vvi miR-1784 nat as  | ctgaagagtctggaggaactc  | vvi-miR395n compl_perfect match probe |
| vvi miR-1784 2mut as | ctgaagagcctcgaggaactc  | vvi-miR395n compl_mismatch probe      |
| vvi miR-1785 nat as  | ctcccacagctttcttgagctt | vvi-miR396a compl_perfect match probe |
| vvi miR-1785 2mut as | ctcccacagttttcttaagctt | vvi-miR396a compl_mismatch probe      |
| vvi miR-1786 nat as  | ttcccacagctttcttgaactt | vvi-miR396b compl_perfect match probe |
| vvi miR-1786 2mut as | ttcccacagttttcttaaactt | vvi-miR396b compl_mismatch probe      |
| vvi miR-1787 nat as  | ttccacagctttcttgaactg  | vvi-miR396c compl_perfect match probe |
| vvi miR-1787 2mut as | ttccacagttttcttaaactg  | vvi-miR396c compl_mismatch probe      |
| vvi miR-1788 nat as  | tcattgagtgcagcgttgatg  | vvi-miR397a compl_perfect match probe |
| vvi miR-1788 2mut as | tcattgagtgaagagttgatg  | vvi-miR397a compl_mismatch probe      |
| vvi miR-1789 nat as  | tgtgttctcaggtcaccctt   | vvi-miR398a compl_perfect match probe |
| vvi miR-1789 2mut as | tgtgttctcacgtcactcctt  | vvi-miR398a compl_mismatch probe      |
| vvi miR-1790 nat as  | tgtgttctcaggtcgcccctg  | vvi-miR398b compl_perfect match probe |
| vvi miR-1790 2mut as | tgtgttctcacgtccccctg   | vvi-miR398b compl_mismatch probe      |
| vvi miR-1791 nat as  | tgccaaaggagaattgccctg  | vvi-miR399a compl_perfect match probe |
| vvi miR-1791 2mut as | tgccaaagaagaattgtcctg  | vvi-miR399a compl_mismatch probe      |
| vvi miR-1792 nat as  | tgccaaaggagagttgccctg  | vvi-miR399b compl_perfect match probe |
| vvi miR-1792 2mut as | tgccaaagaagagttgtcctg  | vvi-miR399b compl_mismatch probe      |
| vvi miR-1793 nat as  | tgccaaaggagatttgctcgt  | vvi-miR399d compl_perfect match       |

|                                              |                                                  |                                                                                       |
|----------------------------------------------|--------------------------------------------------|---------------------------------------------------------------------------------------|
| vvi miR-1793 2mut as                         | tgccaaagaagatttcctcg                             | probe<br>vvi-miR399d compl_mismatch probe<br>vvi-miR399e compl_perfect match<br>probe |
| vvi miR-1794 nat as <br>vvi miR-1794 2mut as | tgccaaaggagattgcccg<br>tgccaaagaagattgtccgg      | vvi-miR399e compl_mismatch probe<br>vvi-miR399f compl_perfect match<br>probe          |
| vvi miR-1795 nat as <br>vvi miR-1795 2mut as | tgccgaaggagattgtcctg<br>tgccaaaggagatttctcctg    | vvi-miR399f compl_mismatch probe<br>vvi-miR399g compl_perfect match<br>probe          |
| vvi miR-1796 nat as <br>vvi miR-1796 2mut as | tgccaaaggagattgccct<br>tgccaaagaagattgtccct      | vvi-miR399g compl_mismatch probe<br>vvi-miR399i compl_perfect match<br>probe          |
| vvi miR-1797 nat as <br>vvi miR-1797 2mut as | cgccaaaggagagttgccctg<br>cgccaaagaagagttgtcctg   | vvi-miR399i compl_mismatch probe<br>vvi-miR403a compl_perfect match<br>probe          |
| vvi miR-1798 nat as <br>vvi miR-1798 2mut as | ttagattcacgcacaaactcg<br>ttagattcaccaacaaactcg   | vvi-miR403a compl_mismatch probe<br>vvi-miR408 compl_perfect match<br>probe           |
| vvi miR-1799 nat as <br>vvi miR-1799 2mut as | atgcactgcctcttcctggc<br>atgcactgtctcttctctggc    | vvi-miR408 compl_mismatch probe<br>vvi-miR477a compl_perfect match<br>probe           |
| vvi miR-1800 nat as <br>vvi miR-1800 2mut as | atctccctcaaaggcttccaa<br>atctctctcaaagccttccaa   | vvi-miR477a compl_mismatch probe<br>vvi-miR479 compl_perfect match<br>probe           |
| vvi miR-1801 nat as <br>vvi miR-1801 2mut as | tgtggtattggttcggctcatc<br>tgtggtattcgttcgcctcatc | vvi-miR479 compl_mismatch probe<br>vvi-miR482a compl_perfect match<br>probe           |
| vvi miR-1802 nat as <br>vvi miR-1802 2mut as | cctactcctccattcc<br>cctacttctctcattcc            | vvi-miR482a compl_mismatch probe<br>vvi-miR535a compl_perfect match<br>probe          |
| vvi miR-1803 nat as <br>vvi miR-1803 2mut as | tgacaacgagagagagcacgct<br>tgacaaagagagagagaacgct | vvi-miR535a compl_mismatch probe<br>vvi-miR828a compl_perfect match<br>probe          |
| vvi miR-1804 nat as                          | tcttgctcaaagtattccca                             |                                                                                       |

|                      |                        |                                        |
|----------------------|------------------------|----------------------------------------|
| vvi miR-1804 2mut as | tcttctcaaataagtattcca  | vvi-miR828a compl_mismatch probe       |
| vvi miR-1805 nat as  | tcttgctcaaatgagtgtcca  | vvi-miR828b compl_perfect match probe  |
| vvi miR-1805 2mut as | tcttctcaaatagagcgtcca  | vvi-miR828b compl_mismatch probe       |
| vvi miR-1806 nat as  | tagctctgataccaattgata  | vvi-miR845a compl_perfect match probe  |
| vvi miR-1806 2mut as | tagctccgatacaaatgata   | vvi-miR845a compl_mismatch probe       |
| vvi miR-1807 nat as  | aggctctgataccaattgatg  | vvi-miR845c compl_perfect match probe  |
| vvi miR-1807 2mut as | aggctccgatacaaatgatg   | vvi-miR845c compl_mismatch probe       |
| vvi miR-1808 nat as  | tggctctgataccaattgatg  | vvi-miR845d compl_perfect match probe  |
| vvi miR-1808 2mut as | tggctccgatacaaatgatg   | vvi-miR845d compl_mismatch probe       |
| vvi miR-1809 nat as  | gtgctctctcttctctgtca   | vvi-miR156a *compl_perfect match probe |
| vvi miR-1809 2mut as | gtgctctcccttcttccgtca  | vvi-miR156a *compl_mismatch probe      |
| vvi miR-1810 nat as  | gtgctcattctcttctgtca   | vvi-miR156b *compl_perfect match probe |
| vvi miR-1810 2mut as | gtgctaatttcttcttccgtca | vvi-miR156b *compl_mismatch probe      |
| vvi miR-1811 nat as  | gtgctcactctctatctgtca  | vvi-miR156c *compl_perfect match probe |
| vvi miR-1811 2mut as | gtgctccctctctatccgtca  | vvi-miR156c *compl_mismatch probe      |
| vvi miR-1812 nat as  | gtgctcacctctcttctgtca  | vvi-miR156d *compl_perfect match probe |
| vvi miR-1812 2mut as | gtgctcatctcttcttccgtca | vvi-miR156d *compl_mismatch probe      |
| vvi miR-1813 nat as  | gtgcttactccctatctgtca  | vvi-miR156e *compl_perfect match probe |
| vvi miR-1813 2mut as | gtgcttactcttctatctgtca | vvi-miR156e *compl_mismatch probe      |
| vvi miR-1814 nat as  | gtcctctctcttctctgtcaa  | vvi-miR156f *compl_perfect match       |

|                      |                        |                                            |
|----------------------|------------------------|--------------------------------------------|
| vvi miR-1814 2mut as | gtcctctccccttctctgtcaa | probe<br>vvi-miR156f *compl_mismatch probe |
| vvi miR-1815 nat as  | gtgctctctagacttctgtca  | vvi-miR156g *compl_perfect match<br>probe  |
| vvi miR-1815 2mut as | gtgctccctagccttctgtca  | vvi-miR156g *compl_mismatch<br>probe       |
| vvi miR-1816 nat as  | gttctttctgcgcctttca    | vvi-miR156h *compl_perfect match<br>probe  |
| vvi miR-1816 2mut as | gttctttctccccctttca    | vvi-miR156h *compl_mismatch<br>probe       |
| vvi miR-1817 nat as  | gtgctctctattcttctgtca  | vvi-miR156i *compl_perfect match<br>probe  |
| vvi miR-1817 2mut as | gtgctccctattcttccgtca  | vvi-miR156i *compl_mismatch probe          |
| vvi miR-1818 nat as  | gggagctcctttacgtccag   | vvi-miR159a *compl_perfect match<br>probe  |
| vvi miR-1818 2mut as | gggagttcctttaccctccag  | vvi-miR159a *compl_mismatch<br>probe       |
| vvi miR-1819 nat as  | tgggagcttctttacactccag | vvi-miR159b *compl_perfect match<br>probe  |
| vvi miR-1819 2mut as | tgggagtttctttaccctccag | vvi-miR159b *compl_mismatch<br>probe       |
| vvi miR-1820 nat as  | tggagctccttgaagtccaa   | vvi-miR159c *compl_perfect match<br>probe  |
| vvi miR-1820 2mut as | tggagttccttgaagccaa    | vvi-miR159c *compl_mismatch<br>probe       |
| vvi miR-1821 nat as  | tggcatcagaggagtcagca   | vvi-miR160a *compl_perfect match<br>probe  |
| vvi miR-1821 2mut as | tggcatcagacaagtcagca   | vvi-miR160a *compl_mismatch<br>probe       |
| vvi miR-1822 nat as  | tggcatgaggggagtcagca   | vvi-miR160b *compl_perfect match<br>probe  |
| vvi miR-1822 2mut as | tggcatgaggttaagtcagca  | vvi-miR160b *compl_mismatch<br>probe       |
| vvi miR-1823 nat as  | tggcgtgcgaggagccaagca  | vvi-miR160c *compl_perfect match           |

|                      |                        |                                            |
|----------------------|------------------------|--------------------------------------------|
| vvi miR-1823 2mut as | tggcgtgagaggagtcaagca  | probe<br>vvi-miR160c *compl_mismatch       |
| vvi miR-1824 nat as  | tggcgtgcgaggagccatgca  | probe<br>vvi-miR160d *compl_perfect match  |
| vvi miR-1824 2mut as | tggcgtgagaggagtcatgca  | probe<br>vvi-miR160d *compl_mismatch       |
| vvi miR-1825 nat as  | tggcatgaggggagtcaagca  | probe<br>vvi-miR160e *compl_perfect match  |
| vvi miR-1825 2mut as | tggcatgaggttaagtcaagca | probe<br>vvi-miR160e *compl_mismatch       |
| vvi miR-1826 nat as  | tggcgtatgaggagccatgca  | probe<br>vvi-miR160f *compl_perfect match  |
| vvi miR-1826 2mut as | tggcctatgaggagtcatgca  | probe<br>vvi-miR160f *compl_mismatch probe |
| vvi miR-1827 nat as  | ctggatgcagcggttcatcga  | probe<br>vvi-miR162 *compl_perfect match   |
| vvi miR-1827 2mut as | ctggatgcagaagttcatcga  | probe<br>vvi-miR162 *compl_mismatch probe  |
| vvi miR-1828 nat as  | gcacgtgctcccccttctcca  | probe<br>vvi-miR164a *compl_perfect match  |
| vvi miR-1828 2mut as | gcacgtcctcctcttctcca   | probe<br>vvi-miR164a *compl_mismatch       |
| vvi miR-1829 nat as  | catgtgccctggctctcc     | probe<br>vvi-miR164b *compl_perfect match  |
| vvi miR-1829 2mut as | catgtgtcctgcctctcc     | probe<br>vvi-miR164b *compl_mismatch       |
| vvi miR-1830 nat as  | tgcacgtgctcccccttctcca | probe<br>vvi-miR164d *compl_perfect match  |
| vvi miR-1830 2mut as | tgcacgtcctcctcttctcca  | probe<br>vvi-miR164d *compl_mismatch       |
| vvi miR-1831 nat as  | ggggaatgtgtctggctcga   | probe<br>vvi-miR166c *compl_perfect match  |
| vvi miR-1831 2mut as | ggggaatgttctctgcctcga  | probe<br>vvi-miR166c *compl_mismatch       |
| vvi miR-1832 nat as  | aggggattgtgtctggctcga  | probe<br>vvi-miR166d *compl_perfect match  |

|                      |                       |                                            |
|----------------------|-----------------------|--------------------------------------------|
| vvi miR-1832 2mut as | agggaattgttctgcctcga  | probe<br>vvi-miR166d *compl_mismatch       |
| vvi miR-1833 nat as  | ggggaatgttctggctcga   | probe<br>vvi-miR166e *compl_perfect match  |
| vvi miR-1833 2mut as | ggggaatgttctgcctcga   | probe<br>vvi-miR166e *compl_mismatch       |
| vvi miR-1834 nat as  | ggggaatgttgctggctcga  | probe<br>vvi-miR166f *compl_perfect match  |
| vvi miR-1834 2mut as | ggggaatgttcgctgcctcga | probe<br>vvi-miR166f *compl_mismatch probe |
| vvi miR-1835 nat as  | aggggaatgttctggttcga  | probe<br>vvi-miR166g *compl_perfect match  |
| vvi miR-1835 2mut as | agggaaatgttctcgttcga  | probe<br>vvi-miR166g *compl_mismatch       |
| vvi miR-1836 nat as  | ggggaacgctgtcgttcga   | probe<br>vvi-miR166h *compl_perfect match  |
| vvi miR-1836 2mut as | ggggaaccctgtcgttcga   | probe<br>vvi-miR166h *compl_mismatch       |
| vvi miR-1837 nat as  | ttggaatgaggttgatccaa  | probe<br>vvi-miR166a *compl_perfect match  |
| vvi miR-1837 2mut as | ttggaatgagctttaatccaa | probe<br>vvi-miR166a *compl_mismatch       |
| vvi miR-1838 nat as  | ggggaatgttgctggctcga  | probe<br>vvi-miR166b *compl_perfect match  |
| vvi miR-1838 2mut as | ggggaatgttcgctgcctcga | probe<br>vvi-miR166b *compl_mismatch       |
| vvi miR-1839 nat as  | caggtcatcttcagcttca   | probe<br>vvi-miR167a *compl_perfect match  |
| vvi miR-1839 2mut as | caggccatctgaagcttca   | probe<br>vvi-miR167a *compl_mismatch       |
| vvi miR-1840 nat as  | tagatcatgtggcagttca   | probe<br>vvi-miR167b *compl_perfect match  |
| vvi miR-1840 2mut as | tagatcatgcgccagttca   | probe<br>vvi-miR167b *compl_mismatch       |

|                      |                         |                                        |
|----------------------|-------------------------|----------------------------------------|
| vvi miR-1841 nat as  | agatcatgtggtagcctca     | vvi-miR167c *compl_perfect match probe |
| vvi miR-1841 2mut as | agatcatgtcgtagtctca     | vvi-miR167c *compl_mismatch probe      |
| vvi miR-1842 nat as  | taggtcatgccctgacagcctca | vvi-miR167d *compl_perfect match probe |
| vvi miR-1842 2mut as | taggtcatgtcctgacagtctca | vvi-miR167d *compl_mismatch probe      |
| vvi miR-1843 nat as  | agatcatgtggcagtttca     | vvi-miR167e *compl_perfect match probe |
| vvi miR-1843 2mut as | agatcatgtcccagtttca     | vvi-miR167e *compl_mismatch probe      |
| vvi miR-1844 nat as  | tccgccttgcatcaactga     | vvi-miR168 *compl_perfect match probe  |
| vvi miR-1844 2mut as | tcccccttgaatcaactga     | vvi-miR168 *compl_mismatch probe       |
| vvi miR-1845 nat as  | ctggcaagttgccttggt      | vvi-miR169a *compl_perfect match probe |
| vvi miR-1845 2mut as | ctggaaagttgttcttggt     | vvi-miR169a *compl_mismatch probe      |
| vvi miR-1846 nat as  | ggcaagtctccttgga        | vvi-miR169y *compl_perfect match probe |
| vvi miR-1846 2mut as | ggcaagccttcttgga        | vvi-miR169y *compl_mismatch probe      |
| vvi miR-1847 nat as  | cggtagtcatccttggtc      | vvi-miR169b *compl_perfect match probe |
| vvi miR-1847 2mut as | cggtagccatccttggtc      | vvi-miR169b *compl_mismatch probe      |
| vvi miR-1848 nat as  | ccggcaagttgccttggt      | vvi-miR169c *compl_perfect match probe |
| vvi miR-1848 2mut as | ccggaaagttgttcttggt     | vvi-miR169c *compl_mismatch probe      |
| vvi miR-1849 nat as  | ctggcaagttgccttggt      | vvi-miR169d *compl_perfect match probe |
| vvi miR-1849 2mut as | ctggaaagttgttcttggt     | vvi-miR169d *compl_mismatch probe      |

|                      |                           |                                            |
|----------------------|---------------------------|--------------------------------------------|
| vvi miR-1850 nat as  | caggcagtcaccttgctaa       | probe<br>vvi-miR169e *compl_perfect match  |
| vvi miR-1850 2mut as | caggaagtcacctgcctaa       | probe<br>vvi-miR169e *compl_mismatch       |
| vvi miR-1851 nat as  | ggcaagttgtttggct          | probe<br>vvi-miR169f *compl_perfect match  |
| vvi miR-1851 2mut as | ggcaagttccgttggct         | probe<br>vvi-miR169f *compl_mismatch probe |
| vvi miR-1852 nat as  | ggcaagttgtcttggct         | probe<br>vvi-miR169g *compl_perfect match  |
| vvi miR-1852 2mut as | ggcaagttcccttggct         | probe<br>vvi-miR169g *compl_mismatch       |
| vvi miR-1853 nat as  | cggagggttatcctgactc       | probe<br>vvi-miR169h *compl_perfect match  |
| vvi miR-1853 2mut as | cggagtgtattctgactc        | probe<br>vvi-miR169h *compl_mismatch       |
| vvi miR-1854 nat as  | acggctggtatccctgtctc      | probe<br>vvi-miR169i *compl_perfect match  |
| vvi miR-1854 2mut as | acggttggttatctctgtctc     | probe<br>vvi-miR169i *compl_mismatch probe |
| vvi miR-1855 nat as  | ctggcaggtgtccttggct       | probe<br>vvi-miR169j *compl_perfect match  |
| vvi miR-1855 2mut as | ctggaaggtgttcttggct       | probe<br>vvi-miR169j *compl_mismatch probe |
| vvi miR-1856 nat as  | ctggcaggtgtccttggct       | probe<br>vvi-miR169k *compl_perfect match  |
| vvi miR-1856 2mut as | ctggaaggtgttcttggct       | probe<br>vvi-miR169k *compl_mismatch       |
| vvi miR-1857 nat as  | acggctagttattcttggctc     | probe<br>vvi-miR169l *compl_perfect match  |
| vvi miR-1857 2mut as | acggttagttattcttggctc     | probe<br>vvi-miR169l *compl_mismatch probe |
| vvi miR-1858 nat as  | ctggcaagcatccaggctc       | probe<br>vvi-miR169m *compl_perfect match  |
| vvi miR-1858 2mut as | ctggcaagaatcaggctc        | probe<br>vvi-miR169m *compl_mismatch       |
| vvi miR-1859 nat as  | cataactggcaagcatctgaggctc | probe<br>vvi-miR169n *compl_perfect match  |

|                      |                           |                                            |
|----------------------|---------------------------|--------------------------------------------|
| vvi miR-1859 2mut as | cataactgccaagaatctgaggctc | probe<br>vvi-miR169n *compl_mismatch       |
| vvi miR-1860 nat as  | gacagcgagttattcttgctc     | probe<br>vvi-miR169o *compl_perfect match  |
| vvi miR-1860 2mut as | gacagagagttattctcgctc     | probe<br>vvi-miR169o *compl_mismatch       |
| vvi miR-1861 nat as  | ctggcaagcatccgaggctc      | probe<br>vvi-miR169p *compl_perfect match  |
| vvi miR-1861 2mut as | ctggcaagaatcagaggctc      | probe<br>vvi-miR169p *compl_mismatch       |
| vvi miR-1862 nat as  | ccggcatgtaatcctggctc      | probe<br>vvi-miR169q *compl_perfect match  |
| vvi miR-1862 2mut as | ccggaatgtaatcctcgctc      | probe<br>vvi-miR169q *compl_mismatch       |
| vvi miR-1863 nat as  | cggcaagttgacttgactca      | probe<br>vvi-miR169r *compl_perfect match  |
| vvi miR-1863 2mut as | cggcaagttaacttgctca       | probe<br>vvi-miR169r *compl_mismatch probe |
| vvi miR-1864 nat as  | ccggcaagttgttctggct       | probe<br>vvi-miR169s *compl_perfect match  |
| vvi miR-1864 2mut as | ccggaaagttgttctggct       | probe<br>vvi-miR169s *compl_mismatch       |
| vvi miR-1865 nat as  | cggcaagttgacttgactc       | probe<br>vvi-miR169t *compl_perfect match  |
| vvi miR-1865 2mut as | cggcaagttaccttgactc       | probe<br>vvi-miR169t *compl_mismatch probe |
| vvi miR-1866 nat as  | cggcaagttgacttgactc       | probe<br>vvi-miR169u *compl_perfect match  |
| vvi miR-1866 2mut as | cggcaagttaccttgactc       | probe<br>vvi-miR169u *compl_mismatch       |
| vvi miR-1867 nat as  | tcggcaatttattcttgct       | probe<br>vvi-miR169v *compl_perfect match  |
| vvi miR-1867 2mut as | tcggaaatttatttttgct       | probe<br>vvi-miR169v *compl_mismatch       |
| vvi miR-1868 nat as  | tcggcgagtcattcttagct      | probe<br>vvi-miR169w *compl_perfect match  |

|                      |                        |                                           |
|----------------------|------------------------|-------------------------------------------|
| vvi miR-1868 2mut as | tcggagagtcatttttagct   | probe<br>vvi-miR169w *compl_mismatch      |
| vvi miR-1869 nat as  | taggcagtcattccttcggcta | probe<br>vvi-miR169x *compl_perfect match |
| vvi miR-1869 2mut as | taggaagtcattccttcagcta | probe<br>vvi-miR169x *compl_mismatch      |
| vvi miR-1870 nat as  | catgatattggcacggctcaa  | probe<br>vvi-miR171a *compl_perfect match |
| vvi miR-1870 2mut as | catgatattgccacgcctcaa  | probe<br>vvi-miR171a *compl_mismatch      |
| vvi miR-1871 nat as  | ggtattggcgtgcctcaatt   | probe<br>vvi-miR171b *compl_perfect match |
| vvi miR-1871 2mut as | ggtattggagtgctcaatt    | probe<br>vvi-miR171b *compl_mismatch      |
| vvi miR-1872 nat as  | cgggatattggtgcggttcaa  | probe<br>vvi-miR171c *compl_perfect match |
| vvi miR-1872 2mut as | cgggatattcgtgaggttcaa  | probe<br>vvi-miR171c *compl_mismatch      |
| vvi miR-1873 nat as  | cgagatattgatacgggtcaa  | probe<br>vvi-miR171d *compl_perfect match |
| vvi miR-1873 2mut as | cgagatattaatacagttcaa  | probe<br>vvi-miR171d *compl_mismatch      |
| vvi miR-1874 nat as  | gatgttggtgaggttcaatc   | probe<br>vvi-miR171e *compl_perfect match |
| vvi miR-1874 2mut as | gatgttcgtgagcttcaatc   | probe<br>vvi-miR171e *compl_mismatch      |
| vvi miR-1875 nat as  | agcgatgttggtgaggttcaa  | probe<br>vvi-miR171f *compl_perfect match |
| vvi miR-1875 2mut as | agcgatgttcgtgagcttcaa  | probe<br>vvi-miR171f *compl_mismatch      |
| vvi miR-1876 nat as  | atgttggtccatcgg        | probe<br>vvi-miR171g *compl_perfect match |
| vvi miR-1876 2mut as | atgttcgttcaatcgg       | probe<br>vvi-miR171g *compl_mismatch      |

|                      |                       |                                        |
|----------------------|-----------------------|----------------------------------------|
| vvi miR-1877 nat as  | gatgttggtgcggttcaacc  | vvi-miR171h *compl_perfect match probe |
| vvi miR-1877 2mut as | gatgttggtcaggttcaacc  | vvi-miR171h *compl_mismatch probe      |
| vvi miR-1878 nat as  | ggggatgttggaatggctcaa | vvi-miR171i *compl_perfect match probe |
| vvi miR-1878 2mut as | ggggatgttcgaatgcctcaa | vvi-miR171i *compl_mismatch probe      |
| vvi miR-1879 nat as  | atgcagcatcatcaagattc  | vvi-miR172a *compl_perfect match probe |
| vvi miR-1879 2mut as | atgcagaatcataaagattc  | vvi-miR172a *compl_mismatch probe      |
| vvi miR-1880 nat as  | tgcagcatcatcaagattc   | vvi-miR172b *compl_perfect match probe |
| vvi miR-1880 2mut as | tgcagaatcataaagattc   | vvi-miR172b *compl_mismatch probe      |
| vvi miR-1881 nat as  | tggagcatcatcaagattc   | vvi-miR172c *compl_perfect match probe |
| vvi miR-1881 2mut as | tggagaatcataaagattc   | vvi-miR172c *compl_mismatch probe      |
| vvi miR-1882 nat as  | atgcagcatcatcaagattc  | vvi-miR172d *compl_perfect match probe |
| vvi miR-1882 2mut as | atgcagaatcataaagattc  | vvi-miR172d *compl_mismatch probe      |
| vvi miR-1883 nat as  | ggagctctcttagtccag    | vvi-miR319b *compl_perfect match probe |
| vvi miR-1883 2mut as | ggagtctcttagcccag     | vvi-miR319b *compl_mismatch probe      |
| vvi miR-1884 nat as  | gagagcttcttcagtcca    | vvi-miR319c *compl_perfect match probe |
| vvi miR-1884 2mut as | gagagtttcttcagtcca    | vvi-miR319c *compl_mismatch probe      |
| vvi miR-1885 nat as  | gggggttccttgcagcccaaa | vvi-miR319e *compl_perfect match probe |
| vvi miR-1885 2mut as | ggggcttccttgcagtccaaa | vvi-miR319e *compl_mismatch probe      |

|                      |                       |                                   |
|----------------------|-----------------------|-----------------------------------|
| vvi miR-1886 nat as  | gagagcttccttcagcca    | probe                             |
| vvi miR-1886 2mut as | gagagtttccttcgcca     | vvi-miR319f *compl_perfect match  |
| vvi miR-1887 nat as  | gagctccttttagccaat    | probe                             |
| vvi miR-1887 2mut as | gagcttcttttagtcaat    | vvi-miR319f *compl_mismatch probe |
| vvi miR-1888 nat as  | ggcgctatctatcctgagttt | vvi-miR319g *compl_perfect match  |
| vvi miR-1888 2mut as | ggcgttatctattctgagttt | probe                             |
| vvi miR-1889 nat as  | ggatcatgctatcccttagga | vvi-miR390 *compl_perfect match   |
| vvi miR-1889 2mut as | ggatcctctatctcttagga  | probe                             |
| vvi miR-1890 nat as  | ggatcatgctatcccttggga | vvi-miR390 *compl_mismatch probe  |
| vvi miR-1890 2mut as | ggatcctctatctcttggga  | vvi-miR393a *compl_perfect match  |
| vvi miR-1891 nat as  | ggaggtggccagcatgccaa  | probe                             |
| vvi miR-1891 2mut as | ggaggtggcagcatcccaa   | vvi-miR393a *compl_mismatch       |
| vvi miR-1892 nat as  | ggaggtgggcatactgccaa  | probe                             |
| vvi miR-1892 2mut as | ggaggtggccatactcccaa  | vvi-miR393b *compl_perfect match  |
| vvi miR-1893 nat as  | ggaggcggccaggatgccaa  | probe                             |
| vvi miR-1893 2mut as | ggaggaggccaggatcccaa  | vvi-miR393b *compl_mismatch       |
| vvi miR-1894 nat as  | gagttccttgatcaactca   | probe                             |
| vvi miR-1894 2mut as | gagttctcttgatccctca   | vvi-miR394a *compl_perfect match  |
|                      |                       | probe                             |
|                      |                       | vvi-miR394a *compl_mismatch       |
|                      |                       | probe                             |
|                      |                       | vvi-miR394b *compl_perfect match  |
|                      |                       | probe                             |
|                      |                       | vvi-miR394b *compl_mismatch       |
|                      |                       | probe                             |
|                      |                       | vvi-miR394c *compl_perfect match  |
|                      |                       | probe                             |
|                      |                       | vvi-miR394c *compl_mismatch       |
|                      |                       | probe                             |
|                      |                       | vvi-miR395a *compl_perfect match  |
|                      |                       | probe                             |
|                      |                       | vvi-miR395a *compl_mismatch       |

|                      |                       |                                            |
|----------------------|-----------------------|--------------------------------------------|
| vvi miR-1895 nat as  | gagttccccttaccacttca  | probe<br>vvi-miR395b *compl_perfect match  |
| vvi miR-1895 2mut as | gagttcctcttacaacttca  | probe<br>vvi-miR395b *compl_mismatch       |
| vvi miR-1896 nat as  | gagttccccttgaccacttca | probe<br>vvi-miR395c *compl_perfect match  |
| vvi miR-1896 2mut as | gagttctcttgacaacttca  | probe<br>vvi-miR395c *compl_mismatch       |
| vvi miR-1897 nat as  | gagttcccctgaccacttca  | probe<br>vvi-miR395d *compl_perfect match  |
| vvi miR-1897 2mut as | gagttcctctgacaacttca  | probe<br>vvi-miR395d *compl_mismatch       |
| vvi miR-1898 nat as  | gagttcccctgaccacttca  | probe<br>vvi-miR395e *compl_perfect match  |
| vvi miR-1898 2mut as | gagttctcttgacaacttca  | probe<br>vvi-miR395e *compl_mismatch       |
| vvi miR-1899 nat as  | gagttcccctgaccacttca  | probe<br>vvi-miR395f *compl_perfect match  |
| vvi miR-1899 2mut as | gagttcctctgacaacttca  | probe<br>vvi-miR395f *compl_mismatch probe |
| vvi miR-1900 nat as  | gagttcccctgagcacttca  | probe<br>vvi-miR395g *compl_perfect match  |
| vvi miR-1900 2mut as | gagttcctctgagaacttca  | probe<br>vvi-miR395g *compl_mismatch       |
| vvi miR-1901 nat as  | gagttcccctgaccacttca  | probe<br>vvi-miR395h *compl_perfect match  |
| vvi miR-1901 2mut as | gagttctcttgacaacttca  | probe<br>vvi-miR395h *compl_mismatch       |
| vvi miR-1902 nat as  | gagttcccctgaccacttca  | probe<br>vvi-miR395i *compl_perfect match  |
| vvi miR-1902 2mut as | gagttcctctgacaacttca  | probe<br>vvi-miR395i *compl_mismatch probe |
| vvi miR-1903 nat as  | gagttcccctgaccacttca  | probe<br>vvi-miR395j *compl_perfect match  |
| vvi miR-1903 2mut as | gagttcctctgacaacttca  | probe<br>vvi-miR395j *compl_mismatch probe |

|                      |                        |                                        |
|----------------------|------------------------|----------------------------------------|
| vvi miR-1904 nat as  | gagttcccttgaccacttca   | vvi-miR395k *compl_perfect match probe |
| vvi miR-1904 2mut as | gagttctcttgacaacttca   | vvi-miR395k *compl_mismatch probe      |
| vvi miR-1905 nat as  | gagttcccctgaccacttca   | vvi-miR395l *compl_perfect match probe |
| vvi miR-1905 2mut as | gagttcctctgacaacttca   | vvi-miR395l *compl_mismatch probe      |
| vvi miR-1906 nat as  | gagttcccttgaacacttca   | vvi-miR395m *compl_perfect match probe |
| vvi miR-1906 2mut as | gagttctcttgaacccttca   | vvi-miR395m *compl_mismatch probe      |
| vvi miR-1907 nat as  | gagttccccaaccctccag    | vvi-miR395n *compl_perfect match probe |
| vvi miR-1907 2mut as | gagttccctcaacctctccag  | vvi-miR395n *compl_mismatch probe      |
| vvi miR-1908 nat as  | agttcaagaaagctgtgg     | vvi-miR396a *compl_perfect match probe |
| vvi miR-1908 2mut as | agttaagaaagttgtgg      | vvi-miR396a *compl_mismatch probe      |
| vvi miR-1909 nat as  | aagttcaagaaagctgtggaaa | vvi-miR396b *compl_perfect match probe |
| vvi miR-1909 2mut as | aagttaagaaagttgtggaaa  | vvi-miR396b *compl_mismatch probe      |
| vvi miR-1910 nat as  | cagctcaggaaagttgtggaa  | vvi-miR396c *compl_perfect match probe |
| vvi miR-1910 2mut as | cagctcagaaaagttgcggaa  | vvi-miR396c *compl_mismatch probe      |
| vvi miR-1911 nat as  | cggttcaataaagctgtggga  | vvi-miR396d *compl_perfect match probe |
| vvi miR-1911 2mut as | cggttaataaagttgtggga   | vvi-miR396d *compl_mismatch probe      |
| vvi miR-1912 nat as  | cattggcgctgcactcaatca  | vvi-miR397a *compl_perfect match probe |
| vvi miR-1912 2mut as | cattggccctgaactcaatca  | vvi-miR397a *compl_mismatch probe      |

|                      |                        |                                           |
|----------------------|------------------------|-------------------------------------------|
| vvi miR-1913 nat as  | cattggcgctgcaactcaatca | probe<br>vvi-miR397b *compl_perfect match |
| vvi miR-1913 2mut as | cattggccctgaactcaatca  | probe<br>vvi-miR397b *compl_mismatch      |
| vvi miR-1914 nat as  | agggagtggcacctgagaacac | probe<br>vvi-miR398a *compl_perfect match |
| vvi miR-1914 2mut as | agggagtgccatctgagaacac | probe<br>vvi-miR398a *compl_mismatch      |
| vvi miR-1915 nat as  | caggtgtgacctgagaatcaca | probe<br>vvi-miR398b *compl_perfect match |
| vvi miR-1915 2mut as | caggtgtgatccgagaatcaca | probe<br>vvi-miR398b *compl_mismatch      |
| vvi miR-1916 nat as  | caggagtgacctgagaatcaca | probe<br>vvi-miR398c *compl_perfect match |
| vvi miR-1916 2mut as | caggagtgatccgagaatcaca | probe<br>vvi-miR398c *compl_mismatch      |
| vvi miR-1917 nat as  | cagtgtgattctctttggca   | probe<br>vvi-miR399a *compl_perfect match |
| vvi miR-1917 2mut as | cagtgcgattctctttggca   | probe<br>vvi-miR399a *compl_mismatch      |
| vvi miR-1918 nat as  | tagggcacctctttcttggca  | probe<br>vvi-miR399b *compl_perfect match |
| vvi miR-1918 2mut as | taggccacctcttttttggca  | probe<br>vvi-miR399b *compl_mismatch      |
| vvi miR-1919 nat as  | cagggcctctttcacttgga   | probe<br>vvi-miR399c *compl_perfect match |
| vvi miR-1919 2mut as | cagggctctttcccttgga    | probe<br>vvi-miR399c *compl_mismatch      |
| vvi miR-1920 nat as  | gagcagattcttttggca     | probe<br>vvi-miR399d *compl_perfect match |
| vvi miR-1920 2mut as | gagccgatttttttggca     | probe<br>vvi-miR399d *compl_mismatch      |
| vvi miR-1921 nat as  | gggcaaattatcttttggca   | probe<br>vvi-miR399e *compl_perfect match |

|                      |                             |                                      |
|----------------------|-----------------------------|--------------------------------------|
| vvi miR-1921 2mut as | gggccaattatTTTTGGCA         | probe<br>vvi-miR399e *compl_mismatch |
| vvi miR-1922 nat as  | cattagagggccaaatctgcttggca  | probe                                |
| vvi miR-1922 2mut as | cattagaggggtcaaatctccttggca | vvi-miR399f *compl_perfect match     |
| vvi miR-1923 nat as  | gggcaataactccattggca        | probe                                |
| vvi miR-1923 2mut as | gggcaatattcaattggca         | vvi-miR399f *compl_mismatch probe    |
| vvi miR-1924 nat as  | cagtgc aaatcctccttggca      | vvi-miR399g *compl_perfect match     |
| vvi miR-1924 2mut as | cagtgaatccttcttggca         | probe                                |
| vvi miR-1925 nat as  | tagggcttctctccttctggc       | vvi-miR399g *compl_mismatch          |
| vvi miR-1925 2mut as | taggccttctcttcttctggc       | probe                                |
| vvi miR-1926 nat as  | agtttgtgcgtgaatcaaa         | vvi-miR399h *compl_perfect match     |
| vvi miR-1926 2mut as | agtttgtgagcgaatcaaa         | probe                                |
| vvi miR-1927 nat as  | cgagtttgtgcgcaatccaa        | vvi-miR399i *compl_mismatch probe    |
| vvi miR-1927 2mut as | cgagtttgtgagagaatccaa       | vvi-miR403a *compl_perfect match     |
| vvi miR-1928 nat as  | caagtttgtgcgtgaatcaaa       | probe                                |
| vvi miR-1928 2mut as | caagtttgtgactgaatcaaa       | vvi-miR403a *compl_mismatch          |
| vvi miR-1929 nat as  | cgagtttgtgcgcaatc           | probe                                |
| vvi miR-1929 2mut as | cgagtttgcgcgagaatc          | vvi-miR403b *compl_perfect match     |
| vvi miR-1930 nat as  | caagtttgtgcgtgaatcaaa       | probe                                |
|                      |                             | vvi-miR403b *compl_mismatch          |
|                      |                             | vvi-miR403c *compl_perfect match     |
|                      |                             | probe                                |
|                      |                             | vvi-miR403c *compl_mismatch          |
|                      |                             | probe                                |
|                      |                             | vvi-miR403d *compl_perfect match     |
|                      |                             | probe                                |
|                      |                             | vvi-miR403d *compl_mismatch          |
|                      |                             | probe                                |
|                      |                             | vvi-miR403e *compl_perfect match     |

|                      |                       |                                      |
|----------------------|-----------------------|--------------------------------------|
| vvi miR-1930 2mut as | caagtttgtgactgaatcaaa | probe<br>vvi-miR403e *compl_mismatch |
| vvi miR-1931 nat as  | gagtttgtgcgtgactctaa  | probe                                |
| vvi miR-1931 2mut as | gagtttgtgactgactctaa  | vvi-miR403f *compl_perfect match     |
| vvi miR-1932 nat as  | cggggacgaggtagtgcac   | probe                                |
| vvi miR-1932 2mut as | cggggaagagctagtgcac   | vvi-miR403f *compl_mismatch probe    |
| vvi miR-1933 nat as  | ttggaagacagtgggggacct | vvi-miR408 *compl_perfect match      |
| vvi miR-1933 2mut as | ttggaagaaagtgggtgacct | probe                                |
| vvi miR-1934 nat as  | gacgagccgaaccaatatcac | vvi-miR408 *compl_mismatch probe     |
| vvi miR-1934 2mut as | gacgagtcgaacaaatatcac | vvi-miR477a *compl_perfect match     |
| vvi miR-1935 nat as  | ggaattggagagtagg      | probe                                |
| vvi miR-1935 2mut as | ggaattcgagactagg      | vvi-miR477a *compl_mismatch          |
| vvi miR-1936 nat as  | ggcgtgctctctcgtgtca   | probe                                |
| vvi miR-1936 2mut as | ggcgtcctctctccctgtca  | vvi-miR479 *compl_perfect match      |
| vvi miR-1937 nat as  | ggcgtgctctctcgtgtca   | probe                                |
| vvi miR-1937 2mut as | ggcgtcctctctccctgtca  | vvi-miR479 *compl_mismatch probe     |
| vvi miR-1938 nat as  | ggcgtgctctctcgtgtca   | vvi-miR482a *compl_perfect match     |
| vvi miR-1938 2mut as | ggcgtcctctctccctgtca  | probe                                |
| vvi miR-1939 nat as  | ggcgtgctctctcgtgtca   | vvi-miR482a *compl_mismatch          |
|                      |                       | probe                                |
|                      |                       | vvi-miR535a *compl_perfect match     |
|                      |                       | probe                                |
|                      |                       | vvi-miR535a *compl_mismatch          |
|                      |                       | probe                                |
|                      |                       | vvi-miR535b *compl_perfect match     |
|                      |                       | probe                                |
|                      |                       | vvi-miR535b *compl_mismatch          |
|                      |                       | probe                                |
|                      |                       | vvi-miR535c *compl_perfect match     |
|                      |                       | probe                                |
|                      |                       | vvi-miR535c *compl_mismatch          |
|                      |                       | probe                                |
|                      |                       | vvi-miR535d *compl_perfect match     |
|                      |                       | probe                                |

|                      |                        |                                           |
|----------------------|------------------------|-------------------------------------------|
| vvi miR-1939 2mut as | ggcgtcctctctgtccctgtca | vvi-miR535d *compl_mismatch<br>probe      |
| vvi miR-1940 nat as  | ggcgtgctctctgtcgctgtca | vvi-miR535e *compl_perfect match<br>probe |
| vvi miR-1940 2mut as | ggcgtcctctctgtccctgtca | vvi-miR535e *compl_mismatch<br>probe      |
| vvi miR-1941 nat as  | tgagatgctcatttgaggaag  | vvi-miR828a *compl_perfect match<br>probe |
| vvi miR-1941 2mut as | tgagatcctcatttgacgaag  | vvi-miR828a *compl_mismatch<br>probe      |
| vvi miR-1942 nat as  | tggatagtcatttctgcaa    | vvi-miR828b *compl_perfect match<br>probe |
| vvi miR-1942 2mut as | tggatagccattttctgcaa   | vvi-miR828b *compl_mismatch<br>probe      |
| vvi miR-1943 nat as  | attagtccttcatgagtta    | vvi-miR845a *compl_perfect match<br>probe |
| vvi miR-1943 2mut as | attagtttctcataagtta    | vvi-miR845a *compl_mismatch<br>probe      |
| vvi miR-1944 nat as  | attagtccttcatgagtt     | vvi-miR845b *compl_perfect match<br>probe |
| vvi miR-1944 2mut as | attagtttctcataagtt     | vvi-miR845b *compl_mismatch<br>probe      |
| vvi miR-1945 nat as  | tgttttggttgctgagttt    | vvi-miR845c *compl_perfect match<br>probe |
| vvi miR-1945 2mut as | tgttttcgttctctgagttt   | vvi-miR845c *compl_mismatch<br>probe      |
| vvi miR-1946 nat as  | cattaattatccctagggcca  | vvi-miR845d *compl_perfect match<br>probe |
| vvi miR-1946 2mut as | cattaattattcctagtgcca  | vvi-miR845d *compl_mismatch<br>probe      |
| vvi miR-1947 nat as  | cattaattatccctagggcca  | vvi-miR845e *compl_perfect match<br>probe |
| vvi miR-1947 2mut as | cattaattattcctagtgcca  | vvi-miR845e *compl_mismatch<br>probe      |

---

Degradation and Negative control probes have been used to define background level. Mismatch probes have been designed by the Combimatrix Company for each perfect match probe, to assess the quality of each hybridization. For each miRNA precursor molecules many different probes have been designed. In particular there are probes designed on the predicted mature miRNA; probes designed on the predicted miRNA\* (marked as |\*); probes shifted of 5 or 10 nucleotide towards the 5' (|+5 and |+10) or the 3' (|-5 and |-10) with respect to the start of the expected mature miRNA; probes shifted of 5 or 10 nucleotide towards the 5' (|\*+5 and |\*+10) or the 3' (|\*-5 and |\*-10) with respect to the start of the expected mature miRNA\*, probes of exactly 20 nucleotide designed on the predicted miRNA, when longer than 20nt (|0); probes of exactly 20 nucleotide designed on the predicted miRNA\*, when longer than 20nt (|\*0), probes designed on the precursor sequence, outside the miRNA or miRNA\* region (|ctrl) and finally complementary probes to the miRNA probe (|compl) and to the miRNA\* (|\*compl).

---
